# Supplementary material for: Live-cell imaging in human colonic monolayers reveals ERK waves limit the stem cell compartment to maintain epithelial homeostasis
Source: eLife journal article supplement (doi:10.7554/elife.78837), 2022-09-12
Supplement: data1 [file Replicate_key.xls]

## Sheet: Replicate key
	Technical Replicates	Biological Replicates	Shown in figure		Technical Replicates: Frames or Wells
F1D	16	>10	84 nodes		Biological Replicates: Full Experiment Repeat
F2Cki67	4	3	Technical Replicates
F2CEdU	4	3	Technical Replicates
F2DMYC	16	4	64-224 cells
F2DLGR5	16	4	64-224 cells
F2DKRT20	16	4	29-186 cells
F3D and 3F	1	>10	612 cells
F3H	4	>10	96 time points
F4C	16	>5	255-256 cells
F4E	16	>5	3523 cells
F4F	4	>5	53 images
F5B	16	3	16 images x 54 time points
F5C	2	3	85-91 images
F5D	2	3	69 images
F5F	2	3	69 images
F5H	2	3	68-101 images
F6B	16	2	386-401 cells
F6D	16	2	287 cells
F6Etop	2	3	1844-5160 cells
F6Ebottom	2	3	14-79 images
F6G	16	2	5014-11282 cells
