# Supplementary material for: Live-cell imaging in human colonic monolayers reveals ERK waves limit the stem cell compartment to maintain epithelial homeostasis
Source: eLife. 2022 Sep 12;11:e78837. doi: 10.7554/eLife.78837 (PMC9499537; doi:10.7554/eLife.78837)
Supplement: Figure 1—source data 1. [file elife-78837-fig1-data1.xls]

## Sheet: Figure 1D
Node
318.728
411.894
407.213
287.313
369.998
352.836
266.765
266.765
352.836
459.607
318.728
416.147
141.743
591.481
141.743
416.147
141.743
259.518
141.743
411.894
383.204
295.704
209.027
557.942
570.001
259.518
543.113
459.607
209.027
505.391
295.704
232.902
557.942
802.593
592.578
625.706
274.47
411.822
232.902
744.066
375.658
422.574
821.638
375.658
454.938
262.757
357.232
1027.09
290.759
262.757
323.901
306.678
454.938
286.532
306.678
323.901
286.532
313.695
1118.43
781.021
464.956
313.695
288.643
891.419
288.643
318.353
372.031
496.187
248.733
367.58
318.353
248.733
397.552
904.79
154.326
496.187
216.99
154.326
364.569
402.678
575.428
217.892
400.856
340.349
