# Supplementary material for: Live-cell imaging in human colonic monolayers reveals ERK waves limit the stem cell compartment to maintain epithelial homeostasis
Source: eLife. 2022 Sep 12;11:e78837. doi: 10.7554/eLife.78837 (PMC9499537; doi:10.7554/eLife.78837)
Supplement: Figure 2—source data 1. [file elife-78837-fig2-data1.xls]

## Sheet: Figure 2C EdU
Node	Non-node
18.9003	2.57732
25.0737	1.10619
20.3704	2.77778
12.5313	0.626566
