# Supplementary material for: Live-cell imaging in human colonic monolayers reveals ERK waves limit the stem cell compartment to maintain epithelial homeostasis
Source: eLife. 2022 Sep 12;11:e78837. doi: 10.7554/eLife.78837 (PMC9499537; doi:10.7554/eLife.78837)
Supplement: Figure 2—source data 2. [file elife-78837-fig2-data2.xls]

## Sheet: Figure 2C ki67
Node	Non-node
44.6735	6.01375
47.1976	3.68732
35.1852	7.40741
20.0501	3.13283
