# Supplementary material for: Live-cell imaging in human colonic monolayers reveals ERK waves limit the stem cell compartment to maintain epithelial homeostasis
Source: eLife. 2022 Sep 12;11:e78837. doi: 10.7554/eLife.78837 (PMC9499537; doi:10.7554/eLife.78837)
Supplement: Figure 2—source data 3. [file elife-78837-fig2-data3.xls]

## Sheet: Figure 2D MYC
Node	Non-node
230.374	162.429
233.458	179.68
262.243	170.554
251.538	178.869
269.478	189.536
271.23	183.552
260.729	217.425
367.774	202.886
287.323	195.146
286.228	206.896
250.317	216.028
288.982	196.656
306.574	198.726
280.652	202.019
277.312	255.858
291.646	183.668
271.668	177.051
306.178	165.703
311.029	196.324
300.652	200.63
385.273	199.395
257.537	186.478
346.872	197.819
349.779	195.862
266.448	200.119
365.621	181.32
310.982	195.867
289.973	183.967
312	207.771
338.211	174
349.634	204.631
314.633	187.899
303.415	177.912
277.072	194.836
293.836	210.821
321.026	201.029
316.257	180.658
270.788	203.856
305.921	182.002
260.543	184.758
269.862	189.83
277.382	200.266
275.997	189.925
309.907	212.77
327.09	176.3
265.846	206.764
230.308	197.014
242.9	182.681
328.432	195.047
277.386	206.638
276.048	205.922
322.209	173.133
271.687	181.202
267.934	179.856
264.178	202.786
301.965	186.095
253.818	205.103
275.335	182.259
370.435	209.356
275.725	214.84
244.721	182.922
257.625	190.49
370.573	206.269
229.603	191.227
	179.953
	189.606
	227.829
	217.028
	211.645
	206.501
	205.393
	178.818
	187.83
	194.659
	186.625
	196.002
	212.026
	199.62
	226.382
	190.058
	216.723
	211.436
	207.11
	203.809
	216.86
	190.684
	249.994
	226.86
	191.221
	216.386
	195.339
	229.371
	228.494
	177.489
	207.476
	198.856
	238.825
	207.367
	208.182
	189.286
	194.021
	208.582
	220.02
	235
	218.348
	216.95
	213.757
	239.045
	216.975
	216.751
	221.111
	250.188
	195.51
	246.334
	210.971
	241.745
	234.079
	233.562
	233.493
	234.647
	244.71
	228.622
	235.825
	248.435
	233.31
	198.511
	253.922
	247.658
	216.79
	231.199
	239.784
	228.683
	280.923
	231.08
	209.498
	218.5
	247.97
	218.903
	244.291
	242.863
	200.342
	176.858
	259.51
	221.961
	204.922
	230.898
	219.872
	205.501
	249.498
	207.121
	252.467
	299.54
	195.587
	235.783
	236.16
	243.304
	246.509
	260.067
	233.301
	251.098
	210.06
	276.282
	235.056
	225.779
	261.367
	260.413
	199.564
	271.968
	233.475
	201.745
	271.693
	232.628
	249.887
	223.395
	229.472
	254.063
	184.141
	209.506
	219.703
	225.085
	164.058
	222.859
	192.313
	229.487
	233.938
	199.307
	183.543
	223.377
	195.041
	240.951
	201.189
	233.436
	220.151
	215.783
	208.469
	242.262
	218.249
	203.045
	182.877
	197.395
	161.721
	156.904
	201.636
	183.592
	194.977
	196.884
	174.197
	191.118
	219.207
	160.121
	176.869
	190.205
	186.814
	161.052
	178.391
	158.931
	215.878
	167.146
	185.657
	191.199
	158.285
	185.449
	221.109
	196.94
