# Supplementary material for: Live-cell imaging in human colonic monolayers reveals ERK waves limit the stem cell compartment to maintain epithelial homeostasis
Source: eLife. 2022 Sep 12;11:e78837. doi: 10.7554/eLife.78837 (PMC9499537; doi:10.7554/eLife.78837)
Supplement: Figure 3—source data 1. [file elife-78837-fig3-data1.xlsx]

## Sheet: DataExplanation
Each sheet contains a matrix where the rows are single cells and the columns are timepoints. Images were captured every 30 minutes
Variable	Explanation
Centroid_X	Location on the X axis of the centroid of the cell
Centroid_Y	Location on the Y axis of the centroid of the cell
DeathMatrix	A 1 indicates the cell died at this timepoint. A 0 indicates the cell did not die at this timepoint
DivisionMatrix	A 1 indicates the cell divided at this timepoint. A 0 indicates the cell did not divide at this timepoint
ERK_fNuc	The fraction of the ERK-KTR signal in the nucleus
ERK_Nuc	Mean Nuclear ERK-KTR signal
ERK_Cyt	Mean Cytoplasmic ERK-KTR signal

## Sheet: Centroid_X
1390	1392	1393	1393	1392	1388	1387	1372	1368	1366	1369	1371	1374	1383	1379	1384	1384	1386	1387	1390	1387	1383	1386	1389	1393	1393	1396	1398	1400	1399
1404	1407	1401	1406	1400	1406	1397	1387	1380	1380	1403	1408	1408	1410	1409	1409	1407	1410	1405	1412	0	0	0	0	0	0	0	0	0	0
1142	1143	1145	1151	1158	1163	1182	0	0	0	0	0	0	0	0	0	0	0	0	0	0	0	0	0	0	0	0	0	0	0
0	0	0	0	0	0	0	0	0	935	932	924	926	921	916	918	919	919	0	0	0	0	0	0	0	0	0	0	0	0
0	0	0	0	0	0	0	0	0	935	932	924	895	893	892	887	884	884	889	889	896	904	907	908	909	908	907	906	906	906
1371	1374	1374	1375	1374	1381	1373	1363	1379	1350	1351	1354	1356	1360	1362	1363	1363	1362	1361	1357	1348	1347	1348	1347	1351	1355	1358	1360	1358	1359
1366	1367	1365	1365	1363	1362	1353	1350	1344	1343	1346	1346	1348	1352	1353	1354	1354	1355	1357	1353	1350	1344	1343	1343	1347	1349	1352	1354	1356	1358
1380	1380	1383	1380	1382	1389	1381	1372	1367	1362	1363	1362	1363	1367	1369	1370	1370	1371	1372	1366	1360	1355	1354	1354	1360	1362	1364	1367	1371	1372
1419	1425	1428	1431	1432	1433	1428	1419	1416	1403	1401	1407	1405	1410	1411	1411	1412	1412	1411	1414	1411	1403	1409	1410	1413	1417	1420	1425	1426	1422
0	0	0	0	0	0	0	0	0	0	0	0	0	0	0	0	0	0	0	0	0	0	0	0	0	0	0	0	0	0
1435	1435	1435	1438	1441	1444	1435	1431	1421	1422	1424	1425	1429	1432	1436	1437	1443	1443	1446	1442	1440	1441	1441	1444	1446	1447	1452	1455	1455	0
1432	1433	1430	1434	1435	1432	1427	1423	1409	1417	1425	1432	1436	1440	1439	1439	1443	1444	1444	1437	1425	1424	1433	1439	1442	1445	1447	1450	1449	0
1372	1368	1378	1385	1376	1380	1376	1353	1345	1344	1357	1364	1378	1379	1382	1381	1388	1388	1385	1377	1367	1356	1354	1363	1364	1369	1372	1374	1374	1377
1323	1325	1328	1331	1338	1333	1331	1322	1318	1318	1329	1335	1340	1345	1341	1340	1338	1336	1338	1335	1328	1335	1333	1335	1338	1339	1337	1337	1339	1339
1275	1277	1293	1297	1286	1298	1285	1311	1276	1278	1291	1299	1293	1286	1295	1296	1289	1289	1287	1282	1271	1281	1279	1280	1282	1272	1273	1280	1278	1278
1241	1233	1233	1245	1251	1254	1255	1230	1224	1253	1250	1265	1280	1289	1292	1290	1289	1286	1284	1274	1268	1257	1251	1252	1266	1263	1267	1268	1268	1268
1432	1437	1437	1437	1434	1437	1437	1426	1411	1406	1409	1409	1411	1410	1417	1419	1418	1419	1420	1417	1413	1414	1411	1418	1421	1423	1422	1424	1426	1425
1458	1461	1462	1463	1464	1464	1461	1462	1455	1451	1447	1448	1449	1452	1452	1452	1456	1451	1455	1455	1450	1450	1447	1450	1452	1454	1456	1457	1458	1458
1462	1464	1449	1459	1456	1457	1462	1447	1435	1436	1439	1450	1451	1455	1458	1459	1460	1460	1463	1461	1455	1449	1444	1448	1453	1457	1462	1460	1462	1466
1464	1469	1469	1469	1471	1471	1471	1470	1469	1462	1462	1467	1466	1466	1466	1467	1470	1470	1469	1470	1470	1465	1469	1469	1469	1469	1469	1471	1472	1473
1430	1434	1435	1438	1438	1438	1437	1433	1426	1424	1425	1427	1427	1431	1429	1430	1433	1434	1437	1442	1436	1433	1432	1435	1436	1436	1437	1439	1441	1440
1395	1401	1407	1408	1409	1407	1409	1405	1394	1406	1397	1392	1389	1390	1390	1394	1393	1394	1396	1390	1390	1390	1385	1386	1391	1392	1395	1397	1399	1399
1313	1310	1311	1310	1300	1300	1302	1304	1298	1299	1299	1298	1297	1299	1299	1299	1299	1299	1296	1290	1290	1287	1283	1288	1284	1290	1293	1298	1300	1305
1287	1291	1290	1290	1289	1292	1288	1287	1286	1289	1286	1293	1293	1295	1297	1299	1301	1302	1305	1296	1290	1283	1285	1290	1289	1291	1290	1305	1296	1297
1298	1300	1301	1306	1308	1309	1309	1308	1302	1300	1300	1299	1298	1297	1298	1296	1296	1296	1304	1294	1284	1285	1283	1286	1287	1290	1292	1295	1297	1296
1266	1262	1273	1274	1272	1272	1264	1265	1257	1259	1268	1266	1268	1270	1269	1270	1269	1264	1263	1258	1261	1255	1255	1258	1260	1265	1269	1271	1275	1277
1211	1214	1218	1223	1220	1221	1221	1215	1221	1223	1232	1233	1242	1242	1242	1243	1244	1239	1224	1231	1234	1235	1235	1235	1235	1237	1237	1237	1238	1237
1204	1206	1212	1217	1218	1217	1215	1210	1217	1213	1216	1218	1221	1222	1220	1220	1217	1214	1218	1212	1210	1209	1205	1205	1206	1208	1210	1212	1211	1211
1223	1222	1225	1227	1226	1225	1225	1222	1223	1222	1225	1224	1225	1226	1230	1232	1230	1235	1234	1230	1218	1223	1226	1227	1229	1231	1233	1235	1235	1236
1324	1324	1324	1324	1320	1320	1309	1312	1310	1311	1318	1322	1326	1327	1331	1330	1328	1328	1326	1318	1311	1308	1304	1302	1298	1309	1309	1310	1312	0
1327	1328	1336	1338	1338	1340	1343	1342	1339	1336	1340	1336	1335	1336	1340	1340	1347	1344	1339	1328	1326	1327	1328	1331	1332	1332	1339	1343	1341	1344
1342	1347	1347	1353	1356	1354	1354	1352	1346	1340	1337	1335	1333	1334	1335	1335	1334	1333	1329	1329	1323	1324	1322	1324	1326	1328	1331	1334	1336	1336
1257	1260	1263	1269	1270	1267	1264	1259	1253	1257	1257	1259	1262	1265	1266	1266	1265	1264	1258	1255	1256	1257	1258	1261	1263	1263	1263	1266	1265	1262
1164	1171	1174	1177	1181	1181	1178	1168	1170	1166	1159	1161	1152	1161	1163	1163	1166	1166	1160	1166	1166	1167	1167	1168	1168	1168	1172	1172	1172	1170
1162	1162	1168	1174	1170	1168	1170	1170	1173	1178	1188	1192	1195	1194	1193	1187	1194	1193	1182	1180	1182	1185	1182	1181	1180	1181	1183	1185	1187	1186
1262	1263	1266	1286	1286	1294	1290	1277	1282	1282	1287	1294	1301	1306	1309	1312	1312	1313	1318	1313	1307	1303	1295	1295	1297	1300	1306	1308	1311	1310
1248	1253	1256	1268	1270	1283	1275	1256	1262	1269	1278	1285	1291	1296	1298	1302	1300	1300	1300	1293	1287	1283	1281	1281	1283	1285	1290	1294	1297	1294
0	0	0	0	0	0	0	0	0	0	0	0	0	0	0	0	0	0	0	0	1387	1384	1388	1408	1410	1411	1415	1418	1420	1421
1415	1418	1410	1417	1414	1417	1414	1407	1402	1398	1402	1406	1410	1417	1421	1424	1425	1427	1429	1430	1427	1418	1411	1419	1419	1425	1428	1428	1432	1436
1402	1401	1396	1398	1403	1406	1400	1389	1387	1387	1393	1395	1401	1404	1406	1407	1410	1410	1406	1408	1401	1404	1397	1395	1399	1404	1411	1410	1413	1417
1361	1350	1354	1359	1366	1372	1362	1349	1342	1344	1345	1352	1357	1359	1359	1366	1372	1365	1364	1365	1356	1355	1349	1348	1350	1352	1356	1365	1371	1371
1343	1344	1346	1352	1361	1357	1350	1343	1334	1331	1338	1346	1345	1345	1346	1348	1353	1348	1350	1346	1349	1348	1344	1341	1339	1342	1349	1349	1350	1344
1312	1318	1317	1316	1325	1329	1329	1320	1310	1311	1318	1320	1326	1333	1334	1335	1329	1331	1326	1323	1317	1305	1306	1307	1299	1303	1306	1313	1320	1314
1394	1399	1399	1397	1407	1409	1395	1410	1386	1385	1400	1404	1401	1398	1390	1388	1388	1403	1397	1399	1407	1405	1402	1386	1391	1397	1403	1400	1403	1398
1388	1394	1395	1390	1390	1395	1393	1384	1391	1385	1390	1398	1401	1401	1397	1395	1401	1405	1404	1407	1415	1411	1406	1403	1404	1406	1406	1407	1412	1412
1439	1437	1436	1435	1436	1441	1441	1441	1437	1437	1439	1443	1442	1449	1443	1447	1446	1448	1447	1447	1448	1444	1440	1447	1445	1447	1450	1456	1458	1462
1318	1321	1316	1321	1324	1329	1321	1313	1310	1305	1299	1301	1305	1310	1313	1314	1312	1312	1307	1307	1304	1302	1296	1296	1296	1302	1306	1310	1310	1312
1480	1480	1480	1480	1480	1480	1480	1480	1480	1478	1480	1480	1480	1480	1480	1480	1480	1480	1480	1480	1480	1480	1477	1478	1480	1480	1480	1480	0	0
1293	1296	1291	1295	1298	1298	1299	1296	1288	1283	1290	1289	1298	1299	1303	1307	1305	1299	1294	1294	1290	1283	1279	1277	1279	1281	1282	1286	1285	1294
1277	1278	1280	1285	1291	1294	1294	1284	1284	1284	1285	1287	1295	1293	1295	1297	1297	1297	1299	1303	1296	1293	1293	1295	1294	1297	1298	1298	1299	1298
1268	1272	1277	1278	1278	1286	1286	1278	1273	1268	1264	1270	1275	1275	1277	1277	1278	1277	1276	1276	1274	1269	1267	1269	1268	1268	1269	1271	1267	1267
1246	1248	1247	1252	1256	1261	1259	1256	1247	1240	1247	1247	1251	1254	1257	1258	1257	1256	1255	1255	1254	1253	1254	1254	1254	1255	1255	1255	1257	1258
1225	1229	1234	1242	1245	1250	1242	1241	1237	1239	1244	1249	1252	1255	1257	1258	1258	1257	1259	1260	1253	1253	1254	1253	1252	1251	1252	1255	1256	1254
1260	1266	1269	1269	1267	1267	1272	1268	1268	1265	1265	1266	1269	1275	1278	1281	1281	1276	1270	1266	1260	1253	1251	1249	1251	1256	1258	1268	1268	1271
1242	1243	1244	1246	1248	1251	1258	1251	1261	1246	1248	1248	1253	1255	1257	1259	1260	1255	1250	1248	1257	1244	1244	1246	1245	1243	1243	1244	1246	1246
1315	1317	1313	1314	1315	1320	1320	1312	1309	1318	1317	1313	1332	1335	1336	1326	1327	1340	1333	1330	1329	1332	1333	1343	1335	1332	1337	1337	1341	1342
1348	1345	1343	1339	1343	1347	1347	1347	1340	1340	1340	1342	1348	1346	1345	1342	1343	1348	1350	1351	1349	1351	1350	1350	1351	1353	1353	1355	1355	1359
1332	1326	1325	1320	1326	1329	1333	1343	1356	1343	1344	1344	1344	1349	1351	1348	1347	1356	1351	1341	1357	1357	1356	1356	1359	1359	1359	1358	1356	1356
1288	1283	1278	1277	1280	1281	1284	1285	1288	1286	1289	1290	1292	1295	1295	1292	1293	1297	1299	1298	1303	1300	1304	1301	1297	1301	1296	1296	1300	1300
1283	1280	1278	1278	1278	1277	1281	1289	1292	1293	1290	1293	1296	1295	1295	1297	1293	1304	1297	1310	1313	1305	1311	1307	1310	1307	1304	1305	1305	1304
1298	1301	1303	1306	1302	1299	1304	1307	1307	1316	1301	1304	1305	1309	1316	1315	1317	1323	1332	1335	1334	1333	1330	1332	1330	1326	1325	1323	1322	1323
1372	1350	1353	1348	1348	1355	1354	1359	1364	1362	1375	1366	1368	1375	1366	1358	1360	1361	1370	1378	1381	1377	1375	1375	1374	1365	1364	1364	1365	1364
1263	1263	1258	1257	1259	1258	1257	1244	1267	1268	1268	1271	1269	1269	1269	1271	1272	1279	1286	1277	1275	1288	1284	1284	1282	1281	1281	1279	1277	1276
1401	1402	1400	1397	1401	1408	1407	1408	1412	1410	1410	1406	1410	1412	1412	1411	1412	1421	1425	1433	1437	1436	1437	1437	1433	1430	1431	1434	1432	1432
1448	1445	1439	1436	1438	1442	1443	1442	1438	1445	1446	1445	1446	1445	1441	1444	1444	1448	1441	1449	1463	1464	1465	1465	1464	1460	1459	1458	1459	1461
1406	1418	1415	1416	1423	1426	1424	1428	1431	1420	1424	1415	1415	1414	1415	1418	1420	1429	1447	1458	1450	1449	1429	1420	1421	1426	1422	1419	1415	1418
1452	1450	1447	1450	1451	1453	1453	1472	1470	1459	1460	1456	1456	1456	1457	1455	1455	1462	1469	1470	1480	1480	1480	1480	1480	1480	1480	1480	1480	1478
1436	1445	1446	1451	1455	1454	1460	1464	1479	1467	1461	1463	1456	1458	1455	1462	1463	1471	1480	1480	1480	1480	1480	1480	1480	1476	1478	1478	1480	1480
1270	1265	1254	1267	1276	1279	1275	1280	1264	1265	1272	1278	1277	1272	1277	1280	1280	1290	1294	1282	1293	1291	1287	1293	1280	1276	1285	1272	1273	1274
1232	1238	1239	1241	1244	1243	1238	1239	1246	1240	1242	1238	1243	1244	1247	1246	1249	1250	1253	1257	1265	1263	1260	1259	1260	1265	1261	1256	1262	1265
1196	1200	1200	1202	1202	1203	1204	1188	1221	1213	1211	1208	1212	1215	1215	1210	1220	1216	1216	1216	1217	1214	1217	1219	1220	1216	1223	1226	1226	1226
1200	1202	1203	1203	1202	1203	1205	1203	1203	1209	1206	1204	1204	1208	1210	1211	1208	1209	1207	1203	1203	1204	1209	1212	1213	1206	1203	1205	1206	1206
1207	1222	1220	1213	1213	1218	1226	1214	1216	1213	1213	1215	1222	1225	1225	1225	1222	1222	1222	1214	1214	1216	1212	1206	1206	1206	1212	1211	1211	1212
1234	1237	1242	1244	1249	1249	1252	1248	1244	1238	1238	1242	1242	1249	1249	1250	1250	1251	1247	1248	1244	1243	1239	1235	1227	1230	1230	1230	1231	1233
1208	1216	1221	1221	1225	1232	1232	1226	1226	1226	1228	1229	1233	1235	1238	1238	1239	1239	1231	1228	1225	1229	1232	1229	1223	1219	1221	1225	1222	1227
1171	1165	1172	1165	1165	1167	1174	1169	1170	1173	1176	1176	1170	1171	1172	1173	1174	1173	1172	1171	1167	1174	1174	1170	1171	1171	1171	1172	1173	1171
1181	1185	1188	1189	1189	1190	1184	1184	1184	1183	1184	1189	1191	1192	1191	1192	1191	1192	1192	1191	1194	1198	1199	1200	1202	1199	1198	1196	1197	1197
1170	1160	1157	1160	1156	1155	1155	1158	1155	1156	1160	1162	1163	1164	1164	1163	1163	1161	1161	1163	1162	1165	1170	1170	1176	1177	1177	1177	1177	1177
1452	1460	1462	1466	1469	1468	1473	1473	1475	1475	1476	1477	1479	1480	1480	1481	1477	1478	1477	1479	1479	1479	1479	1479	1478	1480	1480	1473	1469	1465
1412	1422	1426	1430	1431	1439	1440	1442	1448	1445	1442	1442	1443	1448	1448	1442	1445	1444	1450	1459	1460	1460	1460	1451	1450	1447	1439	1432	1434	1437
1169	1177	1183	1186	1187	1185	1186	1181	1177	1177	1183	1187	1185	1184	1183	1184	1185	1187	1187	1187	1184	1187	1187	1181	1179	1176	1171	1173	1173	1173
1203	1212	1210	1214	1221	1221	1217	1214	1214	1209	1214	1217	1223	1225	1227	1230	1223	1223	1224	1227	1223	1217	1220	1221	1219	1213	1213	1217	1217	1217
1208	1205	1204	1215	1224	1227	1232	1216	1203	1231	1241	1248	1246	1250	1252	1255	1257	1261	1253	1255	1244	1240	1235	1239	1242	1247	1255	1259	1260	1262
1183	1183	1186	1191	1205	1210	1208	1189	1193	1198	1205	1211	1213	1215	1222	1220	1220	1225	1223	1222	1208	1206	1208	1205	1208	1210	1219	1226	1226	1225
1160	1174	1177	1187	1193	1194	1183	1174	1172	1175	1176	1177	1179	1190	1190	1194	1189	1190	1191	1197	1185	1181	1184	1189	1188	1183	1177	1176	1186	1184
1176	1181	1179	1177	1185	1181	1181	1184	1186	1190	1192	1193	1195	1195	1197	1195	1198	1191	1193	1190	1184	1185	1186	1186	1188	1187	1188	1187	1187	1184
1133	1131	1134	1136	1145	1144	1154	1150	1156	1163	1172	1186	1193	1197	1200	1198	1198	1193	1194	1184	1176	1167	1165	1170	1171	1172	1178	1178	1183	1183
1100	1094	1094	1097	1102	1106	1112	1121	1132	1142	1153	1158	1158	1165	1165	1168	1162	1162	1165	1154	1149	1145	1145	1141	1140	1141	1138	1137	1139	1140
1162	1160	1158	1160	1160	1160	1160	1155	1156	1156	1159	1161	1162	1163	1163	1164	1163	1163	1164	1164	1168	1171	1169	1171	1171	1171	1171	1171	1170	1170
1145	1147	1144	1144	1142	1142	1142	1145	1150	1142	1137	1147	1141	1143	1144	1143	1145	1146	1148	1149	1153	1151	1154	1154	1154	1155	1154	1154	1156	1156
1127	1122	1126	1131	1132	1131	1136	1135	1137	1136	1144	1152	1156	1160	1158	1157	1160	1163	1167	1146	1144	1149	1151	1155	1155	1165	1164	1171	1162	1162
1099	1096	1099	1100	1102	1097	1106	1114	1116	1120	1124	1131	1135	1133	1138	1141	1139	1142	1141	1138	1131	1124	1126	1121	1122	1124	1131	1133	1131	1130
1073	1070	1074	1079	1084	1085	1095	1103	1105	1113	1121	1128	1135	1135	1137	1142	1147	1149	1150	1151	1149	1147	1145	1145	1145	1144	1144	1143	1141	1141
1138	1139	1138	1140	1136	1145	1148	1145	1141	1146	1147	1147	1146	1148	1153	1158	1156	1154	1152	1150	1153	1152	1151	1151	1148	1148	1152	1154	1155	1156
1075	1077	1080	1080	1085	1088	1098	1100	1095	1095	1096	1098	1100	1103	1103	1106	1106	1114	1113	1122	1124	1118	1120	1122	1114	1116	1117	1118	1118	1119
1049	1049	1053	1051	1055	1061	1062	1067	1080	1087	1089	1092	1093	1098	1095	1091	1091	1093	1094	1098	1097	1095	1093	1093	1092	1093	1094	1095	1095	1096
1033	1037	1042	1042	1043	1047	1054	1056	1057	1060	1063	1063	1060	1060	1060	1060	1055	1062	1068	1076	1076	1075	1071	1071	1069	1070	1072	1072	1072	1075
1123	1131	1137	1142	1145	1140	1141	1140	1137	1133	1132	1127	1121	1119	1121	1123	1126	1133	1138	1144	1140	1139	1137	1133	1137	1136	1140	1135	1137	1137
1102	1105	1116	1115	1114	1114	1119	1119	1120	1111	1111	1114	1118	1117	1118	1120	1120	1124	1130	1132	1130	1127	1125	1116	1120	1120	1121	1121	1119	1119
1063	1067	1073	1073	1077	1075	1084	1083	1090	1086	1086	1087	1087	1091	1092	1090	1091	1100	1103	1106	1106	1105	1104	1103	1102	1101	1099	1099	1098	1099
0	1132	1132	1134	1131	1134	1141	1135	1128	1124	1121	1121	1121	1123	1125	1129	1139	1131	1135	1130	1126	1128	1132	1141	1140	1140	1138	0	0	0
976	982	976	978	989	989	996	1005	1014	1008	1010	1013	1007	1002	1001	1004	997	995	1008	1013	1018	1019	1021	1022	1015	1007	1005	1007	1004	1005
956	956	958	963	965	965	962	973	983	983	991	988	989	982	986	991	984	985	988	996	1001	1006	1006	1000	999	992	990	988	1000	997
968	968	969	982	981	985	997	1004	1010	1015	1022	1020	1023	1033	1029	1029	1021	1017	1017	1017	1023	1020	1017	1031	1028	1031	1028	1025	1023	1015
938	929	928	941	939	942	953	971	970	979	979	983	978	984	983	981	983	976	972	974	974	985	983	989	987	986	978	982	978	976
992	994	1010	1015	1022	1023	1032	1039	1038	1031	1031	1032	1034	1032	1027	1027	1028	1024	1020	1015	1026	1030	1033	1032	1031	1028	1019	1021	1019	1012
0	0	1098	1099	1109	1110	1119	1122	1121	1128	1135	1146	1138	1142	1141	1144	1144	1142	1144	1139	1139	1134	1132	1134	1135	1135	1129	1125	1122	1119
1098	1105	1113	1120	1124	1121	1120	1123	1123	1115	1122	1125	1128	1133	1132	1127	1128	1124	1124	1116	1118	1114	1111	1118	1116	1115	1104	1105	1102	1096
1073	1080	1083	1082	1086	1089	1095	1098	1100	1102	1106	1107	1100	1105	1105	1103	1102	1096	1093	1089	1092	1093	1088	1088	1087	1093	1088	1079	1072	1069
1089	1096	1097	1101	1101	1099	1103	1105	1109	1115	1121	1123	1122	1117	1129	1119	1112	1119	1119	1108	1109	1115	1107	1111	1113	1113	1114	1114	1110	1113
1143	1146	1149	1149	1149	1152	1155	1156	1159	1159	1164	1167	1167	1167	1167	1172	1169	1170	1169	1163	1159	1158	1162	1163	1163	1161	1162	1162	1167	1168
1118	1124	1126	1118	1129	1128	1132	1133	1134	1142	1145	1147	1152	1146	1146	1146	1146	1146	1146	1146	1143	1143	1143	1143	1144	1144	1146	1146	1147	1150
1081	1082	1085	1088	1094	1098	1095	1099	1102	1112	1116	1118	1112	1117	1108	1111	1113	1110	1108	1112	1110	1112	1107	1110	1113	1112	1115	1116	1118	1119
1121	1120	1121	1122	1123	1125	1125	1129	1134	1130	1132	1132	1131	1132	1132	1132	1133	1134	1134	1134	1134	1131	1133	1132	1132	1131	1131	1132	1132	1132
1141	1135	1135	1136	1137	1139	1139	1150	1143	1151	1144	1145	1146	1148	1149	1149	1151	1150	1150	1149	1148	1149	1150	1151	1151	1150	1150	1150	1150	1149
1124	1120	1121	1122	1121	1120	1120	1121	1124	1123	1126	1127	1128	1130	1131	1131	1131	1131	1129	1131	1132	1134	1133	1136	1135	1137	1138	1139	1140	1139
1111	1110	1111	1112	1112	1112	1112	1111	1116	1111	1108	1107	1105	1105	1104	1105	1105	1107	1106	1106	1108	1110	1113	1112	1114	1113	1114	1113	1113	1113
1096	1099	1099	1095	1095	1095	1098	1099	1099	1096	1094	1096	1095	1095	1093	1096	1093	1093	1093	1093	1094	1094	1094	1095	1097	1097	1097	1097	1097	1097
963	969	960	961	961	960	958	958	959	963	961	976	984	986	990	994	995	995	999	998	997	996	993	994	994	994	994	994	993	990
963	969	960	961	961	960	958	958	959	963	961	976	984	986	990	994	995	995	997	994	986	984	980	984	991	990	980	987	986	984
1081	1086	1080	1083	1081	1081	1085	1085	1090	1097	1103	1103	1105	1108	1108	1106	1099	1100	1100	1100	1100	1096	1094	1098	1098	1095	1095	1095	1098	1100
1048	1055	1055	1054	1052	1052	1054	1063	1067	1067	1068	1069	1071	1071	1074	1076	1076	1077	1079	1081	1076	1075	1073	1071	1073	1074	1074	1075	1075	1075
1069	1070	1070	1071	1069	1070	1068	1061	1068	1070	1066	1066	1063	1064	1067	1069	1068	1069	1070	1072	1073	1072	1070	1068	1068	1069	1070	1071	1071	1071
1095	1096	1096	1097	1096	1096	1097	1101	1099	1099	1099	1098	1100	1102	1103	1103	1103	1103	1105	1104	1105	1113	1107	1109	1109	1110	1111	1112	1112	1111
1082	1083	1083	1082	1082	1079	1080	1085	1079	1086	1085	1084	1090	1091	1090	1096	1097	1101	1101	1101	1102	1102	1102	1107	1107	1108	1101	1102	1108	1103
1107	1107	1107	1107	1104	1102	1104	1104	1103	1104	1104	1103	1102	1101	1109	1109	1109	1109	1109	1111	1111	1111	1119	1119	1119	1119	1119	1119	1119	1119
1083	1083	1083	1086	1087	1087	1088	1085	1087	1086	1086	1088	1086	1087	1087	1087	1088	1088	1089	1090	1088	1094	1094	1094	1100	1099	1094	1098	1098	1098
1056	1062	1060	1061	1062	1062	1063	1056	1056	1054	1056	1060	1058	1063	1064	1062	1060	1058	1051	1051	1051	1052	1057	1063	1064	1064	1057	1057	1063	1062
1056	1057	1056	1055	1055	1060	1062	1054	1056	1057	1056	1062	1063	1061	1060	1060	1062	1059	1061	1064	1064	1066	1069	1068	1066	1066	1063	1062	1060	1059
1025	1024	1023	1023	1023	1024	1025	1029	1029	1027	1025	1032	1029	1035	1037	1032	1031	1032	1036	1033	1038	1038	1041	1040	1038	1039	1041	1043	1041	1039
1042	1043	1042	1042	1042	1043	1044	1044	1043	1043	1045	1044	1044	1045	1048	1050	1050	1050	1050	1050	1050	1053	1057	1059	1060	1062	1060	1060	1057	1060
1030	1036	1037	1037	1037	1035	1037	1034	1034	1034	1036	1033	0	1037	0	1045	1043	1034	1034	1034	1043	1044	1046	1044	1044	1044	1050	1045	1045	1050
1010	1013	1013	1013	1014	1017	1017	1017	1016	1013	1012	1016	1020	1020	1022	1019	1019	1014	1014	1016	1020	1019	1023	1023	1027	1027	1024	1024	1025	1032
1020	1022	1017	1017	1017	1015	1015	1015	1019	1022	1024	1028	1027	1024	1025	1027	1029	1029	1031	1034	1034	1033	1033	1032	1032	1035	1036	1038	1043	1041
1008	1010	1014	1017	1014	1015	1007	1016	1025	1029	1026	1031	1033	1036	1038	1036	1038	1038	1038	1036	1037	1036	1030	1026	1031	1030	1036	1037	1037	1041
1052	1055	1059	1058	1063	1059	1059	1065	1072	1078	1077	1088	1083	1082	1080	1078	1078	1076	1074	1073	1072	1074	1072	1073	1074	1073	1073	1071	1071	1070
1036	1037	1037	1040	1041	1042	1048	1051	1059	1065	1069	1076	1071	1072	1069	1069	1068	1068	1066	1066	1064	1059	1054	1052	1055	1057	1056	1059	1061	1060
998	1008	1007	1011	1011	1019	1015	1017	1023	1030	1034	1037	1038	1041	1040	1040	1039	1038	1038	1037	1036	1030	1027	1035	1033	1034	1037	1038	1040	1041
974	976	967	966	962	963	963	967	976	982	984	988	991	991	994	988	988	980	980	983	986	989	988	988	990	990	995	996	999	1002
1024	1029	1024	1025	1032	1037	1035	1039	1040	1045	1050	1052	1054	1054	1054	1054	1052	1052	1052	1052	1050	1046	1046	1046	1049	1049	1049	1044	1042	1046
1003	1006	1008	1008	1007	1006	1006	1009	1022	1026	1028	1028	1029	1029	1032	1030	1031	1030	1025	1023	1025	1018	1020	1017	1020	1027	1023	1022	1020	1022
985	990	995	992	991	998	1005	1008	1014	1012	1013	1009	1008	1012	1011	1006	1013	1007	1000	999	995	987	994	998	1004	1006	1000	996	997	995
955	959	966	963	969	972	981	993	993	997	1001	1007	1004	1008	1007	1004	1006	999	992	987	990	991	994	999	1000	996	989	987	988	987
988	993	998	993	997	994	999	1009	1009	1014	1019	1023	1023	1020	1022	1022	1023	1023	1030	1040	1043	1048	1047	1047	1044	1040	1040	1040	1040	1041
1034	1033	1042	1044	1044	1046	1050	1051	1045	1047	1052	1052	1053	1053	1053	1056	1054	1057	1063	1071	1066	1065	1065	1065	1063	1062	1062	1062	1064	1067
1403	1406	1415	1420	1423	1424	1427	1427	1427	1431	1433	1441	1446	1446	1448	1450	1444	1444	1450	1459	1465	1466	1467	1468	1480	1461	1459	1452	1450	1450
1389	1395	1400	1404	1407	1404	1405	1410	1406	1406	1409	1414	1415	1415	1417	1422	1415	1415	1423	1428	1437	1442	1433	1430	1426	1423	1423	1417	1415	1412
1386	1394	1390	1391	1391	1396	1394	1397	1396	1396	1396	1398	1398	1400	1403	1400	1398	1402	1402	1403	1415	1417	1414	1415	1411	1405	1398	1393	1392	1393
1355	1360	1365	1366	1366	1368	1370	1371	1371	1371	1371	1372	1375	1379	1380	1380	1379	1373	1373	1374	1378	1385	1385	1389	1378	1373	1373	1369	1365	1367
1343	1349	1352	1355	1358	1358	1367	1367	1367	1358	1358	1361	1360	1364	1365	1365	1364	1364	1362	1362	1364	1366	1367	1367	1365	1364	1356	1355	1355	1355
1364	1367	1369	1373	1377	1378	1379	1383	1383	1386	1380	1386	1386	1390	1392	1392	1392	1390	1389	1396	1401	1402	1400	1399	1396	1390	1386	1384	1384	1385
1331	1329	1331	1333	1336	1338	1341	1343	1343	1343	1344	1339	1345	1347	1345	1345	1345	1344	1337	1334	1353	1351	1351	1351	1351	1349	1345	1344	1341	1341
1313	1313	1314	1319	1324	1330	1336	1341	1342	1343	1340	1352	1349	1350	1350	1351	1351	1352	1359	1359	1363	1364	1362	1361	1363	1361	1356	1354	1351	1352
1301	1302	1303	1305	1308	1311	1315	1318	1320	1323	1324	1325	1324	1326	1326	1326	1326	1326	1328	1332	1337	1340	1340	1338	1338	1336	1333	1330	1329	1329
1264	1264	1264	1266	1269	1272	1272	1273	1274	1281	1277	1280	1288	1291	1291	1294	1291	1293	1294	1295	1303	1306	1305	1302	1299	1300	1293	1291	1291	1292
1263	1262	1261	1262	1263	1263	1265	1267	1270	1271	1286	1280	1281	1285	1286	1289	1290	1291	1292	1293	1302	1310	1312	1309	1308	1303	1299	1289	1289	1288
1252	1247	1247	1249	1248	1249	1253	1254	1255	1249	1254	1259	1260	1262	1265	1265	1268	1268	1273	1280	1290	1296	1297	1284	1275	1273	1271	1271	1272	1272
1231	1234	1230	1235	1238	1238	1238	1238	1238	1236	1238	1243	1238	1237	1239	1240	1241	1248	1245	1260	1267	1262	1273	1266	1262	1257	1257	1251	1257	1257
1246	1248	1247	1248	1249	1250	1252	1253	1254	1259	1255	1267	1265	1269	1266	1266	1263	1260	1259	1257	1261	1263	1264	1265	1265	1265	1259	1251	1249	1247
1221	1218	1215	1215	1219	1215	1215	1214	1214	1213	1219	1213	1213	1214	1214	1214	1214	1215	1215	1215	1219	1213	1216	1220	1213	1214	1213	1212	1210	1209
1226	1226	1222	1223	1230	1226	1230	1235	1237	1228	1232	1233	1233	1236	1233	1236	1235	1239	1242	1240	1247	1256	1255	1252	1252	1246	1243	1241	1239	1239
1232	1235	1236	1238	1239	1239	1241	1242	1244	1247	1246	1247	1248	1250	1251	1252	1254	1254	1255	1257	1268	1265	1267	1268	1268	1260	1256	1255	1252	1251
1161	1160	1161	1162	1162	1161	1161	1164	1164	1165	1164	1162	1160	1165	1167	1168	1168	1168	1167	1169	1170	1173	1173	1172	1172	1172	1172	1172	1173	1171
1138	1138	1138	1133	1132	1134	1134	1134	1133	1134	1134	1136	1137	1136	1137	1138	1138	1139	1140	1141	1141	1142	1147	1146	1148	1144	1142	1144	1143	1143
1193	1195	1193	1195	1198	1201	1201	1199	1203	1197	1198	1203	1201	1205	1205	1205	1206	1208	1211	1212	1217	1222	1226	1224	1222	1221	1220	1218	1216	1215
1188	1187	1186	1186	1187	1187	1187	1186	1185	1187	1187	1187	1186	1187	1188	1189	1188	1188	1189	1191	1194	1200	1204	1204	1202	1199	1200	1196	1195	1195
1163	1161	1160	1160	1161	1160	1159	1160	1161	1159	1160	1159	1159	1160	1162	1162	1163	1163	1164	1165	1171	1171	1173	1174	1173	1173	1173	1172	1170	1169
1196	1196	1195	1194	1193	1193	1194	1193	1194	1193	1193	1194	1194	1195	1195	1196	1195	1197	1198	1198	1197	1200	1200	1201	1200	1195	1194	1195	1194	1193
1203	1204	1197	1196	1196	1195	1196	1196	1195	1194	1191	1191	1194	1196	1196	1197	1196	1194	1195	1193	1195	1198	1196	1191	1192	1191	1189	1189	1186	1186
1198	1203	1201	1200	1201	1198	1198	1199	1198	1199	1200	1201	1202	1205	1206	1207	1208	1207	1208	1209	1215	1215	1214	1215	1221	1213	1210	1207	1205	1206
1206	1205	1205	1207	1209	1210	1212	1212	1213	1212	1211	1215	1213	1214	1219	1218	1220	1212	1218	1219	1221	1225	1224	1222	1216	1211	1206	1201	1204	1199
1165	1157	1162	1161	1162	1158	1161	1161	1161	1161	1161	1165	1163	1163	1165	1166	1167	1170	1172	1172	1172	1172	1172	1174	1172	1170	1169	1166	1168	1168
1173	1179	1175	1174	1172	1169	1165	1166	1166	1165	1164	1164	1162	1163	1162	1160	1159	1160	1159	1157	1163	1162	1160	1161	1157	1159	1158	1157	1156	1154
1174	1176	1170	1172	1173	1174	1174	1177	1180	1175	1180	1171	1170	1178	1175	1176	1176	1177	1178	1178	1182	1186	1182	1181	1172	1171	1173	1174	1173	1172
1141	1142	1142	1141	1140	1140	1139	1136	1136	1138	1137	1131	1132	1131	1128	1125	1124	1124	1125	1126	1128	1126	1125	1126	1126	1126	1127	1129	1127	1125
1126	1126	1129	1129	1127	1127	1127	1124	1117	1118	1124	1120	1120	1119	1122	1126	1125	1120	1122	1122	1122	1118	1132	1125	1122	1124	1123	1124	1127	1125
1122	1119	1117	1117	1116	1117	1116	1114	1112	1111	1111	1113	1114	1114	1114	1113	1111	1113	1112	1110	1112	1110	1110	1109	1109	1108	1108	1108	1105	1104
1132	1135	1128	1128	1123	1122	1124	1123	1123	1123	1123	1122	1122	1122	1121	1121	1119	1113	1113	1113	1113	1117	1118	1118	1118	1117	1117	1117	1117	1115
1141	1139	1134	1134	1133	1133	1128	1128	1128	1129	1129	1128	1128	1128	1130	1130	1138	1139	1137	1136	1136	1138	1138	1138	1138	1133	1133	1133	1129	1123
1130	1133	1133	1131	1128	1126	1126	1126	1126	1126	1126	1125	1125	1125	1120	1120	1120	1120	1121	1121	1121	1121	1121	1114	1120	1126	1126	1124	1120	1117
1112	1113	1113	1113	1112	1111	1108	1108	1108	1107	1107	1107	1107	1103	1103	1100	1099	1100	1100	1102	1100	1101	1101	1104	1104	1104	1104	1104	1103	1102
1095	1099	1098	1096	1097	1095	1095	1094	1096	1096	1091	1093	1096	1102	1099	1107	1100	1101	1099	1099	1099	1099	1092	1093	1092	1087	1092	1094	1095	1095
1086	1089	1088	1087	1088	1089	1087	1085	1085	1085	1084	1086	1086	1087	1087	1088	1088	1088	1088	1088	1089	1090	1091	1090	1090	1091	1090	1092	1094	1095
1060	1059	1059	1060	1060	1060	1059	1059	1055	1055	1057	1059	1059	1060	1060	1061	1059	1059	1060	1060	1061	1061	1061	1061	1060	1061	1061	1062	1063	1065
1053	1049	1046	1050	1051	1053	1050	1052	1053	1052	1054	1059	1057	1057	1055	1055	1054	1054	1052	1052	1055	1054	1049	1051	1055	1055	1054	1054	1056	1054
1050	1051	1045	1044	1040	1043	1043	1045	1045	1052	1048	1044	1046	1050	1051	1047	1040	1042	1043	1043	1041	1040	1042	1042	1039	1044	1042	1043	1045	1044
1072	1069	1064	1063	1061	1062	1064	1065	1065	1062	1064	1064	1067	1071	1070	1070	1070	1071	1071	1070	1066	1061	1061	1062	1066	1070	1070	1071	1070	1068
1070	1068	1067	1067	1066	1064	1067	1067	1067	1068	1066	1068	1065	1064	1065	1064	1062	1062	1066	1063	1064	1061	1062	1064	1059	1063	1064	1064	1060	1059
1040	1034	1041	1041	1046	1042	1044	1037	1044	1046	1043	1041	1044	1043	1048	1042	1039	1040	1038	1040	1045	1046	1046	1048	1048	1054	1058	1053	1054	1048
1023	1019	1011	1011	1012	1013	1013	1014	1015	1015	1015	1016	1019	1019	1020	1008	1014	1010	1003	1003	1008	1010	1008	1013	1013	1013	1011	1013	1018	1019
998	996	993	996	1000	990	990	993	992	992	993	998	993	995	996	995	995	991	989	991	993	993	992	994	996	995	996	996	999	996
976	977	970	970	970	970	970	970	970	970	970	970	0	970	971	971	971	971	970	968	970	970	970	971	971	973	979	981	984	985
985	984	982	976	976	975	972	973	976	981	982	982	979	979	980	979	979	980	978	986	989	989	988	988	988	989	998	1000	994	993
948	948	942	941	937	937	938	934	934	934	936	938	943	943	947	948	948	948	948	948	950	950	950	949	950	951	957	958	960	961
936	932	933	932	932	934	935	933	935	935	937	939	939	940	938	937	937	936	937	937	933	927	927	922	927	933	938	944	941	940
919	913	913	914	913	912	916	915	914	908	912	916	918	921	922	923	923	923	923	923	923	923	923	920	919	919	925	933	933	931
911	914	903	912	903	894	894	902	905	911	913	918	911	917	926	919	909	906	901	902	906	903	905	899	899	900	902	906	907	906
913	919	920	925	926	925	924	921	912	920	922	923	932	936	941	946	950	952	955	952	951	948	946	941	937	942	941	945	947	947
1015	1015	1016	1018	1016	1015	1012	1016	1015	1013	1017	1020	1021	1025	1027	1029	1029	1027	1028	1030	1030	1032	1034	1033	1032	1033	1028	1029	1027	1026
905	910	898	900	898	903	895	898	897	899	897	908	910	905	911	907	904	901	902	896	892	891	894	888	892	884	883	887	896	887
921	922	921	922	923	926	926	919	919	913	918	921	928	928	928	928	931	933	933	934	937	938	935	934	938	939	939	935	935	935
952	958	956	956	956	955	951	948	944	944	946	961	967	973	979	980	982	978	978	978	978	977	977	981	981	981	980	979	973	973
952	959	960	962	965	963	958	958	958	958	956	968	975	976	975	982	982	983	979	982	982	981	980	976	977	978	978	977	977	975
985	992	987	993	993	993	990	988	987	986	989	995	994	997	1001	1000	993	996	991	991	992	997	997	1000	1000	1002	1002	1003	1003	1003
962	968	969	969	971	973	973	970	968	960	959	961	970	970	976	975	970	970	970	974	971	977	975	977	979	982	984	985	985	985
957	965	968	969	970	969	969	974	971	966	966	974	977	980	978	976	977	978	977	979	978	980	982	981	983	984	987	986	988	986
941	945	945	947	945	936	936	935	944	945	954	957	964	967	960	955	951	950	950	953	955	950	956	963	966	968	964	966	963	963
960	960	959	964	966	967	970	972	985	989	988	987	996	1004	1004	999	999	994	994	995	996	990	986	989	995	999	998	989	996	1003
965	972	979	978	972	971	971	970	989	991	995	995	994	998	1002	998	997	995	991	995	997	989	989	990	991	995	998	1004	1005	1007
955	961	956	955	952	945	945	947	951	961	970	970	968	976	977	970	968	961	961	964	970	971	970	971	971	970	970	977	978	979
904	913	907	901	903	901	902	903	911	921	927	931	922	926	929	929	922	922	922	925	926	931	926	924	926	928	932	931	931	931
899	896	891	883	884	882	892	895	904	921	927	919	915	921	922	923	920	916	916	914	915	917	913	916	921	922	918	916	926	929
879	880	881	871	869	863	875	881	890	901	907	898	906	898	902	911	909	904	900	898	897	896	904	898	899	899	900	900	903	901
909	907	904	907	911	913	912	911	922	921	932	933	933	932	933	935	933	933	934	943	949	954	952	951	949	947	946	946	946	947
952	954	958	958	961	960	964	967	972	981	988	995	996	996	996	995	992	996	996	1005	1017	1024	1020	1015	1015	1011	1012	1012	1015	1017
852	861	863	862	861	862	865	860	868	874	876	883	881	881	881	880	880	879	878	882	888	894	897	904	903	903	901	901	901	902
883	883	883	883	885	888	888	893	884	912	908	912	912	910	909	911	907	907	907	918	923	928	931	931	930	929	929	929	928	929
927	927	929	929	928	930	928	942	950	945	964	963	964	966	965	965	963	963	967	974	978	983	982	982	982	979	979	979	980	980
912	910	911	912	911	927	920	935	937	942	947	951	954	955	954	954	951	952	959	967	965	967	964	964	964	961	961	961	961	961
918	912	914	922	926	924	934	942	951	964	960	962	962	971	963	965	964	962	961	969	973	972	980	975	973	970	969	967	967	967
894	896	895	897	901	904	910	920	929	938	946	947	945	946	949	949	949	946	944	951	956	960	962	960	961	960	956	954	955	956
922	921	923	924	931	929	932	942	952	962	966	964	954	951	951	953	953	953	953	960	966	972	970	968	968	964	964	964	963	957
896	897	898	899	904	904	904	912	922	932	926	0	0	0	0	0	0	923	923	925	930	942	938	938	939	938	936	936	934	935
878	885	883	886	890	891	899	910	912	919	920	918	919	920	920	919	913	913	914	915	926	931	933	934	937	935	934	933	934	934
878	879	880	882	886	896	897	901	907	908	915	919	920	918	920	919	919	919	920	930	926	933	933	933	932	930	928	928	927	927
872	877	882	887	888	892	892	900	910	912	916	919	917	912	919	921	923	911	908	908	917	924	927	929	923	926	920	913	916	916
889	882	896	895	895	893	904	910	918	923	923	928	921	922	921	920	919	919	914	918	919	919	920	920	919	918	914	911	907	906
868	865	881	880	878	877	878	893	904	905	912	919	915	919	918	919	918	910	904	895	899	903	903	910	912	912	908	899	899	894
844	849	855	860	862	857	863	867	879	885	893	885	886	891	895	896	892	887	882	878	885	876	880	882	876	876	876	876	873	870
849	846	849	847	844	840	841	846	838	867	881	876	871	874	876	880	877	876	871	866	868	868	870	868	869	869	868	869	871	870
841	839	835	829	829	826	834	834	850	853	867	860	857	860	862	864	862	859	857	855	853	855	849	850	849	850	850	849	849	848
850	854	853	847	844	844	839	837	842	855	861	861	863	863	862	861	861	860	859	863	863	862	862	862	859	858	856	858	858	858
874	879	884	884	879	876	876	870	868	868	878	884	885	884	886	886	884	884	881	883	885	888	884	884	884	884	886	887	884	880
842	845	847	846	846	846	848	849	858	859	869	874	878	879	879	882	881	881	879	881	887	893	891	892	889	890	886	890	888	890
846	847	847	849	849	854	854	860	864	873	883	889	890	889	890	888	887	890	890	889	894	901	901	900	898	898	897	895	895	895
855	861	861	861	862	871	871	879	894	907	911	919	916	913	911	910	910	907	906	909	917	927	926	921	921	919	917	915	916	916
841	837	836	837	838	838	840	851	849	871	869	875	873	869	870	864	862	860	859	860	867	868	871	871	872	871	869	869	868	869
836	839	841	842	843	843	845	842	838	834	839	846	839	840	842	842	842	842	846	846	840	837	837	839	841	837	834	830	834	834
871	871	873	870	876	878	877	876	871	873	871	879	877	879	884	886	886	887	889	887	887	886	887	889	888	887	886	886	884	882
840	842	846	849	850	849	853	842	840	839	840	846	847	850	850	853	853	854	860	860	861	861	861	859	859	858	858	858	858	857
855	857	858	858	858	862	859	861	858	853	853	854	862	866	866	865	865	865	867	870	870	870	870	870	870	870	870	868	0	867
853	852	851	851	855	845	848	847	840	849	849	864	870	870	870	866	870	867	868	868	873	874	874	875	875	874	876	877	878	878
818	821	820	820	811	812	804	804	808	814	826	834	834	834	834	834	832	830	828	829	830	830	830	831	831	826	826	825	825	823
810	814	819	819	819	813	813	815	819	827	835	835	837	844	844	847	846	845	842	837	836	836	839	839	839	838	837	842	841	839
797	801	806	809	811	803	807	816	821	821	832	827	827	832	834	833	831	829	823	817	816	826	826	820	821	819	815	816	817	816
808	808	807	808	809	808	807	807	810	813	818	824	825	827	827	831	825	823	822	821	826	829	831	833	834	834	833	834	832	835
812	810	810	810	810	814	813	813	818	825	829	832	838	836	836	835	835	835	835	838	838	846	853	856	857	857	857	856	855	857
794	799	805	809	809	812	813	818	818	830	838	846	848	848	849	846	847	848	849	852	853	855	862	859	857	856	858	852	850	850
817	819	819	820	820	817	819	822	845	853	859	859	858	854	854	857	857	857	856	856	861	862	868	871	871	871	866	861	861	862
784	787	788	786	786	789	789	790	791	799	803	810	813	812	812	812	810	810	810	809	809	809	815	817	815	815	815	819	821	821
767	767	767	767	769	770	771	771	773	777	782	777	790	792	789	790	785	792	790	790	790	788	788	792	792	791	788	791	791	792
776	776	775	775	777	774	774	783	780	785	791	797	792	797	798	798	791	792	794	794	793	802	800	800	800	800	795	795	800	800
749	748	750	747	749	753	756	755	762	766	774	776	767	778	779	780	780	779	779	779	779	785	784	784	782	782	778	780	780	780
729	732	733	733	732	731	734	737	741	749	758	763	764	765	767	767	766	766	767	769	771	774	775	774	770	768	764	759	759	763
722	722	723	725	725	728	731	731	736	744	748	758	762	764	764	764	763	762	763	764	763	770	769	770	771	771	770	771	770	770
757	760	763	763	763	763	763	763	763	772	782	788	791	794	797	791	792	792	794	797	797	802	806	811	814	814	813	810	812	812
779	781	782	785	790	783	785	789	797	805	814	819	826	827	827	827	825	825	824	824	824	827	827	827	830	830	830	829	829	830
789	790	792	792	792	791	790	795	795	816	827	833	833	829	823	819	819	817	816	813	811	811	810	813	819	819	818	817	818	812
767	758	765	769	772	770	772	773	793	803	796	803	810	808	811	812	810	808	806	808	809	808	812	814	814	813	814	814	814	814
796	795	796	797	800	799	806	809	816	819	819	819	819	820	820	821	821	815	808	815	815	819	819	820	820	819	812	811	812	813
812	814	814	817	821	822	825	834	837	844	841	844	841	842	849	843	847	849	847	846	845	848	853	859	856	853	849	849	849	853
812	811	807	809	813	813	816	819	823	833	833	838	836	836	833	835	832	831	828	834	834	838	842	849	848	846	844	844	844	847
783	779	778	778	783	787	785	789	798	806	812	816	816	814	812	812	808	802	802	803	804	811	818	823	816	813	812	812	812	815
775	780	788	787	779	775	784	782	785	799	812	810	809	813	810	803	807	800	793	791	793	790	799	801	792	795	797	795	797	797
777	776	787	785	792	788	794	798	807	809	811	815	816	824	824	820	814	811	806	809	818	820	818	819	814	812	811	810	810	809
754	762	768	774	776	771	770	773	784	789	794	802	800	806	805	797	795	794	791	793	791	797	797	800	797	797	796	796	796	791
761	768	774	772	768	772	774	772	778	777	789	788	781	789	791	785	783	781	780	774	772	773	775	780	773	771	772	774	776	775
775	782	786	784	784	781	785	785	786	795	803	799	803	814	816	816	813	819	820	815	815	808	812	813	808	809	813	810	805	806
782	783	780	778	777	777	773	777	783	784	790	792	795	800	801	801	801	800	801	804	803	804	804	801	799	797	795	794	794	793
787	784	783	777	777	776	771	772	778	783	789	788	789	791	792	790	788	785	788	788	788	782	782	782	783	788	785	785	781	782
815	814	814	814	819	816	818	819	817	816	826	835	840	840	840	838	838	836	836	836	837	837	839	839	839	839	839	841	841	841
784	784	783	783	784	784	781	781	781	787	797	807	808	808	810	810	810	809	807	807	807	807	807	808	813	814	814	814	810	810
801	804	808	804	804	798	801	801	797	796	796	802	811	813	813	814	814	812	812	813	815	816	816	817	817	816	812	812	812	813
804	804	812	812	812	804	808	810	802	801	800	802	804	804	805	806	806	805	806	807	807	809	810	810	810	810	810	810	810	808
754	756	757	758	758	758	759	761	766	769	772	773	774	776	778	777	773	770	769	769	770	774	776	779	778	778	778	779	781	782
752	754	750	752	754	756	756	756	770	780	783	781	781	782	781	780	777	776	775	784	775	778	779	784	783	780	782	783	784	785
723	733	736	738	737	730	731	728	733	744	746	742	743	747	747	744	742	742	737	732	726	731	736	736	736	731	729	730	731	729
742	744	752	749	754	754	755	755	757	758	757	764	771	770	781	779	781	778	778	774	778	779	783	783	778	781	776	774	774	773
806	812	816	816	810	810	808	802	798	795	799	804	807	807	807	805	804	804	804	799	799	798	796	794	794	791	791	786	786	786
792	796	796	798	799	797	797	797	796	795	801	807	807	809	810	810	810	810	810	814	814	810	810	808	807	805	800	797	799	798
769	769	769	769	771	769	764	766	767	766	770	777	780	781	781	783	783	778	779	780	782	782	782	780	780	777	773	773	773	773
739	740	740	737	737	732	730	730	731	732	734	739	743	748	749	749	749	749	749	750	750	750	750	750	751	751	751	751	751	750
716	713	713	713	713	713	713	711	709	707	707	709	711	724	727	727	726	723	719	721	721	721	719	717	717	720	721	718	717	714
753	752	748	748	748	748	747	747	747	747	747	749	749	754	758	758	758	758	758	759	759	759	756	756	756	756	756	756	756	756
761	763	766	766	766	765	762	764	763	763	769	775	775	775	775	775	773	771	771	771	767	767	767	770	770	774	774	776	778	778
768	769	769	769	768	764	762	762	762	762	766	775	775	776	778	777	775	775	775	775	776	776	777	783	784	784	784	784	784	784
729	730	732	734	734	734	728	727	733	737	742	741	738	740	735	736	735	736	737	736	736	736	737	740	741	742	740	743	743	742
751	754	754	747	747	747	745	743	743	747	755	760	759	759	759	759	758	756	756	755	755	754	754	756	756	756	756	755	755	753
724	722	722	721	722	720	722	718	719	723	722	727	728	728	729	732	731	731	731	731	732	733	736	737	737	736	737	736	735	736
734	737	741	745	747	747	741	741	741	746	747	746	746	750	752	753	753	754	753	753	752	754	755	758	758	758	759	758	758	760
685	687	692	694	691	691	687	687	687	688	693	696	699	699	699	699	699	699	699	699	698	698	699	702	704	706	708	708	708	709
713	711	713	714	716	714	715	715	715	715	731	724	726	729	730	732	732	733	734	733	733	734	736	737	737	738	736	735	734	733
696	703	705	707	706	703	704	702	705	709	713	713	709	713	716	716	717	717	718	717	715	717	721	721	721	719	719	719	719	718
690	689	690	691	692	691	690	698	694	694	700	703	704	706	706	709	708	710	710	710	710	710	712	715	711	713	713	711	713	714
720	722	724	726	725	724	724	727	734	740	745	747	748	750	751	748	746	743	741	739	741	744	747	744	744	744	744	745	745	746
717	713	717	715	716	717	718	719	733	742	739	746	750	747	752	748	748	745	747	748	747	748	755	756	758	759	757	758	759	761
694	697	697	699	701	702	701	705	704	712	720	726	728	730	730	731	729	724	724	726	727	727	733	734	737	738	739	741	740	743
732	727	724	729	730	724	722	727	732	725	724	738	739	735	732	737	726	725	725	728	730	739	740	732	732	730	740	742	738	746
678	678	680	683	689	690	694	694	702	708	711	719	722	727	728	728	728	727	728	726	726	725	725	723	726	725	728	727	731	729
687	690	683	683	683	683	682	683	683	686	687	693	694	699	697	693	693	696	693	692	689	692	694	694	695	697	698	698	698	697
677	683	685	689	689	687	685	684	687	705	705	715	719	719	714	711	707	706	697	703	704	697	708	705	705	707	711	713	713	714
646	650	656	657	661	658	661	660	663	672	677	683	692	697	693	691	687	683	677	681	678	676	679	680	675	676	676	681	682	677
669	679	685	677	681	673	670	675	682	689	701	705	709	708	715	700	703	707	706	699	695	694	699	708	707	705	706	701	700	693
671	672	673	672	677	676	674	666	675	673	689	686	682	684	683	680	681	678	676	676	675	680	682	684	682	679	677	679	677	678
669	661	672	672	672	669	669	668	670	673	677	680	679	682	679	681	685	683	684	684	682	683	681	684	682	676	677	676	674	676
672	673	673	673	674	676	674	674	674	674	677	680	671	672	678	679	681	682	683	683	683	686	686	686	687	687	687	687	688	688
663	666	668	667	668	665	663	663	665	670	669	668	669	669	667	669	669	669	670	675	670	672	672	673	676	682	682	681	680	678
646	648	646	644	643	642	642	639	641	637	644	646	644	646	645	645	646	648	649	649	649	649	649	649	647	647	650	651	651	654
649	649	649	649	643	638	640	639	637	643	647	649	648	647	648	648	648	648	649	649	649	649	652	651	654	654	654	654	654	654
665	664	664	664	664	663	661	661	661	662	664	667	667	667	670	674	673	673	673	673	673	673	673	676	676	676	672	676	673	676
657	657	657	659	662	662	662	657	657	658	664	668	668	668	672	672	672	671	669	665	664	664	668	668	668	668	669	669	669	669
661	661	665	664	668	669	666	666	664	666	669	670	670	672	678	681	681	681	681	681	682	685	685	688	687	687	687	687	687	687
621	625	623	629	630	628	627	628	628	629	631	639	640	643	641	645	640	645	646	642	643	649	646	656	656	656	655	655	653	649
633	633	631	631	629	629	626	632	632	632	635	640	640	640	642	642	642	643	643	643	643	643	645	646	647	647	647	647	647	647
637	642	640	639	639	639	633	639	639	642	644	649	649	649	649	649	649	649	649	649	649	650	652	652	652	652	655	656	657	657
617	620	626	623	623	622	624	623	627	628	631	632	632	633	632	631	630	630	623	630	630	627	637	632	632	630	630	629	629	628
600	597	611	602	605	603	611	600	613	607	618	624	629	633	633	632	629	628	626	625	625	621	630	632	634	634	635	637	639	641
560	565	572	574	580	583	581	581	582	590	600	602	612	606	607	607	604	600	598	596	592	588	591	594	594	589	589	586	585	584
614	614	615	612	612	611	606	606	607	608	611	619	615	616	617	617	618	618	620	619	621	621	623	619	618	616	618	619	618	620
586	588	588	590	587	590	593	593	595	598	602	605	602	603	602	603	602	601	601	601	601	603	603	608	609	610	610	611	607	599
530	530	529	531	535	530	537	544	542	547	548	549	550	552	554	556	552	552	550	549	551	549	562	561	563	562	559	559	542	541
504	515	501	501	501	507	512	510	515	520	524	520	524	532	527	526	524	528	527	527	528	525	538	538	534	539	542	543	535	534
580	583	584	580	580	580	580	585	585	585	589	593	592	589	595	595	596	596	596	597	599	599	602	606	606	609	609	609	610	610
593	596	598	599	598	598	597	600	600	603	605	611	611	611	614	614	618	618	618	618	618	617	621	621	622	620	620	619	617	617
546	550	546	542	527	537	541	553	550	550	562	567	555	557	562	565	565	565	568	566	556	567	569	570	570	573	574	574	568	577
526	519	529	526	520	520	524	528	535	531	530	529	526	533	540	541	541	546	546	542	544	543	531	539	537	539	545	536	544	535
548	554	554	553	549	546	547	549	553	559	559	558	557	559	561	566	571	569	569	569	571	571	571	574	573	569	570	571	569	572
593	592	593	594	591	587	585	586	589	593	595	600	603	603	608	610	607	607	608	607	608	609	605	604	602	603	605	602	603	605
597	594	600	597	597	597	595	586	584	595	595	597	597	591	592	592	594	594	603	600	604	609	611	615	617	617	618	618	620	621
539	540	541	541	542	541	539	538	537	530	529	529	530	534	537	540	540	542	543	544	549	550	553	555	555	556	558	561	563	566
537	538	539	539	548	542	542	538	538	535	535	535	535	535	540	540	543	543	545	545	547	554	560	558	558	558	558	564	564	564
535	529	530	533	533	525	527	529	530	533	534	535	539	542	537	536	536	536	537	538	540	541	539	539	540	542	543	541	537	536
551	551	551	552	556	552	552	555	554	554	554	553	556	556	559	558	558	558	558	558	562	562	564	563	564	565	565	567	563	563
504	499	502	508	505	506	502	501	503	510	520	515	524	524	521	522	520	520	522	524	527	526	525	524	524	528	528	522	512	513
567	567	568	568	562	562	562	565	566	566	566	567	567	569	570	572	572	573	574	577	578	577	585	586	586	585	586	586	589	586
612	615	621	621	622	619	618	615	616	617	616	616	611	609	610	608	608	609	608	607	613	607	611	618	611	611	611	612	612	612
565	558	556	564	558	558	550	552	552	552	552	558	564	564	549	549	552	550	562	559	555	558	560	558	565	560	558	560	558	558
528	534	533	532	533	533	534	530	530	528	531	524	540	545	534	536	536	536	540	541	542	537	538	545	549	540	549	548	546	547
493	497	496	495	496	495	496	494	493	493	494	496	498	500	501	500	501	499	499	501	502	503	501	501	501	501	502	502	502	501
548	542	547	549	551	547	550	551	553	556	557	567	566	571	573	575	574	575	572	570	574	574	568	573	577	574	577	577	577	576
510	508	508	510	505	502	500	504	507	509	512	517	519	521	521	522	522	522	523	523	526	526	527	530	532	532	532	532	531	529
495	498	498	498	500	502	502	503	506	508	512	517	518	521	522	524	522	521	521	521	521	521	523	524	526	526	526	527	528	528
509	516	515	518	519	519	520	524	528	532	534	540	543	547	550	551	551	551	549	549	550	548	549	550	550	551	552	553	554	555
538	534	540	537	531	535	535	535	540	543	556	558	564	565	569	575	567	594	608	613	616	619	619	619	618	619	619	619	623	623
538	534	540	537	531	535	535	535	540	543	556	558	564	565	569	575	567	565	553	553	547	544	547	550	555	559	559	559	559	559
642	642	642	640	637	639	639	639	640	640	641	647	652	652	652	652	652	652	652	652	652	652	652	652	659	657	657	657	657	657
676	676	695	694	692	692	692	676	676	680	681	682	687	688	690	687	687	690	692	690	691	689	690	691	693	711	710	711	711	712
630	629	629	639	638	627	630	631	630	632	634	637	653	657	654	657	650	640	641	641	639	640	638	639	637	636	636	635	635	634
633	634	637	637	637	637	645	645	650	658	658	671	673	677	681	680	695	679	678	681	681	677	678	678	683	683	682	681	681	679
600	600	602	602	603	602	605	604	606	607	605	611	611	615	616	617	618	618	619	619	617	616	617	617	615	614	614	615	615	616
567	566	567	569	568	571	571	574	575	577	580	582	585	588	589	589	595	597	596	595	595	598	599	600	600	601	602	605	606	605
587	585	590	588	589	589	592	597	611	614	622	623	624	632	637	638	640	640	639	640	640	644	644	642	642	644	644	644	646	644
588	588	593	599	599	586	599	597	606	610	617	621	628	626	626	627	627	629	632	636	638	639	645	639	640	642	642	642	643	642
529	525	525	527	529	531	532	532	531	535	538	545	555	559	565	567	568	570	575	575	580	580	580	581	581	581	581	583	585	585
480	480	481	483	484	486	495	494	493	488	490	497	502	511	517	526	528	527	523	512	521	521	518	518	519	520	520	519	519	519
482	481	481	481	483	483	483	483	483	475	486	491	493	482	495	498	500	501	502	504	503	501	501	502	502	502	503	503	503	502
506	503	504	504	508	509	512	512	510	509	512	516	520	524	530	531	532	532	533	532	532	532	536	538	541	543	543	544	544	543
479	480	482	483	485	487	488	490	488	490	491	494	497	501	502	503	505	506	507	508	509	508	509	511	511	512	511	513	513	513
477	473	477	479	482	482	476	476	475	471	476	487	498	505	512	514	521	522	515	512	507	511	512	520	521	525	532	532	534	538
424	420	422	421	427	433	434	431	430	432	435	440	446	453	465	469	472	476	474	472	468	467	467	467	471	475	478	478	478	478
474	477	477	478	480	480	483	482	484	484	490	494	494	507	510	513	514	514	517	519	517	516	518	520	522	524	523	525	524	523
454	452	455	461	464	465	466	468	465	462	467	470	474	484	492	498	501	504	502	501	502	504	511	512	515	516	515	514	514	511
457	446	446	448	456	453	447	447	453	453	461	471	480	485	490	497	499	506	516	504	499	492	490	490	506	509	510	509	511	511
431	433	435	430	441	439	438	437	436	433	436	446	451	448	454	449	456	451	452	454	452	446	446	446	446	447	447	447	447	448
450	449	446	449	442	443	448	448	447	446	453	455	460	467	467	464	467	467	464	465	464	463	467	467	467	467	463	465	465	463
455	455	453	455	458	460	469	464	465	464	471	476	478	482	484	484	484	484	485	486	486	486	488	491	491	492	492	492	492	491
428	428	438	441	441	442	442	445	441	439	442	446	442	454	457	459	461	462	467	464	456	440	439	442	445	449	451	456	452	455
404	404	408	411	415	416	419	418	420	417	422	424	427	434	440	439	440	445	443	437	433	430	429	430	432	438	438	441	441	441
414	420	424	427	431	429	429	426	434	435	437	444	447	450	452	454	456	454	458	459	460	457	456	456	456	461	461	462	461	462
424	428	430	434	437	437	440	438	439	441	444	452	458	458	459	461	464	464	466	467	467	461	461	463	465	469	470	469	470	470
412	411	414	414	401	416	416	416	416	416	420	424	427	430	430	431	433	429	426	422	419	419	415	400	403	413	418	417	416	412
379	382	383	386	387	388	387	390	391	396	398	404	410	413	415	416	416	417	415	414	414	409	409	410	410	414	415	416	416	418
376	377	373	374	374	373	376	377	381	380	385	399	404	408	410	409	402	406	397	405	399	394	393	401	403	407	408	414	415	415
381	388	390	393	394	393	396	400	401	399	405	412	413	418	425	427	428	433	436	433	431	431	446	434	437	441	447	447	446	443
343	349	355	359	362	361	363	359	367	371	378	385	387	394	399	403	403	405	405	397	394	388	389	391	392	395	396	400	403	402
345	350	350	352	361	361	359	361	363	364	372	377	379	384	391	394	401	400	394	394	394	394	394	395	401	407	410	410	414	409
384	383	398	404	407	410	413	417	423	424	418	419	425	426	428	424	421	417	417	416	416	417	420	420	423	422	425	426	426	428
398	401	403	411	412	412	410	411	413	419	419	423	423	424	428	428	428	428	425	426	424	424	424	425	424	424	424	423	423	421
393	390	391	390	392	390	391	391	393	392	393	394	395	396	396	398	397	393	395	396	394	396	396	398	396	396	396	396	395	393
342	339	340	346	344	346	348	349	352	355	357	359	361	362	361	362	361	356	356	356	355	359	357	358	358	359	358	360	358	357
347	343	351	345	333	332	331	336	339	334	343	335	334	333	333	337	331	343	337	340	344	346	336	338	343	338	339	337	346	342
302	305	311	307	317	325	328	330	330	340	334	334	345	350	347	352	355	353	355	362	366	358	361	362	366	363	364	363	353	357
302	305	311	307	317	325	328	330	330	340	334	334	345	350	347	352	355	353	355	362	366	358	361	362	366	380	379	375	370	370
314	321	327	328	328	334	337	339	344	346	352	352	362	365	365	365	369	364	357	356	358	354	356	358	362	365	367	366	365	365
286	291	286	286	299	302	302	314	314	316	317	314	315	326	334	345	348	336	324	322	322	321	319	320	323	323	328	315	304	315
226	234	229	238	238	243	238	250	250	255	259	257	253	253	262	260	257	258	249	253	264	262	267	265	268	274	276	262	275	278
301	307	303	304	309	307	310	319	326	329	331	334	338	342	347	351	357	360	356	345	337	334	338	342	344	352	352	357	364	364
308	314	318	315	323	323	326	334	334	345	345	349	349	355	359	363	363	360	364	352	350	343	351	351	353	357	361	363	366	366
360	356	357	373	363	356	354	357	364	368	372	377	382	382	383	383	387	390	392	394	390	388	390	388	388	386	388	390	383	381
243	242	240	252	248	260	267	276	286	290	293	297	296	302	305	308	306	292	291	295	296	301	302	303	305	309	306	303	306	309
262	268	268	268	275	275	281	285	291	292	294	300	299	303	304	302	302	288	292	291	291	289	289	297	297	297	295	286	291	295
231	231	231	237	240	245	251	259	260	265	264	267	264	264	267	264	264	258	252	256	254	254	254	254	258	261	261	256	256	258
173	176	184	197	183	193	200	213	206	207	210	210	214	215	214	215	215	210	213	208	212	214	211	207	222	216	209	209	209	211
212	211	218	215	216	222	223	229	232	234	237	243	245	237	240	245	247	244	241	243	245	244	247	243	241	249	247	248	249	253
190	192	194	197	197	207	208	212	213	212	212	212	212	213	214	217	221	221	221	219	220	223	219	221	220	225	226	229	231	232
187	184	186	189	189	194	204	206	208	208	210	206	207	208	207	209	209	210	211	212	213	212	211	209	209	210	209	212	213	214
214	214	214	208	216	218	223	227	232	233	234	236	241	241	241	244	244	240	240	240	240	244	244	244	244	244	242	242	244	244
250	250	250	250	250	254	256	261	261	262	262	264	261	260	256	262	261	263	261	261	264	264	264	265	266	266	267	269	266	262
260	262	254	271	259	254	252	256	268	267	263	272	275	270	275	278	287	287	291	291	288	290	286	287	286	284	285	285	274	279
289	291	298	302	298	286	287	284	289	289	290	290	289	292	286	288	299	301	301	302	301	305	310	308	306	311	308	311	307	298
214	199	207	213	204	200	196	198	201	204	207	210	205	208	212	214	214	219	223	228	231	233	234	234	235	238	238	237	235	231
283	277	282	266	273	273	273	271	273	273	270	273	270	271	274	283	287	290	295	283	280	282	291	292	287	290	291	293	292	290
262	262	262	266	263	264	265	265	266	265	265	265	265	265	264	265	265	267	268	267	268	268	268	269	268	268	268	271	270	270
258	255	259	258	254	252	253	255	255	253	253	253	253	254	254	257	257	260	262	259	259	258	259	260	262	262	265	268	268	266
159	162	168	176	174	178	171	179	182	181	179	184	186	186	185	191	193	192	190	190	189	188	177	177	174	175	187	191	196	197
118	126	139	147	144	149	138	155	148	136	136	139	135	145	145	140	137	136	134	126	117	108	109	109	110	112	115	127	129	138
205	205	205	204	205	211	208	212	214	214	215	216	217	220	218	218	217	218	218	218	216	215	213	212	211	210	210	210	210	209
214	214	215	222	223	229	234	235	239	240	235	239	234	239	233	237	233	236	233	233	236	233	234	231	234	232	232	236	232	232
227	228	228	230	230	233	234	236	234	232	233	230	229	227	225	224	224	224	223	223	224	223	223	223	223	224	225	226	226	225
235	234	238	237	236	235	240	241	239	241	236	233	233	234	226	231	233	233	236	234	230	230	234	235	236	240	242	246	241	234
219	219	227	230	230	229	235	240	237	240	234	237	234	233	231	236	236	239	247	245	245	245	249	249	245	252	254	258	260	260
197	202	207	215	212	209	214	214	215	214	214	211	209	202	203	205	208	214	216	214	215	216	219	224	231	238	235	239	235	226
183	174	179	177	184	180	182	184	186	184	184	181	177	179	178	180	179	178	180	183	180	180	182	185	186	190	194	197	200	197
192	193	192	193	201	203	205	205	202	199	198	197	195	194	194	194	195	195	197	198	196	195	196	202	203	203	205	209	211	210
218	217	217	220	216	218	219	219	219	218	217	216	216	215	216	217	218	218	218	220	221	220	221	223	226	229	229	232	233	231
353	368	357	350	352	354	355	357	359	359	359	361	361	363	364	365	365	366	367	366	366	364	365	366	366	367	366	366	365	362
343	343	361	348	346	347	349	339	338	340	338	351	349	353	353	357	357	357	339	360	360	350	359	359	352	356	353	353	353	352
162	162	161	162	159	170	176	177	179	179	182	184	185	188	189	190	193	194	192	193	192	191	190	190	191	192	192	193	193	191
179	178	179	180	187	187	190	193	195	196	197	199	199	200	201	201	201	202	202	201	201	199	199	198	199	199	200	200	201	199
91	99	108	112	104	110	115	110	116	114	118	118	129	120	116	112	114	112	107	114	110	109	103	109	108	110	126	131	122	130
285	285	292	292	289	0	0	0	0	0	0	0	0	0	0	0	0	0	0	0	0	0	0	0	0	0	0	0	0	0
8	13	16	18	20	21	22	26	24	25	19	16	14	14	21	25	23	10	10	16	18	18	18	17	17	18	27	26	27	29
21	16	21	25	23	27	33	41	42	42	42	42	39	37	32	31	28	28	31	24	32	31	27	22	23	21	25	25	27	27
32	39	42	44	45	41	50	56	60	65	65	63	66	65	62	59	56	48	57	43	59	42	50	45	43	33	41	48	46	46
107	112	113	116	116	117	120	128	141	132	138	132	131	132	129	130	133	133	129	129	136	123	127	128	129	135	135	135	137	146
124	132	132	137	137	139	141	147	141	152	138	132	156	155	154	153	156	159	159	157	154	153	151	149	143	148	152	157	152	158
106	110	112	108	109	112	118	123	123	123	124	122	122	117	113	108	122	126	123	118	114	117	108	106	108	110	110	107	108	111
43	44	39	42	46	54	52	58	61	58	54	53	0	65	68	62	63	66	79	78	78	81	86	78	79	78	74	76	72	61
15	4	8	12	20	15	22	15	15	18	20	27	29	28	26	12	19	17	15	15	18	18	18	18	15	22	21	21	18	16
4	0	5	9	9	9	9	12	12	18	1	18	19	19	19	12	11	11	9	5	6	10	8	7	5	5	5	6	6	5
50	52	55	67	64	70	69	69	71	75	79	79	73	73	73	68	67	67	66	70	71	68	63	57	56	53	58	59	66	73
39	44	45	53	55	57	56	58	59	62	63	64	64	57	63	64	65	65	69	69	69	69	64	64	64	65	73	73	74	80
167	169	170	171	173	173	177	177	178	179	180	181	180	181	181	181	181	183	182	181	180	182	183	184	182	183	184	185	181	184
201	198	198	200	202	204	206	207	207	207	208	209	209	210	209	209	208	208	212	212	212	212	211	208	206	206	211	209	209	208
203	204	201	204	205	205	206	211	212	215	215	215	214	213	214	214	215	215	215	216	216	215	215	214	214	214	215	215	214	214
207	208	204	206	206	208	208	211	212	211	213	212	212	212	211	211	212	211	212	211	211	212	213	213	213	214	215	217	218	218
195	188	193	191	192	194	195	196	196	194	193	192	191	192	191	191	192	191	193	193	193	194	195	197	197	197	199	201	200	200
184	186	185	185	190	187	190	190	190	191	192	192	194	196	193	193	197	196	196	195	195	195	194	184	194	196	196	185	185	196
180	184	184	184	184	186	189	190	192	192	192	190	190	190	190	189	188	188	187	188	189	188	188	187	187	187	186	186	186	185
166	167	168	168	171	173	178	181	182	185	184	184	185	185	185	184	182	182	181	181	181	182	182	182	182	182	182	182	182	183
113	118	114	119	123	123	127	125	127	127	126	125	125	126	125	124	125	124	125	125	125	125	127	128	126	127	130	131	132	131
160	159	158	158	156	155	158	152	151	149	148	147	146	145	143	143	142	143	144	144	144	145	145	145	145	146	146	147	147	147
176	175	175	170	169	175	177	182	182	177	177	175	175	175	175	173	173	173	173	173	173	173	175	175	175	175	175	175	175	175
118	119	118	121	124	131	132	133	131	126	123	123	121	121	121	119	119	120	121	120	120	120	121	122	122	123	124	127	126	126
108	106	106	108	110	112	116	121	120	121	121	122	122	123	124	124	125	125	125	125	125	127	128	128	130	130	132	132	132	128
90	86	86	89	89	91	93	90	90	90	90	89	89	91	92	92	91	93	93	96	95	95	92	93	95	96	98	102	101	100
86	87	90	88	87	92	95	98	98	97	94	93	90	87	87	87	85	85	88	87	87	86	86	87	87	87	91	96	97	96
38	38	37	38	40	48	48	47	46	44	43	41	41	36	33	33	31	32	35	35	36	36	34	35	34	34	34	35	33	33
47	36	34	34	47	43	47	47	46	43	41	40	38	36	35	34	35	35	33	33	31	31	33	34	34	34	36	38	39	38
45	45	44	44	44	44	45	45	46	45	46	45	45	45	46	47	47	48	48	48	48	48	48	51	50	51	53	54	54	54
39	39	37	38	47	49	52	56	49	47	49	51	46	52	56	49	48	50	52	52	55	54	57	55	55	55	57	57	60	60
70	66	66	66	66	71	68	69	70	69	70	70	70	71	69	70	70	68	69	70	70	70	71	72	73	73	73	75	76	76
12	3	1	1	5	6	5	4	8	9	8	8	7	6	5	3	2	5	6	4	5	1	1	1	1	1	1	1	1	1
9	12	9	12	13	13	13	14	14	13	13	13	13	13	13	15	13	19	18	17	16	17	15	14	15	11	9	13	17	12
29	31	30	27	33	32	35	38	40	39	38	35	39	39	41	37	43	36	36	42	42	37	41	41	45	41	38	43	39	38
5	5	7	10	8	9	7	9	3	3	2	3	0	0	0	0	4	5	5	7	7	6	6	14	9	13	8	8	7	9
113	119	118	116	116	116	119	122	122	123	120	122	123	123	123	123	0	123	123	123	127	127	127	128	128	0	128	0	132	132
103	103	104	104	105	106	110	110	109	109	111	111	111	116	116	116	115	115	118	118	117	117	119	117	118	118	120	120	121	121
65	65	66	64	69	74	74	77	76	74	74	70	67	69	68	67	64	63	64	64	64	64	64	64	65	66	66	71	67	67
68	72	71	71	71	74	79	78	77	72	69	68	68	68	66	66	65	65	67	66	66	66	67	67	67	69	69	71	71	68
89	88	89	89	89	89	91	93	93	93	94	94	95	95	97	97	97	97	97	97	97	97	100	103	103	103	104	107	107	107
85	87	87	87	86	88	92	92	92	90	90	89	89	89	88	88	88	91	91	91	91	91	91	92	92	92	93	93	93	93
139	134	132	139	139	144	144	145	133	143	146	146	145	147	146	145	133	143	145	133	150	143	140	142	143	144	152	158	163	166
134	124	128	117	128	130	132	124	124	126	130	125	125	126	123	124	128	133	136	135	139	141	134	135	138	137	135	140	143	140
179	180	182	186	185	194	198	199	197	194	192	190	189	187	185	184	183	182	181	181	183	183	185	186	188	191	195	198	198	197
42	39	40	34	32	28	30	33	32	34	30	31	27	27	28	25	25	27	26	29	33	35	32	33	33	32	28	24	24	24
77	67	69	69	67	70	70	69	68	68	67	65	63	62	61	59	61	62	62	64	67	68	67	69	70	68	66	62	60	63
47	44	43	46	48	52	54	55	50	50	50	50	49	48	48	50	49	49	50	50	50	53	56	56	57	57	61	68	72	72
23	19	16	24	17	19	21	22	21	20	19	19	18	19	21	22	24	23	23	24	26	27	29	30	30	31	28	34	38	39
82	83	83	81	85	91	91	91	87	86	81	81	89	89	88	86	86	86	85	81	81	79	81	83	81	81	86	99	96	96
41	43	39	38	40	49	50	45	46	36	38	41	42	42	48	46	48	48	48	47	46	48	48	48	53	52	52	52	55	58
54	52	50	50	52	54	55	54	55	57	57	56	54	54	53	52	54	56	57	58	59	59	61	62	62	61	60	60	61	63
98	102	101	98	99	100	100	100	99	99	99	99	99	99	99	99	98	99	104	0	115	115	115	115	115	112	112	112	111	111
79	79	79	79	79	86	86	89	81	81	83	83	83	83	83	83	83	86	86	86	87	87	87	96	87	89	91	91	93	93
6	1	1	1	1	8	13	13	12	5	2	1	1	1	1	1	1	1	1	1	1	1	1	1	1	1	1	1	1	1
13	1	1	9	6	4	1	6	4	4	1	1	1	1	1	1	1	1	1	1	4	6	8	8	7	1	6	8	10	10
54	59	57	59	60	55	64	63	58	56	53	52	59	55	49	50	49	62	58	58	65	54	65	62	64	64	65	60	56	61
25	21	15	19	20	22	23	21	21	21	20	19	16	14	13	12	11	12	14	13	16	16	14	15	14	13	13	17	15	15
16	13	9	14	15	15	18	17	17	16	15	13	11	9	8	7	7	9	10	11	13	14	13	15	13	12	12	15	15	17
11	1	1	1	2	1	1	1	1	3	1	1	1	1	0	0	0	0	0	0	0	0	4	1	1	1	1	1	1	0
2	1	1	1	1	5	1	1	1	1	1	1	1	1	1	0	0	0	0	0	0	0	0	0	0	0	0	0	0	0
87	79	73	68	70	69	71	72	74	76	76	75	72	67	72	65	67	71	71	72	72	72	72	73	74	69	61	58	60	65
201	199	199	195	194	197	199	199	204	201	201	201	194	194	197	197	194	192	194	194	192	192	192	193	192	184	185	180	180	180
283	283	286	285	282	274	274	273	272	272	272	273	275	275	279	280	281	286	283	284	285	285	285	287	285	283	283	283	283	283
346	347	344	344	341	341	343	346	348	348	347	348	350	350	351	353	353	353	353	353	351	350	352	350	349	352	349	348	348	350
367	368	362	362	362	362	361	366	368	368	369	372	373	374	374	374	374	374	376	376	376	376	373	373	374	374	374	371	371	371
324	324	322	320	318	320	324	323	323	323	323	323	324	326	326	327	328	328	325	324	323	322	320	320	320	318	316	317	316	313
334	332	335	332	322	321	332	331	336	325	329	339	351	350	329	344	343	336	329	331	329	327	323	325	324	324	323	326	329	334
350	352	347	343	341	327	338	330	327	330	328	336	338	338	337	336	337	339	339	341	348	346	340	338	334	331	328	324	326	326
315	319	315	308	306	303	302	306	310	317	319	310	314	320	320	323	323	325	329	333	335	331	312	309	299	301	310	315	311	310
197	206	206	209	208	199	199	198	198	188	186	189	189	188	194	192	190	200	205	196	196	190	185	188	186	187	187	183	185	184
286	286	286	279	276	275	276	274	277	273	271	274	277	279	277	279	278	280	281	280	278	275	273	269	262	263	265	265	270	257
363	374	362	350	351	346	346	343	345	349	346	352	354	357	356	351	357	363	363	365	359	357	355	355	348	340	334	334	335	331
291	286	289	290	290	296	293	294	294	295	294	294	295	296	296	296	295	299	300	298	298	297	295	292	288	283	283	284	278	281
403	402	390	387	394	389	389	384	383	381	382	386	381	383	379	380	384	382	382	386	390	383	395	386	386	389	380	384	374	368
401	403	405	404	404	400	391	382	382	378	379	379	386	386	384	386	391	395	398	400	401	401	399	398	398	393	384	384	376	386
409	415	409	408	407	399	398	395	395	404	402	407	409	414	411	413	404	409	415	410	409	405	405	398	398	393	394	394	396	394
420	420	418	418	416	415	414	415	415	415	415	415	418	418	421	421	421	421	421	422	422	422	423	423	423	423	423	423	427	427
366	366	363	364	364	364	370	370	370	374	374	374	377	377	379	380	380	381	381	379	386	386	386	386	383	382	382	382	382	382
388	390	389	392	394	392	394	393	390	394	395	392	394	399	403	400	404	405	407	410	408	414	414	413	413	416	415	414	413	413
400	400	403	403	403	401	400	402	406	407	407	407	412	413	413	415	418	420	420	416	418	422	422	420	420	420	421	418	420	420
423	427	427	429	430	425	422	422	424	424	425	426	427	429	429	432	432	432	433	433	433	436	433	433	431	439	437	437	440	444
446	448	451	449	449	446	439	441	441	441	439	443	449	446	451	453	453	451	454	451	456	454	458	459	462	466	464	468	464	468
456	450	446	444	444	445	445	442	442	441	443	432	433	426	421	421	423	421	420	423	421	421	419	420	421	418	415	413	419	409
454	448	446	443	442	439	438	437	435	432	430	430	431	431	431	429	428	428	429	428	428	431	432	436	437	438	439	438	436	435
464	474	464	469	468	458	456	464	463	464	463	467	469	470	472	474	475	478	480	478	478	473	471	480	479	481	478	482	483	484
487	482	480	482	478	479	467	470	466	464	463	464	467	468	473	469	472	475	476	479	480	478	482	477	477	480	479	480	483	485
511	506	507	506	502	499	492	493	493	493	490	490	492	492	495	496	495	496	497	500	503	502	502	504	504	507	509	510	514	514
485	478	477	477	474	476	474	476	466	464	467	470	478	473	475	476	472	474	474	482	475	474	475	480	482	483	497	486	478	473
547	542	542	540	539	536	535	525	532	530	530	531	529	534	536	535	538	538	540	542	544	542	542	543	544	548	546	546	546	551
567	569	570	570	569	567	567	566	566	564	567	567	566	567	568	568	568	568	567	568	569	571	570	574	575	571	574	576	580	576
562	562	562	560	557	554	555	558	557	553	553	555	558	558	558	560	561	565	566	568	568	570	568	571	570	568	572	577	578	577
165	151	144	142	142	149	152	153	151	147	144	146	146	146	140	141	141	144	135	137	140	138	142	140	140	138	138	139	139	141
209	203	198	189	193	195	196	186	191	192	197	204	207	207	205	192	186	190	192	191	194	188	188	188	182	181	182	183	179	184
211	210	194	209	203	194	181	180	186	190	190	190	194	197	200	201	193	174	169	196	201	184	199	197	195	197	198	199	204	203
129	127	125	118	110	113	115	112	108	106	105	98	104	104	102	103	101	102	101	101	109	103	106	95	101	98	96	101	101	95
140	144	147	135	139	144	146	136	132	123	123	126	129	126	125	123	125	120	117	116	124	140	125	125	124	122	121	121	124	117
0	0	0	0	0	0	0	0	0	177	177	170	171	171	169	167	173	171	157	169	165	157	153	152	147	146	147	149	151	154
272	272	258	261	261	259	263	260	263	264	266	267	268	272	270	268	270	269	267	267	270	267	264	262	259	254	262	255	257	260
307	305	304	296	298	298	299	293	296	296	299	300	307	304	297	288	286	276	268	265	259	252	247	245	239	234	235	232	236	255
490	480	479	481	478	478	472	477	478	479	481	476	482	484	483	482	480	480	480	479	479	479	475	474	471	471	472	470	475	476
634	645	628	630	626	631	628	626	608	613	614	618	620	626	624	628	632	633	627	623	625	623	619	621	624	628	640	642	644	640
620	623	624	623	624	626	623	623	624	625	625	626	626	627	627	629	630	630	630	630	630	630	631	631	630	631	633	633	634	634
580	580	578	577	576	576	576	578	578	578	577	577	577	578	578	578	582	588	588	585	585	585	584	584	584	600	586	586	583	590
711	719	717	721	713	709	704	708	697	691	693	698	699	700	704	710	712	715	713	707	700	700	700	707	709	713	720	729	729	726
685	685	683	683	676	674	672	678	677	684	679	677	679	677	676	683	684	682	681	682	681	680	684	686	687	687	693	693	698	694
658	660	659	658	656	654	655	657	656	656	657	657	658	657	657	659	661	662	662	660	660	661	660	662	663	664	668	668	668	669
649	651	651	653	655	657	656	657	657	658	658	662	664	663	662	660	657	657	657	653	652	649	648	647	647	648	650	652	654	655
635	635	632	630	631	630	630	632	634	635	634	633	630	629	630	629	628	630	630	630	632	633	635	636	633	631	630	632	632	633
758	766	765	763	759	753	751	756	757	756	756	753	754	751	745	748	753	760	761	759	760	760	759	762	759	761	765	768	769	766
738	740	740	744	745	748	748	748	750	748	750	750	749	754	743	745	743	744	743	741	741	746	748	749	750	750	750	751	754	754
714	699	703	704	705	704	706	705	702	707	707	708	712	710	706	709	709	712	713	712	715	716	718	716	717	716	718	721	722	722
684	685	685	686	685	689	692	692	694	699	698	697	697	696	697	698	698	697	694	691	693	693	692	691	691	691	695	696	696	696
600	596	594	592	593	593	595	595	597	597	599	598	596	595	593	597	598	598	600	599	601	602	600	598	596	593	591	588	590	589
648	649	649	650	650	650	650	651	650	651	647	653	653	653	653	654	658	663	662	662	662	662	668	661	661	662	663	666	665	661
703	694	694	696	689	694	686	686	684	678	677	679	687	686	685	694	703	704	699	696	693	696	694	697	707	704	707	715	713	709
705	704	697	704	703	699	695	695	678	700	695	695	696	687	704	701	697	697	697	698	698	698	697	697	699	698	706	705	705	704
572	577	577	577	576	575	580	576	576	578	577	577	577	574	574	574	574	576	576	576	576	576	576	576	571	571	571	571	576	576
600	600	600	595	595	596	596	600	600	598	595	590	590	590	590	593	596	596	596	595	591	591	590	590	588	588	588	588	588	588
634	634	631	631	630	630	630	631	631	633	634	634	634	634	634	634	640	640	640	634	630	630	631	632	632	632	632	632	634	635
689	688	686	686	680	683	686	686	686	687	686	686	686	686	690	686	688	688	687	687	686	688	688	690	686	686	689	690	690	689
810	815	818	814	810	817	810	810	814	819	828	826	825	835	823	822	834	832	831	817	821	820	817	830	823	820	817	816	822	831
775	789	787	791	795	796	792	791	792	798	803	808	803	798	800	796	795	796	797	799	796	799	802	802	810	797	792	801	795	807
764	773	772	768	771	768	770	763	766	765	768	774	768	764	763	765	768	768	771	771	767	766	764	767	771	776	779	781	782	781
648	641	643	642	643	643	646	649	646	643	644	645	643	646	648	650	648	648	645	646	646	648	647	644	644	644	643	644	647	648
607	608	610	608	608	608	608	613	612	613	610	610	611	615	612	615	616	615	605	605	605	611	609	610	607	607	609	614	615	615
746	749	745	749	747	744	744	744	745	744	746	748	749	749	749	749	751	751	751	749	749	749	749	749	749	749	749	749	749	750
816	813	813	812	809	805	808	808	810	810	814	819	814	815	811	809	813	813	816	820	819	827	826	818	823	827	824	826	827	825
774	775	774	776	773	774	774	776	782	786	788	788	787	787	787	787	787	787	787	780	788	788	788	788	788	788	794	794	795	795
775	775	774	776	775	772	773	772	772	774	771	777	778	777	780	779	777	777	773	773	774	775	775	775	772	774	778	782	782	783
800	795	797	796	794	797	800	800	799	801	797	799	801	804	804	805	805	804	804	803	801	807	809	807	807	805	812	809	813	809
786	793	791	791	787	791	787	793	785	796	796	785	785	799	787	788	793	794	797	793	796	791	797	799	796	796	803	802	799	800
814	809	809	810	810	813	819	819	823	828	828	836	825	828	830	833	833	833	832	831	831	826	831	830	830	831	831	834	838	838
704	704	704	704	704	706	702	701	702	703	705	706	706	706	711	711	711	713	710	707	708	708	708	708	708	708	708	713	713	717
768	768	768	768	757	753	740	745	742	744	744	744	751	755	762	765	772	773	773	763	761	754	756	757	759	764	766	774	780	778
827	827	819	821	819	816	816	809	809	815	811	814	821	821	823	827	827	827	826	826	826	826	828	829	829	832	833	838	843	843
862	862	862	861	864	866	866	870	874	877	881	876	877	884	884	884	884	881	881	879	885	881	879	877	888	886	890	892	889	890
881	883	888	879	881	881	880	879	878	874	879	879	883	883	887	884	888	888	888	879	882	882	883	888	888	900	910	912	912	912
825	825	822	821	814	817	807	808	805	805	805	807	811	811	816	816	821	822	822	817	813	813	813	814	814	824	831	836	839	839
801	802	800	800	797	798	795	783	783	783	783	784	787	788	789	790	798	798	797	796	790	788	788	791	793	806	807	812	817	817
855	853	846	846	846	845	841	839	839	840	839	842	842	845	847	846	846	846	842	841	841	842	844	845	845	851	860	867	872	874
829	826	823	823	823	820	815	811	810	812	809	809	814	817	817	817	818	819	819	819	819	822	822	822	826	831	838	843	850	854
884	903	890	889	882	888	890	886	884	887	888	889	890	893	893	892	891	888	887	888	888	889	889	893	895	897	896	897	897	899
915	0	0	0	0	0	0	0	0	0	0	0	0	0	0	0	0	0	0	0	0	0	0	0	0	0	0	0	0	0
912	912	909	905	906	908	912	916	918	920	921	921	923	925	923	920	918	922	924	925	928	928	927	930	933	942	950	952	952	949
955	950	949	952	954	955	958	959	958	958	958	960	962	963	964	965	966	968	970	970	972	970	972	975	981	992	998	1003	1004	1003
836	836	844	834	834	839	833	843	844	846	849	839	834	848	842	849	851	852	841	841	835	842	844	841	831	837	843	845	848	858
848	850	848	847	846	845	846	845	844	845	846	847	848	850	850	849	848	846	846	846	846	846	846	845	844	843	846	846	847	845
868	870	869	869	869	869	869	868	869	867	868	868	868	868	867	866	866	867	867	868	867	867	866	865	861	864	864	864	866	864
858	851	851	853	853	853	853	849	848	850	850	863	863	866	867	866	866	865	864	865	864	865	863	864	865	867	867	867	868	868
922	918	919	918	917	916	917	917	917	917	918	918	918	921	920	920	919	918	920	921	920	920	921	922	922	923	926	927	928	929
798	781	782	781	780	780	782	783	782	785	788	790	790	791	791	792	793	793	794	794	795	798	799	797	796	798	800	803	802	803
987	988	985	983	982	981	983	984	985	986	988	987	988	988	985	986	986	986	986	987	988	989	990	987	998	1000	1005	1007	1008	1006
999	1001	1002	1000	996	1000	1003	1002	998	1005	1005	1004	1009	1010	1008	1009	1007	1007	1008	1009	1009	1009	1011	1020	1022	1027	1030	1036	1035	1034
1028	1027	1027	1023	1023	1023	1023	1022	1022	1023	1025	1026	1026	1026	1025	1026	1025	1026	1027	1027	1028	1028	1033	1038	1044	1044	1047	1047	1048	1047
1015	1014	1009	1009	1007	1006	1015	1015	1013	1016	1017	1015	1017	1017	1017	1021	1023	1023	1025	1027	1028	1029	1042	1042	1050	1052	1056	1058	1057	1057
970	969	968	969	969	968	967	967	968	967	968	968	968	968	966	966	966	968	969	978	976	972	971	971	977	978	982	983	984	983
946	946	946	943	942	942	941	941	941	939	938	938	940	941	942	941	941	941	941	943	943	943	943	943	944	948	954	954	954	953
907	907	905	910	910	912	903	905	905	905	905	905	905	904	903	903	903	903	914	912	906	906	906	906	914	904	898	898	898	902
925	925	925	920	921	924	924	924	924	924	925	925	925	924	922	922	922	922	924	924	924	926	926	926	925	923	923	923	923	923
964	966	966	962	958	956	956	956	956	954	955	959	961	964	963	965	965	960	966	965	957	968	965	958	960	967	967	972	971	971
992	991	988	989	989	987	986	987	986	984	986	986	985	985	984	987	987	986	988	988	990	988	988	987	989	995	993	993	993	991
1006	1004	1001	999	1001	998	997	998	997	997	997	999	999	1000	1000	1000	1001	1002	1004	1003	1002	1005	999	998	1006	1011	1011	1013	1015	1016
1051	1053	1054	1053	1054	1053	1054	1053	1054	1054	1053	1054	1051	1051	1051	1051	1054	1056	1056	1056	1057	1056	1063	1065	1073	1075	1078	1078	1077	1074
1047	1039	1037	1038	1040	1041	1046	1045	1044	1046	1048	1048	1047	1050	1052	1053	1053	1054	1057	1058	1058	1057	1057	1074	1064	1066	1070	1072	1072	1072
1031	1031	1029	1028	1028	1024	1025	1023	1022	1034	1034	1034	1031	1031	1031	1033	1038	1038	1035	1035	1040	1038	1038	1038	1040	1044	1037	1034	1035	1035
1066	1066	1066	1061	1062	1063	1066	1065	1065	1066	1068	1068	1069	1068	1070	1072	1072	1073	1073	1074	1076	1075	1079	1085	1084	1084	1084	1084	1084	1083
1073	1069	1068	1068	1068	1064	1064	1062	1062	1061	1062	1062	1061	1063	1065	1067	1065	1067	1069	1070	1073	1073	1071	1074	1080	1084	1084	1080	1078	1076
1105	1095	1092	1094	1092	1091	1091	1091	1090	1089	1088	1087	1087	1088	1088	1090	1090	1090	1089	1090	1092	1092	1093	1107	1109	1101	1101	1102	1100	1098
1130	1136	1137	1135	1124	1123	1124	1124	1124	1125	1127	1128	1126	1124	1127	1128	1128	1127	1121	1123	1128	1128	1138	1143	1138	1139	1140	1144	1140	1141
1126	1129	1128	1127	1126	1125	1124	1122	1122	1124	1125	1129	1133	1132	1135	1130	1138	1139	1136	1138	1144	1142	1147	1152	1150	1147	1145	1144	1143	1143
1095	1090	1091	1090	1091	1090	1089	1090	1087	1086	1088	1087	1088	1085	1086	1095	1086	1089	1094	1096	1095	1102	1106	1114	1114	1119	1120	1118	1119	1116
1086	1081	1088	1082	1081	1088	1080	1078	1077	1083	1085	1085	1079	1080	1079	1083	1081	1081	1082	1085	1086	1086	1087	1093	1093	1098	1095	1096	1095	1091
1057	1056	1055	1054	1053	1053	1054	1054	1054	1054	1053	1052	1051	1053	1054	1057	1057	1059	1062	1065	1073	1063	1077	1080	1085	1089	1089	1090	1098	1097
1182	1163	1161	1161	1161	1167	1170	1165	1163	1158	1162	1158	1153	1151	1145	1147	1150	1151	1152	1149	1153	1155	1157	1170	1171	1170	1163	1168	1171	1163
1243	1231	1228	1228	1223	1224	1222	1217	1218	1221	1224	1227	1220	1215	1212	1207	1204	1207	1215	1218	1216	1220	1224	1236	1234	1236	1238	1235	1234	1230
1127	1129	1129	1129	1129	1127	1129	1129	1129	1129	1128	1129	1131	1132	1124	1128	1128	1128	1128	1129	1129	1129	1112	1130	1130	1135	1130	1130	1134	1132
1139	1139	1137	1135	1137	1136	1136	1133	1134	1137	1138	1143	1146	1147	1146	1145	1144	1144	1141	1141	1142	1141	1141	1146	1153	1151	1151	1153	1148	1147
1072	1076	1073	1074	1072	1073	1075	1075	1075	1076	1076	1077	1076	1077	1078	1078	1079	1081	1082	1083	1086	1088	1092	1096	1098	1098	1099	1100	1101	1100
1108	1104	1102	1102	1103	1103	1105	1104	1104	1105	1105	1105	1104	1106	1105	1105	1107	1107	1110	1110	1118	1119	1122	1122	1123	1123	1123	1123	1125	1123
1100	1101	1103	1101	1100	1100	1100	1100	1100	1100	1100	1100	1102	1103	1103	1103	1103	1103	1103	1103	1103	1103	1108	1111	1112	1117	1120	1125	1129	1129
1138	1139	1136	1136	1135	1132	1134	1131	1131	1132	1135	1131	1139	1139	1137	1138	1140	1144	1144	1144	1146	1146	1150	1154	1154	1156	1159	1161	1160	1159
1115	1118	1120	1120	1120	1120	1120	1120	1120	1121	1122	1122	1122	1122	1119	1120	1115	1121	1123	1121	1127	1130	1134	1140	1140	1140	1145	1146	1146	1146
1149	1157	1158	1159	1150	1151	1154	1155	1155	1153	1149	1150	1145	1157	1153	1152	1150	1151	1153	1154	1156	1159	1162	1156	1156	1155	1155	1151	1156	1156
1189	1190	1189	1190	1189	1194	1191	1190	1190	1189	1190	1191	1194	1193	1192	1191	1188	1188	1188	1188	1193	1197	1199	1206	1202	1201	1196	1195	1196	1195
1216	1218	1219	1222	1223	1222	1221	1218	1214	1210	1209	1209	1209	1214	1212	1205	1208	1210	1209	1211	1216	1222	1222	1221	1221	1221	1216	1216	1216	1212
1197	1197	1199	1203	1205	1206	1209	1209	1205	1201	1201	1197	1195	1198	1198	1199	1195	1195	1197	1197	1200	1199	1205	1206	1206	1206	1209	1210	1210	1209
1240	1240	1231	1240	1237	1240	1242	1240	1230	1230	1236	1237	1241	1238	1239	1239	1236	1242	1243	1243	1234	1240	1240	1234	1236	1236	1233	1232	1232	1231
1236	1231	1230	1237	1232	1232	1232	1233	1237	1241	1248	1245	1249	1248	1241	1247	1245	1247	1247	1246	1248	1250	1246	1245	1245	1229	1232	1231	1231	1233
1160	1160	1158	1159	1157	1158	1159	1159	1159	1159	1161	1161	1163	1164	1166	1167	1170	1171	1172	1172	1174	1180	1180	1180	1176	1175	1180	1180	1180	1179
1209	1207	1211	1210	1210	1209	1210	1212	1214	1215	1215	1217	1221	1223	1228	1235	1239	1245	1249	1248	1248	1255	1248	1245	1239	1236	1233	1230	1228	1225
1243	1244	1248	1252	1254	1257	1258	1263	1257	1259	1263	1269	1270	1273	1274	1274	1277	1282	1283	1285	1284	1285	1283	1283	1283	1276	1273	1270	1267	1265
1240	1232	1234	1241	1245	1246	1245	1243	1243	1240	1239	1241	1233	1230	1227	1226	1226	1225	1226	1232	1237	1241	1246	1252	1252	1251	1248	1248	1251	1250
1233	1230	1229	1230	1231	1229	1231	1231	1232	1231	1232	1231	1233	1232	1232	1232	1232	1234	1234	1236	1238	1240	1238	1240	1245	1247	1248	1247	1248	1249
1293	1296	1288	1294	1294	1293	1295	1295	1298	1303	1304	1309	1310	1312	1308	1310	1311	1314	1317	1318	1319	1322	1322	1324	1321	1320	1318	1317	1313	1312
1273	1275	1276	1276	1277	1276	1276	1272	1272	1270	1266	1263	1265	1263	1262	1264	1266	1263	1263	1268	1271	1274	1277	1283	1288	1287	1286	1286	1286	1284
1267	1271	1271	1271	1271	1273	1271	1272	1268	1278	1278	1277	1277	1280	1281	1281	1281	1281	1285	1285	1285	1288	1289	1289	1293	1293	1293	1293	1294	1293
1275	1274	1279	1276	1276	1276	1280	1284	1285	1288	1288	1293	1294	1294	1294	1294	1297	1297	1298	1299	1300	1300	1317	1314	1299	1292	1291	1290	1290	1289
1302	1303	1302	1302	1303	1305	1308	1309	1309	1310	1312	1314	1315	1321	1314	1314	1312	1314	1312	1313	1316	1317	1317	1319	1321	1319	1318	1314	1314	1316
1338	1333	1331	1336	1338	1341	1341	1339	1339	1337	1336	1339	1348	1346	1339	1339	1341	1341	1342	1338	1345	1341	1345	1344	1337	1334	1333	1334	1334	1335
1334	1333	1329	1328	1327	1330	1334	1337	1338	1340	1343	1345	1345	1347	1351	1354	1354	1354	1354	1353	1355	1360	1362	1359	1353	1347	1344	1343	1341	1341
1364	1361	1362	1361	1364	1367	1369	1368	1369	1372	1376	1380	1387	1392	1396	1393	1382	1381	1379	1379	1378	1384	1385	1390	1388	1378	1374	1372	1371	1371
1439	1437	1442	1446	1452	1464	1461	1461	1460	1462	1464	1464	1463	1463	1460	1457	1455	1455	1451	1454	1456	1457	1459	1459	1456	1453	1451	1449	1447	1446
1477	1480	0	0	0	0	0	0	0	0	0	0	0	0	0	0	0	0	1477	1477	1477	1478	1472	1480	1480	1480	1480	1480	1476	1478
1468	1473	1476	1480	1480	1480	1480	1480	1478	0	0	0	0	0	0	1479	1480	1480	1480	1480	0	0	0	0	1477	1480	1480	1480	1477	1478
1420	1412	1413	1416	1417	1418	1422	1425	1428	1429	1426	1428	1432	1435	1438	1437	1437	1435	1434	1439	1442	1454	1444	1442	1439	1435	1434	1430	1428	1428
1316	1307	1303	1304	1300	1300	1303	1305	1303	1303	1302	1305	1300	1300	1304	1300	1302	1303	1303	1306	1317	1317	1320	1318	1325	1326	1324	1321	1315	1312
1322	1317	1317	1317	1316	1319	1320	1320	1321	1322	1324	1325	1324	1326	1327	1327	1328	1330	1330	1332	1334	1334	1336	1342	1343	1343	1345	1345	1343	1341
1350	1353	1351	1350	1351	1350	1352	1353	1356	1357	1361	1362	1364	1368	1369	1371	1366	1366	1365	1370	1372	1379	1381	1382	1380	1376	1372	1369	1367	1366
1368	1372	1377	1371	1365	1367	1370	1371	1373	1374	1378	1379	1382	1385	1394	1400	1395	1395	1394	1393	1396	1399	1399	1400	1402	1396	1391	1390	1388	1387
1424	1425	1427	1427	1427	1429	1431	1430	1431	1430	1428	1428	1428	1430	1428	1430	1430	1431	1430	1432	1434	1435	1437	1434	1429	1427	1426	1425	1425	1424
1363	1370	1369	1371	1368	1369	1375	1374	1374	1366	1370	1363	1363	1367	1368	1363	1363	1370	1370	1371	1371	1371	1371	1371	1376	1376	1370	1373	1368	1370
1436	1436	1442	1446	1443	1443	1439	1436	1436	1436	1437	1433	1437	1439	1440	1442	1443	1443	1444	1440	1436	1435	1434	1436	1433	1430	1430	1436	1438	1437
1410	1414	1403	1404	1406	1404	1408	1409	1409	1409	1407	1405	1404	1406	1410	1411	1408	1411	1413	1412	1415	1414	1412	1412	1412	1410	1416	1415	1418	1417
1389	1397	1401	1387	1390	1397	1395	1413	1404	1408	1412	1411	1410	1404	1398	1401	1400	1398	1404	1404	1404	1388	1408	1408	1405	1398	1400	1400	1399	1403
1280	1280	1280	1280	1284	1287	1290	1290	1290	1290	1290	1290	1290	1291	1289	1289	1284	1281	1279	1279	1284	1287	1289	1290	1285	1288	1281	1277	1278	1275
1326	1327	1329	1331	1333	1333	1333	1338	1338	1336	1336	1336	1336	1338	1340	1336	1336	1336	1338	1337	1337	1338	1344	1344	1344	1339	1333	1332	1332	1332
1307	1312	1312	1312	1314	1314	1315	1314	1313	1310	1307	1307	1305	1305	1307	1307	1309	1309	1312	1312	1312	1313	1314	1318	1321	1323	1323	1324	1324	1324
1300	1307	1307	1309	1312	1312	1317	1317	1317	1317	1317	1317	1314	1313	1313	1313	1317	1317	1321	1322	1327	1331	1332	1332	1333	1335	1336	1336	1336	1336
1348	1348	1344	1344	1344	1346	1353	1355	1355	1356	1356	1356	1358	1368	1373	1370	1358	1358	1355	1355	1355	1357	1357	1356	1357	1358	1353	1353	1355	1355
1348	1348	1344	1344	1344	1346	1353	1355	1355	1356	1356	1356	1358	1368	1373	1370	1358	1358	1355	1355	1355	1357	1357	1356	1357	1358	1362	1363	1365	1364
1410	1406	1416	1420	1429	1438	1441	1440	1440	1436	1434	1430	1425	1428	1431	1423	1422	1429	1421	1420	1422	1422	1426	1421	1415	1411	1414	1419	1420	1418
1297	1290	1283	1286	1286	1293	1297	1301	1304	1307	1304	1305	1304	1307	1303	1296	1295	1296	1294	1305	1307	1304	1313	1322	1319	1312	1312	1305	1313	1296
1276	1279	1269	1266	1270	1277	1274	1277	1286	1288	1289	1288	1278	1288	1285	1270	1280	1281	1282	1283	1292	1288	1285	1290	1287	1285	1292	1287	1279	1282
1459	1461	1464	1480	1477	1480	1480	1480	1480	1480	1480	1480	1480	1480	0	0	0	1480	1480	1480	1480	1480	1480	0	0	1479	1479	0	0	0
0	886	886	886	886	887	887	887	890	890	890	896	896	896	896	896	896	896	896	896	896	896	896	900	899	901	902	905	905	907
855	855	855	855	855	855	855	855	855	855	860	860	860	860	861	861	861	861	866	866	866	866	866	864	864	864	864	864	868	870
355	356	356	360	360	360	360	361	362	365	368	374	384	386	387	390	389	389	385	385	386	386	386	385	390	391	391	391	392	392
341	341	353	352	353	353	358	363	363	370	370	373	379	384	388	391	394	393	394	391	389	389	389	387	389	389	391	391	391	392
850	850	851	850	848	844	843	843	845	849	850	853	857	857	859	859	859	856	856	856	856	860	863	863	863	863	857	857	857	862
0	0	0	0	0	0	0	0	0	1023	1024	1022	1021	1021	1021	1023	1027	1033	1033	1033	1040	1040	1040	1040	1045	1041	1038	1040	1038	1039
1478	1478	1478	1478	1478	1478	1478	1478	1477	1476	1470	1480	1468	1478	1468	1468	1468	1472	1480	1473	1472	1480	1470	1473	1473	1473	1473	1479	1479	1480
1479	1479	1479	1479	1479	0	0	1479	1479	1479	1476	1475	1475	1475	1478	1478	1480	1480	1480	1480	1480	1480	1478	1479	1479	1480	1480	0	0	0
0	0	0	0	0	0	0	1476	1476	1472	1472	1474	1475	1476	1477	1479	1479	0	0	0	0	1477	0	0	0	0	0	0	0	0
0	0	0	0	0	0	0	0	0	0	0	0	0	0	0	1476	1478	1478	1473	1469	1462	1463	1460	1463	1463	1449	1451	1451	1456	1457
1475	1473	1469	1465	1465	1466	1467	1468	1468	1468	1468	1468	1468	1468	1468	1469	1469	1469	1471	1474	1479	1479	1480	1480	1480	1480	1479	1478	1478	1478
1464	1466	1464	1461	1460	1460	1458	1459	1460	1462	1459	1454	1451	1451	1453	1453	1454	1455	1453	1452	1452	1454	1450	1451	1454	1447	1447	1448	1452	1453
1477	1480	1479	1477	1480	1480	1480	1480	1480	1480	1480	1480	1480	1480	1480	1480	1480	1480	1480	1480	1479	1480	1479	1480	1473	1480	1477	1471	1471	1470
1473	1473	1472	1471	1471	1471	1471	1471	1468	1468	1468	1470	1468	1468	1468	1470	1470	1470	1470	1475	1475	0	0	0	0	0	0	0	0	0
1202	1203	1198	1198	1197	1197	1196	1197	1199	1199	1198	1198	1199	1199	1199	1199	1199	1197	1199	1200	1201	1199	1199	1195	1194	1193	1194	1194	1195	1194
1165	1168	1167	1167	1166	1163	1163	1163	1163	1163	1163	1164	1165	1166	1170	1168	1167	1167	1168	1170	1172	1174	1175	1172	0	0	0	0	0	0
519	519	525	520	519	518	519	521	519	517	519	521	519	518	518	518	520	519	521	522	522	526	520	521	519	518	522	523	523	524
538	536	535	535	534	534	534	533	535	534	536	536	536	536	536	535	535	535	535	535	535	534	534	534	533	534	534	535	535	535
568	568	567	566	564	567	566	566	571	568	568	568	567	568	566	567	563	564	563	563	564	564	562	563	564	565	565	569	570	569
563	563	562	562	562	563	563	564	563	564	564	561	560	561	561	561	560	559	559	559	561	562	562	562	560	561	561	561	561	561
605	605	604	604	604	605	605	605	605	605	606	606	605	605	605	605	604	604	605	606	606	606	607	608	609	609	608	608	610	610
433	430	429	427	427	423	422	423	423	425	426	429	427	428	425	419	416	415	413	411	411	410	411	411	409	412	412	414	415	415
957	954	951	958	954	952	953	956	957	955	953	951	947	948	947	949	949	947	948	947	947	947	948	948	952	951	953	954	954	953
966	965	959	958	956	953	954	957	957	956	956	957	957	951	947	947	946	951	949	949	950	954	956	959	962	970	965	966	963	960
897	894	901	906	904	905	905	910	916	916	924	920	912	916	913	914	912	912	903	906	909	911	913	910	907	915	913	913	907	904
1020	1008	1003	1004	1005	1011	1009	1015	1008	1007	1012	1009	997	1012	1013	1009	1009	1009	1011	1004	1006	1008	1012	1011	1021	1025	1016	1017	1009	1010
1040	1035	1038	1031	1035	1038	1037	1044	1040	1034	1047	1045	1043	1043	1047	1047	1041	1040	1041	1038	1033	1037	1039	1044	1049	1052	1053	1053	1053	1051

## Sheet: Centroid_Y
202	209	202	204	210	203	208	218	218	220	221	209	220	216	205	204	204	201	204	198	201	199	201	197	196	194	195	194	195	195
272	268	264	271	265	271	282	284	283	283	271	268	267	266	266	267	267	264	262	261	0	0	0	0	0	0	0	0	0	0
255	267	270	262	257	253	267	0	0	0	0	0	0	0	0	0	0	0	0	0	0	0	0	0	0	0	0	0	0	0
0	0	0	0	0	0	0	0	0	252	240	229	216	216	215	217	218	220	0	0	0	0	0	0	0	0	0	0	0	0
0	0	0	0	0	0	0	0	0	252	240	229	228	229	229	228	229	231	235	235	237	238	239	239	240	241	241	242	243	244
162	162	160	160	159	162	164	171	153	178	176	179	180	177	176	175	176	175	176	177	173	176	179	174	172	171	171	170	169	170
121	111	123	117	117	117	122	129	137	140	139	128	126	128	127	125	124	125	127	127	127	124	119	120	119	119	119	114	113	114
94	93	95	95	95	94	96	99	100	103	105	107	107	105	103	102	100	102	97	96	97	98	96	94	92	87	87	84	85	84
148	147	147	146	146	146	146	158	165	171	173	176	176	175	172	170	169	169	163	165	166	162	158	175	154	155	153	152	151	150
0	0	0	0	0	0	0	0	0	0	0	0	0	0	0	0	0	0	0	0	0	0	0	0	0	0	0	0	0	0
216	216	216	212	206	206	208	210	213	215	215	211	207	206	205	205	207	206	206	206	206	206	206	206	206	201	201	198	196	0
251	249	247	246	245	246	250	251	249	252	250	241	240	237	236	236	241	243	240	243	246	243	243	238	236	236	236	233	233	0
352	348	355	358	351	348	344	339	333	343	346	341	342	340	340	340	346	346	345	341	338	331	333	338	337	337	332	332	329	328
249	251	253	254	252	256	251	258	257	257	258	247	253	255	252	248	258	255	259	252	252	253	243	246	248	247	246	248	252	254
190	187	200	201	191	185	191	194	205	191	195	201	191	189	185	185	171	173	174	176	170	174	176	177	177	180	175	175	174	173
269	268	271	265	268	247	251	270	260	258	253	262	265	268	262	251	262	241	239	246	236	228	227	224	230	214	221	231	233	236
109	110	112	111	108	109	110	116	122	130	131	133	135	133	134	132	131	128	126	124	125	125	120	120	116	114	113	113	113	112
115	111	115	117	116	113	114	119	118	124	126	128	129	131	131	131	129	126	124	124	124	120	125	122	117	117	115	115	115	113
327	325	314	323	328	324	326	333	325	327	332	326	326	330	327	328	330	331	331	329	336	340	341	339	340	339	342	340	340	339
29	25	25	25	28	28	24	26	31	36	36	41	41	35	29	23	27	21	18	14	14	15	12	12	12	8	8	11	11	11
7	5	5	7	6	6	6	14	20	19	25	28	22	21	18	13	12	9	7	1	7	6	1	1	1	1	1	1	1	1
5	1	1	1	1	1	1	5	5	1	10	5	3	1	1	1	1	1	1	6	1	1	1	1	1	1	1	1	1	1
100	96	97	100	96	93	91	95	100	94	91	89	89	88	86	83	81	76	77	85	91	87	80	83	85	82	80	77	77	75
119	123	124	125	128	124	124	130	139	139	139	140	142	139	138	133	128	125	125	124	124	115	114	123	120	133	108	118	108	108
43	43	46	45	44	41	36	41	42	52	55	56	55	55	53	52	50	50	47	52	49	49	49	48	46	44	42	42	41	41
75	78	83	83	80	79	77	76	79	89	91	90	92	91	87	84	81	83	83	80	83	75	74	74	75	76	75	74	75	76
172	168	169	166	167	168	168	173	174	173	171	170	164	163	155	149	154	150	171	148	136	135	136	136	136	137	136	143	146	145
140	134	132	130	128	133	131	123	135	124	124	126	129	127	122	119	118	122	125	122	118	117	115	113	112	112	112	111	108	109
64	65	63	57	56	55	53	53	62	52	52	50	48	45	44	45	37	31	34	38	51	51	48	46	48	46	44	44	43	41
154	154	154	156	156	154	157	170	178	183	177	176	175	170	166	164	164	161	164	156	155	152	154	154	150	153	151	152	152	0
60	58	56	55	59	56	53	56	61	68	76	70	66	66	64	62	57	61	56	57	57	58	57	59	51	51	53	49	48	51
5	1	1	1	1	1	1	2	5	6	13	12	13	17	17	16	15	13	12	14	21	16	16	13	11	7	4	2	2	3
7	1	5	2	1	1	5	5	11	19	23	22	20	18	15	11	9	8	12	12	9	9	8	6	1	1	1	1	1	4
30	27	27	29	25	20	22	27	34	30	34	35	25	24	20	17	17	17	28	39	46	53	45	34	32	27	23	23	22	19
159	170	172	172	162	152	172	176	184	185	185	183	184	177	173	163	164	161	153	159	156	141	133	130	129	130	132	133	132	131
361	360	362	367	361	370	365	350	349	346	344	342	344	351	355	353	353	353	358	352	350	344	340	337	338	341	342	342	344	346
332	337	343	338	341	342	338	328	326	334	325	322	320	334	336	339	332	333	328	326	319	320	318	314	318	320	321	321	327	327
0	0	0	0	0	0	0	0	0	0	0	0	0	0	0	0	0	0	0	0	267	268	269	275	273	270	271	269	266	263
437	436	429	429	423	421	418	414	420	420	425	425	425	428	429	427	436	430	435	435	437	435	433	435	435	437	437	439	439	440
471	465	459	459	456	459	457	451	448	454	458	454	456	459	464	462	467	468	467	467	462	465	463	464	462	468	474	473	470	474
446	447	452	452	449	457	449	444	446	444	444	448	446	443	446	448	444	438	441	447	444	438	437	442	440	446	453	445	445	445
472	474	481	480	474	484	481	473	470	471	472	473	470	472	467	462	465	465	464	474	474	472	466	465	467	474	481	476	477	476
510	511	511	511	516	519	519	508	502	497	486	489	489	491	493	494	494	487	492	497	495	492	493	493	491	491	496	501	502	502
525	525	526	527	522	528	527	533	509	506	521	521	517	525	524	526	524	524	523	530	535	528	526	523	530	530	529	529	526	527
562	559	562	554	555	560	552	561	559	552	543	548	551	558	553	551	554	550	552	555	557	553	553	552	555	557	556	554	554	555
536	534	530	530	531	521	521	519	514	504	515	518	518	521	525	525	528	533	529	527	538	538	527	526	529	526	534	533	535	535
459	466	468	471	472	478	449	443	437	435	433	431	431	437	437	440	439	440	439	441	441	441	439	439	439	439	441	440	438	436
544	544	534	534	531	532	531	526	517	514	513	511	512	518	518	517	520	521	522	528	532	531	547	546	545	546	544	544	0	0
486	489	496	497	497	497	498	489	474	467	461	459	460	470	471	472	470	467	470	473	474	470	468	469	464	465	464	464	464	465
411	406	410	410	403	402	396	388	377	379	378	370	369	368	372	373	374	374	377	380	374	373	375	376	371	374	372	372	373	372
454	453	458	452	453	455	453	441	431	422	412	407	407	410	415	415	416	417	417	419	417	415	414	413	417	417	419	416	416	415
422	421	422	422	420	423	415	407	392	383	372	366	367	372	376	378	379	380	381	379	376	371	368	367	368	369	370	371	371	371
391	393	396	391	392	399	385	374	363	355	347	342	343	349	353	355	354	355	357	355	351	346	343	341	343	346	345	348	349	349
505	507	510	510	509	509	505	493	487	481	474	467	472	478	484	483	482	481	481	484	483	485	481	477	478	479	481	480	482	484
547	544	544	541	539	539	537	530	514	505	499	498	499	502	503	503	505	506	508	509	509	505	506	506	507	505	505	507	507	507
592	592	600	601	603	604	604	600	594	585	593	578	575	580	581	599	602	581	601	594	601	607	609	588	604	597	588	591	604	604
591	588	593	590	594	598	595	591	585	574	571	567	556	571	572	575	574	575	576	580	581	581	582	582	579	580	581	579	581	580
637	641	648	653	655	654	648	647	648	626	622	617	615	620	622	624	627	623	625	635	636	639	644	634	636	622	624	624	635	635
635	633	636	641	643	646	646	643	636	606	605	608	610	612	612	612	611	612	615	619	622	613	620	619	618	616	612	612	614	616
657	659	663	666	668	670	670	668	662	654	647	643	641	644	644	647	646	638	646	646	648	640	641	642	639	641	638	639	640	642
694	695	694	699	705	708	704	714	713	695	680	678	676	678	678	685	687	686	677	676	687	692	693	688	686	684	684	684	685	685
718	711	710	715	716	720	725	717	726	704	706	699	699	700	681	701	711	694	699	702	714	712	711	704	717	709	714	711	718	718
684	685	690	695	696	698	698	699	682	678	671	669	668	669	671	676	677	673	664	671	672	671	670	670	669	667	666	666	667	670
706	715	711	719	718	719	709	707	716	710	693	695	699	699	694	683	696	698	697	706	707	708	704	703	706	703	702	701	701	697
720	718	707	723	730	729	725	718	717	717	712	710	711	713	701	703	709	715	716	712	715	709	708	709	707	708	708	711	710	713
835	848	853	847	846	847	847	845	842	838	834	826	825	831	831	834	835	850	841	850	854	852	845	844	851	854	850	854	849	850
777	778	780	771	785	781	777	763	759	775	763	760	762	765	760	758	759	765	772	769	776	771	771	773	772	772	766	769	772	769
803	815	815	813	812	813	814	812	802	806	800	801	803	802	797	794	795	802	796	791	806	808	805	805	809	811	812	813	816	815
744	742	750	747	751	755	751	760	742	728	725	722	721	727	730	739	734	725	722	730	726	736	736	734	735	734	731	741	744	745
812	827	826	816	829	816	813	812	812	806	805	804	814	801	802	807	805	802	800	802	803	803	801	806	807	813	816	806	814	810
601	598	598	597	595	593	587	583	582	586	562	560	557	557	559	562	562	564	565	565	567	572	570	567	567	569	564	563	563	563
560	556	554	553	550	545	536	518	508	490	494	492	492	493	493	494	500	499	500	503	512	510	508	505	504	487	487	493	493	495
505	505	513	506	506	508	501	478	472	459	456	457	468	468	468	468	463	473	473	463	463	469	454	453	453	456	453	458	458	463
470	469	468	473	469	469	469	449	444	436	434	422	424	428	432	436	436	439	441	440	435	429	425	422	423	423	423	423	423	427
456	455	456	456	453	454	449	435	416	415	397	397	401	405	408	416	411	411	419	415	408	404	398	398	396	396	400	398	398	399
526	537	538	538	540	539	532	510	498	492	488	488	495	497	499	498	502	503	505	504	501	489	489	491	493	496	499	503	505	505
713	718	726	725	725	727	718	719	712	710	700	691	689	689	690	693	696	697	700	701	704	700	709	709	710	706	706	704	708	710
639	636	641	641	641	638	635	626	618	610	606	604	601	601	600	601	605	606	606	608	608	608	605	605	602	606	606	606	606	606
1041	1041	1044	1056	1061	1073	1076	1078	1079	1082	1083	1077	1072	1072	1067	1060	1065	1065	1066	1065	1066	1067	1067	1067	1070	1057	1057	1057	1059	1061
981	985	991	994	1000	1007	1015	1017	1007	1003	996	996	990	983	976	980	982	981	981	979	974	976	976	986	989	993	993	997	991	986
432	418	425	419	417	418	412	417	394	380	379	382	384	388	386	384	384	382	373	372	361	356	358	353	352	353	360	365	362	365
410	414	416	420	416	416	403	385	376	371	365	356	359	361	369	368	366	367	367	364	353	348	341	332	334	343	356	349	352	353
341	341	351	352	352	349	337	328	330	319	313	306	308	314	316	321	317	315	318	315	309	303	296	289	294	301	303	306	307	309
343	346	352	354	358	348	341	334	328	323	315	312	316	319	323	319	313	315	313	307	299	294	285	285	287	294	298	305	305	310
383	379	388	388	392	396	376	370	363	355	349	339	344	339	342	339	342	345	343	352	328	329	328	322	317	324	333	337	332	340
501	501	506	508	505	498	490	478	463	458	454	454	458	459	457	457	460	461	461	449	446	439	436	432	438	449	452	452	454	459
219	223	230	228	225	206	225	234	241	234	236	240	239	236	236	234	234	232	228	223	207	199	201	206	212	219	223	217	222	221
236	245	247	247	248	234	255	258	263	258	258	258	258	257	255	249	256	255	251	243	238	234	234	238	243	246	248	248	253	256
726	720	723	722	722	721	721	721	723	712	705	698	706	690	695	701	699	699	701	707	707	708	712	714	710	709	711	710	709	713
698	694	700	701	700	697	694	692	706	679	685	665	667	662	663	663	664	662	663	662	660	664	667	667	669	668	669	671	673	674
180	182	187	186	186	175	184	189	195	197	195	195	195	196	190	188	191	197	194	178	165	163	163	167	171	171	175	177	175	175
200	200	201	199	197	190	207	214	224	219	217	218	218	216	217	220	222	223	219	205	196	191	190	190	190	194	198	200	201	204
260	264	270	268	263	261	272	273	275	277	272	272	274	272	272	273	274	276	277	291	286	284	287	289	289	290	292	295	298	301
45	48	45	42	45	43	46	52	55	60	66	67	61	57	51	52	52	55	71	80	78	74	72	64	62	61	60	58	59	59
75	76	75	72	71	67	73	75	80	84	86	88	88	89	90	88	86	89	95	88	86	83	80	78	74	79	78	77	75	74
94	94	100	96	94	86	87	93	111	115	124	125	126	126	125	123	119	122	119	112	108	105	106	103	102	102	100	101	100	100
50	49	48	44	44	44	44	52	64	72	73	74	64	62	62	62	59	63	64	67	66	67	63	63	62	63	63	63	62	64
24	26	24	20	23	21	23	24	31	37	36	31	27	24	24	25	26	27	42	45	41	37	33	24	21	23	26	28	26	26
17	16	19	12	14	12	15	19	29	30	32	42	48	44	43	44	42	48	54	59	57	50	47	43	34	32	32	31	27	25
9	1	7	8	6	1	5	8	27	28	30	30	29	31	32	30	28	29	35	36	39	36	33	28	25	23	22	20	17	16
0	9	1	1	1	1	1	1	1	1	1	1	1	1	1	1	4	1	1	1	1	1	1	4	3	3	1	0	0	0
280	280	277	276	275	270	269	271	270	276	271	261	257	255	254	253	251	256	264	267	270	276	276	272	277	271	272	273	276	276
243	244	236	237	243	243	248	245	243	242	242	235	233	230	232	232	232	234	240	238	238	244	244	244	248	249	247	248	244	257
335	337	341	341	334	332	331	323	328	317	318	309	304	304	310	310	316	321	321	325	325	326	323	315	315	311	309	311	314	318
321	328	333	335	333	331	326	332	334	326	312	300	295	301	304	306	307	310	312	314	317	316	323	321	324	316	316	325	330	332
392	389	390	384	379	384	380	371	364	364	358	346	346	347	349	351	351	358	367	365	364	362	359	359	357	356	354	358	367	367
0	0	362	353	345	353	346	344	338	332	331	324	319	321	326	327	322	325	323	326	323	319	318	323	324	329	329	325	326	330
383	385	379	369	368	374	366	362	361	352	350	347	347	349	352	358	353	354	352	347	352	355	353	356	358	360	359	356	356	356
424	427	427	432	433	426	421	405	398	388	388	381	374	369	367	371	373	377	382	384	384	383	383	380	381	380	385	391	400	402
456	456	456	460	460	456	449	439	429	424	407	410	407	412	410	410	414	410	417	417	417	410	410	413	420	415	421	423	430	431
496	502	507	505	500	497	484	471	457	458	451	446	446	446	452	449	451	452	454	450	440	435	433	436	434	440	439	442	442	443
495	493	496	499	494	490	487	470	467	452	450	446	443	442	442	442	444	444	444	444	442	440	434	434	436	441	442	443	451	454
505	505	504	502	506	506	498	482	470	461	452	449	443	446	443	449	447	457	458	459	459	451	451	452	456	457	458	463	464	465
561	555	557	556	555	554	550	538	531	523	519	516	515	514	515	516	517	518	519	520	518	517	514	512	514	516	518	520	523	524
566	563	564	564	564	561	565	549	549	537	531	530	529	528	529	530	531	532	532	535	537	536	531	527	530	532	532	534	535	536
625	625	627	626	626	627	624	623	615	613	609	609	606	606	607	607	607	605	607	608	607	607	607	604	602	603	603	606	607	607
741	737	737	738	739	740	739	738	739	732	727	724	721	721	721	721	721	720	722	722	723	724	724	723	724	725	727	729	728	730
780	778	781	781	782	784	785	786	786	786	773	771	767	767	768	766	765	765	765	765	766	766	766	766	766	766	766	768	768	768
828	825	827	834	832	833	837	837	834	828	822	811	802	797	794	793	796	788	779	781	785	785	790	783	787	788	792	792	797	801
828	825	827	834	832	833	837	837	834	828	822	811	802	797	794	793	796	788	818	821	825	826	826	829	821	824	832	832	835	836
546	539	544	542	540	537	536	523	514	498	492	484	478	476	477	481	484	493	494	495	495	493	495	492	492	493	493	493	495	497
602	598	599	598	595	595	593	592	572	564	555	551	550	549	550	551	551	554	558	562	558	555	554	549	551	552	551	551	554	555
629	625	625	624	625	625	624	628	611	605	596	583	579	578	579	581	582	583	586	586	586	588	592	592	591	593	593	597	600	605
646	641	642	643	643	644	644	646	639	632	625	623	623	623	624	623	625	625	626	626	627	626	625	623	622	623	622	622	623	624
671	670	670	670	670	673	672	669	659	652	648	644	646	640	644	644	646	645	645	647	651	651	651	650	650	646	645	646	646	646
693	693	696	696	695	696	695	695	687	682	679	677	669	670	672	672	672	672	674	674	677	677	677	677	678	674	674	674	674	674
714	720	720	725	721	723	723	725	717	712	705	703	697	695	693	693	694	695	695	697	697	696	696	696	702	703	697	701	701	701
832	834	835	837	839	834	840	840	842	837	832	831	829	821	817	819	820	821	826	826	826	826	827	831	832	834	828	837	837	837
793	799	801	803	806	804	800	814	810	802	800	793	791	787	783	781	781	785	786	786	787	789	786	781	779	778	778	781	783	783
748	752	751	752	754	753	756	754	754	745	738	737	738	731	726	725	727	726	722	733	727	727	728	727	727	726	725	728	731	731
705	708	708	708	708	712	713	713	712	709	698	676	674	668	667	666	673	673	673	676	683	682	677	672	668	670	675	675	677	677
687	683	683	683	684	687	688	686	686	683	675	660	0	649	0	640	644	647	649	653	644	655	653	651	649	652	651	653	656	655
671	668	665	665	663	666	666	666	659	645	640	630	621	621	618	617	615	617	620	619	623	628	624	616	614	616	619	619	623	624
636	633	634	633	633	634	635	635	625	620	602	590	584	580	578	582	584	589	592	594	594	598	588	589	583	584	582	587	593	597
585	585	585	586	586	586	595	574	566	563	544	534	535	537	536	545	542	545	548	556	557	549	545	549	546	547	551	554	560	562
494	486	484	487	488	484	476	465	453	450	444	422	428	426	427	429	431	434	438	439	437	439	439	437	437	439	440	443	444	447
527	525	525	526	523	523	517	505	492	483	474	466	460	459	459	461	463	466	470	473	476	472	471	469	470	470	470	474	476	478
540	536	538	539	541	546	534	524	516	507	497	487	492	493	494	497	500	505	507	513	514	511	506	504	509	509	508	509	512	514
630	631	627	626	627	625	625	623	616	605	590	581	571	566	566	571	571	576	579	584	584	586	582	582	579	580	586	587	592	598
489	483	481	483	481	480	481	468	452	444	432	428	420	418	415	415	419	421	428	432	444	439	435	436	428	426	426	431	438	448
494	499	497	493	492	495	483	480	464	458	446	440	441	434	437	439	442	447	451	452	452	452	452	448	447	443	449	446	452	455
463	466	467	467	466	465	459	449	441	429	420	418	417	412	410	416	420	435	434	434	436	432	430	429	423	423	425	431	439	446
437	429	438	447	446	446	447	417	412	406	392	388	390	386	389	391	395	403	408	407	404	402	405	397	397	399	403	404	412	420
54	56	54	53	48	45	49	53	53	58	65	69	64	59	57	54	52	53	54	57	58	59	58	58	59	56	57	56	53	55
12	16	14	16	15	12	15	16	24	34	33	34	32	31	33	29	27	26	27	27	29	28	27	26	25	24	23	23	21	20
1018	1022	1028	1034	1043	1055	1058	1058	1055	1051	1049	1041	1028	1026	1023	1019	1022	1023	1020	1012	1004	1006	1008	1013	1019	1022	1022	1023	1018	1018
1042	1049	1052	1057	1065	1074	1077	1078	1071	1067	1061	1055	1046	1039	1039	1041	1044	1046	1044	1044	1040	1040	1042	1043	1047	1056	1061	1062	1058	1057
1079	1081	1085	1093	1096	1101	1107	1106	1097	1097	1097	1093	1077	1067	1070	1067	1069	1074	1073	1070	1064	1064	1062	1073	1075	1077	1084	1091	1095	1099
1122	1131	1136	1133	1134	1138	1143	1144	1144	1144	1144	1132	1127	1124	1120	1115	1116	1120	1121	1118	1119	1119	1114	1116	1121	1127	1128	1132	1136	1135
1065	1071	1071	1071	1076	1076	1077	1077	1077	1072	1072	1066	1061	1052	1054	1054	1057	1057	1058	1059	1058	1054	1058	1058	1056	1058	1066	1072	1075	1075
1011	1013	1016	1020	1024	1024	1026	1025	1024	1023	1020	1013	1008	1005	1006	1007	1011	1012	1009	1008	1011	1012	1014	1016	1018	1023	1026	1028	1029	1028
1019	1020	1021	1022	1024	1025	1026	1026	1026	1025	1025	1021	1015	1014	1013	1013	1013	1013	1016	1015	1011	1012	1012	1013	1017	1018	1019	1021	1022	1022
972	969	971	972	972	973	974	974	972	970	969	960	956	954	953	954	955	956	953	963	956	957	958	959	960	961	963	966	965	965
990	989	990	991	992	991	991	991	992	989	983	981	980	977	975	976	976	976	974	973	973	974	974	973	974	977	978	980	980	980
981	974	974	975	977	979	979	977	976	980	975	971	973	970	968	967	966	966	965	964	966	963	962	963	964	971	971	972	975	975
940	945	944	945	948	948	949	950	951	958	947	943	939	934	931	931	931	928	928	926	923	921	924	926	926	933	942	946	941	944
919	920	925	926	925	925	925	923	922	920	919	919	914	913	911	914	914	911	910	913	905	905	907	907	906	909	914	919	921	919
888	889	891	898	894	893	892	893	891	898	897	887	889	888	888	889	888	874	875	870	864	864	869	873	876	879	883	884	884	884
1007	1011	1012	1014	1015	1016	1016	1016	1015	1013	1013	1007	1005	1004	1001	1000	1000	1000	1001	1002	1001	1003	1004	1005	1006	1009	1013	1015	1016	1018
1091	1090	1091	1092	1096	1095	1095	1094	1095	1096	1097	1096	1092	1092	1091	1090	1089	1088	1089	1088	1096	1091	1089	1098	1094	1095	1095	1095	1094	1094
943	944	943	946	948	943	948	949	949	942	938	947	947	937	940	937	939	939	937	940	937	934	934	935	936	942	942	944	946	946
973	982	983	985	987	989	989	989	987	986	983	976	974	973	971	970	969	969	968	967	971	965	965	967	971	976	982	984	987	989
837	840	839	840	840	840	840	839	840	838	835	833	828	829	829	829	831	830	829	827	831	824	824	826	828	828	829	830	830	832
867	869	867	871	873	871	871	870	871	869	866	864	862	860	860	859	860	860	860	862	864	862	862	864	863	863	866	868	868	868
872	866	867	868	869	872	873	871	875	871	871	873	871	871	870	871	869	864	863	860	861	857	859	858	861	861	866	865	864	866
938	935	935	936	936	936	937	937	938	933	932	934	939	939	937	938	939	936	936	935	931	927	925	923	922	922	924	924	923	924
892	897	896	896	896	896	897	896	896	894	894	896	896	896	894	896	897	898	899	897	894	892	893	893	893	896	896	898	899	901
1063	1058	1059	1061	1063	1064	1064	1065	1066	1068	1069	1067	1064	1063	1060	1057	1057	1055	1055	1054	1057	1054	1056	1056	1065	1069	1070	1069	1067	1067
1100	1097	1099	1100	1101	1102	1101	1101	1101	1101	1102	1100	1097	1095	1094	1095	1094	1094	1093	1095	1096	1097	1104	1099	1099	1098	1098	1098	1097	1098
1040	1037	1037	1039	1039	1040	1040	1039	1039	1039	1037	1036	1035	1034	1032	1032	1031	1030	1030	1030	1030	1028	1029	1031	1032	1033	1035	1036	1038	1037
1011	1014	1014	1014	1015	1015	1016	1016	1015	1016	1014	1012	1006	1006	1002	1000	998	998	996	994	992	992	991	990	997	995	999	1001	1000	1003
1042	1045	1046	1047	1047	1047	1047	1047	1049	1052	1053	1055	1053	1051	1051	1049	1046	1042	1039	1040	1040	1040	1040	1035	1040	1048	1051	1054	1056	1059
1005	1001	1006	1008	1009	1011	1011	1013	1015	1013	1015	1014	1013	1015	1015	1014	1013	1013	1012	1016	1012	1011	1014	1011	1012	1016	1018	1019	1021	1021
976	976	975	975	978	978	979	981	981	982	980	977	978	980	978	978	977	976	977	975	978	972	977	975	971	971	976	978	980	978
955	951	950	950	951	950	952	956	957	953	952	957	951	954	956	958	959	960	960	959	955	955	956	954	953	957	957	958	962	963
920	921	913	915	914	914	915	915	919	917	913	911	905	914	901	900	903	908	910	910	910	919	912	910	911	912	914	918	920	920
993	997	997	998	998	996	993	993	993	993	993	992	992	992	991	992	990	989	989	988	986	984	983	980	982	984	989	994	994	994
1033	1036	1026	1029	1028	1025	1026	1026	1030	1031	1031	1031	1031	1031	1036	1037	1039	1041	1038	1038	1038	1038	1036	1034	1029	1028	1029	1034	1034	1038
1064	1063	1063	1063	1062	1062	1058	1059	1060	1061	1061	1065	1065	1065	1064	1064	1061	1061	1061	1056	1053	1052	1054	1055	1055	1057	1057	1058	1064	1063
1096	1097	1097	1095	1094	1094	1094	1094	1094	1095	1095	1096	1097	1097	1096	1093	1094	1091	1089	1089	1089	1088	1088	1089	1088	1095	1095	1095	1096	1095
1067	1069	1070	1069	1065	1064	1066	1065	1065	1067	1069	1067	1067	1069	1071	1075	1076	1078	1075	1072	1065	1067	1067	1069	1067	1066	1066	1071	1073	1073
936	939	935	935	935	936	936	935	936	935	930	929	935	929	925	921	921	925	926	926	926	928	921	924	925	920	926	930	931	932
901	901	902	903	904	902	904	903	901	897	896	895	894	891	891	890	891	890	891	892	892	892	894	894	894	894	896	898	897	896
912	912	913	913	913	913	914	915	913	913	912	910	907	905	904	904	904	904	905	907	908	910	912	910	909	909	910	912	913	913
955	953	952	951	953	952	952	951	951	953	950	950	947	947	945	946	945	945	945	945	948	944	943	942	947	947	946	947	948	949
985	984	983	977	977	979	978	978	978	979	981	977	977	975	974	975	972	971	970	970	971	971	972	972	974	971	976	980	982	983
1008	1012	1011	1010	1010	1007	1006	1007	1007	1007	1006	1005	1003	1001	999	999	1000	998	999	998	998	998	998	997	999	1000	1004	1009	1010	1010
1044	1044	1042	1042	1040	1039	1040	1040	1041	1043	1043	1043	1037	1037	1040	1041	1040	1037	1040	1037	1037	1036	1034	1036	1035	1039	1042	1042	1043	1039
1073	1065	1072	1067	1060	1057	1067	1072	1067	1069	1076	1068	1067	1067	1061	1059	1054	1053	1051	1053	1066	1067	1067	1073	1073	1079	1075	1074	1073	1065
962	957	955	955	958	958	957	960	961	960	959	953	948	946	948	948	945	945	944	945	945	945	952	951	952	952	958	963	963	963
932	926	928	929	933	934	934	935	930	933	933	928	923	922	920	919	919	918	920	920	918	920	921	918	920	922	923	928	932	933
987	987	982	982	985	985	985	985	985	984	984	984	0	979	970	970	969	968	969	974	977	980	980	984	984	986	991	994	999	1000
1057	1058	1048	1052	1053	1050	1053	1054	1053	1056	1056	1062	1068	1059	1053	1048	1044	1043	1046	1045	1045	1051	1055	1055	1054	1063	1067	1073	1079	1079
1049	1049	1029	1032	1035	1035	1038	1040	1038	1038	1037	1037	1030	1030	1027	1023	1022	1021	1023	1024	1028	1028	1029	1030	1032	1035	1039	1042	1044	1044
990	999	996	998	999	999	1003	1002	999	997	996	992	990	984	979	976	976	978	980	979	970	962	960	955	955	960	967	973	964	964
1014	1017	1019	1019	1015	1016	1017	1020	1019	1019	1019	1021	1013	1008	1008	1004	1004	1004	1004	1009	1008	1008	1012	1012	1013	1013	1015	1020	1020	1020
900	895	900	898	896	897	896	903	906	900	893	886	880	883	881	880	874	881	886	892	891	891	896	891	885	890	895	899	904	903
806	801	802	804	803	802	802	802	803	799	800	790	784	782	785	785	786	786	787	789	795	797	799	791	794	794	800	804	808	809
821	816	813	816	816	814	821	827	821	817	804	805	803	796	795	797	798	798	799	799	802	804	802	800	803	805	813	817	817	817
853	854	852	857	852	858	860	865	854	849	848	840	833	837	840	835	844	838	849	856	863	862	859	859	858	852	859	865	868	872
740	733	731	733	740	740	740	746	737	732	709	705	703	705	706	706	706	707	707	708	712	714	715	706	700	700	700	712	712	712
788	791	797	797	794	799	804	803	799	799	784	777	774	771	769	768	766	767	767	767	770	773	773	770	770	769	770	772	778	779
766	763	767	769	773	771	771	772	773	774	764	737	735	737	734	734	728	732	732	739	743	741	741	735	733	739	739	740	744	748
723	724	724	717	717	717	717	722	722	717	695	687	685	678	674	670	667	670	669	672	672	672	672	678	678	679	682	687	689	689
731	732	732	739	741	744	744	743	743	732	724	717	703	703	694	694	692	688	688	691	694	697	697	699	703	704	709	713	713	713
694	690	687	684	683	684	685	687	682	675	662	658	651	647	644	639	636	634	638	638	642	638	638	645	648	652	654	658	660	662
650	653	653	652	650	652	652	656	652	640	629	623	618	612	614	616	618	617	619	617	615	608	613	606	605	607	616	618	627	626
521	521	523	529	527	526	523	511	499	493	482	468	472	471	473	476	473	481	487	484	483	481	478	473	476	475	481	473	492	499
570	567	571	573	572	573	569	555	547	540	523	510	514	514	513	517	520	526	528	531	522	517	518	515	514	517	523	527	533	536
600	598	593	590	590	591	591	594	584	567	557	547	539	543	545	548	549	549	553	554	558	549	543	548	547	554	565	569	582	581
610	612	620	622	609	611	612	609	598	598	580	575	573	586	585	584	582	577	582	583	574	569	573	579	579	583	585	588	593	592
568	570	574	568	573	571	567	555	547	539	533	525	520	529	537	537	531	532	539	533	532	531	534	541	534	537	544	547	545	553
534	541	542	543	549	550	542	527	514	508	513	503	508	512	509	510	505	511	515	507	510	517	519	511	515	522	534	541	549	554
35	30	28	25	23	22	21	21	32	32	35	41	42	41	40	42	39	39	38	36	40	39	40	39	40	39	38	36	35	34
84	82	87	87	84	76	73	68	69	78	87	84	87	87	83	80	80	84	84	80	76	80	82	84	84	92	95	95	94	91
68	72	74	75	79	77	74	70	72	73	85	86	91	93	91	92	89	88	89	84	89	87	81	77	77	76	76	75	75	75
102	98	99	99	100	96	95	94	96	102	103	102	114	113	112	109	108	108	106	101	102	101	101	102	101	99	98	98	97	97
101	102	104	105	105	103	101	105	111	110	109	109	108	108	108	108	106	105	106	106	99	98	101	98	95	97	97	95	94	92
135	135	136	137	137	133	127	131	132	134	135	137	137	138	137	137	136	133	138	134	129	135	137	138	136	137	136	136	135	134
188	193	196	199	204	201	204	202	200	200	198	194	191	188	191	193	195	196	200	198	202	199	203	201	204	206	205	206	206	206
187	186	187	187	191	191	193	194	195	193	193	193	191	189	189	189	190	190	194	191	191	194	191	191	192	194	194	195	196	196
233	236	236	237	240	241	238	241	242	235	231	225	223	221	220	220	221	222	221	226	228	228	230	234	233	234	234	234	236	236
236	241	247	248	248	248	243	245	248	248	235	0	0	0	0	0	0	217	219	223	228	228	232	232	233	234	234	235	235	237
255	258	263	267	267	265	269	272	281	271	266	257	251	244	243	243	241	241	242	248	249	255	256	258	260	261	261	262	263	265
277	279	283	285	284	284	287	288	293	291	286	279	269	261	263	261	262	263	265	266	272	277	279	280	282	283	283	284	285	286
298	305	311	315	312	311	311	319	319	316	307	301	295	291	287	287	286	288	294	294	298	300	303	307	306	307	309	312	312	313
389	392	405	400	396	395	393	393	391	380	370	364	365	362	361	360	361	367	370	369	368	369	373	373	376	379	380	382	385	384
426	421	432	433	426	426	426	427	416	412	397	396	396	396	397	398	399	404	407	408	400	399	399	402	407	413	415	418	422	418
461	468	476	477	476	473	476	472	459	456	445	444	440	433	434	437	437	444	444	448	448	446	450	452	449	455	465	475	480	477
514	522	519	515	512	512	517	511	506	504	489	483	485	483	478	481	486	489	496	497	503	491	495	496	498	508	510	515	520	520
554	561	565	568	569	571	565	564	555	548	536	534	533	533	531	534	538	542	544	545	545	539	543	545	547	550	553	555	558	562
623	619	620	616	619	621	619	614	603	596	589	586	588	586	586	588	591	592	593	595	596	595	594	594	595	598	608	608	608	612
679	679	676	676	675	677	678	674	663	663	645	637	641	639	645	645	652	652	652	659	656	653	653	653	650	650	649	649	651	657
27	29	29	29	29	27	29	29	36	38	42	48	46	46	46	45	46	43	46	42	35	35	40	38	40	38	38	35	34	32
127	128	129	133	133	133	132	136	137	139	144	144	144	143	144	142	142	143	141	141	139	133	128	123	121	121	120	121	122	123
173	172	172	172	174	173	173	181	176	175	176	176	183	174	174	173	173	174	173	171	170	171	168	172	170	171	171	173	171	170
202	202	202	203	203	204	201	206	205	211	209	211	212	207	207	206	206	206	205	206	206	210	209	211	210	210	209	209	211	212
819	817	807	809	809	809	810	810	806	807	802	794	794	799	800	794	796	799	800	808	814	818	812	803	803	804	812	817	819	825
785	779	767	763	770	777	779	779	771	774	771	757	757	763	763	762	761	764	769	779	782	784	778	777	779	777	781	780	788	796
755	749	741	739	742	747	748	752	754	750	745	739	739	740	740	740	741	743	746	750	758	762	762	757	757	755	755	759	761	767
720	714	709	709	708	706	708	711	711	710	705	704	694	696	702	706	707	707	712	714	717	717	720	723	716	715	718	720	0	720
698	695	690	690	690	691	693	692	693	686	685	675	674	674	675	680	683	682	683	683	684	685	685	685	685	683	684	688	690	690
638	638	635	637	638	640	639	639	634	626	617	609	609	609	609	607	612	614	614	617	618	619	619	621	623	623	623	628	630	634
502	507	506	503	502	505	509	512	504	497	482	478	475	474	473	470	471	474	477	478	479	475	471	477	480	486	489	496	491	493
474	475	478	480	480	480	481	478	474	479	461	457	454	450	447	448	449	451	453	451	449	446	446	447	450	452	455	460	464	466
26	20	21	19	21	22	20	21	32	33	35	37	41	42	42	42	43	43	43	44	44	50	50	50	51	52	50	51	50	50
74	72	72	72	72	72	72	72	72	78	85	88	88	86	86	79	79	79	79	76	76	77	76	79	82	81	77	77	76	75
109	117	117	114	114	113	115	116	116	124	126	126	123	119	117	117	116	116	117	119	118	118	118	111	113	114	115	113	115	115
166	168	168	169	169	171	166	163	163	169	171	173	175	177	177	175	175	175	172	173	173	173	172	173	174	175	176	177	179	179
80	81	80	80	80	81	83	78	78	79	84	94	96	96	98	98	100	99	97	92	92	92	87	87	89	88	88	87	83	83
49	57	58	60	58	58	60	60	62	62	64	68	72	76	78	77	80	69	65	65	65	67	66	74	73	73	66	74	73	72
12	14	15	16	15	17	17	20	19	27	30	35	37	38	37	31	32	31	30	30	30	30	30	32	32	32	33	34	31	32
79	80	81	82	84	85	85	84	84	86	87	91	87	92	95	95	95	94	93	92	93	90	92	93	92	92	94	93	92	91
101	103	105	102	101	100	103	105	108	111	113	112	110	112	112	111	110	109	107	105	109	108	110	111	108	106	108	104	105	105
140	137	138	141	141	141	142	141	146	145	145	145	144	145	144	144	142	141	140	138	143	138	139	139	139	138	138	138	137	136
139	140	139	139	139	139	139	139	139	146	150	152	154	156	161	156	153	152	150	156	153	153	144	145	145	145	146	147	149	149
154	151	155	147	155	151	149	147	154	158	159	158	158	160	160	160	164	162	161	162	162	162	162	162	162	162	162	162	166	168
177	177	174	174	172	170	169	166	168	181	180	183	183	184	184	185	185	185	184	183	183	183	183	184	183	183	184	184	182	185
211	214	211	210	213	205	206	197	213	215	215	216	216	218	219	218	217	216	215	217	222	220	219	219	218	218	219	219	220	221
255	252	254	256	257	256	260	260	262	262	262	262	260	258	258	258	258	255	258	255	255	258	259	265	265	265	265	265	267	270
291	291	291	290	291	289	295	294	292	291	290	290	289	286	288	284	284	287	289	288	288	288	289	289	289	291	292	293	294	295
331	333	338	337	333	325	332	334	335	334	327	324	319	319	313	314	314	313	315	320	319	313	315	312	312	314	314	316	317	319
318	324	327	328	324	316	324	325	330	323	314	305	303	304	304	307	306	308	308	313	314	318	316	315	315	309	309	313	321	322
365	365	376	376	370	371	378	376	373	374	374	366	355	355	355	354	363	354	351	354	356	353	356	362	363	360	362	366	370	370
413	420	417	425	422	425	433	420	416	410	404	398	396	396	395	394	397	397	397	398	396	396	399	402	403	404	406	410	414	417
395	402	405	407	407	410	411	407	403	400	397	396	392	386	385	386	388	387	387	390	385	392	386	390	393	396	398	402	406	405
454	455	460	454	457	459	459	457	452	446	444	434	440	430	431	433	430	433	441	439	434	436	436	432	434	436	436	440	443	446
505	508	507	509	511	510	512	512	508	498	495	493	491	486	481	481	478	480	478	478	478	476	473	472	474	479	483	489	490	491
563	566	564	564	565	566	557	566	566	566	558	552	549	549	548	545	546	547	547	548	548	547	542	546	545	546	547	547	547	549
606	607	615	614	616	618	617	618	618	613	605	603	602	599	600	601	604	604	601	601	604	606	601	601	606	605	604	608	610	613
700	696	695	694	697	703	705	703	703	702	686	676	672	674	674	674	674	677	677	683	688	690	694	694	694	694	694	693	693	692
681	681	685	686	690	692	692	692	695	684	673	665	663	663	662	660	660	660	660	664	670	676	677	671	664	667	668	670	676	681
739	735	734	733	733	735	736	736	739	738	731	720	716	712	712	712	712	715	717	720	724	727	728	732	730	729	728	731	733	746
765	764	765	762	763	761	765	765	765	765	765	754	742	742	741	740	741	743	747	749	749	751	753	753	753	755	757	757	759	771
258	260	261	260	259	259	258	260	263	265	264	261	262	262	262	261	260	259	259	261	263	264	264	265	264	264	263	264	264	263
294	295	288	287	285	292	291	291	292	294	285	285	283	284	283	282	281	280	282	271	290	291	290	284	285	286	286	286	287	287
436	429	433	442	440	440	442	443	439	445	437	435	440	437	430	429	433	433	435	431	429	429	430	427	430	431	431	433	436	438
492	493	495	498	501	504	502	504	496	494	493	490	486	482	477	473	472	475	476	477	475	471	464	466	469	465	470	475	479	483
792	790	788	788	787	788	789	793	793	788	783	775	772	768	767	767	766	767	768	771	773	775	776	777	773	776	777	780	779	783
812	811	807	809	809	809	809	811	818	817	813	804	802	807	804	801	797	798	802	805	806	809	809	808	805	808	809	815	816	824
820	820	818	818	819	818	822	817	819	821	819	818	811	812	816	809	809	813	813	814	813	815	815	817	817	817	818	819	821	826
789	789	786	782	782	779	779	781	783	787	790	790	789	788	788	788	788	788	789	791	791	791	791	792	793	793	793	794	794	796
814	813	813	813	813	813	813	815	815	820	820	820	820	817	812	812	812	811	811	817	820	820	821	822	821	817	811	813	814	817
768	765	761	761	761	761	763	763	762	763	763	756	756	755	755	754	754	753	753	756	758	758	759	759	759	759	759	759	759	765
738	738	734	734	734	735	739	738	735	726	722	713	712	712	712	707	708	713	713	713	713	714	714	712	712	712	712	716	723	723
651	652	655	658	658	658	660	663	663	664	661	652	652	650	653	652	656	656	656	659	653	655	654	649	645	646	646	648	653	655
718	716	717	717	717	717	716	717	714	711	708	711	712	712	715	715	717	716	717	719	718	716	713	713	714	712	715	715	717	720
622	623	623	623	624	624	624	627	626	626	623	616	618	618	618	618	616	620	620	618	617	615	615	617	617	621	621	622	623	628
599	599	601	603	603	603	605	602	602	600	601	601	599	599	597	587	586	591	584	584	583	581	580	580	581	582	581	582	584	583
538	538	545	548	549	549	551	549	545	544	538	537	537	536	534	531	530	530	530	529	528	527	527	529	529	528	529	531	531	533
677	673	674	677	678	678	680	680	680	682	683	679	677	677	677	677	677	677	679	681	690	690	687	685	683	680	680	680	681	684
504	503	505	508	510	511	511	510	510	504	501	503	502	500	499	496	496	495	495	496	498	497	493	494	493	495	497	498	500	502
474	484	488	491	494	496	497	497	491	487	489	487	489	488	486	487	486	485	485	484	484	482	482	482	483	485	487	488	490	491
516	512	516	518	521	522	519	526	526	526	519	516	517	515	515	515	514	513	514	514	514	513	513	511	516	516	517	518	519	521
264	263	265	264	267	265	265	265	269	274	277	277	273	272	271	268	266	264	265	266	267	269	266	266	266	266	265	266	265	265
200	214	207	215	217	217	217	217	214	218	218	221	220	219	219	219	217	217	217	217	217	219	217	216	216	214	214	214	214	213
230	232	233	232	233	235	236	236	237	241	242	241	240	240	239	236	236	235	236	236	238	242	242	239	235	234	232	231	231	229
21	8	9	24	20	17	20	22	30	35	33	39	32	34	33	32	31	29	29	31	36	37	27	30	30	27	25	22	21	24
171	166	167	167	170	169	170	174	174	163	167	169	170	171	172	173	173	172	173	175	173	170	164	168	165	167	169	169	173	172
27	32	33	35	35	30	30	31	31	34	35	30	32	33	34	32	29	33	25	25	26	29	29	33	33	29	26	26	17	22
276	288	294	293	292	290	289	290	291	294	300	293	292	288	282	282	282	279	282	282	282	288	281	285	285	283	285	284	285	285
325	323	325	337	337	328	331	330	326	325	320	328	323	329	323	319	323	325	322	323	325	323	325	319	318	317	317	319	321	318
382	384	387	395	398	392	393	391	387	384	385	388	386	379	384	383	388	376	383	384	384	380	377	385	392	382	385	387	385	390
438	443	450	450	453	452	452	445	446	453	443	443	443	442	441	440	440	441	441	442	442	440	436	438	438	440	440	442	443	444
751	746	738	736	739	750	749	751	751	755	756	757	748	751	752	747	750	752	754	756	755	757	758	758	759	757	756	755	755	758
630	630	630	630	632	632	632	632	632	627	626	625	622	622	618	618	618	623	622	622	618	618	618	619	622	623	623	623	623	624
584	585	586	589	590	590	591	590	590	590	588	587	585	585	584	584	586	585	586	583	587	587	587	586	584	583	583	584	586	587
564	563	561	563	564	564	564	562	562	550	564	564	563	563	561	560	561	562	564	564	566	566	566	565	565	565	567	568	568	571
526	514	528	528	529	533	528	526	528	529	519	520	519	526	526	526	526	526	524	524	524	525	516	517	517	518	518	518	518	519
509	508	508	511	512	515	514	515	515	514	511	511	510	510	507	506	507	507	507	507	507	508	508	505	509	509	507	511	508	511
471	469	469	472	477	477	476	477	477	474	470	467	467	468	468	471	471	473	473	473	474	474	471	469	469	471	471	471	471	471
488	488	489	492	493	496	496	496	496	494	486	487	487	489	488	488	488	488	488	490	485	488	488	485	485	485	485	485	486	487
791	793	792	794	795	802	799	804	803	802	801	805	803	800	799	800	800	803	807	807	808	811	809	814	813	812	809	810	812	812
713	714	718	718	720	720	720	717	717	717	716	714	714	713	713	713	713	717	717	717	717	717	720	720	720	715	715	717	718	718
649	650	647	648	649	649	649	640	643	643	643	638	638	638	638	638	638	638	638	639	640	643	645	647	648	648	648	652	652	652
437	446	445	446	446	449	450	448	444	445	436	438	436	437	437	438	440	439	438	440	441	438	438	436	438	436	436	436	436	437
273	283	273	286	286	283	271	285	270	287	285	284	283	282	277	274	271	269	271	272	273	278	272	269	268	267	267	265	264	263
375	373	380	380	378	382	382	382	379	372	372	372	372	367	369	367	365	362	363	366	362	365	365	362	361	365	366	363	361	362
556	556	556	555	561	563	564	559	558	559	558	555	556	556	557	557	558	555	556	557	563	563	558	556	557	557	559	559	561	563
800	800	801	802	807	807	810	810	812	812	813	811	815	812	813	814	816	819	822	824	824	824	823	821	819	819	820	819	820	821
825	815	822	820	820	819	835	831	826	828	838	837	829	817	821	824	830	833	823	833	834	835	833	836	837	837	833	829	818	821
786	780	785	786	787	788	787	805	802	805	800	797	799	795	794	792	801	804	810	809	807	797	798	795	795	800	801	798	795	787
731	731	731	735	741	742	742	739	741	741	742	743	740	735	728	728	728	732	735	750	750	750	750	750	750	750	750	750	751	751
695	695	696	698	702	704	701	701	701	700	700	697	697	697	696	695	693	693	697	697	703	706	708	710	711	706	706	705	705	706
757	752	759	759	746	750	750	759	760	762	760	758	761	753	753	756	757	758	762	762	758	766	765	760	759	761	762	764	757	760
723	705	720	718	725	717	717	723	722	710	710	710	710	714	712	712	710	712	714	714	717	721	706	713	711	710	718	713	722	708
684	685	689	688	694	693	691	690	689	684	685	688	687	685	685	687	685	684	686	690	694	692	692	691	690	688	689	692	692	691
664	665	668	670	670	669	668	666	665	664	663	664	664	660	661	662	663	662	663	663	667	666	667	665	663	663	663	663	663	664
601	601	601	603	603	605	606	602	602	607	608	608	608	603	604	604	604	605	610	603	607	610	613	614	611	608	610	611	612	613
1045	1047	1049	1050	1051	1039	1035	1035	1033	1032	1032	1039	1035	1039	1040	1041	1047	1052	1058	1057	1051	1054	1056	1054	1050	1043	1044	1043	1044	1045
1005	1004	1004	1007	1007	996	995	991	989	989	990	994	995	995	998	1000	1004	1005	1010	1010	1008	1009	1012	1010	1009	1003	1003	996	999	999
954	943	944	947	946	942	940	940	940	939	942	942	942	942	944	943	944	945	948	948	952	952	952	949	949	950	948	947	943	943
969	969	969	975	974	967	965	967	966	964	963	967	967	967	969	966	966	966	969	971	970	973	973	971	968	966	966	964	962	961
899	901	899	904	900	901	904	900	905	906	906	906	906	904	897	898	898	904	908	905	910	906	907	907	906	908	908	907	903	905
584	588	584	584	586	586	586	589	591	593	586	587	587	590	591	591	591	593	586	596	595	592	600	598	603	599	600	600	603	603
508	509	510	510	511	514	513	512	513	512	512	512	513	514	513	513	514	512	512	512	514	512	511	509	509	510	510	511	512	512
551	545	544	549	548	549	553	552	552	552	554	555	557	556	553	551	553	550	554	550	551	560	553	553	561	560	551	553	556	555
544	546	547	547	551	553	553	552	551	552	553	548	554	552	543	541	541	540	543	542	546	543	543	542	544	541	542	541	541	541
626	627	630	635	632	634	633	636	636	636	634	632	631	630	630	629	629	630	628	631	633	632	632	631	630	630	630	630	628	630
470	467	468	468	468	467	468	468	468	467	467	464	466	465	465	464	466	464	465	465	467	467	464	464	463	465	462	463	462	462
514	507	505	506	502	501	506	517	519	519	519	519	518	518	516	517	515	517	518	517	511	512	512	511	510	508	509	507	507	507
468	462	466	465	461	463	463	474	471	473	476	475	478	480	480	479	481	479	478	477	477	478	477	475	471	470	470	471	471	472
432	435	434	432	434	436	436	437	439	441	440	438	438	437	435	435	434	433	432	430	432	433	433	430	431	432	433	431	431	432
243	250	251	257	258	243	243	243	245	247	246	243	245	244	241	236	235	228	227	225	224	224	224	224	225	224	223	223	223	223
243	250	251	257	258	243	243	243	245	247	246	243	245	244	241	236	235	236	239	239	242	243	246	248	248	243	243	243	241	237
61	63	63	65	71	71	70	70	72	72	72	74	78	78	79	79	78	75	75	75	75	73	73	72	66	65	65	65	65	65
5	1	1	1	1	1	1	5	5	8	9	9	6	8	8	11	7	5	1	1	1	5	5	5	5	1	1	1	1	1
12	6	12	10	9	9	11	8	8	8	11	12	1	1	1	1	1	10	9	10	11	10	9	9	6	5	6	5	6	4
129	129	134	131	126	126	126	126	124	124	124	123	121	121	121	121	129	121	116	111	111	107	109	109	109	109	111	113	113	112
55	51	53	55	52	53	55	53	46	53	51	55	53	54	53	53	51	49	50	51	50	52	51	51	50	49	48	49	48	48
110	99	101	103	101	103	101	100	111	101	103	106	108	105	106	105	107	106	104	101	103	107	103	103	102	103	101	103	102	101
179	177	172	176	176	176	172	171	170	176	172	171	169	167	170	171	169	169	168	159	159	159	159	159	159	153	153	153	159	153
202	197	203	203	201	195	200	195	200	202	192	189	197	186	185	187	188	187	183	179	179	178	181	179	178	178	177	178	178	178
174	170	176	181	184	183	181	184	183	185	179	181	179	179	180	180	180	175	173	176	176	176	176	177	177	177	177	174	173	173
295	297	295	300	303	308	310	311	311	317	319	318	317	317	317	314	314	316	320	317	317	316	312	311	314	311	310	309	307	309
31	35	35	35	39	39	39	39	39	35	37	36	38	34	42	41	40	38	38	40	42	44	46	43	45	44	45	45	45	45
126	128	129	132	135	136	136	137	135	138	136	137	136	134	134	132	131	131	131	132	134	135	136	135	134	136	134	134	135	134
94	102	103	106	106	107	107	107	110	110	109	109	108	106	105	104	104	104	104	106	109	110	111	110	111	109	108	110	110	112
209	210	213	217	219	221	228	228	237	242	241	237	233	228	225	225	222	220	220	220	221	226	228	228	227	225	225	221	221	220
239	231	232	235	239	232	234	243	246	249	247	246	243	240	234	231	230	230	226	222	218	219	219	218	219	221	221	220	220	219
152	155	157	159	160	161	165	169	170	171	170	170	173	166	165	162	161	161	162	163	165	169	170	169	168	168	167	165	165	164
179	179	182	185	187	188	191	188	198	198	197	197	198	195	193	193	190	189	190	189	191	193	196	195	195	194	193	190	191	188
256	255	255	258	258	258	261	268	273	275	273	273	267	262	258	258	254	254	266	254	258	257	258	254	261	262	262	259	259	260
52	55	54	51	59	61	61	60	57	57	57	55	54	51	56	51	46	50	49	54	54	57	57	57	56	57	57	59	54	58
13	8	4	7	7	5	6	10	4	3	2	6	1	1	2	1	1	1	1	1	1	7	10	8	8	8	8	9	11	12
131	131	129	132	133	131	133	132	132	135	139	140	138	136	136	134	133	132	135	138	142	146	151	150	149	151	155	156	155	154
199	195	198	197	195	193	200	198	203	207	207	206	200	202	196	192	191	189	198	186	188	187	187	188	187	187	188	189	190	188
180	183	183	180	180	178	178	183	193	189	187	185	181	186	186	176	176	175	175	176	181	172	169	169	172	172	172	172	172	173
130	131	129	126	130	130	133	135	133	135	135	133	134	132	131	129	128	127	127	128	129	128	128	128	129	130	129	129	128	128
103	102	107	106	107	105	106	106	105	105	103	106	107	105	104	102	100	98	99	102	103	104	101	101	108	108	106	103	102	100
18	18	17	17	11	16	14	14	12	2	2	8	5	1	5	4	1	1	1	7	3	8	6	3	5	6	9	10	9	7
96	88	90	88	89	88	82	79	78	77	75	77	79	79	81	82	83	83	81	82	85	84	85	86	89	90	91	90	89	91
287	284	285	287	290	290	293	299	301	305	301	305	299	295	291	285	285	286	286	288	288	285	282	278	274	272	271	272	273	271
231	224	227	228	231	233	241	240	244	254	246	243	248	247	239	242	244	240	240	238	236	235	239	237	237	238	237	238	237	234
178	178	178	179	180	178	177	181	185	189	191	191	194	192	191	191	191	190	192	194	195	195	195	194	191	188	186	185	185	184
220	222	222	228	228	228	224	226	233	241	239	239	243	243	238	232	233	235	240	242	239	242	242	242	239	239	237	237	237	240
367	370	363	360	361	361	364	362	363	367	385	379	378	381	380	375	373	372	371	371	373	373	371	372	370	372	369	370	370	369
457	456	452	456	457	454	462	467	469	473	474	470	470	466	465	465	464	459	459	463	465	463	463	460	457	457	457	458	459	463
510	502	503	500	509	507	511	520	521	524	526	527	526	524	522	519	518	522	518	516	517	517	518	518	517	517	516	516	515	517
464	460	459	463	463	469	475	480	482	485	486	486	486	480	479	474	473	468	469	467	467	467	467	465	463	465	464	463	462	462
701	694	704	703	695	704	707	713	713	713	710	704	703	699	693	690	690	686	692	687	689	690	693	690	692	693	689	691	685	687
28	29	28	24	19	12	7	9	3	4	5	7	11	14	15	14	9	10	24	24	27	19	26	31	33	41	44	42	42	43
28	29	28	24	19	12	7	9	3	4	5	7	11	14	15	14	9	10	24	24	27	19	26	31	33	13	12	10	5	5
116	111	104	102	101	99	99	95	87	91	94	96	102	103	105	105	106	102	98	98	102	99	100	97	99	98	98	97	96	95
196	198	193	192	200	204	203	206	206	202	206	202	205	206	199	197	196	191	195	191	191	187	181	184	187	186	184	188	193	184
181	178	179	191	193	192	182	187	178	179	184	189	193	192	189	196	198	196	198	193	188	185	178	176	175	173	183	184	176	172
167	168	161	166	167	166	161	163	163	163	161	165	169	173	172	169	167	165	165	162	164	163	158	158	160	157	159	159	162	162
143	146	144	144	145	146	146	141	141	139	139	140	144	146	143	144	142	137	137	136	138	138	133	133	133	133	134	136	134	134
820	819	816	822	826	824	825	827	832	834	836	833	834	831	833	833	832	837	841	841	842	841	841	841	840	843	845	841	836	835
114	121	117	126	126	124	132	132	124	117	121	129	128	127	129	134	132	139	134	120	118	112	110	115	116	113	112	110	110	110
71	64	64	64	65	58	57	51	49	46	48	52	54	57	55	58	60	59	62	61	49	38	36	43	45	52	46	42	42	42
47	46	42	49	57	51	44	41	37	29	31	39	41	48	46	49	49	49	48	50	44	44	37	36	46	62	59	49	46	45
103	89	102	96	97	97	98	99	92	94	94	96	107	104	106	110	111	113	114	109	106	103	95	90	92	95	92	87	83	86
237	239	238	244	249	248	256	258	254	254	251	251	243	233	236	230	228	225	231	229	228	226	224	222	224	225	228	222	214	223
265	275	275	276	276	282	282	285	284	283	283	285	283	282	277	274	273	273	274	277	279	272	273	273	275	275	274	274	272	274
319	315	316	318	319	319	322	330	323	328	323	321	324	321	319	316	314	313	315	316	314	307	306	305	307	305	304	306	306	305
379	380	380	377	380	383	392	393	396	399	400	399	403	403	400	396	396	393	392	394	394	394	394	394	394	394	392	396	394	394
445	445	445	445	445	451	454	459	467	470	470	468	467	463	465	459	458	455	452	451	453	447	447	448	450	452	451	451	450	449
830	810	819	827	827	827	832	833	831	826	839	835	837	835	840	844	846	836	840	841	845	849	841	846	845	844	845	843	844	844
765	761	761	752	764	767	761	767	760	757	758	761	771	768	760	756	751	752	756	753	754	758	761	762	759	765	760	764	763	763
777	779	776	777	781	791	793	795	793	792	795	799	802	804	801	796	792	789	789	789	795	796	795	795	797	791	798	799	805	805
702	697	697	697	701	705	707	705	703	701	701	703	701	699	691	695	693	684	681	677	682	685	695	692	683	695	697	695	702	703
616	616	619	621	623	625	627	625	625	626	627	628	627	626	623	622	622	621	620	617	617	620	620	619	617	616	615	618	618	620
650	651	651	658	658	660	660	660	658	659	660	661	659	659	658	657	655	653	652	651	650	653	654	655	655	655	657	657	659	662
283	284	283	280	277	282	275	275	277	287	287	282	286	286	281	283	284	282	284	283	286	283	285	282	283	283	283	283	281	283
298	289	283	285	281	280	287	292	296	286	289	297	284	293	290	283	288	295	297	296	295	293	293	293	292	288	285	285	282	283
402	404	407	405	406	413	414	418	420	423	426	430	432	431	429	428	429	431	432	430	427	426	423	422	421	419	418	418	418	418
481	483	484	485	489	496	497	504	515	516	515	520	517	523	511	515	505	510	502	501	501	497	492	493	496	494	494	492	492	492
580	577	579	582	588	588	591	589	591	592	592	595	594	593	593	591	590	590	588	588	587	588	587	587	585	585	585	586	587	586
669	670	675	680	685	690	693	694	692	693	694	695	692	691	689	685	684	681	680	679	680	686	690	692	691	691	694	695	703	705
699	704	713	712	716	727	734	728	729	728	726	733	734	727	726	717	718	713	709	712	719	725	732	732	730	735	735	742	749	749
728	736	740	730	742	745	755	755	752	749	750	754	756	752	750	746	740	736	735	732	734	739	741	742	746	751	750	750	759	754
690	692	697	716	705	710	708	709	711	715	717	719	720	717	717	714	712	711	711	707	708	712	711	713	716	718	718	719	722	723
651	652	659	665	665	667	669	669	671	674	673	673	673	674	671	669	669	669	669	668	674	674	675	672	674	676	678	679	678	678
611	612	625	618	624	632	635	637	639	641	642	644	645	645	645	645	646	644	644	644	644	645	647	648	650	652	654	656	658	660
555	563	555	557	560	566	569	572	575	576	575	575	575	574	570	569	569	568	569	569	571	571	572	573	571	572	571	570	569	568
586	583	561	590	590	597	601	607	611	612	611	606	605	601	602	600	599	599	603	604	604	606	607	606	605	608	604	604	602	602
365	369	369	370	370	371	375	376	378	380	380	382	383	385	385	384	382	383	383	383	382	379	377	376	375	374	372	372	373	365
385	383	383	382	385	386	392	394	399	401	401	405	407	409	408	406	408	409	409	409	406	402	399	397	396	393	390	388	388	388
218	218	218	215	214	219	219	221	221	219	216	221	219	220	226	220	225	228	228	240	236	239	223	228	230	221	242	240	219	239
5	1	2	2	1	0	0	0	0	0	0	0	0	0	0	0	0	0	0	0	0	0	0	0	0	0	0	0	0	0
322	319	317	323	320	323	326	327	331	330	333	333	340	336	330	325	320	327	327	319	325	324	318	318	322	324	316	314	315	316
171	171	179	183	181	175	169	168	167	165	165	167	170	173	175	171	173	169	170	150	150	147	146	149	152	160	148	147	138	139
143	148	148	156	158	154	149	148	142	143	143	152	146	154	150	152	150	157	154	141	139	137	132	131	133	140	137	133	127	127
182	181	184	186	187	187	186	190	177	189	183	184	181	184	181	185	188	191	202	199	179	192	193	191	196	193	192	191	187	183
160	161	161	166	166	178	169	168	177	166	183	184	164	161	158	156	159	164	164	169	175	172	167	163	172	163	160	177	158	166
109	110	116	125	124	121	123	120	122	125	125	124	119	117	119	116	125	115	109	104	108	100	91	92	97	94	96	93	90	93
5	1	1	1	1	1	1	1	2	1	1	2	0	7	1	1	5	5	6	8	5	3	1	3	8	9	7	3	4	8
41	41	40	42	40	40	38	38	38	40	35	42	41	38	33	35	44	39	36	27	21	21	21	21	26	26	25	20	21	20
116	0	117	121	130	124	122	116	111	119	112	109	112	111	107	108	107	108	109	99	96	102	101	100	99	94	89	80	75	77
243	248	247	248	256	254	258	258	258	262	258	260	257	262	260	262	257	257	268	265	264	265	258	256	252	256	250	253	251	259
330	327	325	331	330	331	328	333	337	339	340	344	343	337	339	340	339	338	341	340	340	340	337	336	333	332	329	330	330	328
514	513	513	517	515	519	523	532	532	533	540	536	536	536	535	535	535	534	534	532	532	534	534	533	532	533	532	535	535	535
507	508	508	511	514	514	518	519	520	522	523	524	524	523	522	520	520	521	520	517	517	517	515	514	514	514	514	513	512	512
457	460	459	460	463	467	473	481	483	488	488	488	493	486	483	482	482	481	481	480	481	480	480	482	483	482	479	479	478	476
553	556	555	558	560	561	564	564	563	565	566	568	566	568	566	563	563	562	561	561	561	559	560	559	558	558	559	559	560	559
587	582	584	583	587	592	596	596	596	599	599	599	601	601	602	602	602	600	600	599	597	598	598	598	598	597	597	597	599	599
536	539	541	541	540	545	549	549	549	551	554	556	553	556	556	553	549	551	549	547	547	546	546	533	547	549	549	535	535	550
482	487	487	487	484	490	494	495	497	503	503	503	503	503	503	498	497	496	495	497	497	497	496	497	497	497	495	495	495	497
500	502	502	501	501	505	509	514	515	518	518	520	520	522	520	519	517	518	517	516	516	516	516	516	516	516	516	516	516	517
533	540	537	542	542	545	555	548	552	552	552	550	550	559	559	557	558	558	558	557	550	558	559	559	556	555	563	562	562	563
477	476	477	477	481	482	484	487	488	487	487	488	487	487	484	484	485	485	485	485	486	488	487	487	486	485	485	485	485	485
436	435	435	435	441	446	454	458	462	467	469	474	471	471	471	471	472	472	472	472	472	473	470	470	473	473	472	472	472	472
577	580	576	584	586	579	582	587	589	588	585	585	584	585	583	581	579	578	578	578	578	579	580	579	580	580	581	583	584	584
418	416	418	418	418	423	424	426	427	429	429	429	429	431	432	431	431	432	432	434	434	435	436	433	433	433	429	430	430	433
499	494	495	500	502	505	510	514	516	518	518	520	520	519	518	518	517	516	517	516	516	516	517	519	516	517	517	516	517	518
619	617	616	619	618	619	622	624	625	628	628	626	625	627	627	623	621	620	621	618	617	620	618	618	620	620	623	629	628	626
533	529	529	533	540	540	545	544	543	542	541	541	542	539	536	535	533	535	536	535	536	538	540	539	537	536	535	536	535	534
635	637	638	640	644	648	651	652	653	654	652	652	651	650	649	647	645	643	642	642	642	642	644	645	644	644	646	648	649	647
426	431	431	433	434	436	439	440	441	440	440	441	441	440	440	439	438	438	437	437	438	438	439	439	439	439	440	439	440	440
467	460	460	462	469	471	475	477	472	472	472	475	473	475	476	470	469	474	473	473	473	471	472	473	473	474	474	474	473	473
452	446	447	447	449	453	455	456	457	456	457	459	458	458	458	457	457	457	456	456	456	456	456	456	456	456	457	456	456	456
477	467	469	470	473	474	476	474	477	478	476	477	476	475	474	472	471	472	473	470	471	469	470	469	468	468	467	468	466	466
413	408	410	411	413	414	413	414	419	420	420	421	420	417	419	417	418	414	416	419	418	418	420	422	421	418	419	417	417	416
400	401	400	405	400	405	400	402	405	404	408	414	409	412	406	406	397	406	405	402	404	408	406	410	404	410	414	406	409	411
389	386	381	381	381	382	385	386	380	380	388	390	0	0	0	0	390	392	392	391	392	393	391	390	389	386	386	388	385	387
507	506	506	507	507	513	516	519	521	521	523	521	521	522	523	519	0	519	519	519	520	521	521	523	523	0	523	0	527	527
440	441	441	441	441	442	443	443	443	444	445	445	445	448	450	450	449	449	452	452	451	452	454	450	450	450	449	448	448	449
570	572	572	574	580	583	583	584	587	585	584	584	584	584	584	583	577	581	580	580	580	580	580	580	578	578	579	580	581	581
543	544	543	543	546	553	556	560	558	558	556	555	555	555	552	551	549	549	549	550	549	549	549	549	549	550	550	548	548	548
447	449	447	447	447	447	451	451	451	453	453	453	454	454	454	454	453	453	453	453	453	454	456	458	458	457	457	457	457	460
530	530	530	532	534	539	543	547	546	547	547	547	547	547	549	548	548	545	547	547	546	545	544	546	546	546	547	549	549	549
727	726	727	731	740	739	743	735	735	740	738	742	742	743	741	735	734	732	728	728	729	723	732	733	734	737	739	741	739	746
776	772	777	764	777	781	782	784	781	784	781	784	782	786	787	782	780	776	780	777	776	781	778	779	783	778	783	785	790	792
616	614	618	620	630	633	635	636	638	638	637	638	640	639	637	635	633	632	633	631	629	631	633	632	632	634	635	638	638	637
911	908	921	915	928	929	929	937	931	924	923	921	908	905	899	893	891	891	893	892	894	900	905	896	892	888	889	894	892	892
871	877	879	883	882	884	882	874	876	870	868	868	868	869	869	868	869	869	869	867	868	871	877	879	877	879	881	885	882	882
699	700	701	702	708	713	714	717	715	715	715	715	715	715	714	713	711	709	709	708	709	709	709	711	713	714	718	721	723	722
732	733	737	742	741	740	740	738	737	738	739	740	740	737	736	735	734	733	732	731	731	731	733	735	734	735	738	737	737	738
679	682	680	677	691	700	702	696	693	693	690	692	697	696	697	694	692	691	689	683	685	680	685	685	687	689	689	697	697	697
675	674	673	675	681	684	686	689	687	689	687	687	687	683	684	682	680	678	678	674	672	674	677	680	679	679	679	680	685	682
848	845	847	850	848	846	845	845	843	842	841	842	843	843	844	843	842	841	840	839	840	843	844	844	844	844	846	849	848	847
809	812	810	811	810	811	810	811	812	812	812	812	812	813	817	816	814	812	812	0	814	816	818	821	821	823	823	823	825	825
751	752	752	755	755	761	761	765	760	756	757	757	757	758	759	761	759	759	758	758	756	755	755	772	757	760	758	758	761	762
634	634	635	636	641	641	643	644	645	644	644	643	642	641	638	637	635	636	635	634	631	631	632	632	632	634	633	638	640	640
757	752	755	761	762	763	766	767	767	767	766	766	763	762	760	759	756	755	755	754	754	755	756	756	756	757	757	759	762	762
803	803	807	807	809	801	807	804	803	800	797	801	800	801	799	797	800	806	799	795	797	800	797	798	802	802	801	804	804	802
827	823	824	828	827	825	828	829	830	832	832	833	834	833	834	833	837	831	829	829	827	828	833	832	832	832	834	838	838	835
788	788	790	793	796	798	799	798	798	796	796	797	797	795	794	792	791	790	790	788	788	790	790	791	791	792	791	794	795	794
865	872	863	865	863	869	881	868	875	875	868	876	872	869	0	0	0	0	0	0	0	0	864	861	862	865	883	886	889	0
931	924	919	917	919	920	927	925	918	912	908	908	900	902	892	0	0	0	0	0	0	0	0	0	0	0	0	0	0	0
937	942	953	950	944	943	935	934	935	931	927	926	932	929	928	926	927	925	920	923	927	936	935	933	931	931	932	933	932	931
951	962	970	977	974	968	972	972	972	971	971	973	968	968	970	963	961	957	958	958	966	969	973	974	979	981	979	979	981	980
919	923	929	932	931	935	932	925	928	927	927	931	932	933	939	941	935	930	932	934	937	941	952	951	948	947	947	948	950	949
1037	1047	1043	1047	1043	1044	1042	1039	1038	1032	1034	1034	1038	1040	1045	1050	1051	1049	1049	1049	1054	1060	1064	1061	1060	1067	1064	1068	1069	1067
1015	1012	1006	1010	1011	1009	1005	1002	1001	1000	1001	1004	1004	1007	1009	1009	1009	1009	1011	1011	1011	1011	1016	1018	1020	1021	1020	1022	1022	1023
1133	1133	1135	1134	1133	1127	1118	1117	1117	1116	1118	1117	1116	1118	1117	1118	1119	1121	1124	1128	1132	1132	1135	1135	1136	1137	1138	1136	1137	1141
1398	1403	1410	1403	1414	1416	1412	1414	1414	1412	1408	1402	1394	1395	1395	1396	1392	1391	1395	1390	1390	1393	1395	1393	1394	1395	1395	1396	1395	1395
1317	1317	1311	1307	1309	1300	1323	1327	1320	1325	1323	1323	1314	1308	1302	1296	1298	1303	1303	1302	1296	1299	1289	1300	1304	1308	1313	1313	1308	1306
1310	1308	1297	1295	1300	1308	1312	1309	1310	1307	1303	1299	1290	1285	1279	1273	1273	1272	1276	1279	1274	1277	1285	1281	1287	1292	1282	1282	1282	1277
1308	1299	1299	1300	1293	1302	1297	1308	1314	1318	1301	1294	1294	1302	1302	1301	1298	1299	1297	1297	1295	1293	1290	1288	1291	1293	1290	1295	1297	1305
1368	1360	1363	1371	1378	1382	1381	1379	1380	1378	1369	1368	1362	1363	1359	1361	1357	1361	1364	1365	1357	1359	1358	1353	1355	1356	1353	1353	1356	1347
1236	1233	1236	1243	1244	1246	1246	1239	1241	1236	1240	1233	1229	1225	1223	1226	1225	1224	1224	1226	1229	1231	1233	1231	1235	1241	1241	1239	1237	1241
1196	1197	1203	1206	1206	1206	1208	1201	1201	1204	1212	1210	1209	1203	1203	1201	1200	1198	1203	1207	1206	1206	1203	1203	1203	1212	1215	1211	1214	1210
1283	1287	1283	1286	1289	1291	1292	1290	1288	1286	1282	1290	1284	1289	1284	1279	1273	1276	1279	1279	1269	1266	1274	1271	1279	1282	1281	1285	1286	1281
1234	1225	1225	1227	1231	1237	1231	1229	1232	1233	1231	1227	1223	1220	1217	1215	1216	1212	1213	1214	1214	1215	1216	1211	1216	1221	1227	1229	1228	1230
1186	1181	1180	1178	1189	1186	1186	1177	1177	1173	1176	1172	1169	1166	1166	1165	1172	1170	1170	1180	1180	1178	1178	1182	1181	1180	1181	1184	1187	1188
1028	1027	1026	1026	1021	1014	1007	1004	1004	1004	1002	1004	1005	1004	1003	1003	1003	1003	1003	1003	1005	1006	1009	1007	1005	1004	1004	1002	999	997
1077	1076	1075	1071	1071	1063	1060	1060	1062	1059	1062	1062	1067	1067	1066	1067	1067	1069	1069	1074	1073	1073	1071	1071	1071	1070	1073	1073	1071	1071
1101	1098	1099	1100	1097	1096	1094	1088	1089	1089	1088	1090	1093	1095	1093	1094	1096	1098	1101	1102	1102	1105	1105	1103	1102	1103	1100	1097	1098	1098
1074	1074	1073	1074	1074	1072	1071	1066	1066	1068	1068	1069	1073	1073	1071	1069	1072	1072	1076	1076	1076	1078	1077	1076	1077	1071	1074	1069	1064	1066
1063	1066	1062	1062	1062	1059	1049	1045	1042	1041	1040	1040	1041	1045	1045	1043	1043	1045	1046	1046	1046	1048	1047	1050	1052	1053	1047	1047	1047	1047
1093	1088	1086	1086	1085	1079	1074	1073	1073	1073	1069	1073	1069	1076	1076	1073	1078	1081	1076	1078	1079	1078	1078	1076	1076	1080	1081	1085	1082	1083
1307	1312	1317	1318	1315	1323	1322	1324	1323	1323	1320	1321	1319	1319	1315	1317	1318	1316	1316	1319	1316	1317	1317	1314	1317	1319	1324	1320	1321	1320
1253	1252	1254	1256	1257	1257	1252	1246	1244	1247	1249	1251	1252	1251	1251	1249	1253	1253	1254	1251	1248	1249	1248	1245	1244	1244	1246	1247	1251	1251
1157	1150	1153	1152	1154	1161	1161	1152	1152	1155	1162	1164	1166	1169	1168	1168	1167	1167	1165	1167	1165	1163	1171	1162	1164	1165	1167	1165	1166	1166
1194	1189	1192	1193	1195	1193	1191	1191	1188	1194	1197	1196	1198	1199	1196	1192	1197	1196	1196	1196	1196	1199	1196	1198	1198	1197	1202	1202	1205	1204
1224	1221	1220	1221	1222	1225	1223	1222	1222	1222	1223	1224	1225	1225	1224	1224	1224	1224	1224	1223	1223	1224	1224	1220	1225	1225	1227	1229	1229	1231
1276	1269	1276	1278	1273	1283	1278	1279	1280	1279	1279	1279	1273	1278	1279	1280	1279	1279	1278	1280	1274	1271	1268	1266	1264	1267	1277	1269	1284	1278
1160	1159	1163	1165	1167	1165	1165	1165	1167	1166	1168	1169	1169	1169	1167	1166	1165	1161	1165	1162	1161	1161	1159	1158	1157	1159	1160	1161	1163	1161
1251	1248	1248	1249	1250	1250	1250	1249	1249	1250	1248	1248	1246	1248	1245	1243	1242	1240	1239	1238	1239	1240	1244	1242	1240	1246	1247	1249	1244	1246
1207	1199	1198	1201	1201	1204	1202	1197	1197	1198	1198	1197	1196	1197	1195	1193	1195	1192	1193	1193	1194	1194	1197	1194	1194	1199	1199	1199	1199	1199
1004	1010	1013	1014	1015	1008	998	996	997	1001	1000	990	993	994	993	992	990	986	993	1002	1006	1012	1010	1012	1006	1003	1015	1002	997	997
1124	1132	1139	1141	1139	1132	1123	1110	1122	1133	1124	1124	1126	1119	1116	1113	1113	1126	1131	1131	1133	1130	1125	1123	1135	1135	1123	1131	1127	1133
992	999	1010	1010	998	1015	1003	1001	1000	999	998	996	997	995	993	990	989	988	994	994	1002	1004	1011	1013	1014	1012	1012	1007	1008	1010
1027	1031	1040	1038	1037	1035	1025	1019	1027	1024	1021	1016	1013	1007	1008	1011	1008	1003	1003	1013	1015	1024	1022	1021	1026	1025	1019	1020	1020	1023
1057	1060	1064	1071	1073	1070	1066	1055	1055	1055	1052	1050	1046	1041	1038	1043	1040	1040	1040	1047	1053	1045	1060	1061	1062	1066	1061	1061	1062	1070
0	0	0	0	0	0	0	0	0	1140	1145	1136	1128	1126	1124	1123	1135	1144	1149	1165	1159	1156	1141	1143	1146	1148	1148	1147	1150	1150
1148	1148	1152	1157	1156	1153	1149	1147	1149	1152	1152	1152	1151	1147	1145	1143	1143	1144	1145	1147	1145	1143	1141	1139	1145	1151	1155	1153	1156	1154
1154	1159	1162	1166	1165	1166	1162	1164	1167	1169	1171	1170	1169	1167	1174	1174	1175	1175	1177	1178	1178	1168	1164	1162	1166	1171	1174	1173	1178	1181
1410	1409	1409	1410	1413	1414	1417	1416	1417	1416	1408	1416	1415	1415	1414	1412	1412	1412	1413	1411	1411	1412	1411	1410	1409	1410	1413	1413	1414	1414
1138	1136	1136	1139	1140	1128	1134	1139	1143	1148	1144	1142	1141	1145	1145	1142	1143	1145	1150	1153	1156	1155	1155	1149	1150	1146	1143	1142	1141	1138
1214	1214	1214	1217	1219	1221	1217	1215	1214	1216	1217	1217	1216	1216	1216	1215	1215	1215	1216	1217	1219	1220	1220	1218	1218	1218	1216	1214	1212	1211
1287	1288	1288	1286	1289	1289	1290	1291	1292	1292	1292	1292	1291	1290	1290	1290	1281	1277	1277	1276	1276	1276	1279	1279	1279	1269	1286	1286	1290	1287
1081	1081	1077	1071	1070	1061	1061	1075	1077	1077	1081	1082	1080	1080	1081	1083	1087	1089	1094	1095	1090	1088	1088	1086	1078	1072	1076	1077	1079	1082
1198	1204	1205	1206	1201	1196	1196	1201	1197	1203	1205	1202	1204	1201	1196	1193	1193	1196	1201	1206	1209	1209	1212	1212	1209	1206	1204	1199	1200	1200
1224	1229	1228	1226	1226	1225	1225	1225	1224	1223	1225	1224	1224	1223	1221	1220	1219	1218	1219	1221	1225	1226	1225	1226	1224	1222	1215	1223	1220	1221
1303	1303	1302	1301	1300	1299	1300	1298	1300	1299	1301	1302	1301	1300	1298	1295	1298	1299	1298	1300	1303	1307	1309	1311	1313	1311	1311	1310	1305	1302
1341	1336	1335	1333	1334	1334	1335	1335	1336	1335	1335	1334	1333	1334	1333	1334	1335	1334	1335	1336	1337	1338	1340	1341	1338	1338	1337	1335	1334	1333
1200	1196	1197	1200	1203	1202	1202	1205	1203	1202	1200	1198	1200	1198	1196	1198	1199	1200	1204	1204	1205	1206	1209	1210	1205	1200	1196	1195	1196	1196
1243	1239	1238	1239	1245	1241	1241	1240	1238	1234	1237	1240	1243	1243	1245	1245	1249	1250	1252	1254	1256	1257	1258	1258	1255	1253	1254	1253	1253	1253
1243	1239	1241	1240	1241	1242	1244	1239	1237	1242	1246	1246	1248	1246	1245	1242	1242	1243	1248	1249	1252	1254	1259	1258	1256	1256	1253	1251	1251	1251
1267	1278	1278	1277	1273	1276	1278	1277	1275	1280	1279	1277	1278	1281	1282	1282	1282	1282	1282	1280	1283	1283	1284	1284	1280	1277	1278	1278	1275	1274
1334	1329	1328	1329	1332	1335	1334	1334	1337	1337	1333	1327	1331	1332	1333	1333	1332	1331	1331	1330	1329	1327	1327	1325	1322	1324	1325	1329	1331	1330
1274	1272	1272	1269	1269	1269	1269	1264	1264	1265	1272	1269	1269	1269	1269	1269	1266	1264	1262	1262	1262	1265	1264	1265	1265	1255	1257	1256	1259	1257
1164	1177	1168	1162	1161	1154	1154	1154	1145	1155	1155	1155	1158	1159	1160	1163	1166	1169	1181	1184	1186	1181	1185	1174	1167	1165	1163	1159	1172	1163
1312	1311	1307	1311	1309	1308	1305	1305	1298	1306	1301	1302	1304	1308	1312	1309	1305	1308	1308	1308	1310	1310	1306	1306	1312	1310	1305	1305	1305	1300
1390	1391	1391	1391	1395	1403	1395	1402	1401	1399	1395	1392	1391	1387	1387	1387	1387	1389	1389	1389	1389	1389	1386	1385	1382	1382	1382	1384	1388	1389
1368	1368	1368	1371	1371	1375	1375	1377	1377	1375	1372	1364	1361	1365	1365	1367	1366	1366	1363	1362	1360	1360	1361	1362	1362	1362	1362	1362	1362	1362
1366	1366	1365	1365	1365	1367	1367	1370	1370	1373	1373	1371	1368	1367	1367	1367	1367	1367	1368	1368	1365	1367	1367	1367	1367	1367	1367	1367	1364	1361
1374	1381	1376	1375	1373	1379	1376	1376	1380	1379	1376	1376	1378	1378	1378	1376	1379	1378	1378	1378	1376	1378	1378	1380	1377	1376	1377	1376	1376	1376
850	849	850	844	844	843	846	849	851	848	841	840	847	840	838	834	835	839	843	850	855	850	847	840	838	840	845	851	856	862
857	845	852	853	848	850	850	852	853	851	850	847	854	856	851	848	853	850	853	856	860	859	855	854	846	853	857	857	860	868
977	972	969	968	970	973	976	980	981	978	982	983	981	977	975	975	976	981	986	991	990	989	987	983	978	976	978	981	983	986
1436	1438	1438	1437	1437	1436	1436	1434	1434	1433	1435	1433	1433	1431	1429	1428	1429	1429	1427	1428	1427	1429	1428	1427	1426	1424	1424	1425	1424	1423
1423	1423	1423	1420	1420	1420	1421	1422	1419	1427	1413	1407	1408	1422	1411	1412	1411	1413	1409	1409	1411	1417	1418	1416	1415	1411	1408	1413	1412	1412
1289	1287	1294	1288	1287	1290	1290	1290	1286	1283	1288	1289	1291	1293	1301	1301	1305	1305	1308	1308	1308	1308	1310	1308	1306	1306	1305	1305	1306	1306
1205	1210	1212	1212	1212	1210	1208	1207	1202	1202	1203	1206	1210	1208	1210	1212	1214	1215	1214	1211	1210	1208	1210	1209	1202	1204	1199	1200	1200	1202
1259	1259	1257	1268	1267	1267	1265	1264	1263	1260	1260	1260	1263	1265	1265	1265	1267	1267	1268	1274	1269	1269	1269	1269	1269	1269	1263	1263	1262	1262
1316	1313	1314	1311	1313	1313	1313	1313	1311	1310	1313	1315	1319	1321	1320	1321	1324	1326	1330	1330	1330	1331	1331	1330	1329	1325	1325	1325	1326	1328
1333	1327	1329	1330	1332	1334	1334	1334	1336	1328	1326	1328	1332	1333	1335	1334	1334	1337	1337	1335	1333	1336	1339	1334	1333	1332	1325	1330	1329	1330
1376	1375	1377	1382	1382	1383	1381	1381	1381	1377	1376	1380	1380	1382	1381	1382	1384	1383	1381	1384	1381	1381	1381	1378	1381	1381	1378	1375	1376	1376
1238	1252	1252	1251	1251	1252	1251	1253	1255	1251	1254	1252	1244	1253	1257	1255	1256	1252	1252	1257	1257	1251	1256	1257	1257	1252	1252	1251	1250	1250
1346	1346	1346	1346	1348	1344	1344	1344	1344	1346	1346	1346	1346	1346	1346	1346	1343	1338	1341	1343	1342	1342	1342	1342	1342	1342	1341	1336	1336	1334
1159	1159	1158	1158	1157	1162	1167	1166	1167	1166	1166	1166	1166	1166	1166	1165	1169	1170	1170	1174	1169	1171	1171	1173	1171	1162	1161	1158	1158	1161
1157	1159	1158	1160	1164	1166	1166	1160	1159	1162	1163	1165	1165	1166	1167	1166	1165	1165	1164	1164	1164	1163	1161	1160	1159	1158	1158	1159	1160	1160
1241	1242	1242	1243	1245	1246	1248	1247	1245	1245	1248	1246	1247	1249	1249	1249	1249	1248	1247	1245	1246	1244	1244	1246	1249	1244	1247	1249	1248	1248
1192	1192	1188	1188	1191	1191	1191	1188	1188	1195	1198	1198	1202	1200	1198	1190	1182	1182	1182	1190	1186	1186	1186	1188	1188	1191	1193	1197	1197	1198
1127	1127	1127	1129	1134	1134	1130	1133	1136	1134	1134	1134	1134	1127	1127	1127	1125	1125	1125	1129	1129	1129	1129	1129	1125	1122	1125	1129	1129	1129
1104	1109	1105	1105	1106	1109	1111	1114	1113	1115	1118	1116	1113	1108	1106	1104	1104	1104	1105	1108	1111	1110	1110	1108	1103	1099	1102	1106	1108	1109
1118	1116	1119	1120	1115	1118	1116	1116	1118	1120	1124	1123	1123	1113	1111	1108	1107	1107	1107	1110	1108	1109	1107	1105	1105	1110	1113	1115	1118	1121
1091	1091	1091	1091	1094	1096	1095	1098	1100	1099	1098	1098	1098	1090	1085	1085	1084	1087	1087	1087	1087	1088	1088	1087	1075	1080	1092	1095	1099	1101
955	959	957	957	953	958	964	955	954	955	964	964	957	957	950	954	953	951	958	950	950	957	957	961	955	963	965	964	964	961
959	0	0	0	0	0	0	0	0	0	0	0	0	0	0	0	0	0	0	0	0	0	0	0	0	0	0	0	0	0
1246	1233	1231	1230	1228	1229	1228	1228	1231	1235	1235	1234	1233	1234	1233	1231	1227	1222	1219	1218	1218	1218	1221	1235	1228	1236	1234	1236	1236	1235
1221	1215	1213	1209	1208	1210	1207	1208	1209	1209	1209	1211	1212	1210	1212	1209	1209	1208	1207	1207	1205	1205	1200	1204	1210	1212	1213	1214	1215	1216
1352	1376	1386	1374	1374	1389	1382	1388	1387	1389	1386	1385	1384	1391	1384	1391	1393	1395	1386	1386	1381	1386	1384	1385	1380	1392	1387	1386	1387	1384
1431	1428	1428	1428	1427	1427	1429	1429	1429	1429	1430	1429	1430	1431	1430	1430	1431	1434	1434	1433	1435	1436	1434	1437	1431	1429	1431	1427	1432	1428
1445	1445	1446	1447	1447	1446	1447	1446	1446	1446	1445	1447	1446	1448	1448	1448	1450	1448	1449	1448	1450	1451	1451	1450	1452	1451	1449	1449	1449	1450
1470	1473	1473	1473	1472	1472	1472	1465	1464	1465	1465	1478	1478	1480	1480	1479	1480	1479	1478	1479	1478	1478	1478	1479	1479	1478	1478	1476	1477	1476
1484	1478	1487	1480	1481	1482	1481	1481	1476	1477	1480	1484	1485	1479	1478	1476	1476	1475	1475	1476	1476	1476	1473	1474	1469	1469	1470	1471	1470	1468
1482	1472	1474	1471	1473	1474	1477	1477	1474	1474	1474	1473	1473	1472	1474	1473	1476	1474	1474	1474	1472	1473	1470	1470	1470	1471	1467	1469	1469	1467
1297	1300	1300	1299	1299	1298	1299	1299	1297	1296	1297	1297	1298	1297	1295	1294	1294	1292	1291	1291	1290	1290	1290	1289	1290	1287	1287	1288	1287	1287
1230	1237	1231	1232	1229	1229	1232	1232	1233	1230	1231	1234	1233	1234	1231	1230	1231	1231	1230	1230	1232	1234	1237	1237	1241	1244	1243	1244	1243	1241
1304	1311	1310	1311	1312	1312	1312	1311	1311	1310	1309	1309	1309	1309	1309	1308	1308	1307	1307	1307	1308	1308	1308	1304	1306	1306	1306	1306	1306	1306
1261	1258	1260	1261	1263	1267	1267	1264	1268	1261	1262	1261	1262	1259	1257	1258	1261	1261	1263	1262	1263	1263	1266	1266	1269	1272	1271	1267	1267	1265
1488	1479	1480	1480	1482	1482	1482	1482	1483	1484	1484	1484	1482	1482	1479	1477	1477	1477	1478	1474	1477	1478	1474	1476	1471	1470	1471	1471	1472	1470
1463	1464	1469	1468	1467	1470	1472	1474	1474	1470	1471	1473	1475	1474	1474	1473	1472	1471	1471	1470	1471	1470	1469	1469	1469	1467	1467	1467	1466	1465
1428	1426	1425	1426	1427	1426	1427	1427	1427	1427	1426	1426	1426	1425	1425	1424	1424	1424	1421	1419	1426	1426	1425	1425	1415	1425	1426	1425	1425	1423
1427	1427	1427	1428	1430	1433	1434	1434	1433	1432	1432	1432	1430	1429	1429	1428	1428	1428	1436	1436	1434	1431	1431	1431	1432	1432	1432	1432	1432	1432
1522	1520	1519	1517	1514	1514	1513	1514	1515	1517	1516	1519	1517	1516	1516	1515	1515	1515	1512	1512	1517	1510	1512	1515	1510	1503	1503	1501	1500	1498
1458	1462	1460	1459	1459	1457	1456	1455	1454	1455	1455	1456	1455	1456	1454	1449	1448	1445	1445	1443	1443	1443	1445	1441	1441	1442	1440	1440	1439	1439
1498	1494	1495	1495	1495	1494	1494	1494	1494	1495	1497	1497	1497	1497	1496	1496	1496	1496	1496	1495	1495	1495	1496	1494	1491	1492	1492	1492	1491	1490
1385	1391	1394	1395	1395	1395	1394	1394	1394	1393	1394	1393	1393	1393	1393	1393	1391	1388	1387	1385	1386	1385	1402	1383	1370	1374	1374	1375	1374	1374
1193	1191	1191	1193	1196	1196	1196	1195	1196	1195	1195	1196	1196	1194	1190	1188	1190	1190	1189	1187	1189	1191	1191	1185	1197	1197	1196	1195	1195	1193
1157	1154	1150	1132	1145	1144	1142	1145	1142	1148	1145	1148	1145	1144	1144	1143	1142	1141	1145	1138	1144	1148	1147	1147	1145	1151	1150	1151	1151	1151
1213	1217	1217	1214	1216	1215	1215	1215	1215	1214	1214	1214	1214	1215	1214	1213	1213	1212	1213	1212	1213	1214	1217	1221	1217	1219	1220	1221	1221	1219
1465	1468	1469	1467	1464	1465	1464	1465	1465	1466	1466	1470	1471	1469	1470	1467	1467	1463	1461	1459	1457	1458	1458	1445	1447	1441	1439	1441	1441	1440
1478	1482	1480	1478	1474	1474	1477	1478	1475	1477	1480	1481	1483	1484	1483	1482	1480	1478	1472	1472	1469	1469	1471	1466	1454	1453	1454	1457	1458	1457
1452	1444	1436	1434	1434	1435	1436	1434	1436	1441	1443	1444	1444	1449	1449	1442	1442	1440	1444	1443	1443	1442	1436	1430	1417	1416	1414	1413	1418	1416
1406	1406	1406	1406	1404	1403	1403	1402	1402	1403	1404	1406	1408	1407	1408	1404	1406	1405	1402	1400	1400	1397	1390	1386	1380	1378	1378	1377	1377	1378
1360	1364	1364	1363	1363	1363	1362	1364	1365	1362	1364	1365	1369	1362	1362	1367	1359	1358	1360	1359	1367	1363	1361	1348	1348	1347	1346	1343	1345	1344
1396	1396	1399	1395	1398	1398	1397	1399	1402	1403	1405	1406	1404	1404	1402	1394	1391	1387	1387	1384	1384	1384	1382	1368	1362	1351	1350	1349	1348	1346
1280	1283	1282	1284	1285	1284	1285	1285	1284	1284	1284	1286	1286	1286	1286	1286	1288	1290	1291	1289	1286	1291	1290	1289	1284	1284	1285	1284	1286	1281
1508	1506	1504	1501	1497	1497	1486	1490	1489	1499	1511	1513	1512	1514	1516	1513	1507	1509	1509	1507	1508	1508	1507	1496	1480	1472	1471	1468	1467	1470
1540	1526	1532	1522	1524	1519	1527	1520	1514	1520	1521	1531	1528	1529	1525	1522	1523	1525	1534	1534	1533	1537	1535	1529	1511	1503	1499	1493	1489	1490
1134	1131	1129	1130	1131	1131	1130	1130	1129	1130	1132	1133	1129	1130	1136	1134	1132	1128	1123	1131	1130	1130	1120	1133	1136	1140	1143	1142	1137	1136
1162	1159	1159	1160	1163	1164	1163	1161	1161	1163	1164	1167	1165	1164	1163	1162	1161	1162	1163	1161	1163	1164	1169	1178	1175	1178	1178	1177	1176	1175
1244	1239	1239	1241	1244	1242	1241	1240	1241	1241	1242	1242	1242	1243	1242	1242	1241	1241	1241	1240	1241	1241	1241	1244	1247	1247	1246	1244	1244	1241
1241	1235	1235	1236	1237	1237	1236	1236	1237	1237	1237	1238	1238	1239	1239	1237	1239	1239	1240	1240	1245	1244	1245	1244	1246	1245	1246	1247	1246	1244
1314	1319	1316	1318	1318	1319	1319	1318	1318	1318	1318	1319	1323	1325	1325	1325	1325	1325	1325	1325	1322	1322	1318	1316	1313	1309	1308	1304	1303	1303
1327	1330	1330	1330	1330	1329	1326	1327	1328	1330	1328	1328	1328	1328	1325	1319	1325	1323	1323	1323	1318	1318	1311	1306	1305	1305	1304	1301	1301	1301
1292	1286	1284	1284	1284	1284	1284	1284	1283	1284	1287	1287	1287	1287	1291	1288	1286	1285	1288	1285	1285	1289	1285	1280	1280	1280	1279	1278	1278	1278
1218	1221	1221	1212	1214	1214	1215	1218	1220	1221	1222	1224	1227	1230	1224	1226	1223	1222	1224	1225	1228	1227	1227	1224	1224	1221	1221	1218	1222	1222
1225	1224	1225	1228	1229	1228	1227	1226	1229	1231	1233	1235	1235	1237	1236	1236	1237	1235	1235	1234	1237	1231	1234	1231	1232	1230	1229	1227	1226	1226
1222	1220	1218	1220	1221	1221	1222	1223	1223	1224	1225	1226	1231	1232	1233	1227	1226	1228	1228	1229	1229	1227	1222	1223	1224	1224	1222	1222	1222	1221
1191	1189	1188	1188	1190	1187	1185	1189	1188	1189	1194	1192	1196	1192	1192	1194	1192	1193	1191	1189	1193	1194	1200	1193	1193	1193	1193	1193	1192	1191
1251	1252	1251	1251	1249	1252	1252	1254	1255	1257	1259	1261	1262	1264	1263	1260	1260	1253	1255	1255	1258	1256	1256	1249	1253	1247	1248	1249	1247	1246
1289	1288	1285	1286	1287	1286	1289	1289	1291	1293	1287	1298	1300	1299	1294	1299	1294	1292	1294	1291	1295	1294	1293	1289	1289	1279	1279	1278	1277	1278
1371	1365	1364	1364	1363	1363	1362	1362	1361	1363	1362	1365	1360	1366	1364	1364	1365	1364	1361	1360	1358	1354	1349	1331	1337	1337	1342	1341	1341	1341
1367	1360	1366	1357	1353	1347	1346	1342	1344	1345	1347	1348	1354	1358	1355	1350	1350	1349	1350	1350	1350	1346	1342	1337	1332	1329	1328	1328	1328	1329
1361	1356	1355	1354	1352	1351	1350	1351	1350	1351	1351	1357	1355	1355	1355	1352	1352	1360	1362	1359	1358	1356	1352	1341	1345	1341	1340	1341	1340	1339
1479	1488	1484	1481	1479	1478	1482	1484	1489	1489	1490	1492	1491	1492	1488	1485	1485	1485	1492	1490	1493	1498	1492	1488	1476	1462	1458	1455	1452	1452
1424	1419	1417	1415	1415	1414	1413	1414	1414	1416	1417	1418	1418	1421	1419	1419	1420	1420	1419	1419	1420	1419	1421	1410	1396	1392	1391	1390	1388	1387
1345	1337	1339	1339	1339	1340	1340	1339	1340	1340	1343	1347	1347	1349	1348	1349	1351	1352	1353	1353	1354	1353	1353	1351	1348	1348	1348	1348	1348	1348
1450	1444	1447	1442	1441	1437	1438	1439	1443	1448	1455	1457	1459	1460	1461	1464	1464	1465	1465	1460	1460	1462	1466	1461	1453	1448	1443	1442	1437	1433
1396	1396	1396	1396	1395	1392	1392	1392	1390	1391	1391	1394	1395	1399	1398	1398	1400	1402	1401	1400	1400	1401	1401	1398	1392	1392	1389	1388	1387	1389
1301	1300	1297	1299	1298	1299	1303	1303	1305	1304	1303	1304	1305	1308	1302	1301	1300	1299	1301	1302	1306	1305	1304	1303	1297	1299	1299	1298	1299	1300
1270	1274	1271	1271	1279	1279	1280	1279	1280	1279	1283	1279	1283	1286	1281	1279	1277	1282	1274	1273	1275	1286	1294	1275	1272	1272	1270	1268	1269	1272
1234	1235	1235	1236	1239	1242	1241	1240	1242	1243	1242	1245	1246	1243	1241	1240	1242	1241	1241	1236	1233	1233	1233	1238	1234	1236	1237	1238	1239	1239
1282	1280	1280	1283	1287	1287	1290	1293	1295	1297	1298	1296	1297	1297	1297	1301	1301	1302	1303	1302	1305	1303	1302	1299	1300	1298	1299	1298	1296	1296
1292	1291	1289	1292	1297	1299	1301	1300	1301	1300	1299	1296	1294	1296	1293	1290	1289	1288	1288	1288	1285	1281	1280	1279	1273	1281	1283	1284	1285	1285
1192	1192	1196	1201	1203	1188	1193	1196	1200	1203	1203	1202	1200	1198	1193	1193	1192	1193	1186	1191	1185	1183	1184	1184	1181	1184	1186	1186	1186	1185
1280	1283	0	0	0	0	0	0	0	0	0	0	0	0	0	0	0	0	1284	1282	1282	1280	1274	1280	1279	1278	1278	1283	1285	1286
1360	1352	1354	1359	1362	1364	1370	1376	1379	0	0	0	0	0	0	1364	1360	1360	1359	1364	0	0	0	0	1368	1363	1364	1363	1361	1358
1352	1345	1347	1347	1350	1347	1351	1356	1356	1355	1351	1352	1350	1344	1344	1344	1344	1345	1347	1352	1349	1346	1350	1346	1346	1348	1352	1355	1354	1354
1522	1523	1517	1522	1518	1517	1516	1514	1513	1514	1517	1528	1531	1529	1528	1526	1525	1525	1525	1525	1531	1546	1551	1542	1544	1532	1523	1516	1510	1506
1400	1391	1390	1388	1388	1386	1386	1387	1387	1387	1386	1386	1385	1388	1388	1390	1393	1393	1397	1397	1393	1395	1389	1385	1388	1382	1382	1381	1380	1380
1347	1343	1344	1345	1348	1349	1351	1350	1349	1348	1347	1347	1346	1346	1346	1344	1344	1341	1342	1349	1346	1348	1345	1342	1341	1344	1343	1343	1344	1343
1369	1362	1360	1364	1364	1366	1363	1362	1359	1357	1355	1356	1354	1354	1353	1351	1356	1358	1360	1364	1363	1360	1359	1356	1360	1356	1355	1356	1356	1356
1403	1404	1404	1403	1403	1391	1393	1392	1392	1392	1390	1391	1391	1390	1387	1384	1384	1385	1388	1389	1386	1386	1383	1381	1386	1384	1383	1382	1381	1382
1450	1440	1440	1447	1452	1450	1453	1453	1452	1456	1450	1461	1461	1455	1452	1450	1452	1445	1450	1458	1458	1458	1458	1458	1457	1453	1443	1440	1438	1436
1518	1526	1525	1522	1526	1520	1515	1515	1515	1522	1522	1527	1526	1534	1541	1545	1553	1554	1557	1557	1560	1557	1553	1545	1534	1537	1532	1528	1529	1530
1465	1466	1469	1472	1475	1471	1467	1465	1465	1465	1467	1467	1468	1469	1469	1471	1475	1477	1480	1482	1484	1488	1485	1483	1479	1476	1471	1468	1467	1466
1279	1280	1287	1282	1284	1285	1292	1297	1286	1285	1288	1282	1280	1275	1268	1270	1271	1269	1269	1269	1269	1281	1246	1246	1248	1251	1250	1256	1258	1258
1016	1016	1016	1016	1016	1016	1016	1017	1017	1017	1017	1013	1013	1011	1005	1003	1001	1001	1004	1004	1002	1002	1000	999	998	1000	1004	1011	1008	1008
1162	1162	1161	1160	1161	1162	1162	1164	1164	1165	1165	1164	1163	1157	1157	1159	1157	1156	1155	1155	1158	1155	1155	1155	1155	1157	1160	1164	1164	1160
1448	1448	1448	1448	1449	1452	1449	1450	1450	1450	1451	1452	1457	1460	1460	1461	1461	1461	1460	1460	1462	1463	1463	1465	1463	1450	1447	1445	1441	1438
1486	1484	1484	1486	1488	1489	1488	1488	1486	1486	1486	1486	1489	1491	1492	1492	1491	1491	1491	1491	1495	1496	1500	1500	1498	1490	1489	1485	1477	1471
1573	1570	1566	1566	1566	1566	1557	1558	1556	1554	1555	1555	1564	1572	1576	1578	1575	1575	1579	1579	1583	1580	1577	1570	1565	1556	1529	1527	1519	1519
1573	1570	1566	1566	1566	1566	1557	1558	1556	1554	1555	1555	1564	1572	1576	1578	1575	1575	1579	1579	1583	1580	1577	1570	1565	1556	1584	1580	1577	1575
1565	1563	1546	1549	1551	1549	1550	1543	1553	1544	1552	1555	1559	1565	1572	1573	1573	1586	1578	1580	1582	1578	1575	1573	1571	1557	1556	1555	1555	1555
1567	1562	1559	1559	1571	1566	1567	1565	1569	1570	1567	1576	1579	1585	1586	1577	1575	1578	1580	1577	1590	1578	1584	1593	1570	1561	1558	1559	1553	1557
1599	1591	1599	1591	1591	1591	1584	1590	1590	1595	1592	1599	1598	1603	1604	1603	1597	1594	1599	1611	1607	1607	1611	1600	1594	1582	1578	1570	1568	1571
1562	1556	1554	1546	1552	1553	1552	1548	1549	1551	1555	1556	1557	1559	0	0	0	1582	1586	1585	1585	1585	1582	0	0	1570	1570	0	0	0
0	1523	1523	1523	1523	1524	1524	1524	1519	1519	1521	1521	1521	1521	1521	1521	1521	1521	1521	1520	1520	1520	1520	1522	1522	1513	1511	1511	1511	1512
1503	1503	1503	1503	1503	1503	1503	1503	1503	1503	1503	1503	1504	1504	1506	1506	1506	1506	1508	1508	1508	1508	1508	1508	1508	1508	1508	1507	1511	1509
64	60	59	53	53	55	50	49	40	33	33	35	39	39	39	45	41	42	47	47	47	47	48	52	57	53	48	48	48	48
102	102	98	98	93	92	91	84	79	79	79	79	89	90	94	94	100	97	99	91	95	96	96	93	91	91	91	91	91	84
7	6	6	6	4	2	5	5	4	7	10	15	16	16	18	17	17	20	19	19	19	21	23	23	23	23	19	19	19	17
0	0	0	0	0	0	0	0	0	6	6	8	8	7	7	5	2	2	2	5	11	9	8	7	6	6	5	5	4	5
81	81	81	81	81	81	78	78	78	81	88	88	88	80	83	80	76	76	71	76	80	71	77	74	74	73	70	70	70	65
123	123	124	124	124	0	0	140	140	140	144	141	135	135	127	127	126	126	126	126	126	126	128	127	127	127	127	0	0	0
0	0	0	0	0	0	0	209	210	213	210	206	201	201	201	202	201	0	0	0	0	210	0	0	0	0	0	0	0	0
0	0	0	0	0	0	0	0	0	0	0	0	0	0	0	261	274	274	277	277	270	273	269	270	267	276	280	274	275	282
735	735	730	726	725	728	726	723	723	720	717	711	706	705	704	696	696	696	700	699	695	694	692	692	686	687	691	692	691	691
1474	1474	1475	1474	1473	1468	1465	1462	1463	1463	1464	1467	1470	1474	1478	1480	1486	1487	1492	1495	1498	1498	1510	1499	1498	1493	1488	1484	1479	1477
1434	1433	1431	1433	1429	1432	1433	1433	1435	1436	1436	1439	1441	1442	1442	1444	1444	1449	1450	1451	1452	1439	1446	1459	1452	1444	1442	1439	1438	1437
496	499	490	493	493	493	493	493	484	480	476	482	479	483	483	483	484	485	485	486	490	0	0	0	0	0	0	0	0	0
1300	1296	1296	1296	1295	1295	1292	1292	1294	1296	1297	1299	1300	1305	1307	1306	1305	1305	1307	1307	1304	1302	1301	1289	1285	1288	1287	1287	1285	1283
1273	1270	1268	1268	1268	1268	1267	1267	1267	1267	1267	1268	1271	1272	1277	1273	1271	1271	1270	1274	1273	1274	1271	1265	0	0	0	0	0	0
1492	1492	1493	1491	1490	1489	1484	1484	1485	1485	1484	1483	1483	1483	1483	1482	1479	1480	1480	1479	1479	1475	1477	1477	1477	1484	1479	1480	1480	1480
1462	1461	1461	1461	1461	1461	1461	1460	1461	1460	1459	1459	1458	1459	1459	1458	1458	1457	1456	1455	1455	1455	1454	1454	1454	1454	1456	1456	1455	1455
1498	1497	1497	1497	1496	1496	1495	1494	1496	1495	1494	1494	1495	1495	1494	1493	1492	1491	1490	1491	1492	1492	1490	1489	1489	1488	1486	1488	1488	1489
1533	1531	1532	1532	1533	1531	1531	1531	1531	1531	1531	1529	1530	1531	1531	1530	1531	1530	1529	1528	1529	1529	1528	1529	1528	1526	1526	1525	1524	1525
1522	1523	1522	1522	1522	1522	1521	1519	1520	1519	1518	1518	1518	1519	1520	1519	1519	1518	1518	1517	1519	1520	1518	1515	1513	1512	1512	1513	1510	1506
1466	1465	1466	1465	1466	1465	1463	1463	1463	1462	1460	1460	1459	1459	1458	1457	1458	1458	1457	1456	1455	1454	1452	1450	1449	1449	1448	1449	1448	1448
1592	1590	1587	1581	1584	1582	1581	1581	1581	1586	1590	1590	1591	1591	1591	1590	1589	1588	1587	1585	1584	1584	1584	1583	1581	1580	1578	1577	1576	1576
1624	1623	1620	1614	1611	1613	1616	1614	1617	1619	1622	1624	1623	1625	1624	1622	1621	1622	1622	1622	1623	1623	1621	1618	1615	1614	1612	1609	1608	1607
1740	1742	1749	1752	1747	1735	1733	1740	1744	1749	1744	1745	1753	1755	1752	1754	1746	1744	1748	1749	1750	1746	1742	1740	1738	1739	1741	1738	1735	1732
1718	1717	1727	1721	1716	1705	1712	1716	1717	1718	1719	1724	1724	1723	1722	1726	1721	1713	1717	1718	1722	1721	1720	1720	1717	1710	1703	1704	1707	1705
1659	1658	1659	1655	1655	1647	1646	1638	1643	1639	1645	1648	1648	1648	1650	1650	1641	1638	1637	1639	1646	1643	1644	1643	1638	1634	1630	1631	1632	1631

## Sheet: DeathMatrix
0	0	0	0	0	0	0	0	0	0	0	0	0	0	0	0	0	0	0	0	0	0	0	0	0	0	0	0	0	0
0	0	0	0	0	0	0	0	0	0	0	0	0	0	0	0	0	0	0	0	0	0	0	0	0	0	0	0	0	0
0	0	0	0	0	1	0	0	0	0	0	0	0	0	0	0	0	0	0	0	0	0	0	0	0	0	0	0	0	0
0	0	0	0	0	0	0	0	0	0	0	0	0	0	0	0	0	0	0	0	0	0	0	0	0	0	0	0	0	0
0	0	0	0	0	0	0	0	0	0	0	0	0	0	0	0	0	0	0	0	0	0	0	0	0	0	0	0	0	0
0	0	0	0	0	0	0	0	0	0	0	0	0	0	0	0	0	0	0	0	0	0	0	0	0	0	0	0	0	0
0	0	0	0	0	0	0	0	0	0	0	0	0	0	0	0	0	0	0	0	0	0	0	0	0	0	0	0	0	0
0	0	0	0	0	0	0	0	0	0	0	0	0	0	0	0	0	0	0	0	0	0	0	0	0	0	0	0	0	0
0	0	0	0	0	0	0	0	0	0	0	0	0	0	0	0	0	0	0	0	0	0	0	0	0	0	0	0	0	0
0	0	0	0	0	0	0	0	0	0	0	0	0	0	0	0	0	0	0	0	0	0	0	0	0	0	0	0	0	0
0	0	0	0	0	0	0	0	0	0	0	0	0	0	0	0	0	0	0	0	0	0	0	0	0	0	0	0	0	0
0	0	0	0	0	0	0	0	0	0	0	0	0	0	0	0	0	0	0	0	0	0	0	0	0	0	0	0	0	0
0	0	0	0	0	0	0	0	0	0	0	0	0	0	0	0	0	0	0	0	0	0	0	0	0	0	0	0	0	0
0	0	0	0	0	0	0	0	0	0	0	0	0	0	0	0	0	0	0	0	0	0	0	0	0	0	0	0	0	0
0	0	0	0	0	0	0	0	0	0	0	0	0	0	0	0	0	0	0	0	0	0	0	0	0	0	0	0	0	0
0	0	0	0	0	0	0	0	0	0	0	0	0	0	0	0	0	0	0	0	0	0	0	0	0	0	0	0	0	0
0	0	0	0	0	0	0	0	0	0	0	0	0	0	0	0	0	0	0	0	0	0	0	0	0	0	0	0	0	0
0	0	0	0	0	0	0	0	0	0	0	0	0	0	0	0	0	0	0	0	0	0	0	0	0	0	0	0	0	0
0	0	0	0	0	0	0	0	0	0	0	0	0	0	0	0	0	0	0	0	0	0	0	0	0	0	0	0	0	0
0	0	0	0	0	0	0	0	0	0	0	0	0	0	0	0	0	0	0	0	0	0	0	0	0	0	0	0	0	0
0	0	0	0	0	0	0	0	0	0	0	0	0	0	0	0	0	0	0	0	0	0	0	0	0	0	0	0	0	0
0	0	0	0	0	0	0	0	0	0	0	0	0	0	0	0	0	0	0	0	0	0	0	0	0	0	0	0	0	0
0	0	0	0	0	0	0	0	0	0	0	0	0	0	0	0	0	0	0	0	0	0	0	0	0	0	0	0	0	0
0	0	0	0	0	0	0	0	0	0	0	0	0	0	0	0	0	0	0	0	0	0	0	0	0	0	0	0	0	0
0	0	0	0	0	0	0	0	0	0	0	0	0	0	0	0	0	0	0	0	0	0	0	0	0	0	0	0	0	0
0	0	0	0	0	0	0	0	0	0	0	0	0	0	0	0	0	0	0	0	0	0	0	0	0	0	0	0	0	0
0	0	0	0	0	0	0	0	0	0	0	0	0	0	0	0	0	0	0	0	0	0	0	0	0	0	0	0	0	0
0	0	0	0	0	0	0	0	0	0	0	0	0	0	0	0	0	0	0	0	0	0	0	0	0	0	0	0	0	0
0	0	0	0	0	0	0	0	0	0	0	0	0	0	0	0	0	0	0	0	0	0	0	0	0	0	0	0	0	0
0	0	0	0	0	0	0	0	0	0	0	0	0	0	0	0	0	0	0	0	0	0	0	0	0	0	0	0	0	0
0	0	0	0	0	0	0	0	0	0	0	0	0	0	0	0	0	0	0	0	0	0	0	0	0	0	0	0	0	0
0	0	0	0	0	0	0	0	0	0	0	0	0	0	0	0	0	0	0	0	0	0	0	0	0	0	0	0	0	0
0	0	0	0	0	0	0	0	0	0	0	0	0	0	0	0	0	0	0	0	0	0	0	0	0	0	0	0	0	0
0	0	0	0	0	0	0	0	0	0	0	0	0	0	0	0	0	0	0	0	0	0	0	0	0	0	0	0	0	0
0	0	0	0	0	0	0	0	0	0	0	0	0	0	0	0	0	0	0	0	0	0	0	0	0	0	0	0	0	0
0	0	0	0	0	0	0	0	0	0	0	0	0	0	0	0	0	0	0	0	0	0	0	0	0	0	0	0	0	0
0	0	0	0	0	0	0	0	0	0	0	0	0	0	0	0	0	0	0	0	0	0	0	0	0	0	0	0	0	0
0	0	0	0	0	0	0	0	0	0	0	0	0	0	0	0	0	0	0	0	0	0	0	0	0	0	0	0	0	0
0	0	0	0	0	0	0	0	0	0	0	0	0	0	0	0	0	0	0	0	0	0	0	0	0	0	0	0	0	0
0	0	0	0	0	0	0	0	0	0	0	0	0	0	0	0	0	0	0	0	0	0	0	0	0	0	0	0	0	0
0	0	0	0	0	0	0	0	0	0	0	0	0	0	0	0	0	0	0	0	0	0	0	0	0	0	0	0	0	0
0	0	0	0	0	0	0	0	0	0	0	0	0	0	0	0	0	0	0	0	0	0	0	0	0	0	0	0	0	0
0	0	0	0	0	0	0	0	0	0	0	0	0	0	0	0	0	0	0	0	0	0	0	0	0	0	0	0	0	0
0	0	0	0	0	0	0	0	0	0	0	0	0	0	0	0	0	0	0	0	0	0	0	0	0	0	0	0	0	0
0	0	0	0	0	0	0	0	0	0	0	0	0	0	0	0	0	0	0	0	0	0	0	0	0	0	0	0	0	0
0	0	0	0	0	0	0	0	0	0	0	0	0	0	0	0	0	0	0	0	0	0	0	0	0	0	0	0	0	0
0	0	0	0	0	0	0	0	0	0	0	0	0	0	0	0	0	0	0	0	0	0	0	0	0	0	0	0	0	0
0	0	0	0	0	0	0	0	0	0	0	0	0	0	0	0	0	0	0	0	0	0	0	0	0	0	0	0	0	0
0	0	0	0	0	0	0	0	0	0	0	0	0	0	0	0	0	0	0	0	0	0	0	0	0	0	0	0	0	0
0	0	0	0	0	0	0	0	0	0	0	0	0	0	0	0	0	0	0	0	0	0	0	0	0	0	0	0	0	0
0	0	0	0	0	0	0	0	0	0	0	0	0	0	0	0	0	0	0	0	0	0	0	0	0	0	0	0	0	0
0	0	0	0	0	0	0	0	0	0	0	0	0	0	0	0	0	0	0	0	0	0	0	0	0	0	0	0	0	0
0	0	0	0	0	0	0	0	0	0	0	0	0	0	0	0	0	0	0	0	0	0	0	0	0	0	0	0	0	0
0	0	0	0	0	0	0	0	0	0	0	0	0	0	0	0	0	0	0	0	0	0	0	0	0	0	0	0	0	0
0	0	0	0	0	0	0	0	0	0	0	0	0	0	0	0	0	0	0	0	0	0	0	0	0	0	0	0	0	0
0	0	0	0	0	0	0	0	0	0	0	0	0	0	0	0	0	0	0	0	0	0	0	0	0	0	0	0	0	0
0	0	0	0	0	0	0	0	0	0	0	0	0	0	0	0	0	0	0	0	0	0	0	0	0	0	0	0	0	0
0	0	0	0	0	0	0	0	0	0	0	0	0	0	0	0	0	0	0	0	0	0	0	0	0	0	0	0	0	0
0	0	0	0	0	0	0	0	0	0	0	0	0	0	0	0	0	0	0	0	0	0	0	0	0	0	0	0	0	0
0	0	0	0	0	0	0	0	0	0	0	0	0	0	0	0	0	0	0	0	0	0	0	0	0	0	0	0	0	0
0	0	0	0	0	0	0	0	0	0	0	0	0	0	0	0	0	0	0	0	0	0	0	0	0	0	0	0	0	0
0	0	0	0	0	0	0	0	0	0	0	0	0	0	0	0	0	0	0	0	0	0	0	0	0	0	0	0	0	0
0	0	0	0	0	0	0	0	0	0	0	0	0	0	0	0	0	0	0	0	0	0	0	0	0	0	0	0	0	0
0	0	0	0	0	0	0	0	0	0	0	0	0	0	0	0	0	0	0	0	0	0	0	0	0	0	0	0	0	0
0	0	0	0	0	0	0	0	0	0	0	0	0	0	0	0	0	0	0	0	0	0	0	0	0	0	0	0	0	0
0	0	0	0	0	0	0	0	0	0	0	0	0	0	0	0	0	0	0	0	0	0	0	0	0	0	0	0	0	0
0	0	0	0	0	0	0	0	0	0	0	0	0	0	0	0	0	0	0	0	0	0	0	0	0	0	0	0	0	0
0	0	0	0	0	0	0	0	0	0	0	0	0	0	0	0	0	0	0	0	0	0	0	0	0	0	0	0	0	0
0	0	0	0	0	0	0	0	0	0	0	0	0	0	0	0	0	0	0	0	0	0	0	0	0	0	0	0	0	0
0	0	0	0	0	0	0	0	0	0	0	0	0	0	0	0	0	0	0	0	0	0	0	0	0	0	0	0	0	0
0	0	0	0	0	0	0	0	0	0	0	0	0	0	0	0	0	0	0	0	0	0	0	0	0	0	0	0	0	0
0	0	0	0	0	0	0	0	0	0	0	0	0	0	0	0	0	0	0	0	0	0	0	0	0	0	0	0	0	0
0	0	0	0	0	0	0	0	0	0	0	0	0	0	0	0	0	0	0	0	0	0	0	0	0	0	0	0	0	0
0	0	0	0	0	0	0	0	0	0	0	0	0	0	0	0	0	0	0	0	0	0	0	0	0	0	0	0	0	0
0	0	0	0	0	0	0	0	0	0	0	0	0	0	0	0	0	0	0	0	0	0	0	0	0	0	0	0	0	0
0	0	0	0	0	0	0	0	0	0	0	0	0	0	0	0	0	0	0	0	0	0	0	0	0	0	0	0	0	0
0	0	0	0	0	0	0	0	0	0	0	0	0	0	0	0	0	0	0	0	0	0	0	0	0	0	0	0	0	0
0	0	0	0	0	0	0	0	0	0	0	0	0	0	0	0	0	0	0	0	0	0	0	0	0	0	0	0	0	0
0	0	0	0	0	0	0	0	0	0	0	0	0	0	0	0	0	0	0	0	0	0	0	0	0	0	0	0	0	0
0	0	0	0	0	0	0	0	0	0	0	0	0	0	0	0	0	0	0	0	0	0	0	0	0	0	0	0	0	0
0	0	0	0	0	0	0	0	0	0	0	0	0	0	0	0	0	0	0	0	0	0	0	0	0	0	0	0	0	0
0	0	0	0	0	0	0	0	0	0	0	0	0	0	0	0	0	0	0	0	0	0	0	0	0	0	0	0	0	0
0	0	0	0	0	0	0	0	0	0	0	0	0	0	0	0	0	0	0	0	0	0	0	0	0	0	0	0	0	0
0	0	0	0	0	0	0	0	0	0	0	0	0	0	0	0	0	0	0	0	0	0	0	0	0	0	0	0	0	0
0	0	0	0	0	0	0	0	0	0	0	0	0	0	0	0	0	0	0	0	0	0	0	0	0	0	0	0	0	0
0	0	0	0	0	0	0	0	0	0	0	0	0	0	0	0	0	0	0	0	0	0	0	0	0	0	0	0	0	0
0	0	0	0	0	0	0	0	0	0	0	0	0	0	0	0	0	0	0	0	0	0	0	0	0	0	0	0	0	0
0	0	0	0	0	0	0	0	0	0	0	0	0	0	0	0	0	0	0	0	0	0	0	0	0	0	0	0	0	0
0	0	0	0	0	0	0	0	0	0	0	0	0	0	0	0	0	0	0	0	0	0	0	0	0	0	0	0	0	0
0	0	0	0	0	0	0	0	0	0	0	0	0	0	0	0	0	0	0	0	0	0	0	0	0	0	0	0	0	0
0	0	0	0	0	0	0	0	0	0	0	0	0	0	0	0	0	0	0	0	0	0	0	0	0	0	0	0	0	0
0	0	0	0	0	0	0	0	0	0	0	0	0	0	0	0	0	0	0	0	0	0	0	0	0	0	0	0	0	0
0	0	0	0	0	0	0	0	0	0	0	0	0	0	0	0	0	0	0	0	0	0	0	0	0	0	0	0	0	0
0	0	0	0	0	0	0	0	0	0	0	0	0	0	0	0	0	0	0	0	0	0	0	0	0	0	0	0	0	0
0	0	0	0	0	0	0	0	0	0	0	0	0	0	0	0	0	0	0	0	0	0	0	0	0	0	0	0	0	0
0	0	0	0	0	0	0	0	0	0	0	0	0	0	0	0	0	0	0	0	0	0	0	0	0	0	0	0	0	0
0	0	0	0	0	0	0	0	0	0	0	0	0	0	0	0	0	0	0	0	0	0	0	0	0	0	0	0	0	0
0	0	0	0	0	0	0	0	0	0	0	0	0	0	0	0	0	0	0	0	0	0	0	0	0	0	0	0	0	0
0	0	0	0	0	0	0	0	0	0	0	0	0	0	0	0	0	0	0	0	0	0	0	0	0	0	0	0	0	0
0	0	0	0	0	0	0	0	0	0	0	0	0	0	0	0	0	0	0	0	0	0	0	0	0	0	0	0	0	0
0	0	0	0	0	0	0	0	0	0	0	0	0	0	0	0	0	0	0	0	0	0	0	0	0	0	0	0	0	0
0	0	0	0	0	0	0	0	0	0	0	0	0	0	0	0	0	0	0	0	0	0	0	0	0	0	0	0	0	0
0	0	0	0	0	0	0	0	0	0	0	0	0	0	0	0	0	0	0	0	0	0	0	0	0	0	0	0	0	0
0	0	0	0	0	0	0	0	0	0	0	0	0	0	0	0	0	0	0	0	0	0	0	0	0	0	0	0	0	0
0	0	0	0	0	0	0	0	0	0	0	0	0	0	0	0	0	0	0	0	0	0	0	0	0	0	0	0	0	0
0	0	0	0	0	0	0	0	0	0	0	0	0	0	0	0	0	0	0	0	0	0	0	0	0	0	0	0	0	0
0	0	0	0	0	0	0	0	0	0	0	0	0	0	0	0	0	0	0	0	0	0	0	0	0	0	0	0	0	0
0	0	0	0	0	0	0	0	0	0	0	0	0	0	0	0	0	0	0	0	0	0	0	0	0	0	0	0	0	0
0	0	0	0	0	0	0	0	0	0	0	0	0	0	0	0	0	0	0	0	0	0	0	0	0	0	0	0	0	0
0	0	0	0	0	0	0	0	0	0	0	0	0	0	0	0	0	0	0	0	0	0	0	0	0	0	0	0	0	0
0	0	0	0	0	0	0	0	0	0	0	0	0	0	0	0	0	0	0	0	0	0	0	0	0	0	0	0	0	0
0	0	0	0	0	0	0	0	0	0	0	0	0	0	0	0	0	0	0	0	0	0	0	0	0	0	0	0	0	0
0	0	0	0	0	0	0	0	0	0	0	0	0	0	0	0	0	0	0	0	0	0	0	0	0	0	0	0	0	0
0	0	0	0	0	0	0	0	0	0	0	0	0	0	0	0	0	0	0	0	0	0	0	0	0	0	0	0	0	0
0	0	0	0	0	0	0	0	0	0	0	0	0	0	0	0	0	0	0	0	0	0	0	0	0	0	0	0	0	0
0	0	0	0	0	0	0	0	0	0	0	0	0	0	0	0	0	0	0	0	0	0	0	0	0	0	0	0	0	0
0	0	0	0	0	0	0	0	0	0	0	0	0	0	0	0	0	0	0	0	0	0	0	0	0	0	0	0	0	0
0	0	0	0	0	0	0	0	0	0	0	0	0	0	0	0	0	0	0	0	0	0	0	0	0	0	0	0	0	0
0	0	0	0	0	0	0	0	0	0	0	0	0	0	0	0	0	0	0	0	0	0	0	0	0	0	0	0	0	0
0	0	0	0	0	0	0	0	0	0	0	0	0	0	0	0	0	0	0	0	0	0	0	0	0	0	0	0	0	0
0	0	0	0	0	0	0	0	0	0	0	0	0	0	0	0	0	0	0	0	0	0	0	0	0	0	0	0	0	0
0	0	0	0	0	0	0	0	0	0	0	0	0	0	0	0	0	0	0	0	0	0	0	0	0	0	0	0	0	0
0	0	0	0	0	0	0	0	0	0	0	0	0	0	0	0	0	0	0	0	0	0	0	0	0	0	0	0	0	0
0	0	0	0	0	0	0	0	0	0	0	0	0	0	0	0	0	0	0	0	0	0	0	0	0	0	0	0	0	0
0	0	0	0	0	0	0	0	0	0	0	0	0	0	0	0	0	0	0	0	0	0	0	0	0	0	0	0	0	0
0	0	0	0	0	0	0	0	0	0	0	0	0	0	0	0	0	0	0	0	0	0	0	0	0	0	0	0	0	0
0	0	0	0	0	0	0	0	0	0	0	0	0	0	0	0	0	0	0	0	0	0	0	0	0	0	0	0	0	0
0	0	0	0	0	0	0	0	0	0	0	0	0	0	0	0	0	0	0	0	0	0	0	0	0	0	0	0	0	0
0	0	0	0	0	0	0	0	0	0	0	0	0	0	0	0	0	0	0	0	0	0	0	1	0	0	0	0	0	0
0	0	0	0	0	0	0	0	0	0	0	0	0	0	0	0	0	0	0	0	0	0	0	0	0	0	0	0	0	0
0	0	0	0	0	0	0	0	0	0	0	0	0	0	0	0	0	0	0	0	0	0	0	0	0	0	0	0	0	0
0	0	0	0	0	0	0	0	0	0	0	0	0	0	0	0	0	0	0	0	0	0	0	0	0	0	0	0	0	0
0	0	0	0	0	0	0	0	0	0	0	0	0	0	0	0	0	0	0	0	0	0	0	0	0	0	0	0	0	0
0	0	0	0	0	0	0	0	0	0	0	0	0	0	0	0	0	0	0	0	0	0	0	0	0	0	0	0	0	0
0	0	0	0	0	0	0	0	0	0	0	0	0	0	0	0	0	0	0	0	0	0	0	0	0	0	0	0	0	0
0	0	0	0	0	0	0	0	0	0	0	0	0	0	0	0	0	0	0	0	0	0	0	0	0	0	0	0	0	0
0	0	0	0	0	0	0	0	0	0	0	0	0	0	0	0	0	0	0	0	0	0	0	0	0	0	0	0	0	0
0	0	0	0	0	0	0	0	0	0	0	0	0	0	0	0	0	0	0	0	0	0	0	0	0	0	0	0	0	0
0	0	0	0	0	0	0	0	0	0	0	0	0	0	0	0	0	0	0	0	0	0	0	0	0	0	0	0	0	0
0	0	0	0	0	0	0	0	0	0	0	0	0	0	0	0	0	0	0	0	0	0	0	0	0	0	0	0	0	0
0	0	0	0	0	0	0	0	0	0	0	0	0	0	0	0	0	0	0	0	0	0	0	0	0	0	0	0	0	0
0	0	0	0	0	0	0	0	0	0	0	0	0	0	0	0	0	0	0	0	0	0	0	0	0	0	0	0	0	0
0	0	0	0	0	0	0	0	0	0	0	0	0	0	0	0	0	0	0	0	0	0	0	0	0	0	0	0	0	0
0	0	0	0	0	0	0	0	0	0	0	0	0	0	0	0	0	0	0	0	0	0	0	0	0	0	0	0	0	0
0	0	0	0	0	0	0	0	0	0	0	0	0	0	0	0	0	0	0	0	0	0	0	0	0	0	0	0	0	0
0	0	0	0	0	0	0	0	0	0	0	0	0	0	0	0	0	0	0	0	0	0	0	0	0	0	0	0	0	0
0	0	0	0	0	0	0	0	0	0	0	0	0	0	0	0	0	0	0	0	0	0	0	0	0	0	0	0	0	0
0	0	0	0	0	0	0	0	0	0	0	0	0	0	0	0	0	0	0	0	0	0	0	0	0	0	0	0	0	0
0	0	0	0	0	0	0	0	0	0	0	0	0	0	0	0	0	0	0	0	0	0	0	0	0	0	0	0	0	0
0	0	0	0	0	0	0	0	0	0	0	0	0	0	0	0	0	0	0	0	0	0	0	0	0	0	0	0	0	0
0	0	0	0	0	0	0	0	0	0	0	0	0	0	0	0	0	0	0	0	0	0	0	0	0	0	0	0	0	0
0	0	0	0	0	0	0	0	0	0	0	0	0	0	0	0	0	0	0	0	0	0	0	0	0	0	0	0	0	0
0	0	0	0	0	0	0	0	0	0	0	0	0	0	0	0	0	0	0	0	0	0	0	0	0	0	0	0	0	0
0	0	0	0	0	0	0	0	0	0	0	0	0	0	0	0	0	0	0	0	0	0	0	0	0	0	0	0	0	0
0	0	0	0	0	0	0	0	0	0	0	0	0	0	0	0	0	0	0	0	0	0	0	0	0	0	0	0	0	0
0	0	0	0	0	0	0	0	0	0	0	0	0	0	0	0	0	0	0	0	0	0	0	0	0	0	0	0	0	0
0	0	0	0	0	0	0	0	0	0	0	0	0	0	0	0	0	0	0	0	0	0	0	0	0	0	0	0	0	0
0	0	0	0	0	0	0	0	0	0	0	0	0	0	0	0	0	0	0	0	0	0	0	0	0	0	0	0	0	0
0	0	0	0	0	0	0	0	0	0	0	0	0	0	0	0	0	0	0	0	0	0	0	0	0	0	0	0	0	0
0	0	0	0	0	0	0	0	0	0	0	0	0	0	0	0	0	0	0	0	0	0	0	0	0	0	0	0	0	0
0	0	0	0	0	0	0	0	0	0	0	0	0	0	0	0	0	0	0	0	0	0	0	0	0	0	0	0	0	0
0	0	0	0	0	0	0	0	0	0	0	0	0	0	0	0	0	0	0	0	0	0	0	0	0	0	0	0	0	0
0	0	0	0	0	0	0	0	0	0	0	0	0	0	0	0	0	0	0	0	0	0	0	0	0	0	0	0	0	0
0	0	0	0	0	0	0	0	0	0	0	0	0	0	0	0	0	0	0	0	0	0	0	0	0	0	0	0	0	0
0	0	0	0	0	0	0	0	0	0	0	0	0	0	0	0	0	0	0	0	0	0	0	0	0	0	0	0	0	0
0	0	0	0	0	0	0	0	0	0	0	0	0	0	0	0	0	0	0	0	0	0	0	0	0	0	0	0	0	0
0	0	0	0	0	0	0	0	0	0	0	0	0	0	0	0	0	0	0	0	0	0	0	0	0	0	0	0	0	0
0	0	0	0	0	0	0	0	0	0	0	0	0	0	0	0	0	0	0	0	0	0	0	0	0	0	0	0	0	0
0	0	0	0	0	0	0	0	0	0	0	0	0	0	0	0	0	0	0	0	0	0	0	0	0	0	0	0	0	0
0	0	0	0	0	0	0	0	0	0	0	0	0	0	0	0	0	0	0	0	0	0	0	0	0	0	0	0	0	0
0	0	0	0	0	0	0	0	0	0	0	0	0	0	0	0	0	0	0	0	0	0	0	0	0	0	0	0	0	0
0	0	0	0	0	0	0	0	0	0	0	0	0	0	0	0	0	0	0	0	0	0	0	0	0	0	0	0	0	0
0	0	0	0	0	0	0	0	0	0	0	0	0	0	0	0	0	0	0	0	0	0	0	0	0	0	0	0	0	0
0	0	0	0	0	0	0	0	0	0	0	0	0	0	0	0	0	0	0	0	0	0	0	0	0	0	0	0	0	0
0	0	0	0	0	0	0	0	0	0	0	0	0	0	0	0	0	0	0	0	0	0	0	0	0	0	0	0	0	0
0	0	0	0	0	0	0	0	0	0	0	0	0	0	0	0	0	0	0	0	0	0	0	0	0	0	0	0	0	0
0	0	0	0	0	0	0	0	0	0	0	0	0	0	0	0	0	0	0	0	0	0	0	0	0	0	0	0	0	0
0	0	0	0	0	0	0	0	0	0	0	0	0	0	0	0	0	0	0	0	0	0	0	0	0	0	0	0	0	0
0	0	0	0	0	0	0	0	0	0	0	0	0	0	0	0	0	0	0	0	0	0	0	0	0	0	0	0	0	0
0	0	0	0	0	0	0	0	0	0	0	0	0	0	0	0	0	0	0	0	0	0	0	0	0	0	0	0	0	0
0	0	0	0	0	0	0	0	0	0	0	0	0	0	0	0	0	0	0	0	0	0	0	0	0	0	0	0	0	0
0	0	0	0	0	0	0	0	0	0	0	0	0	0	0	0	0	0	0	0	0	0	0	0	0	0	0	0	0	0
0	0	0	0	0	0	0	0	0	0	0	0	0	0	0	0	0	0	0	0	0	0	0	0	0	0	0	0	0	0
0	0	0	0	0	0	0	0	0	0	0	0	0	0	0	0	0	0	0	0	0	0	0	0	0	0	0	0	0	0
0	0	0	0	0	0	0	0	0	0	0	0	0	0	0	0	0	0	0	0	0	0	0	0	0	0	0	0	0	0
0	0	0	0	0	0	0	0	0	0	0	0	0	0	0	0	0	0	0	0	0	0	0	0	0	0	0	0	0	0
0	0	0	0	0	0	0	0	0	0	0	0	0	0	0	0	0	0	0	0	0	0	0	0	0	0	0	0	0	0
0	0	0	0	0	0	0	0	0	0	0	0	0	0	0	0	0	0	0	0	0	0	0	0	0	0	0	0	0	0
0	0	0	0	0	0	0	0	0	0	0	0	0	0	0	0	0	0	0	0	0	0	0	0	0	0	0	0	0	0
0	0	0	0	0	0	0	0	0	0	0	0	0	0	0	0	0	0	0	0	0	0	0	0	0	0	0	0	0	0
0	0	0	0	0	0	0	0	0	0	0	0	0	0	0	0	0	0	0	0	0	0	0	0	0	0	0	0	0	0
0	0	0	0	0	0	0	0	0	0	0	0	0	0	0	0	0	0	0	0	0	0	0	0	0	0	0	0	0	0
0	0	0	0	0	0	0	0	0	0	0	0	0	0	0	0	0	0	0	0	0	0	0	0	0	0	0	0	0	0
0	0	0	0	0	0	0	0	0	0	0	0	0	0	0	0	0	0	0	0	0	0	0	0	0	0	0	0	0	0
0	0	0	0	0	0	0	0	0	0	0	0	0	0	0	0	0	0	0	0	0	0	0	0	0	0	0	0	0	0
0	0	0	0	0	0	0	0	0	0	0	0	0	0	0	0	0	0	0	0	0	0	0	0	0	0	0	0	0	0
0	0	0	0	0	0	0	0	0	0	0	0	0	0	0	0	0	0	0	0	0	0	0	0	0	0	0	0	0	0
0	0	0	0	0	0	0	0	0	0	0	0	0	0	0	0	0	0	0	0	0	0	0	0	0	0	0	0	0	0
0	0	0	0	0	0	0	0	0	0	0	0	0	0	0	0	0	0	0	0	0	0	0	0	0	0	0	0	0	0
0	0	0	0	0	0	0	0	0	0	0	0	0	0	0	0	0	0	0	0	0	0	0	0	0	0	0	0	0	0
0	0	0	0	0	0	0	0	0	0	0	0	0	0	0	0	0	0	0	0	0	0	0	0	0	0	0	0	0	0
0	0	0	0	0	0	0	0	0	0	0	0	0	0	0	0	0	0	0	0	0	0	0	0	0	0	0	0	0	0
0	0	0	0	0	0	0	0	0	0	0	0	0	0	0	0	0	0	0	0	0	0	0	0	0	0	0	0	0	0
0	0	0	0	0	0	0	0	0	0	0	0	0	0	0	0	0	0	0	0	0	0	0	0	0	0	0	0	0	0
0	0	0	0	0	0	0	0	0	0	0	0	0	0	0	0	0	0	0	0	0	0	0	0	0	0	0	0	0	0
0	0	0	0	0	0	0	0	0	0	0	0	0	0	0	0	0	0	0	0	0	0	0	0	0	0	0	0	0	0
0	0	0	0	0	0	0	0	0	0	0	0	0	0	0	0	0	0	0	0	0	0	0	0	0	0	0	0	0	0
0	0	0	0	0	0	0	0	0	0	0	0	0	0	0	0	0	0	0	0	0	0	0	0	0	0	0	0	0	0
0	0	0	0	0	0	0	0	0	0	0	0	0	0	0	0	0	0	0	0	0	0	0	0	0	0	0	0	0	0
0	0	0	0	0	0	0	0	0	0	0	0	0	0	0	0	0	0	0	0	0	0	0	0	0	0	0	0	0	0
0	0	0	0	0	0	0	0	0	0	0	0	0	0	0	0	0	0	0	0	0	0	0	0	0	0	0	0	0	0
0	0	0	0	0	0	0	0	0	0	0	0	0	0	0	0	0	0	0	0	0	0	0	0	0	0	0	0	0	0
0	0	0	0	0	0	0	0	0	0	0	0	0	0	0	0	0	0	0	0	0	0	0	0	0	0	0	0	0	0
0	0	0	0	0	0	0	0	0	0	0	0	0	0	0	0	0	0	0	0	0	0	0	0	0	0	0	0	0	0
0	0	0	0	0	0	0	0	0	0	0	0	0	0	0	0	0	0	0	0	0	0	0	0	0	0	0	0	0	0
0	0	0	0	0	0	0	0	0	0	0	0	0	0	0	0	0	0	0	0	0	0	0	0	0	0	0	0	0	0
0	0	0	0	0	0	0	0	0	0	0	0	0	0	0	0	0	0	0	0	0	0	0	0	0	0	0	0	0	0
0	0	0	0	0	0	0	0	0	0	0	0	0	0	0	0	0	0	0	0	0	0	0	0	0	0	0	0	0	0
0	0	0	0	0	0	0	0	0	0	0	0	0	0	0	0	0	0	0	0	0	0	0	0	0	0	0	0	0	0
0	0	0	0	0	0	0	0	0	0	0	0	0	0	0	0	0	0	0	0	0	0	0	0	0	0	0	0	0	0
0	0	0	0	0	0	0	0	0	0	0	0	0	0	0	0	0	0	0	0	0	0	0	0	0	0	0	0	0	0
0	0	0	0	0	0	0	0	0	0	0	0	0	0	0	0	0	0	0	0	0	0	0	0	0	0	0	0	0	0
0	0	0	0	0	0	0	0	0	0	0	0	0	0	0	0	0	0	0	0	0	0	0	0	0	0	0	0	0	0
0	0	0	0	0	0	0	0	0	0	0	0	0	0	0	0	0	0	0	0	0	0	0	0	0	0	0	0	0	0
0	0	0	0	0	0	0	0	0	0	0	0	0	0	0	0	0	0	0	0	0	0	0	0	0	0	0	0	0	0
0	0	0	0	0	0	0	0	0	0	0	0	0	0	0	0	0	0	0	0	0	0	0	0	0	0	0	0	0	0
0	0	0	0	0	0	0	0	0	0	0	0	0	0	0	0	0	0	0	0	0	0	0	0	0	0	0	0	0	0
0	0	0	0	0	0	0	0	0	0	0	0	0	0	0	0	0	0	0	0	0	0	0	0	0	0	0	0	0	0
0	0	0	0	0	0	0	0	0	0	0	0	0	0	0	0	0	0	0	0	0	0	0	0	0	0	0	0	0	0
0	0	0	0	0	0	0	0	0	0	0	0	0	0	0	0	0	0	0	0	0	0	0	0	0	0	0	0	0	0
0	0	0	0	0	0	0	0	0	0	0	0	0	0	0	0	0	0	0	0	0	0	0	0	0	0	0	0	0	0
0	0	0	0	0	0	0	0	0	0	0	0	0	0	0	0	0	0	0	0	0	0	0	0	0	0	0	0	0	0
0	0	0	0	0	0	0	0	0	0	0	0	0	0	0	0	0	0	0	0	0	0	0	0	0	0	0	0	0	0
0	0	0	0	0	0	0	0	0	0	0	0	0	0	0	0	0	0	0	0	0	0	0	0	0	0	0	0	0	0
0	0	0	0	0	0	0	0	0	0	0	0	0	0	0	0	0	0	0	0	0	0	0	0	0	0	0	0	0	0
0	0	0	0	0	0	0	0	0	0	0	0	0	0	0	0	0	0	0	0	0	0	0	0	0	0	0	0	0	0
0	0	0	0	0	0	0	0	0	0	0	0	0	0	0	0	0	0	0	0	0	0	0	0	0	0	0	0	0	0
0	0	0	0	0	0	0	0	0	0	0	0	0	0	0	0	0	0	0	0	0	0	0	0	0	0	0	0	0	0
0	0	0	0	0	0	0	0	0	0	0	0	0	0	0	0	0	0	0	0	0	0	0	0	0	0	0	0	0	0
0	0	0	0	0	0	0	0	0	0	0	0	0	0	0	0	0	0	0	0	0	0	0	0	0	0	0	0	0	0
0	0	0	0	0	0	0	0	0	0	0	0	0	0	0	0	0	0	0	0	0	0	0	0	0	0	0	0	0	0
0	0	0	0	0	0	0	0	0	0	0	0	0	0	0	0	0	0	0	0	0	0	0	0	0	0	0	0	0	0
0	0	0	0	0	0	0	0	0	0	0	0	0	0	0	0	0	0	0	0	0	0	0	0	0	0	0	0	0	0
0	0	0	0	0	0	0	0	0	0	0	0	0	0	0	0	0	0	0	0	0	0	0	0	0	0	0	0	0	0
0	0	0	0	0	0	0	0	0	0	0	0	0	0	0	0	0	0	0	0	0	0	0	0	0	0	0	0	0	0
0	0	0	0	0	0	0	0	0	0	0	0	0	0	0	0	0	0	0	0	0	0	0	0	0	0	0	0	0	0
0	0	0	0	0	0	0	0	0	0	0	0	0	0	0	0	0	0	0	0	0	0	0	0	0	0	0	0	0	0
0	0	0	0	0	0	0	0	0	0	0	0	0	0	0	0	0	0	0	0	0	0	0	0	0	0	0	0	0	0
0	0	0	0	0	0	0	0	0	0	0	0	0	0	0	0	0	0	0	0	0	0	0	0	0	0	0	0	0	0
0	0	0	0	0	0	0	0	0	0	0	0	0	0	0	0	0	0	0	0	0	0	0	0	0	0	0	0	0	0
0	0	0	0	0	0	0	0	0	0	0	0	0	0	0	0	0	0	0	0	0	0	0	0	0	0	0	0	0	0
0	0	0	0	0	0	0	0	0	0	0	0	0	0	0	0	0	0	0	0	0	0	0	0	0	0	0	0	0	0
0	0	0	0	0	0	0	0	0	0	0	0	0	0	0	0	0	0	0	0	0	0	0	0	0	0	0	0	0	0
0	0	0	0	0	0	0	0	0	0	0	0	0	0	0	0	0	0	0	0	0	0	0	0	0	0	0	0	0	0
0	0	0	0	0	0	0	0	0	0	0	0	0	0	0	0	0	0	0	0	0	0	0	0	0	0	0	0	0	0
0	0	0	0	0	0	0	0	0	0	0	0	0	0	0	0	0	0	0	0	0	0	0	0	0	0	0	0	0	0
0	0	0	0	0	0	0	0	0	0	0	0	0	0	0	0	0	0	0	0	0	0	0	0	0	0	0	0	0	0
0	0	0	0	0	0	0	0	0	0	0	0	0	0	0	0	0	0	0	0	0	0	0	0	0	0	0	0	0	0
0	0	0	0	0	0	0	0	0	0	0	0	0	0	0	0	0	0	0	0	0	0	0	0	0	0	0	0	0	0
0	0	0	0	0	0	0	0	0	0	0	0	0	0	0	0	0	0	0	0	0	0	0	0	0	0	0	0	0	0
0	0	0	0	0	0	0	0	0	0	0	0	0	0	0	0	0	0	0	0	0	0	0	0	0	0	0	0	0	0
0	0	0	0	0	0	0	0	0	0	0	0	0	0	0	0	0	0	0	0	0	0	0	0	0	0	0	0	0	0
0	0	0	0	0	0	0	0	0	0	0	0	0	0	0	0	0	0	0	0	0	0	0	0	0	0	0	0	0	0
0	0	0	0	0	0	0	0	0	0	0	0	0	0	0	0	0	0	0	0	0	0	0	0	0	0	0	0	0	0
0	0	0	0	0	0	0	0	0	0	0	0	0	0	0	0	0	0	0	0	0	0	0	0	0	0	0	0	0	0
0	0	0	0	0	0	0	0	0	0	0	0	0	0	0	0	0	0	0	0	0	0	0	0	0	0	0	0	0	0
0	0	0	0	0	0	0	0	0	0	0	0	0	0	0	0	0	0	0	0	0	0	0	0	0	0	0	0	0	0
0	0	0	0	0	0	0	0	0	0	0	0	0	0	0	0	0	0	0	0	0	0	0	0	0	0	0	0	0	0
0	0	0	0	0	0	0	0	0	0	0	0	0	0	0	0	0	0	0	0	0	0	0	0	0	0	0	0	0	0
0	0	0	0	0	0	0	0	0	0	0	0	0	0	0	0	0	0	0	0	0	0	0	0	0	0	0	0	0	0
0	0	0	0	0	0	0	0	0	0	0	0	0	0	0	0	0	0	0	0	0	0	0	0	0	0	0	0	0	0
0	0	0	0	0	0	0	0	0	0	0	0	0	0	0	0	0	0	0	0	0	0	0	0	0	0	0	0	0	0
0	0	0	0	0	0	0	0	0	0	0	0	0	0	0	0	0	0	0	0	0	0	0	0	0	0	0	0	0	0
0	0	0	0	0	0	0	0	0	0	0	0	0	0	0	0	0	0	0	0	0	0	0	0	0	0	0	0	0	0
0	0	0	0	0	0	0	0	0	0	0	0	0	0	0	0	0	0	0	0	0	0	0	0	0	0	0	0	0	0
0	0	0	0	0	0	0	0	0	0	0	0	0	0	0	0	0	0	0	0	0	0	0	0	0	0	0	0	0	0
0	0	0	0	0	0	0	0	0	0	0	0	0	0	0	0	0	0	0	0	0	0	0	0	0	0	0	0	0	0
0	0	0	0	0	0	0	0	0	0	0	0	0	0	0	0	0	0	0	0	0	0	0	0	0	0	0	0	0	0
0	0	0	0	0	0	0	0	0	0	0	0	0	0	0	0	0	0	0	0	0	0	0	0	0	0	0	0	0	0
0	0	0	0	0	0	0	0	0	0	0	0	0	0	0	0	0	0	0	0	0	0	0	0	0	0	0	0	0	0
0	0	0	0	0	0	0	0	0	0	0	0	0	0	0	0	0	0	0	0	0	0	0	0	0	0	0	0	0	0
0	0	0	0	0	0	0	0	0	0	0	0	0	0	0	0	0	0	0	0	0	0	0	0	0	0	0	0	0	0
0	0	0	0	0	0	0	0	0	0	0	0	0	0	0	0	0	0	0	0	0	0	0	0	0	0	0	0	0	0
0	0	0	0	0	0	0	0	0	0	0	0	0	0	0	0	0	0	0	0	0	0	0	0	0	0	0	0	0	0
0	0	0	0	0	0	0	0	0	0	0	0	0	0	0	0	0	0	0	0	0	0	0	0	0	0	0	0	0	0
0	0	0	0	0	0	0	0	0	0	0	0	0	0	0	0	0	0	0	0	0	0	0	0	0	0	0	0	0	0
0	0	0	0	0	0	0	0	0	0	0	0	0	0	0	0	0	0	0	0	0	0	0	0	0	0	0	0	0	0
0	0	0	0	0	0	0	0	0	0	0	0	0	0	0	0	0	0	0	0	0	0	0	0	0	0	0	0	0	0
0	0	0	0	0	0	0	0	0	0	0	0	0	0	0	0	0	0	0	0	0	0	0	0	0	0	0	0	0	0
0	0	0	0	0	0	0	0	0	0	0	0	0	0	0	0	0	0	0	0	0	0	0	0	0	0	0	0	0	0
0	0	0	0	0	0	0	0	0	0	0	0	0	0	0	0	0	0	0	0	0	0	0	0	0	0	0	0	0	0
0	0	0	0	0	0	0	0	0	0	0	0	0	0	0	0	0	0	0	0	0	0	0	0	0	0	0	0	0	0
0	0	0	0	0	0	0	0	0	0	0	0	0	0	0	0	0	0	0	0	0	0	0	0	0	0	0	0	0	0
0	0	0	0	0	0	0	0	0	0	0	0	0	0	0	0	0	0	0	0	0	0	0	0	0	0	0	0	0	0
0	0	0	0	0	0	0	0	0	0	0	0	0	0	0	0	0	0	0	0	0	0	0	0	0	0	0	0	0	0
0	0	0	0	0	0	0	0	0	0	0	0	0	0	0	0	0	0	0	0	0	0	0	0	0	0	0	0	0	0
0	0	0	0	0	0	0	0	0	0	0	0	0	0	0	0	0	0	0	0	0	0	0	0	0	0	0	0	0	0
0	0	0	0	0	0	0	0	0	0	0	0	0	0	0	0	0	0	0	0	0	0	0	0	0	0	0	0	0	0
0	0	0	0	0	0	0	0	0	0	0	0	0	0	0	0	0	0	0	0	0	0	0	0	0	0	0	0	0	0
0	0	0	0	0	0	0	0	0	0	0	0	0	0	0	0	0	0	0	0	0	0	0	0	0	0	0	0	0	0
0	0	0	0	0	0	0	0	0	0	0	0	0	0	0	0	0	0	0	0	0	0	0	0	0	0	0	0	0	0
0	0	0	0	0	0	0	0	0	0	0	0	0	0	0	0	0	0	0	0	0	0	0	0	0	0	0	0	0	0
0	0	0	0	0	0	0	0	0	0	0	0	0	0	0	0	0	0	0	0	0	0	0	0	0	0	0	0	0	0
0	0	0	0	0	0	0	0	0	0	0	0	0	0	0	0	0	0	0	0	0	0	0	0	0	0	0	0	0	0
0	0	0	0	0	0	0	0	0	0	0	0	0	0	0	0	0	0	0	0	0	0	0	0	0	0	0	0	0	0
0	0	0	0	0	0	0	0	0	0	0	0	0	0	0	0	0	0	0	0	0	0	0	0	0	0	0	0	0	0
0	0	0	0	0	0	0	0	0	0	0	0	0	0	0	0	0	0	0	0	0	0	0	0	0	0	0	0	0	0
0	0	0	0	0	0	0	0	0	0	0	0	0	0	0	0	0	0	0	0	0	0	0	0	0	0	0	0	0	0
0	0	0	0	0	0	0	0	0	0	0	0	0	0	0	0	0	0	0	0	0	0	0	0	0	0	0	0	0	0
0	0	0	0	0	0	0	0	0	0	0	0	0	0	0	0	0	0	0	0	0	0	0	0	0	0	0	0	0	0
0	0	0	0	0	0	0	0	0	0	0	0	0	0	0	0	0	0	0	0	0	0	0	0	0	0	0	0	0	0
0	0	0	0	0	0	0	0	0	0	0	0	0	0	0	0	0	0	0	0	0	0	0	0	0	0	0	0	0	0
0	0	0	0	0	0	0	0	0	0	0	0	0	0	0	0	0	0	0	0	0	0	0	0	0	0	0	0	0	0
0	0	0	0	0	0	0	0	0	0	0	0	0	0	0	0	0	0	0	0	0	0	0	0	0	0	0	0	0	0
0	0	0	0	0	0	0	0	0	0	0	0	0	0	0	0	0	0	0	0	0	0	0	0	0	0	0	0	0	0
0	0	0	0	0	0	0	0	0	0	0	0	0	0	0	0	0	0	0	0	0	0	0	0	0	0	0	0	0	0
0	0	0	0	0	0	0	0	0	0	0	0	0	0	0	0	0	0	0	0	0	0	0	0	0	0	0	0	0	0
0	0	0	0	0	0	0	0	0	0	0	0	0	0	0	0	0	0	0	0	0	0	0	0	0	0	0	0	0	0
0	0	0	0	0	0	0	0	0	0	0	0	0	0	0	0	0	0	0	0	0	0	0	0	0	0	0	0	0	0
0	0	0	0	0	0	0	0	0	0	0	0	0	0	0	0	0	0	0	0	0	0	0	0	0	0	0	0	0	0
0	0	0	0	0	0	0	0	0	0	0	0	0	0	0	0	0	0	0	0	0	0	0	0	0	0	0	0	0	0
0	0	0	0	0	0	0	0	0	0	0	0	0	0	0	0	0	0	0	0	0	0	0	0	0	0	0	0	0	0
0	0	0	0	0	0	0	0	0	0	0	0	0	0	0	0	0	0	0	0	0	0	0	0	0	0	0	0	0	0
0	0	0	0	0	0	0	0	0	0	0	0	0	0	0	0	0	0	0	0	0	0	0	0	0	0	0	0	0	0
0	0	0	0	0	0	0	0	0	0	0	0	0	0	0	0	0	0	0	0	0	0	0	0	0	0	0	0	0	0
0	0	0	0	0	0	0	0	0	0	0	0	0	0	0	0	0	0	0	0	0	0	0	0	0	0	0	0	0	0
0	0	0	0	0	0	0	0	0	0	0	0	0	0	0	0	0	0	0	0	0	0	0	0	0	0	0	0	0	0
0	0	0	0	0	0	0	0	0	0	0	0	0	0	0	0	0	0	0	0	0	0	0	0	0	0	0	0	0	0
0	0	0	0	0	0	0	0	0	0	0	0	0	0	0	0	0	0	0	0	0	0	0	0	0	0	0	0	0	0
0	0	0	0	0	0	0	0	0	0	0	0	0	0	0	0	0	0	0	0	0	0	0	0	0	0	0	0	0	0
0	0	0	0	0	0	0	0	0	0	0	0	0	0	0	0	0	0	0	0	0	0	0	0	0	0	0	0	0	0
0	0	0	0	0	0	0	0	0	0	0	0	0	0	0	0	0	0	0	0	0	0	0	0	0	0	0	0	0	0
0	0	0	0	0	0	0	0	0	0	0	0	0	0	0	0	0	0	0	0	0	0	0	0	0	0	0	0	0	0
0	0	0	0	0	0	0	0	0	0	0	0	0	0	0	0	0	0	0	0	0	0	0	0	0	0	0	0	0	0
0	0	0	0	0	0	0	0	0	0	0	0	0	0	0	0	0	0	0	0	0	0	0	0	0	0	0	0	0	0
0	0	0	0	0	0	0	0	0	0	0	0	0	0	0	0	0	0	0	0	0	0	0	0	0	0	0	0	0	0
0	0	0	0	0	0	0	0	0	0	0	0	0	0	0	0	0	0	0	0	0	0	0	0	0	0	0	0	0	0
0	0	0	0	0	0	0	0	0	0	0	0	0	0	0	0	0	0	0	0	0	0	0	0	0	0	0	0	0	0
0	0	0	0	0	0	0	0	0	0	0	0	0	0	0	0	0	0	0	0	0	0	0	0	0	0	0	0	0	0
0	0	0	0	0	0	0	0	0	0	0	0	0	0	0	0	0	0	0	0	0	0	0	0	0	0	0	0	0	0
0	0	0	0	0	0	0	0	0	0	0	0	0	0	0	0	0	0	0	0	0	0	0	0	0	0	0	0	0	0
0	0	0	0	0	0	0	0	0	0	0	0	0	0	0	0	0	0	0	0	0	0	0	0	0	0	0	0	0	0
0	0	0	0	0	0	0	0	0	0	0	0	0	0	0	0	0	0	0	0	0	0	0	0	0	0	0	0	0	0
0	0	0	0	0	0	0	0	0	0	0	0	0	0	0	0	0	0	0	0	0	0	0	0	0	0	0	0	0	0
0	0	0	0	0	0	0	0	0	0	0	0	0	0	0	0	0	0	0	0	0	0	0	0	0	0	0	0	0	0
0	0	0	0	0	0	0	0	0	0	0	0	0	0	0	0	0	0	0	0	0	0	0	0	0	0	0	0	0	0
0	0	0	0	0	0	0	0	0	0	0	0	0	0	0	0	0	0	0	0	0	0	0	0	0	0	0	0	0	0
0	0	0	0	0	0	0	0	0	0	0	0	0	0	0	0	0	0	0	0	0	0	0	0	0	0	0	0	0	0
0	0	0	0	0	0	0	0	0	0	0	0	0	0	0	0	0	0	0	0	0	0	0	0	0	0	0	0	0	0
0	0	0	0	0	0	0	0	0	0	0	0	0	0	0	0	0	0	0	0	0	0	0	0	0	0	0	0	0	0
0	0	0	0	0	0	0	0	0	0	0	0	0	0	0	0	0	0	0	0	0	0	0	0	0	0	0	0	0	0
0	0	0	0	0	0	0	0	0	0	0	0	0	0	0	0	0	0	0	0	0	0	0	0	0	0	0	0	0	0
0	0	0	0	0	0	0	0	0	0	0	0	0	0	0	0	0	0	0	0	0	0	0	0	0	0	0	0	0	0
0	0	0	0	0	0	0	0	0	0	0	0	0	0	0	0	0	0	0	0	0	0	0	0	0	0	0	0	0	0
0	0	0	0	0	0	0	0	0	0	0	0	0	0	0	0	0	0	0	0	0	0	0	0	0	0	0	0	0	0
0	0	0	0	0	0	0	0	0	0	0	0	0	0	0	0	0	0	0	0	0	0	0	0	0	0	0	0	0	0
0	0	0	0	0	0	0	0	0	0	0	0	0	0	0	0	0	0	0	0	0	0	0	0	0	0	0	0	0	0
0	0	0	0	0	0	0	0	0	0	0	0	0	0	0	0	0	0	0	0	0	0	0	0	0	0	0	0	0	0
0	0	0	0	0	0	0	0	0	0	0	0	0	0	0	0	0	0	0	0	0	0	0	0	0	0	0	0	0	0
0	0	0	0	0	0	0	0	0	0	0	0	0	0	0	0	0	0	0	0	0	0	0	0	0	0	0	0	0	0
0	0	0	0	0	0	0	0	0	0	0	0	0	0	0	0	0	0	0	0	0	0	0	0	0	0	0	0	0	0
0	0	0	0	0	0	0	0	0	0	0	0	0	0	0	0	0	0	0	0	0	0	0	0	0	0	0	0	0	0
0	0	0	0	0	0	0	0	0	0	0	0	0	0	0	0	0	0	0	0	0	0	0	0	0	0	0	0	0	0
0	0	0	0	0	0	0	0	0	0	0	0	0	0	0	0	0	0	0	0	0	0	0	0	0	0	0	0	0	0
0	0	0	0	0	0	0	0	0	0	0	0	0	0	0	0	0	0	0	0	0	0	0	0	0	0	0	0	0	0
0	0	0	0	0	0	0	0	0	0	0	0	0	0	0	0	0	0	0	0	0	0	0	0	0	0	0	0	0	0
0	0	0	0	0	0	0	0	0	0	0	0	0	0	0	0	0	0	0	0	0	0	0	0	0	0	0	0	0	0
0	0	0	0	0	0	0	0	0	0	0	0	0	0	0	0	0	0	0	0	0	0	0	0	0	0	0	0	0	0
0	0	0	0	0	0	0	0	0	0	0	0	0	0	0	0	0	0	0	0	0	0	0	0	0	0	0	0	0	0
0	0	0	0	0	0	0	0	0	0	0	0	0	0	0	0	0	0	0	0	0	0	0	0	0	0	0	0	0	0
0	0	0	0	0	0	0	0	0	0	0	0	0	0	0	0	0	0	0	0	0	0	0	0	0	0	0	0	0	0
0	0	0	0	0	0	0	0	0	0	0	0	0	0	0	0	0	0	0	0	0	0	0	0	0	0	0	0	0	0
0	0	0	0	0	0	0	0	0	0	0	0	0	0	0	0	0	0	0	0	0	0	0	0	0	0	0	0	0	0
0	0	0	0	0	0	0	0	0	0	0	0	0	0	0	0	0	0	0	0	0	0	0	0	0	0	0	0	0	0
0	0	0	0	0	0	0	0	0	0	0	0	0	0	0	0	0	0	0	0	0	0	0	0	0	0	0	0	0	0
0	0	0	0	0	0	0	0	0	0	0	0	0	0	0	0	0	0	0	0	0	0	0	0	0	0	0	0	0	0
0	0	0	0	0	0	0	0	0	0	0	0	0	0	0	0	0	0	0	0	0	0	0	0	0	0	0	0	0	0
0	0	0	0	0	0	0	0	0	0	0	0	0	0	0	0	0	0	0	0	0	0	0	0	0	0	0	0	0	0
0	0	0	0	0	0	0	0	0	0	0	0	0	0	0	0	0	0	0	0	0	0	0	0	0	0	0	0	0	0
0	0	0	0	0	0	0	0	0	0	0	0	0	0	0	0	0	0	0	0	0	0	0	0	0	0	0	0	0	0
0	0	0	0	0	0	0	0	0	0	0	0	0	0	0	0	0	0	0	0	0	0	0	0	0	0	0	0	0	0
0	0	0	0	0	0	0	0	0	0	0	0	0	0	0	0	0	0	0	0	0	0	0	0	0	0	0	0	0	0
0	0	0	0	0	0	0	0	0	0	0	0	0	0	0	0	0	0	0	0	0	0	0	0	0	0	0	0	0	0
0	0	0	0	0	0	0	0	0	0	0	0	0	0	0	0	0	0	0	0	0	0	0	0	0	0	0	0	0	0
0	0	0	0	0	0	0	0	0	0	0	0	0	0	0	0	0	0	0	0	0	0	0	0	0	0	0	0	0	0
0	0	0	0	0	0	0	0	0	0	0	0	0	0	0	0	0	0	0	0	0	0	0	0	0	0	0	0	0	0
0	0	0	0	0	0	0	0	0	0	0	0	0	0	0	0	0	0	0	0	0	0	0	0	0	0	0	0	0	0
0	0	0	0	0	0	0	0	0	0	0	0	0	0	0	0	0	0	0	0	0	0	0	0	0	0	0	0	0	0
0	0	0	0	0	0	0	0	0	0	0	0	0	0	0	0	0	0	0	0	0	0	0	0	0	0	0	0	0	0
0	0	0	0	0	0	0	0	0	0	0	0	0	0	0	0	0	0	0	0	0	0	0	0	0	0	0	0	0	0
0	0	0	0	0	0	0	0	0	0	0	0	0	0	0	0	0	0	0	0	0	0	0	0	0	0	0	0	0	0
0	0	0	0	0	0	0	0	0	0	0	0	0	0	0	0	0	0	0	0	0	0	0	0	0	0	0	0	0	0
0	0	0	0	0	0	0	0	0	0	0	0	0	0	0	0	0	0	0	0	0	0	0	0	0	0	0	0	0	0
0	0	0	0	0	0	0	0	0	0	0	0	0	0	0	0	0	0	0	0	0	0	0	0	0	0	0	0	0	0
0	0	0	0	0	0	0	0	0	0	0	0	0	0	0	0	0	0	0	0	0	0	0	0	0	0	0	0	0	0
0	0	0	0	0	0	0	0	0	0	0	0	0	0	0	0	0	0	0	0	0	0	0	0	0	0	0	0	0	0
0	0	0	0	0	0	0	0	0	0	0	0	0	0	0	0	0	0	0	0	0	0	0	0	0	0	0	0	0	0
0	0	0	0	0	0	0	0	0	0	0	0	0	0	0	0	0	0	0	0	0	0	0	0	0	0	0	0	0	0
0	0	0	0	0	0	0	0	0	0	0	0	0	0	0	0	0	0	0	0	0	0	0	0	0	0	0	0	0	0
0	0	0	0	0	0	0	0	0	0	0	0	0	0	0	0	0	0	0	0	0	0	0	0	0	0	0	0	0	0
0	0	0	0	0	0	0	0	0	0	0	0	0	0	0	0	0	0	0	0	0	0	0	0	0	0	0	0	0	0
0	0	0	0	0	0	0	0	0	0	0	0	0	0	0	0	0	0	0	0	0	0	0	0	0	0	0	0	0	0
0	0	0	0	0	0	0	0	0	0	0	0	0	0	0	0	0	0	0	0	0	0	0	0	0	0	0	0	0	0
0	0	0	0	0	0	0	0	0	0	0	0	0	0	0	0	0	0	0	0	0	0	0	0	0	0	0	0	0	0
0	0	0	0	0	0	0	0	0	0	0	0	0	0	0	0	0	0	0	0	0	0	0	0	0	0	0	0	0	0
0	0	0	0	0	0	0	0	0	0	0	0	0	0	0	0	0	0	0	0	0	0	0	0	0	0	0	0	0	0
0	0	0	0	0	0	0	0	0	0	0	0	0	0	0	0	0	0	0	0	0	0	0	0	0	0	0	0	0	0
0	0	0	0	0	0	0	0	0	0	0	0	0	0	0	0	0	0	0	0	0	0	0	0	0	0	0	0	0	0
0	0	0	0	0	0	0	0	0	0	0	0	0	0	0	0	0	0	0	0	0	0	0	0	0	0	0	0	0	0
0	0	0	0	0	0	0	0	0	0	0	0	0	0	0	0	0	0	0	0	0	0	0	0	0	0	0	0	0	0
0	0	0	0	0	0	0	0	0	0	0	0	0	0	0	0	0	0	0	0	0	0	0	0	0	0	0	0	0	0
0	0	0	0	0	0	0	0	0	0	0	0	0	0	0	0	0	0	0	0	0	0	0	0	0	0	0	0	0	0
0	0	0	0	0	0	0	0	0	0	0	0	0	0	0	0	0	0	0	0	0	0	0	0	0	0	0	0	0	0
0	0	0	0	0	0	0	0	0	0	0	0	0	0	0	0	0	0	0	0	0	0	0	0	0	0	0	0	0	0
0	0	0	0	0	0	0	0	0	0	0	0	0	0	0	0	0	0	0	0	0	0	0	0	0	0	0	0	0	0
0	0	0	0	0	0	0	0	0	0	0	0	0	0	0	0	0	0	0	0	0	0	0	0	0	0	0	0	0	0
0	0	0	0	0	0	0	0	0	0	0	0	0	0	0	0	0	0	0	0	0	0	0	0	0	0	0	0	0	0
0	0	0	0	0	0	0	0	0	0	0	0	0	0	0	0	0	0	0	0	0	0	0	0	0	0	0	0	0	0
0	0	0	0	0	0	0	0	0	0	0	0	0	0	0	0	0	0	0	0	0	0	0	0	0	0	0	0	0	0
0	0	0	0	0	0	0	0	0	0	0	0	0	0	0	0	0	0	0	0	0	0	0	0	0	0	0	0	0	0
0	0	0	0	0	0	0	0	0	0	0	0	0	0	0	0	0	0	0	0	0	0	0	0	0	0	0	0	0	0
0	0	0	0	0	0	0	0	0	0	0	0	0	0	0	0	0	0	0	0	0	0	0	0	0	0	0	0	0	0
0	0	0	0	0	0	0	0	0	0	0	0	0	0	0	0	0	0	0	0	0	0	0	0	0	0	0	0	0	0
0	0	0	0	0	0	0	0	0	0	0	0	0	0	0	0	0	0	0	0	0	0	0	0	0	0	0	0	0	0
0	0	0	0	0	0	0	0	0	0	0	0	0	0	0	0	0	0	0	0	0	0	0	0	0	0	0	0	0	0
0	0	0	0	0	0	0	0	0	0	0	0	0	0	0	0	0	0	0	0	0	0	0	0	0	0	0	0	0	0
0	0	0	0	0	0	0	0	0	0	0	0	0	0	0	0	0	0	0	0	0	0	0	0	0	0	0	0	0	0
0	0	0	0	0	0	0	0	0	0	0	0	0	0	0	0	0	0	0	0	0	0	0	0	0	0	0	0	0	0
0	0	0	0	0	0	0	0	0	0	0	0	0	0	0	0	0	0	0	0	0	0	0	0	0	0	0	0	0	0
0	0	0	0	0	0	0	0	0	0	0	0	0	0	0	0	0	0	0	0	0	0	0	0	0	0	0	0	0	0
0	0	0	0	0	0	0	0	0	0	0	0	0	0	0	0	0	0	0	0	0	0	0	0	0	0	0	0	0	0
0	0	0	0	0	0	0	0	0	0	0	0	0	0	0	0	0	0	0	0	0	0	0	0	0	0	0	0	0	0
0	0	0	0	0	0	0	0	0	0	0	0	0	0	0	0	0	0	0	0	0	0	0	0	0	0	0	0	0	0
0	0	0	0	0	0	0	0	0	0	0	0	0	0	0	0	0	0	0	0	0	0	0	0	0	0	0	0	0	0
0	0	0	0	0	0	0	0	0	0	0	0	0	0	0	0	0	0	0	0	0	0	0	0	0	0	0	0	0	0
0	0	0	0	0	0	0	0	0	0	0	0	0	0	0	0	0	0	0	0	0	0	0	0	0	0	0	0	0	0
0	0	0	0	0	0	0	0	0	0	0	0	0	0	0	0	0	0	0	0	0	0	0	0	0	0	0	0	0	0
0	0	0	0	0	0	0	0	0	0	0	0	0	0	0	0	0	0	0	0	0	0	0	0	0	0	0	0	0	0
0	0	0	0	0	0	0	0	0	0	0	0	0	0	0	0	0	0	0	0	0	0	0	0	0	0	0	0	0	0
0	0	0	0	0	0	0	0	0	0	0	0	0	0	0	0	0	0	0	0	0	0	0	0	0	0	0	0	0	0
0	0	0	0	0	0	0	0	0	0	0	0	0	0	0	0	0	0	0	0	0	0	0	0	0	0	0	0	0	0
0	0	0	0	0	0	0	0	0	0	0	0	0	0	0	0	0	0	0	0	0	0	0	0	0	0	0	0	0	0
0	0	0	0	0	0	0	0	0	0	0	0	0	0	0	0	0	0	0	0	0	0	0	0	0	0	0	0	0	0
0	0	0	0	0	0	0	0	0	0	0	0	0	0	0	0	0	0	0	0	0	0	0	0	0	0	0	0	0	0
0	0	0	0	0	0	0	0	0	0	0	0	0	0	0	0	0	0	0	0	0	0	0	0	0	0	0	0	0	0
0	0	0	0	0	0	0	0	0	0	0	0	0	0	0	0	0	0	0	0	0	0	0	0	0	0	0	0	0	0
0	0	0	0	0	0	0	0	0	0	0	0	0	0	0	0	0	0	0	0	0	0	0	0	0	0	0	0	0	0
0	0	0	0	0	0	0	0	0	0	0	0	0	0	0	0	0	0	0	0	0	0	0	0	0	0	0	0	0	0
0	0	0	0	0	0	0	0	0	0	0	0	0	0	0	0	0	0	0	0	0	0	0	0	0	0	0	0	0	0
0	0	0	0	0	0	0	0	0	0	0	0	0	0	0	0	0	0	0	0	0	0	0	0	0	0	0	0	0	0
0	0	0	0	0	0	0	0	0	0	0	0	0	0	0	0	0	0	0	0	0	0	0	0	0	0	0	0	0	0
0	0	0	0	0	0	0	0	0	0	0	0	0	0	0	0	0	0	0	0	0	0	0	0	0	0	0	0	0	0
0	0	0	0	0	0	0	0	0	0	0	0	0	0	0	0	0	0	0	0	0	0	0	0	0	0	0	0	0	0
0	0	0	0	0	0	0	0	0	0	0	0	0	0	0	0	0	0	0	0	0	0	0	0	0	0	0	0	0	0
0	0	0	0	0	0	0	0	0	0	0	0	0	0	0	0	0	0	0	0	0	0	0	0	0	0	0	0	0	0
0	0	0	0	0	0	0	0	0	0	0	0	0	0	0	0	0	0	0	0	0	0	0	0	0	0	0	0	0	0
0	0	0	0	0	0	0	0	0	0	0	0	0	0	0	0	0	0	0	0	0	0	0	0	0	0	0	0	0	0
0	0	0	0	0	0	0	0	0	0	0	0	0	0	0	0	0	0	0	0	0	0	0	0	0	0	0	0	0	0
0	0	0	0	0	0	0	0	0	0	0	0	0	0	0	0	0	0	0	0	0	0	0	0	0	0	0	0	0	0
0	0	0	0	0	0	0	0	0	0	0	0	0	0	0	0	0	0	0	0	0	0	0	0	0	0	0	0	0	0
0	0	0	0	0	0	0	0	0	0	0	0	0	0	0	0	0	0	0	0	0	0	0	0	0	0	0	0	0	0
0	0	0	0	0	0	0	0	0	0	0	0	0	0	0	0	0	0	0	0	0	0	0	0	0	0	0	0	0	0
0	0	0	0	0	0	0	0	0	0	0	0	0	0	0	0	0	0	0	0	0	0	0	0	0	0	0	0	0	0
0	0	0	0	0	0	0	0	0	0	0	0	0	0	0	0	0	0	0	0	0	0	0	0	0	0	0	0	0	0
0	0	0	0	0	0	0	0	0	0	0	0	0	0	0	0	0	0	0	0	0	0	0	0	0	0	0	0	0	0
0	0	0	0	0	0	0	0	0	0	0	0	0	0	0	0	0	0	0	0	0	0	0	0	0	0	0	0	0	0
0	0	0	0	0	0	0	0	0	0	0	0	0	0	0	0	0	0	0	0	0	0	0	0	0	0	0	0	0	0
0	0	0	0	0	0	0	0	0	0	0	0	0	0	0	0	0	0	0	0	0	0	0	0	0	0	0	0	0	0
0	0	0	0	0	0	0	0	0	0	0	0	0	0	0	0	0	0	0	0	0	0	0	0	0	0	0	0	0	0
0	0	0	0	0	0	0	0	0	0	0	0	0	0	0	0	0	0	0	0	0	0	0	0	0	0	0	0	0	0
0	0	0	0	0	0	0	0	0	0	0	0	0	0	0	0	0	0	0	0	0	0	0	0	0	0	0	0	0	0
0	0	0	0	0	0	0	0	0	0	0	0	0	0	0	0	0	0	0	0	0	0	0	0	0	0	0	0	0	0
0	0	0	0	0	0	0	0	0	0	0	0	0	0	0	0	0	0	0	0	0	0	0	0	0	0	0	0	0	0
0	0	0	0	0	0	0	0	0	0	0	0	0	0	0	0	0	0	0	0	0	0	0	0	0	0	0	0	0	0
0	0	0	0	0	0	0	0	0	0	0	0	0	0	0	0	0	0	0	0	0	0	0	0	0	0	0	0	0	0
0	0	0	0	0	0	0	0	0	0	0	0	0	0	0	0	0	0	0	0	0	0	0	0	0	0	0	0	0	0
0	0	0	0	0	0	0	0	0	0	0	0	0	0	0	0	0	0	0	0	0	0	0	0	0	0	0	0	0	0
0	0	0	0	0	0	0	0	0	0	0	0	0	0	0	0	0	0	0	0	0	0	0	0	0	0	0	0	0	0
0	0	0	0	0	0	0	0	0	0	0	0	0	0	0	0	0	0	0	0	0	0	0	0	0	0	0	0	0	0
0	0	0	0	0	0	0	0	0	0	0	0	0	0	0	0	0	0	0	0	0	0	0	0	0	0	0	0	0	0
0	0	0	0	0	0	0	0	0	0	0	0	0	0	0	0	0	0	0	0	0	0	0	0	0	0	0	0	0	0
0	0	0	0	0	0	0	0	0	0	0	0	0	0	0	0	0	0	0	0	0	0	0	0	0	0	0	0	0	0
0	0	0	0	0	0	0	0	0	0	0	0	0	0	0	0	0	0	0	0	0	0	0	0	0	0	0	0	0	0
0	0	0	0	0	0	0	0	0	0	0	0	0	0	0	0	0	0	0	0	0	0	0	0	0	0	0	0	0	0
0	0	0	0	0	0	0	0	0	0	0	0	0	0	0	0	0	0	0	0	0	0	0	0	0	0	0	0	0	0
0	0	0	0	0	0	0	0	0	0	0	0	0	0	0	0	0	0	0	0	0	0	0	0	0	0	0	0	0	0
0	0	0	0	0	0	0	0	0	0	0	0	0	0	0	0	0	0	0	0	0	0	0	0	0	0	0	0	0	0
0	0	0	0	0	0	0	0	0	0	0	0	0	0	0	0	0	0	0	0	0	0	0	0	0	0	0	0	0	0
0	0	0	0	0	0	0	0	0	0	0	0	0	0	0	0	0	0	0	0	0	0	0	0	0	0	0	0	0	0
0	0	0	0	0	0	0	0	0	0	0	0	0	0	0	0	0	0	0	0	0	0	0	0	0	0	0	0	0	0
0	0	0	0	0	0	0	0	0	0	0	0	0	0	0	0	0	0	0	0	0	0	0	0	0	0	0	0	0	0
0	0	0	0	0	0	0	0	0	0	0	0	0	0	0	0	0	0	0	0	0	0	0	0	0	0	0	0	0	0
0	0	0	0	0	0	0	0	0	0	0	0	0	0	0	0	0	0	0	0	0	0	0	0	0	0	0	0	0	0
0	0	0	0	0	0	0	0	0	0	0	0	0	0	0	0	0	0	0	0	0	0	0	0	0	0	0	0	0	0
0	0	0	0	0	0	0	0	0	0	0	0	0	0	0	0	0	0	0	0	0	0	0	0	0	0	0	0	0	0
0	0	0	0	0	0	0	0	0	0	0	0	0	0	0	0	0	0	0	0	0	0	0	0	0	0	0	0	0	0
0	0	0	0	0	0	0	0	0	0	0	0	0	0	0	0	0	0	0	0	0	0	0	0	0	0	0	0	0	0
0	0	0	0	0	0	0	0	0	0	0	0	0	0	0	0	0	0	0	0	0	0	0	0	0	0	0	0	0	0
0	0	0	0	0	0	0	0	0	0	0	0	0	0	0	0	0	0	0	0	0	0	0	0	0	0	0	0	0	0
0	0	0	0	0	0	0	0	0	0	0	0	0	0	0	0	0	0	0	0	0	0	0	0	0	0	0	0	0	0
0	0	0	0	0	0	0	0	0	0	0	0	0	0	0	0	0	0	0	0	0	0	0	0	0	0	0	0	0	0
0	0	0	0	0	0	0	0	0	0	0	0	0	0	0	0	0	0	0	0	0	0	0	0	0	0	0	0	0	0
0	0	0	0	0	0	0	0	0	0	0	0	0	0	0	0	0	0	0	0	0	0	0	0	0	0	0	0	0	0
0	0	0	0	0	0	0	0	0	0	0	0	0	0	0	0	0	0	0	0	0	0	0	0	0	0	0	0	0	0
0	0	0	0	0	0	0	0	0	0	0	0	0	0	0	0	0	0	0	0	0	0	0	0	0	0	0	0	0	0
0	0	0	0	0	0	0	0	0	0	0	0	0	0	0	0	0	0	0	0	0	0	0	0	0	0	0	0	0	0
0	0	0	0	0	0	0	0	0	0	0	0	0	0	0	0	0	0	0	0	0	0	0	0	0	0	0	0	0	0
0	0	0	0	0	0	0	0	0	0	0	0	0	0	0	0	0	0	0	0	0	0	0	0	0	0	0	0	0	0
0	0	0	0	0	0	0	0	0	0	0	0	0	0	0	0	0	0	0	0	0	0	0	0	0	0	0	0	0	0
0	0	0	0	0	0	0	0	0	0	0	0	0	0	0	0	0	0	0	0	0	0	0	0	0	0	0	0	0	0
0	0	0	0	0	0	0	0	0	0	0	0	0	0	0	0	0	0	0	0	0	0	0	0	0	0	0	0	0	0
0	0	0	0	0	0	0	0	0	0	0	0	0	0	0	0	0	0	0	0	0	0	0	0	0	0	0	0	0	0
0	0	0	0	0	0	0	0	0	0	0	0	0	0	0	0	0	0	0	0	0	0	0	0	0	0	0	0	0	0
0	0	0	0	0	0	0	0	0	0	0	0	0	0	0	0	0	0	0	0	0	0	0	0	0	0	0	0	0	0
0	0	0	0	0	0	0	0	0	0	0	0	0	0	0	0	0	0	0	0	0	0	0	0	0	0	0	0	0	0
0	0	0	0	0	0	0	0	0	0	0	0	0	0	0	0	0	0	0	0	0	0	0	0	0	0	0	0	0	0
0	0	0	0	0	0	0	0	0	0	0	0	0	0	0	0	0	0	0	0	0	0	0	0	0	0	0	0	0	0
0	0	0	0	0	0	0	0	0	0	0	0	0	0	0	0	0	0	0	0	0	0	0	0	0	0	0	0	0	0
0	0	0	0	0	0	0	0	0	0	0	0	0	0	0	0	0	0	0	0	0	0	0	0	0	0	0	0	0	0
0	0	0	0	0	0	0	0	0	0	0	0	0	0	0	0	0	0	0	0	0	0	0	0	0	0	0	0	0	0
0	0	0	0	0	0	0	0	0	0	0	0	0	0	0	0	0	0	0	0	0	0	0	0	0	0	0	0	0	0
0	0	0	0	0	0	0	0	0	0	0	0	0	0	0	0	0	0	0	0	0	0	0	0	0	0	0	0	0	0
0	0	0	0	0	0	0	0	0	0	0	0	0	0	0	0	0	0	0	0	0	0	0	0	0	0	0	0	0	0
0	0	0	0	0	0	0	0	0	0	0	0	0	0	0	0	0	0	0	0	0	0	0	0	0	0	0	0	0	0
0	0	0	0	0	0	0	0	0	0	0	0	0	0	0	0	0	0	0	0	0	0	0	0	0	0	0	0	0	0
0	0	0	0	0	0	0	0	0	0	0	0	0	0	0	0	0	0	0	0	0	0	0	0	0	0	0	0	0	0
0	0	0	0	0	0	0	0	0	0	0	0	0	0	0	0	0	0	0	0	0	0	0	0	0	0	0	0	0	0
0	0	0	0	0	0	0	0	0	0	0	0	0	0	0	0	0	0	0	0	0	0	0	0	0	0	0	0	0	0
0	0	0	0	0	0	0	0	0	0	0	0	0	0	0	0	0	0	0	0	0	0	0	0	0	0	0	0	0	0
0	0	0	0	0	0	0	0	0	0	0	0	0	0	0	0	0	0	0	0	0	0	0	0	0	0	0	0	0	0
0	0	0	0	0	0	0	0	0	0	0	0	0	0	0	0	0	0	0	0	0	0	0	0	0	0	0	0	0	0
0	0	0	0	0	0	0	0	0	0	0	0	0	0	0	0	0	0	0	0	0	0	0	0	0	0	0	0	0	0
0	0	0	0	0	0	0	0	0	0	0	0	0	0	0	0	0	0	0	0	0	0	0	0	0	0	0	0	0	0
0	0	0	0	0	0	0	0	0	0	0	0	0	0	0	0	0	0	0	0	0	0	0	0	0	0	0	0	0	0
0	0	0	0	0	0	0	0	0	0	0	0	0	0	0	0	0	0	0	0	0	0	0	0	0	0	0	0	0	0
0	0	0	0	0	0	0	0	0	0	0	0	0	0	0	0	0	0	0	0	0	0	0	0	0	0	0	0	0	0
0	0	0	0	0	0	0	0	0	0	0	0	0	0	0	0	0	0	0	0	0	0	0	0	0	0	0	0	0	0
0	0	0	0	0	0	0	0	0	0	0	0	0	0	0	0	0	0	0	0	0	0	0	0	0	0	0	0	0	0
0	0	0	0	0	0	0	0	0	0	0	0	0	0	0	0	0	0	0	0	0	0	0	0	0	0	0	0	0	0
0	0	0	0	0	0	0	0	0	0	0	0	0	0	0	0	0	0	0	0	0	0	0	0	0	0	0	0	0	0
0	0	0	0	0	0	0	0	0	0	0	0	0	0	0	0	0	0	0	0	0	0	0	0	0	0	0	0	0	0
0	0	0	0	0	0	0	0	0	0	0	0	0	0	0	0	0	0	0	0	0	0	0	0	0	0	0	0	0	0
0	0	0	0	0	0	0	0	0	0	0	0	0	0	0	0	0	0	0	0	0	0	0	0	0	0	0	0	0	0
0	0	0	0	0	0	0	0	0	0	0	0	0	0	0	0	0	0	0	0	0	0	0	0	0	0	0	0	0	0
0	0	0	0	0	0	0	0	0	0	0	0	0	0	0	0	0	0	0	0	0	0	0	0	0	0	0	0	0	0
0	0	0	0	0	0	0	0	0	0	0	0	0	0	0	0	0	0	0	0	0	0	0	0	0	0	0	0	0	0
0	0	0	0	0	0	0	0	0	0	0	0	0	0	0	0	0	0	0	0	0	0	0	0	0	0	0	0	0	0
0	0	0	0	0	0	0	0	0	0	0	0	0	0	0	0	0	0	0	0	0	0	0	0	0	0	0	0	0	0
0	0	0	0	0	0	0	0	0	0	0	0	0	0	0	0	0	0	0	0	0	0	0	0	0	0	0	0	0	0
0	0	0	0	0	0	0	0	0	0	0	0	0	0	0	0	0	0	0	0	0	0	0	0	0	0	0	0	0	0
0	0	0	0	0	0	0	0	0	0	0	0	0	0	0	0	0	0	0	0	0	0	0	0	0	0	0	0	0	0
0	0	0	0	0	0	0	0	0	0	0	0	0	0	0	0	0	0	0	0	0	0	0	0	0	0	0	0	0	0
0	0	0	0	0	0	0	0	0	0	0	0	0	0	0	0	0	0	0	0	0	0	0	0	0	0	0	0	0	0
0	0	0	0	0	0	0	0	0	0	0	0	0	0	0	0	0	0	0	0	0	0	0	0	0	0	0	0	0	0
0	0	0	0	0	0	0	0	0	0	0	0	0	0	0	0	0	0	0	0	0	0	0	0	0	0	0	0	0	0
0	0	0	0	0	0	0	0	0	0	0	0	0	0	0	0	0	0	0	0	0	0	0	0	0	0	0	0	0	0
0	0	0	0	0	0	0	0	0	0	0	0	0	0	0	0	0	0	0	0	0	0	0	0	0	0	0	0	0	0
0	0	0	0	0	0	0	0	0	0	0	0	0	0	0	0	0	0	0	0	0	0	0	0	0	0	0	0	0	0
0	0	0	0	0	0	0	0	0	0	0	0	0	0	0	0	0	0	0	0	0	0	0	0	0	0	0	0	0	0
0	0	0	0	0	0	0	0	0	0	0	0	0	0	0	0	0	0	0	0	0	0	0	0	0	0	0	0	0	0
0	0	0	0	0	0	0	0	0	0	0	0	0	0	0	0	0	0	0	0	0	0	0	0	0	0	0	0	0	0
0	0	0	0	0	0	0	0	0	0	0	0	0	0	0	0	0	0	0	0	0	0	0	0	0	0	0	0	0	0
0	0	0	0	0	0	0	0	0	0	0	0	0	0	0	0	0	0	0	0	0	0	0	0	0	0	0	0	0	0
0	0	0	0	0	0	0	0	0	0	0	0	0	0	0	0	0	0	0	0	0	0	0	0	0	0	0	0	0	0
0	0	0	0	0	0	0	0	0	0	0	0	0	0	0	0	0	0	0	0	0	0	0	0	0	0	0	0	0	0
0	0	0	0	0	0	0	0	0	0	0	0	0	0	0	0	0	0	0	0	0	0	0	0	0	0	0	0	0	0
0	0	0	0	0	0	0	0	0	0	0	0	0	0	0	0	0	0	0	0	0	0	0	0	0	0	0	0	0	0
0	0	0	0	0	0	0	0	0	0	0	0	0	0	0	0	0	0	0	0	0	0	0	0	0	0	0	0	0	0
0	0	0	0	0	0	0	0	0	0	0	0	0	0	0	0	0	0	0	0	0	0	0	0	0	0	0	0	0	0
0	0	0	0	0	0	0	0	0	0	0	0	0	0	0	0	0	0	0	0	0	0	0	0	0	0	0	0	0	0
0	0	0	0	0	0	0	0	0	0	0	0	0	0	0	0	0	0	0	0	0	0	0	0	0	0	0	0	0	0
0	0	0	0	0	0	0	0	0	0	0	0	0	0	0	0	0	0	0	0	0	0	0	0	0	0	0	0	0	0
0	0	0	0	0	0	0	0	0	0	0	0	0	0	0	0	0	0	0	0	0	0	0	0	0	0	0	0	0	0
0	0	0	0	0	0	0	0	0	0	0	0	0	0	0	0	0	0	0	0	0	0	0	0	0	0	0	0	0	0
0	0	0	0	0	0	0	0	0	0	0	0	0	0	0	0	0	0	0	0	0	0	0	0	0	0	0	0	0	0
0	0	0	0	0	0	0	0	0	0	0	0	0	0	0	0	0	0	0	0	0	0	0	0	0	0	0	0	0	0
0	0	0	0	0	0	0	0	0	0	0	0	0	0	0	0	0	0	0	0	0	0	0	0	0	0	0	0	0	0
0	0	0	0	0	0	0	0	0	0	0	0	0	0	0	0	0	0	0	0	0	0	0	0	0	0	0	0	0	0
0	0	0	0	0	0	0	0	0	0	0	0	0	0	0	0	0	0	0	0	0	0	0	0	0	0	0	0	0	0
0	0	0	0	0	0	0	0	0	0	0	0	0	0	0	0	0	0	0	0	0	0	0	0	0	0	0	0	0	0
0	0	0	0	0	0	0	0	0	0	0	0	0	0	0	0	0	0	0	0	0	0	0	0	0	0	0	0	0	0
0	0	0	0	0	0	0	0	0	0	0	0	0	0	0	0	0	0	0	0	0	0	0	0	0	0	0	0	0	0
0	0	0	0	0	0	0	0	0	0	0	0	0	0	0	0	0	0	0	0	0	0	0	0	0	0	0	0	0	0
0	0	0	0	0	0	0	0	0	0	0	0	0	0	0	0	0	0	0	0	0	0	0	0	0	0	0	0	0	0
0	0	0	0	0	0	0	0	0	0	0	0	0	0	0	0	0	0	0	0	0	0	0	0	0	0	0	0	0	0
0	0	0	0	0	0	0	0	0	0	0	0	0	0	0	0	0	0	0	0	0	0	0	0	0	0	0	0	0	0
0	0	0	0	0	0	0	0	0	0	0	0	0	0	0	0	0	0	0	0	0	0	0	0	0	0	0	0	0	0
0	0	0	0	0	0	0	0	0	0	0	0	0	0	0	0	0	0	0	0	0	0	0	0	0	0	0	0	0	0
0	0	0	0	0	0	0	0	0	0	0	0	0	0	0	0	0	0	0	0	0	0	0	0	0	0	0	0	0	0
0	0	0	0	0	0	0	0	0	0	0	0	0	0	0	0	0	0	0	0	0	0	0	0	0	0	0	0	0	0
0	0	0	0	0	0	0	0	0	0	0	0	0	0	0	0	0	0	0	0	0	0	0	0	0	0	0	0	0	0
0	0	0	0	0	0	0	0	0	0	0	0	0	0	0	0	0	0	0	0	0	0	0	0	0	0	0	0	0	0
0	0	0	0	0	0	0	0	0	0	0	0	0	0	0	0	0	0	0	0	0	0	0	0	0	0	0	0	0	0
0	0	0	0	0	0	0	0	0	0	0	0	0	0	0	0	0	0	0	0	0	0	0	0	0	0	0	0	0	0
0	0	0	0	0	0	0	0	0	0	0	0	0	0	0	0	0	0	0	0	0	0	0	0	0	0	0	0	0	0
0	0	0	0	0	0	0	0	0	0	0	0	0	0	0	0	0	0	0	0	0	0	0	0	0	0	0	0	0	0
0	0	0	0	0	0	0	0	0	0	0	0	0	0	0	0	0	0	0	0	0	0	0	0	0	0	0	0	0	0
0	0	0	0	0	0	0	0	0	0	0	0	0	0	0	0	0	0	0	0	0	0	0	0	0	0	0	0	0	0
0	0	0	0	0	0	0	0	0	0	0	0	0	0	0	0	0	0	0	0	0	0	0	0	0	0	0	0	0	0
0	0	0	0	0	0	0	0	0	0	0	0	0	0	0	0	0	0	0	0	0	0	0	0	0	0	0	0	0	0
0	0	0	0	0	0	0	0	0	0	0	0	0	0	0	0	0	0	0	0	0	0	0	0	0	0	0	0	0	0
0	0	0	0	0	0	0	0	0	0	0	0	0	0	0	0	0	0	0	0	0	0	0	0	0	0	0	0	0	0
0	0	0	0	0	0	0	0	0	0	0	0	0	0	0	0	0	0	0	0	0	0	0	0	0	0	0	0	0	0
0	0	0	0	0	0	0	0	0	0	0	0	0	0	0	0	0	0	0	0	0	0	0	0	0	0	0	0	0	0
0	0	0	0	0	0	0	0	0	0	0	0	0	0	0	0	0	0	0	0	0	0	0	0	0	0	0	0	0	0
0	0	0	0	0	0	0	0	0	0	0	0	0	0	0	0	0	0	0	0	0	0	0	0	0	0	0	0	0	0
0	0	0	0	0	0	0	0	0	0	0	0	0	0	0	0	0	0	0	0	0	0	0	0	0	0	0	0	0	0
0	0	0	0	0	0	0	0	0	0	0	0	0	0	0	0	0	0	0	0	0	0	0	0	0	0	0	0	0	0
0	0	0	0	0	0	0	0	0	0	0	0	0	0	0	0	0	0	0	0	0	0	0	0	0	0	0	0	0	0
0	0	0	0	0	0	0	0	0	0	0	0	0	0	0	0	0	0	0	0	0	0	0	0	0	0	0	0	0	0
0	0	0	0	0	0	0	0	0	0	0	0	0	0	0	0	0	0	0	0	0	0	0	0	0	0	0	0	0	0
0	0	0	0	0	0	0	0	0	0	0	0	0	0	0	0	0	0	0	0	0	0	0	0	0	0	0	0	0	0
0	0	0	0	0	0	0	0	0	0	0	0	0	0	0	0	0	0	0	0	0	0	0	0	0	0	0	0	0	0
0	0	0	0	0	0	0	0	0	0	0	0	0	0	0	0	0	0	0	0	0	0	0	0	0	0	0	0	0	0
0	0	0	0	0	0	0	0	0	0	0	0	0	0	0	0	0	0	0	0	0	0	0	0	0	0	0	0	0	0
0	0	0	0	0	0	0	0	0	0	0	0	0	0	0	0	0	0	0	0	0	0	0	0	0	0	0	0	0	0
0	0	0	0	0	0	0	0	0	0	0	0	0	0	0	0	0	0	0	0	0	0	0	0	0	0	0	0	0	0
0	0	0	0	0	0	0	0	0	0	0	0	0	0	0	0	0	0	0	0	0	0	0	0	0	0	0	0	0	0
0	0	0	0	0	0	0	0	0	0	0	0	0	0	0	0	0	0	0	0	0	0	0	0	0	0	0	0	0	0
0	0	0	0	0	0	0	0	0	0	0	0	0	0	0	0	0	0	0	0	0	0	0	0	0	0	0	0	0	0
0	0	0	0	0	0	0	0	0	0	0	0	0	0	0	0	0	0	0	0	0	0	0	0	0	0	0	0	0	0
0	0	0	0	0	0	0	0	0	0	0	0	0	0	0	0	0	0	0	0	0	0	0	0	0	0	0	0	0	0
0	0	0	0	0	0	0	0	0	0	0	0	0	0	0	0	0	0	0	0	0	0	0	0	0	0	0	0	0	0
0	0	0	0	0	0	0	0	0	0	0	0	0	0	0	0	0	0	0	0	0	0	0	0	0	0	0	0	0	0
0	0	0	0	0	0	0	0	0	0	0	0	0	0	0	0	0	0	0	0	0	0	0	0	0	0	0	0	0	0
0	0	0	0	0	0	0	0	0	0	0	0	0	0	0	0	0	0	0	0	0	0	0	0	0	0	0	0	0	0
0	0	0	0	0	0	0	0	0	0	0	0	0	0	0	0	0	0	0	0	0	0	0	0	0	0	0	0	0	0
0	0	0	0	0	0	0	0	0	0	0	0	0	0	0	0	0	0	0	0	0	0	0	0	0	0	0	0	0	0
0	0	0	0	0	0	0	0	0	0	0	0	0	0	0	0	0	0	0	0	0	0	0	0	0	0	0	0	0	0
0	0	0	0	0	0	0	0	0	0	0	0	0	0	0	0	0	0	0	0	0	0	0	0	0	0	0	0	0	0
0	0	0	0	0	0	0	0	0	0	0	0	0	0	0	0	0	0	0	0	0	0	0	0	0	0	0	0	0	0
0	0	0	0	0	0	0	0	0	0	0	0	0	0	0	0	0	0	0	0	0	0	0	0	0	0	0	0	0	0
0	0	0	0	0	0	0	0	0	0	0	0	0	0	0	0	0	0	0	0	0	0	0	0	0	0	0	0	0	0
0	0	0	0	0	0	0	0	0	0	0	0	0	0	0	0	0	0	0	0	0	0	0	0	0	0	0	0	0	0
0	0	0	0	0	0	0	0	0	0	0	0	0	0	0	0	0	0	0	0	0	0	0	0	0	0	0	0	0	0
0	0	0	0	0	0	0	0	0	0	0	0	0	0	0	0	0	0	0	0	0	0	0	0	0	0	0	0	0	0
0	0	0	0	0	0	0	0	0	0	0	0	0	0	0	0	0	0	0	0	0	0	0	0	0	0	0	0	0	0
0	0	0	0	0	0	0	0	0	0	0	0	0	0	0	0	0	0	0	0	0	0	0	0	0	0	0	0	0	0
0	0	0	0	0	0	0	0	0	0	0	0	0	0	0	0	0	0	0	0	0	0	0	0	0	0	0	0	0	0
0	0	0	0	0	0	0	0	0	0	0	0	0	0	0	0	0	0	0	0	0	0	0	0	0	0	0	0	0	0
0	0	0	0	0	0	0	0	0	0	0	0	0	0	0	0	0	0	0	0	0	0	0	0	0	0	0	0	0	0
0	0	0	0	0	0	0	0	0	0	0	0	0	0	0	0	0	0	0	0	0	0	0	0	0	0	0	0	0	0
0	0	0	0	0	0	0	0	0	0	0	0	0	0	0	0	0	0	0	0	0	0	0	0	0	0	0	0	0	0
0	0	0	0	0	0	0	0	0	0	0	0	0	0	0	0	0	0	0	0	0	0	0	0	0	0	0	0	0	0
0	0	0	0	0	0	0	0	0	0	0	0	0	0	0	0	0	0	0	0	0	0	0	0	0	0	0	0	0	0
0	0	0	0	0	0	0	0	0	0	0	0	0	0	0	0	0	0	0	0	0	0	0	0	0	0	0	0	0	0
0	0	0	0	0	0	0	0	0	0	0	0	0	0	0	0	0	0	0	0	0	0	0	0	0	0	0	0	0	0
0	0	0	0	0	0	0	0	0	0	0	0	0	0	0	0	0	0	0	0	0	0	0	0	0	0	0	0	0	0
0	0	0	0	0	0	0	0	0	0	0	0	0	0	0	0	0	0	0	0	0	0	0	0	0	0	0	0	0	0
0	0	0	0	0	0	0	0	0	0	0	0	0	0	0	0	0	0	0	0	0	0	0	0	0	0	0	0	0	0
0	0	0	0	0	0	0	0	0	0	0	0	0	0	0	0	0	0	0	0	0	0	0	0	0	0	0	0	0	0
0	0	0	0	0	0	0	0	0	0	0	0	0	0	0	0	0	0	0	0	0	0	0	0	0	0	0	0	0	0
0	0	0	0	0	0	0	0	0	0	0	0	0	0	0	0	0	0	0	0	0	0	0	0	0	0	0	0	0	0
0	0	0	0	0	0	0	0	0	0	0	0	0	0	0	0	0	0	0	0	0	0	0	0	0	0	0	0	0	0
0	0	0	0	0	0	0	0	0	0	0	0	0	0	0	0	0	0	0	0	0	0	0	0	0	0	0	0	0	0
0	0	0	0	0	0	0	0	0	0	0	0	0	0	0	0	0	0	0	0	0	0	0	0	0	0	0	0	0	0
0	0	0	0	0	0	0	0	0	0	0	0	0	0	0	0	0	0	0	0	0	0	0	0	0	0	0	0	0	0
0	0	0	0	0	0	0	0	0	0	0	0	0	0	0	0	0	0	0	0	0	0	0	0	0	0	0	0	0	0
0	0	0	0	0	0	0	0	0	0	0	0	0	0	0	0	0	0	0	0	0	0	0	0	0	0	0	0	0	0
0	0	0	0	0	0	0	0	0	0	0	0	0	0	0	0	0	0	0	0	0	0	0	0	0	0	0	0	0	0
0	0	0	0	0	0	0	0	0	0	0	0	0	0	0	0	0	0	0	0	0	1	0	0	0	0	0	0	0	0
0	0	0	0	0	0	0	0	0	0	0	0	0	0	0	0	0	0	0	0	0	0	0	0	0	0	0	0	0	0
0	0	0	0	0	0	0	0	0	0	0	0	0	0	0	0	0	0	0	0	0	0	0	0	0	0	0	0	0	0
0	0	0	0	0	0	0	0	0	0	0	0	0	0	0	0	0	0	0	0	0	0	0	0	0	0	0	0	0	0
0	0	0	0	0	0	0	0	0	0	0	0	0	0	0	0	0	0	0	0	0	0	0	0	0	0	0	0	0	0
0	0	0	0	0	0	0	0	0	0	0	0	0	0	0	0	0	0	0	0	0	0	0	0	0	0	0	0	0	0
0	0	0	0	0	0	0	0	0	0	0	0	0	0	0	0	0	0	0	0	0	0	0	0	0	0	0	0	0	0
0	0	0	0	0	0	0	0	0	0	0	0	0	0	0	0	0	0	0	0	0	0	0	0	0	0	0	0	0	0
0	0	0	0	0	0	0	0	0	0	0	0	0	0	0	0	0	0	0	0	0	0	0	0	0	0	0	0	0	0
0	0	0	0	0	0	0	0	0	0	0	0	0	0	0	0	0	0	0	0	0	0	0	0	0	0	0	0	0	0
0	0	0	0	0	0	0	0	0	0	0	0	0	0	0	0	0	0	0	0	0	0	0	0	0	0	0	0	0	0
0	0	0	0	0	0	0	0	0	0	0	0	0	0	0	0	0	0	0	0	0	0	0	0	0	0	0	0	0	0

## Sheet: DivisionMatrix
0	0	0	0	0	0	0	0	0	0	0	0	0	0	0	0	0	0	0	0	0	0	0	0	0	0	0	0	0	0
0	0	0	0	0	0	0	0	0	0	0	0	0	0	0	0	0	0	0	0	0	0	0	0	0	0	0	0	0	0
0	0	0	0	0	0	0	0	0	0	0	0	0	0	0	0	0	0	0	0	0	0	0	0	0	0	0	0	0	0
0	0	0	0	0	0	0	0	0	0	0	1	0	0	0	0	0	0	0	0	0	0	0	0	0	0	0	0	0	0
0	0	0	0	0	0	0	0	0	0	0	1	0	0	0	0	0	0	0	0	0	0	0	0	0	0	0	0	0	0
0	0	0	0	0	0	0	0	0	0	0	0	0	0	0	0	0	0	0	0	0	0	0	0	0	0	0	0	0	0
0	0	0	0	0	0	0	0	0	0	0	0	0	0	0	0	0	0	0	0	0	0	0	0	0	0	0	0	0	0
0	0	0	0	0	0	0	0	0	0	0	0	0	0	0	0	0	0	0	0	0	0	0	0	0	0	0	0	0	0
0	0	0	0	0	0	0	0	0	0	0	0	0	0	0	0	0	0	0	0	0	0	0	0	0	0	0	0	0	0
0	0	0	0	0	0	0	0	0	0	0	0	0	0	0	0	0	0	0	0	0	0	0	0	0	0	0	0	0	0
0	0	0	0	0	0	0	0	0	0	0	0	0	0	0	0	0	0	0	0	0	0	0	0	0	0	0	0	0	0
0	0	0	0	0	0	0	0	0	0	0	0	0	0	0	0	0	0	0	0	0	0	0	0	0	0	0	0	0	0
0	0	0	0	0	0	0	0	0	0	0	0	0	0	0	0	0	0	0	0	0	0	0	0	0	0	0	0	0	0
0	0	0	0	0	0	0	0	0	0	0	0	0	0	0	0	0	0	0	0	0	0	0	0	0	0	0	0	0	0
0	0	0	0	0	0	0	0	0	0	0	0	0	0	0	0	0	0	0	0	0	0	0	0	0	0	0	0	0	0
0	0	0	0	0	0	0	0	0	0	0	0	0	0	0	0	0	0	0	0	0	0	0	0	0	0	0	0	0	0
0	0	0	0	0	0	0	0	0	0	0	0	0	0	0	0	0	0	0	0	0	0	0	0	0	0	0	0	0	0
0	0	0	0	0	0	0	0	0	0	0	0	0	0	0	0	0	0	0	0	0	0	0	0	0	0	0	0	0	0
0	0	0	0	0	0	0	0	0	0	0	0	0	0	0	0	0	0	0	0	0	0	0	0	0	0	0	0	0	0
0	0	0	0	0	0	0	0	0	0	0	0	0	0	0	0	0	0	0	0	0	0	0	0	0	0	0	0	0	0
0	0	0	0	0	0	0	0	0	0	0	0	0	0	0	0	0	0	0	0	0	0	0	0	0	0	0	0	0	0
0	0	0	0	0	0	0	0	0	0	0	0	0	0	0	0	0	0	0	0	0	0	0	0	0	0	0	0	0	0
0	0	0	0	0	0	0	0	0	0	0	0	0	0	0	0	0	0	0	0	0	0	0	0	0	0	0	0	0	0
0	0	0	0	0	0	0	0	0	0	0	0	0	0	0	0	0	0	0	0	0	0	0	0	0	0	0	0	0	0
0	0	0	0	0	0	0	0	0	0	0	0	0	0	0	0	0	0	0	0	0	0	0	0	0	0	0	0	0	0
0	0	0	0	0	0	0	0	0	0	0	0	0	0	0	0	0	0	0	0	0	0	0	0	0	0	0	0	0	0
0	0	0	0	0	0	0	0	0	0	0	0	0	0	0	0	0	0	0	0	0	0	0	0	0	0	0	0	0	0
0	0	0	0	0	0	0	0	0	0	0	0	0	0	0	0	0	0	0	0	0	0	0	0	0	0	0	0	0	0
0	0	0	0	0	0	0	0	0	0	0	0	0	0	0	0	0	0	0	0	0	0	0	0	0	0	0	0	0	0
0	0	0	0	0	0	0	0	0	0	0	0	0	0	0	0	0	0	0	0	0	0	0	0	0	0	0	0	0	0
0	0	0	0	0	0	0	0	0	0	0	0	0	0	0	0	0	0	0	0	0	0	0	0	0	0	0	0	0	0
0	0	0	0	0	0	0	0	0	0	0	0	0	0	0	0	0	0	0	0	0	0	0	0	0	0	0	0	0	0
0	0	0	0	0	0	0	0	0	0	0	0	0	0	0	0	0	0	0	0	0	0	0	0	0	0	0	0	0	0
0	0	0	0	0	0	0	0	0	0	0	0	0	0	0	0	0	0	0	0	0	0	0	0	0	0	0	0	0	0
0	0	0	0	0	0	0	0	0	0	0	0	0	0	0	0	0	0	0	0	0	0	0	0	0	0	0	0	0	0
0	0	0	0	0	0	0	0	0	0	0	0	0	0	0	0	0	0	0	0	0	0	0	0	0	0	0	0	0	0
0	0	0	0	0	0	0	0	0	0	0	0	0	0	0	0	0	0	0	0	0	0	0	0	0	0	0	0	0	0
0	0	0	0	0	0	0	0	0	0	0	0	0	0	0	0	0	0	0	0	0	0	0	0	0	0	0	0	0	0
0	0	0	0	0	0	0	0	0	0	0	0	0	0	0	0	0	0	0	0	0	0	0	0	0	0	0	0	0	0
0	0	0	0	0	0	0	0	0	0	0	0	0	0	0	0	0	0	0	0	0	0	0	0	0	0	0	0	0	0
0	0	0	0	0	0	0	0	0	0	0	0	0	0	0	0	0	0	0	0	0	0	0	0	0	0	0	0	0	0
0	0	0	0	0	0	0	0	0	0	0	0	0	0	0	0	0	0	0	0	0	0	0	0	0	0	0	0	0	0
0	0	0	0	0	0	0	0	0	0	0	0	0	0	0	0	0	0	0	0	0	0	0	0	0	0	0	0	0	0
0	0	0	0	0	0	0	0	0	0	0	0	0	0	0	0	0	0	0	0	0	0	0	0	0	0	0	0	0	0
0	0	0	0	0	0	0	0	0	0	0	0	0	0	0	0	0	0	0	0	0	0	0	0	0	0	0	0	0	0
0	0	0	0	0	0	0	0	0	0	0	0	0	0	0	0	0	0	0	0	0	0	0	0	0	0	0	0	0	0
0	0	0	0	0	0	0	0	0	0	0	0	0	0	0	0	0	0	0	0	0	0	0	0	0	0	0	0	0	0
0	0	0	0	0	0	0	0	0	0	0	0	0	0	0	0	0	0	0	0	0	0	0	0	0	0	0	0	0	0
0	0	0	0	0	0	0	0	0	0	0	0	0	0	0	0	0	0	0	0	0	0	0	0	0	0	0	0	0	0
0	0	0	0	0	0	0	0	0	0	0	0	0	0	0	0	0	0	0	0	0	0	0	0	0	0	0	0	0	0
0	0	0	0	0	0	0	0	0	0	0	0	0	0	0	0	0	0	0	0	0	0	0	0	0	0	0	0	0	0
0	0	0	0	0	0	0	0	0	0	0	0	0	0	0	0	0	0	0	0	0	0	0	0	0	0	0	0	0	0
0	0	0	0	0	0	0	0	0	0	0	0	0	0	0	0	0	0	0	0	0	0	0	0	0	0	0	0	0	0
0	0	0	0	0	0	0	0	0	0	0	0	0	0	0	0	0	0	0	0	0	0	0	0	0	0	0	0	0	0
0	0	0	0	0	0	0	0	0	0	0	0	0	0	0	0	0	0	0	0	0	0	0	0	0	0	0	0	0	0
0	0	0	0	0	0	0	0	0	0	0	0	0	0	0	0	0	0	0	0	0	0	0	0	0	0	0	0	0	0
0	0	0	0	0	0	0	0	0	0	0	0	0	0	0	0	0	0	0	0	0	0	0	0	0	0	0	0	0	0
0	0	0	0	0	0	0	0	0	0	0	0	0	0	0	0	0	0	0	0	0	0	0	0	0	0	0	0	0	0
0	0	0	0	0	0	0	0	0	0	0	0	0	0	0	0	0	0	0	0	0	0	0	0	0	0	0	0	0	0
0	0	0	0	0	0	0	0	0	0	0	0	0	0	0	0	0	0	0	0	0	0	0	0	0	0	0	0	0	0
0	0	0	0	0	0	0	0	0	0	0	0	0	0	0	0	0	0	0	0	0	0	0	0	0	0	0	0	0	0
0	0	0	0	0	0	0	0	0	0	0	0	0	0	0	0	0	0	0	0	0	0	0	0	0	0	0	0	0	0
0	0	0	0	0	0	0	0	0	0	0	0	0	0	0	0	0	0	0	0	0	0	0	0	0	0	0	0	0	0
0	0	0	0	0	0	0	0	0	0	0	0	0	0	0	0	0	0	0	0	0	0	0	0	0	0	0	0	0	0
0	0	0	0	0	0	0	0	0	0	0	0	0	0	0	0	0	0	0	0	0	0	0	0	0	0	0	0	0	0
0	0	0	0	0	0	0	0	0	0	0	0	0	0	0	0	0	0	0	0	0	0	0	0	0	0	0	0	0	0
0	0	0	0	0	0	0	0	0	0	0	0	0	0	0	0	0	0	0	0	0	0	0	0	0	0	0	0	0	0
0	0	0	0	0	0	0	0	0	0	0	0	0	0	0	0	0	0	0	0	0	0	0	0	0	0	0	0	0	0
0	0	0	0	0	0	0	0	0	0	0	0	0	0	0	0	0	0	0	0	0	0	0	0	0	0	0	0	0	0
0	0	0	0	0	0	0	0	0	0	0	0	0	0	0	0	0	0	0	0	0	0	0	0	0	0	0	0	0	0
0	0	0	0	0	0	0	0	0	0	0	0	0	0	0	0	0	0	0	0	0	0	0	0	0	0	0	0	0	0
0	0	0	0	0	0	0	0	0	0	0	0	0	0	0	0	0	0	0	0	0	0	0	0	0	0	0	0	0	0
0	0	0	0	0	0	0	0	0	0	0	0	0	0	0	0	0	0	0	0	0	0	0	0	0	0	0	0	0	0
0	0	0	0	0	0	0	0	0	0	0	0	0	0	0	0	0	0	0	0	0	0	0	0	0	0	0	0	0	0
0	0	0	0	0	0	0	0	0	0	0	0	0	0	0	0	0	0	0	0	0	0	0	0	0	0	0	0	0	0
0	0	0	0	0	0	0	0	0	0	0	0	0	0	0	0	0	0	0	0	0	0	0	0	0	0	0	0	0	0
0	0	0	0	0	0	0	0	0	0	0	0	0	0	0	0	0	0	0	0	0	0	0	0	0	0	0	0	0	0
0	0	0	0	0	0	0	0	0	0	0	0	0	0	0	0	0	0	0	0	0	0	0	0	0	0	0	0	0	0
0	0	0	0	0	0	0	0	0	0	0	0	0	0	0	0	0	0	0	0	0	0	0	0	0	0	0	0	0	0
0	0	0	0	0	0	0	0	0	0	0	0	0	0	0	0	0	0	0	0	0	0	0	0	0	0	0	0	0	0
0	0	0	0	0	0	0	0	0	0	0	0	0	0	0	0	0	0	0	0	0	0	0	0	0	0	0	0	0	0
0	0	0	0	0	0	0	0	0	0	0	0	0	0	0	0	0	0	0	0	0	0	0	0	0	0	0	0	0	0
0	0	0	0	0	0	0	0	0	0	0	0	0	0	0	0	0	0	0	0	0	0	0	0	0	0	0	0	0	0
0	0	0	0	0	0	0	0	0	0	0	0	0	0	0	0	0	0	0	0	0	0	0	0	0	0	0	0	0	0
0	0	0	0	0	0	0	0	0	0	0	0	0	0	0	0	0	0	0	0	0	0	0	0	0	0	0	0	0	0
0	0	0	0	0	0	0	0	0	0	0	0	0	0	0	0	0	0	0	0	0	0	0	0	0	0	0	0	0	0
0	0	0	0	0	0	0	0	0	0	0	0	0	0	0	0	0	0	0	0	0	0	0	0	0	0	0	0	0	0
0	0	0	0	0	0	0	0	0	0	0	0	0	0	0	0	0	0	0	0	0	0	0	0	0	0	0	0	0	0
0	0	0	0	0	0	0	0	0	0	0	0	0	0	0	0	0	0	0	0	0	0	0	0	0	0	0	0	0	0
0	0	0	0	0	0	0	0	0	0	0	0	0	0	0	0	0	0	0	0	0	0	0	0	0	0	0	0	0	0
0	0	0	0	0	0	0	0	0	0	0	0	0	0	0	0	0	0	0	0	0	0	0	0	0	0	0	0	0	0
0	0	0	0	0	0	0	0	0	0	0	0	0	0	0	0	0	0	0	0	0	0	0	0	0	0	0	0	0	0
0	0	0	0	0	0	0	0	0	0	0	0	0	0	0	0	0	0	0	0	0	0	0	0	0	0	0	0	0	0
0	0	0	0	0	0	0	0	0	0	0	0	0	0	0	0	0	0	0	0	0	0	0	0	0	0	0	0	0	0
0	0	0	0	0	0	0	0	0	0	0	0	0	0	0	0	0	0	0	0	0	0	0	0	0	0	0	0	0	0
0	0	0	0	0	0	0	0	0	0	0	0	0	0	0	0	0	0	0	0	0	0	0	0	0	0	0	0	0	0
0	0	0	0	0	0	0	0	0	0	0	0	0	0	0	0	0	0	0	0	0	0	0	0	0	0	0	0	0	0
0	0	0	0	0	0	0	0	0	0	0	0	0	0	0	0	0	0	0	0	0	0	0	0	0	0	0	0	0	0
0	0	0	0	0	0	0	0	0	0	0	0	0	0	0	0	0	0	0	0	0	0	0	0	0	0	0	0	0	0
0	0	0	0	0	0	0	0	0	0	0	0	0	0	0	0	0	0	0	0	0	0	0	0	0	0	0	0	0	0
0	0	0	0	0	0	0	0	0	0	0	0	0	0	0	0	0	0	0	0	0	0	0	0	0	0	0	0	0	0
0	0	0	0	0	0	0	0	0	0	0	0	0	0	0	0	0	0	0	0	0	0	0	0	0	0	0	0	0	0
0	0	0	0	0	0	0	0	0	0	0	0	0	0	0	0	0	0	0	0	0	0	0	0	0	0	0	0	0	0
0	0	0	0	0	0	0	0	0	0	0	0	0	0	0	0	0	0	0	0	0	0	0	0	0	0	0	0	0	0
0	0	0	0	0	0	0	0	0	0	0	0	0	0	0	0	0	0	0	0	0	0	0	0	0	0	0	0	0	0
0	0	0	0	0	0	0	0	0	0	0	0	0	0	0	0	0	0	0	0	0	0	0	0	0	0	0	0	0	0
0	0	0	0	0	0	0	0	0	0	0	0	0	0	0	0	0	0	0	0	0	0	0	0	0	0	0	0	0	0
0	0	0	0	0	0	0	0	0	0	0	0	0	0	0	0	0	0	0	0	0	0	0	0	0	0	0	0	0	0
0	0	0	0	0	0	0	0	0	0	0	0	0	0	0	0	0	0	0	0	0	0	0	0	0	0	0	0	0	0
0	0	0	0	0	0	0	0	0	0	0	0	0	0	0	0	0	0	0	0	0	0	0	0	0	0	0	0	0	0
0	0	0	0	0	0	0	0	0	0	0	0	0	0	0	0	0	0	0	0	0	0	0	0	0	0	0	0	0	0
0	0	0	0	0	0	0	0	0	0	0	0	0	0	0	0	0	0	0	0	0	0	0	0	0	0	0	0	0	0
0	0	0	0	0	0	0	0	0	0	0	0	0	0	0	0	0	0	0	0	0	0	0	0	0	0	0	0	0	0
0	0	0	0	0	0	0	0	0	0	0	0	0	0	0	0	0	0	0	0	0	0	0	0	0	0	0	0	0	0
0	0	0	0	0	0	0	0	0	0	0	0	0	0	0	0	0	0	0	0	0	0	0	0	0	0	0	0	0	0
0	0	0	0	0	0	0	0	0	0	0	0	0	0	0	0	0	0	0	0	0	0	0	0	0	0	0	0	0	0
0	0	0	0	0	0	0	0	0	0	0	0	0	0	0	0	0	0	0	0	0	0	0	0	0	0	0	0	0	0
0	0	0	0	0	0	0	0	0	0	0	0	0	0	0	0	0	0	0	0	0	0	0	0	0	0	0	0	0	0
0	0	0	0	0	0	0	0	0	0	0	0	0	0	0	0	0	1	0	0	0	0	0	0	0	0	0	0	0	0
0	0	0	0	0	0	0	0	0	0	0	0	0	0	0	0	0	1	0	0	0	0	0	0	0	0	0	0	0	0
0	0	0	0	0	0	0	0	0	0	0	0	0	0	0	0	0	0	0	0	0	0	0	0	0	0	0	0	0	0
0	0	0	0	0	0	0	0	0	0	0	0	0	0	0	0	0	0	0	0	0	0	0	0	0	0	0	0	0	0
0	0	0	0	0	0	0	0	0	0	0	0	0	0	0	0	0	0	0	0	0	0	0	0	0	0	0	0	0	0
0	0	0	0	0	0	0	0	0	0	0	0	0	0	0	0	0	0	0	0	0	0	0	0	0	0	0	0	0	0
0	0	0	0	0	0	0	0	0	0	0	0	0	0	0	0	0	0	0	0	0	0	0	0	0	0	0	0	0	0
0	0	0	0	0	0	0	0	0	0	0	0	0	0	0	0	0	0	0	0	0	0	0	0	0	0	0	0	0	0
0	0	0	0	0	0	0	0	0	0	0	0	0	0	0	0	0	0	0	0	0	0	0	0	0	0	0	0	0	0
0	0	0	0	0	0	0	0	0	0	0	0	0	0	0	0	0	0	0	0	0	0	0	0	0	0	0	0	0	0
0	0	0	0	0	0	0	0	0	0	0	0	0	0	0	0	0	0	0	0	0	0	0	0	0	0	0	0	0	0
0	0	0	0	0	0	0	0	0	0	0	0	0	0	0	0	0	0	0	0	0	0	0	0	0	0	0	0	0	0
0	0	0	0	0	0	0	0	0	0	0	0	0	0	0	0	0	0	0	0	0	0	0	0	0	0	0	0	0	0
0	0	0	0	0	0	0	0	0	0	0	0	0	0	0	0	0	0	0	0	0	0	0	0	0	0	0	0	0	0
0	0	0	0	0	0	0	0	0	0	0	0	0	0	0	0	0	0	0	0	0	0	0	0	0	0	0	0	0	0
0	0	0	0	0	0	0	0	0	0	0	0	0	0	0	0	0	0	0	0	0	0	0	0	0	0	0	0	0	0
0	0	0	0	0	0	0	0	0	0	0	0	0	0	0	0	0	0	0	0	0	0	0	0	0	0	0	0	0	0
0	0	0	0	0	0	0	0	0	0	0	0	0	0	0	0	0	0	0	0	0	0	0	0	0	0	0	0	0	0
0	0	0	0	0	0	0	0	0	0	0	0	0	0	0	0	0	0	0	0	0	0	0	0	0	0	0	0	0	0
0	0	0	0	0	0	0	0	0	0	0	0	0	0	0	0	0	0	0	0	0	0	0	0	0	0	0	0	0	0
0	0	0	0	0	0	0	0	0	0	0	0	0	0	0	0	0	0	0	0	0	0	0	0	0	0	0	0	0	0
0	0	0	0	0	0	0	0	0	0	0	0	0	0	0	0	0	0	0	0	0	0	0	0	0	0	0	0	0	0
0	0	0	0	0	0	0	0	0	0	0	0	0	0	0	0	0	0	0	0	0	0	0	0	0	0	0	0	0	0
0	0	0	0	0	0	0	0	0	0	0	0	0	0	0	0	0	0	0	0	0	0	0	0	0	0	0	0	0	0
0	0	0	0	0	0	0	0	0	0	0	0	0	0	0	0	0	0	0	0	0	0	0	0	0	0	0	0	0	0
0	0	0	0	0	0	0	0	0	0	0	0	0	0	0	0	0	0	0	0	0	0	0	0	0	0	0	0	0	0
0	0	0	0	0	0	0	0	0	0	0	0	0	0	0	0	0	0	0	0	0	0	0	0	0	0	0	0	0	0
0	0	0	0	0	0	0	0	0	0	0	0	0	0	0	0	0	0	0	0	0	0	0	0	0	0	0	0	0	0
0	0	0	0	0	0	0	0	0	0	0	0	0	0	0	0	0	0	0	0	0	0	0	0	0	0	0	0	0	0
0	0	0	0	0	0	0	0	0	0	0	0	0	0	0	0	0	0	0	0	0	0	0	0	0	0	0	0	0	0
0	0	0	0	0	0	0	0	0	0	0	0	0	0	0	0	0	0	0	0	0	0	0	0	0	0	0	0	0	0
0	0	0	0	0	0	0	0	0	0	0	0	0	0	0	0	0	0	0	0	0	0	0	0	0	0	0	0	0	0
0	0	0	0	0	0	0	0	0	0	0	0	0	0	0	0	0	0	0	0	0	0	0	0	0	0	0	0	0	0
0	0	0	0	0	0	0	0	0	0	0	0	0	0	0	0	0	0	0	0	0	0	0	0	0	0	0	0	0	0
0	0	0	0	0	0	0	0	0	0	0	0	0	0	0	0	0	0	0	0	0	0	0	0	0	0	0	0	0	0
0	0	0	0	0	0	0	0	0	0	0	0	0	0	0	0	0	0	0	0	0	0	0	0	0	0	0	0	0	0
0	0	0	0	0	0	0	0	0	0	0	0	0	0	0	0	0	0	0	0	0	0	0	0	0	0	0	0	0	0
0	0	0	0	0	0	0	0	0	0	0	0	0	0	0	0	0	0	0	0	0	0	0	0	0	0	0	0	0	0
0	0	0	0	0	0	0	0	0	0	0	0	0	0	0	0	0	0	0	0	0	0	0	0	0	0	0	0	0	0
0	0	0	0	0	0	0	0	0	0	0	0	0	0	0	0	0	0	0	0	0	0	0	0	0	0	0	0	0	0
0	0	0	0	0	0	0	0	0	0	0	0	0	0	0	0	0	0	0	0	0	0	0	0	0	0	0	0	0	0
0	0	0	0	0	0	0	0	0	0	0	0	0	0	0	0	0	0	0	0	0	0	0	0	0	0	0	0	0	0
0	0	0	0	0	0	0	0	0	0	0	0	0	0	0	0	0	0	0	0	0	0	0	0	0	0	0	0	0	0
0	0	0	0	0	0	0	0	0	0	0	0	0	0	0	0	0	0	0	0	0	0	0	0	0	0	0	0	0	0
0	0	0	0	0	0	0	0	0	0	0	0	0	0	0	0	0	0	0	0	0	0	0	0	0	0	0	0	0	0
0	0	0	0	0	0	0	0	0	0	0	0	0	0	0	0	0	0	0	0	0	0	0	0	0	0	0	0	0	0
0	0	0	0	0	0	0	0	0	0	0	0	0	0	0	0	0	0	0	0	0	0	0	0	0	0	0	0	0	0
0	0	0	0	0	0	0	0	0	0	0	0	0	0	0	0	0	0	0	0	0	0	0	0	0	0	0	0	0	0
0	0	0	0	0	0	0	0	0	0	0	0	0	0	0	0	0	0	0	0	0	0	0	0	0	0	0	0	0	0
0	0	0	0	0	0	0	0	0	0	0	0	0	0	0	0	0	0	0	0	0	0	0	0	0	0	0	0	0	0
0	0	0	0	0	0	0	0	0	0	0	0	0	0	0	0	0	0	0	0	0	0	0	0	0	0	0	0	0	0
0	0	0	0	0	0	0	0	0	0	0	0	0	0	0	0	0	0	0	0	0	0	0	0	0	0	0	0	0	0
0	0	0	0	0	0	0	0	0	0	0	0	0	0	0	0	0	0	0	0	0	0	0	0	0	0	0	0	0	0
0	0	0	0	0	0	0	0	0	0	0	0	0	0	0	0	0	0	0	0	0	0	0	0	0	0	0	0	0	0
0	0	0	0	0	0	0	0	0	0	0	0	0	0	0	0	0	0	0	0	0	0	0	0	0	0	0	0	0	0
0	0	0	0	0	0	0	0	0	0	0	0	0	0	0	0	0	0	0	0	0	0	0	0	0	0	0	0	0	0
0	0	0	0	0	0	0	0	0	0	0	0	0	0	0	0	0	0	0	0	0	0	0	0	0	0	0	0	0	0
0	0	0	0	0	0	0	0	0	0	0	0	0	0	0	0	0	0	0	0	0	0	0	0	0	0	0	0	0	0
0	0	0	0	0	0	0	0	0	0	0	0	0	0	0	0	0	0	0	0	0	0	0	0	0	0	0	0	0	0
0	0	0	0	0	0	0	0	0	0	0	0	0	0	0	0	0	0	0	0	0	0	0	0	0	0	0	0	0	0
0	0	0	0	0	0	0	0	0	0	0	0	0	0	0	0	0	0	0	0	0	0	0	0	0	0	0	0	0	0
0	0	0	0	0	0	0	0	0	0	0	0	0	0	0	0	0	0	0	0	0	0	0	0	0	0	0	0	0	0
0	0	0	0	0	0	0	0	0	0	0	0	0	0	0	0	0	0	0	0	0	0	0	0	0	0	0	0	0	0
0	0	0	0	0	0	0	0	0	0	0	0	0	0	0	0	0	0	0	0	0	0	0	0	0	0	0	0	0	0
0	0	0	0	0	0	0	0	0	0	0	0	0	0	0	0	0	0	0	0	0	0	0	0	0	0	0	0	0	0
0	0	0	0	0	0	0	0	0	0	0	0	0	0	0	0	0	0	0	0	0	0	0	0	0	0	0	0	0	0
0	0	0	0	0	0	0	0	0	0	0	0	0	0	0	0	0	0	0	0	0	0	0	0	0	0	0	0	0	0
0	0	0	0	0	0	0	0	0	0	0	0	0	0	0	0	0	0	0	0	0	0	0	0	0	0	0	0	0	0
0	0	0	0	0	0	0	0	0	0	0	0	0	0	0	0	0	0	0	0	0	0	0	0	0	0	0	0	0	0
0	0	0	0	0	0	0	0	0	0	0	0	0	0	0	0	0	0	0	0	0	0	0	0	0	0	0	0	0	0
0	0	0	0	0	0	0	0	0	0	0	0	0	0	0	0	0	0	0	0	0	0	0	0	0	0	0	0	0	0
0	0	0	0	0	0	0	0	0	0	0	0	0	0	0	0	0	0	0	0	0	0	0	0	0	0	0	0	0	0
0	0	0	0	0	0	0	0	0	0	0	0	0	0	0	0	0	0	0	0	0	0	0	0	0	0	0	0	0	0
0	0	0	0	0	0	0	0	0	0	0	0	0	0	0	0	0	0	0	0	0	0	0	0	0	0	0	0	0	0
0	0	0	0	0	0	0	0	0	0	0	0	0	0	0	0	0	0	0	0	0	0	0	0	0	0	0	0	0	0
0	0	0	0	0	0	0	0	0	0	0	0	0	0	0	0	0	0	0	0	0	0	0	0	0	0	0	0	0	0
0	0	0	0	0	0	0	0	0	0	0	0	0	0	0	0	0	0	0	0	0	0	0	0	0	0	0	0	0	0
0	0	0	0	0	0	0	0	0	0	0	0	0	0	0	0	0	0	0	0	0	0	0	0	0	0	0	0	0	0
0	0	0	0	0	0	0	0	0	0	0	0	0	0	0	0	0	0	0	0	0	0	0	0	0	0	0	0	0	0
0	0	0	0	0	0	0	0	0	0	0	0	0	0	0	0	0	0	0	0	0	0	0	0	0	0	0	0	0	0
0	0	0	0	0	0	0	0	0	0	0	0	0	0	0	0	0	0	0	0	0	0	0	0	0	0	0	0	0	0
0	0	0	0	0	0	0	0	0	0	0	0	0	0	0	0	0	0	0	0	0	0	0	0	0	0	0	0	0	0
0	0	0	0	0	0	0	0	0	0	0	0	0	0	0	0	0	0	0	0	0	0	0	0	0	0	0	0	0	0
0	0	0	0	0	0	0	0	0	0	0	0	0	0	0	0	0	0	0	0	0	0	0	0	0	0	0	0	0	0
0	0	0	0	0	0	0	0	0	0	0	0	0	0	0	0	0	0	0	0	0	0	0	0	0	0	0	0	0	0
0	0	0	0	0	0	0	0	0	0	0	0	0	0	0	0	0	0	0	0	0	0	0	0	0	0	0	0	0	0
0	0	0	0	0	0	0	0	0	0	0	0	0	0	0	0	0	0	0	0	0	0	0	0	0	0	0	0	0	0
0	0	0	0	0	0	0	0	0	0	0	0	0	0	0	0	0	0	0	0	0	0	0	0	0	0	0	0	0	0
0	0	0	0	0	0	0	0	0	0	0	0	0	0	0	0	0	0	0	0	0	0	0	0	0	0	0	0	0	0
0	0	0	0	0	0	0	0	0	0	0	0	0	0	0	0	0	0	0	0	0	0	0	0	0	0	0	0	0	0
0	0	0	0	0	0	0	0	0	0	0	0	0	0	0	0	0	0	0	0	0	0	0	0	0	0	0	0	0	0
0	0	0	0	0	0	0	0	0	0	0	0	0	0	0	0	0	0	0	0	0	0	0	0	0	0	0	0	0	0
0	0	0	0	0	0	0	0	0	0	0	0	0	0	0	0	0	0	0	0	0	0	0	0	0	0	0	0	0	0
0	0	0	0	0	0	0	0	0	0	0	0	0	0	0	0	0	0	0	0	0	0	0	0	0	0	0	0	0	0
0	0	0	0	0	0	0	0	0	0	0	0	0	0	0	0	0	0	0	0	0	0	0	0	0	0	0	0	0	0
0	0	0	0	0	0	0	0	0	0	0	0	0	0	0	0	0	0	0	0	0	0	0	0	0	0	0	0	0	0
0	0	0	0	0	0	0	0	0	0	0	0	0	0	0	0	0	0	0	0	0	0	0	0	0	0	0	0	0	0
0	0	0	0	0	0	0	0	0	0	0	0	0	0	0	0	0	0	0	0	0	0	0	0	0	0	0	0	0	0
0	0	0	0	0	0	0	0	0	0	0	0	0	0	0	0	0	0	0	0	0	0	0	0	0	0	0	0	0	0
0	0	0	0	0	0	0	0	0	0	0	0	0	0	0	0	0	0	0	0	0	0	0	0	0	0	0	0	0	0
0	0	0	0	0	0	0	0	0	0	0	0	0	0	0	0	0	0	0	0	0	0	0	0	0	0	0	0	0	0
0	0	0	0	0	0	0	0	0	0	0	0	0	0	0	0	0	0	0	0	0	0	0	0	0	0	0	0	0	0
0	0	0	0	0	0	0	0	0	0	0	0	0	0	0	0	0	0	0	0	0	0	0	0	0	0	0	0	0	0
0	0	0	0	0	0	0	0	0	0	0	0	0	0	0	0	0	0	0	0	0	0	0	0	0	0	0	0	0	0
0	0	0	0	0	0	0	0	0	0	0	0	0	0	0	0	0	0	0	0	0	0	0	0	0	0	0	0	0	0
0	0	0	0	0	0	0	0	0	0	0	0	0	0	0	0	0	0	0	0	0	0	0	0	0	0	0	0	0	0
0	0	0	0	0	0	0	0	0	0	0	0	0	0	0	0	0	0	0	0	0	0	0	0	0	0	0	0	0	0
0	0	0	0	0	0	0	0	0	0	0	0	0	0	0	0	0	0	0	0	0	0	0	0	0	0	0	0	0	0
0	0	0	0	0	0	0	0	0	0	0	0	0	0	0	0	0	0	0	0	0	0	0	0	0	0	0	0	0	0
0	0	0	0	0	0	0	0	0	0	0	0	0	0	0	0	0	0	0	0	0	0	0	0	0	0	0	0	0	0
0	0	0	0	0	0	0	0	0	0	0	0	0	0	0	0	0	0	0	0	0	0	0	0	0	0	0	0	0	0
0	0	0	0	0	0	0	0	0	0	0	0	0	0	0	0	0	0	0	0	0	0	0	0	0	0	0	0	0	0
0	0	0	0	0	0	0	0	0	0	0	0	0	0	0	0	0	0	0	0	0	0	0	0	0	0	0	0	0	0
0	0	0	0	0	0	0	0	0	0	0	0	0	0	0	0	0	0	0	0	0	0	0	0	0	0	0	0	0	0
0	0	0	0	0	0	0	0	0	0	0	0	0	0	0	0	0	0	0	0	0	0	0	0	0	0	0	0	0	0
0	0	0	0	0	0	0	0	0	0	0	0	0	0	0	0	0	0	0	0	0	0	0	0	0	0	0	0	0	0
0	0	0	0	0	0	0	0	0	0	0	0	0	0	0	0	0	0	0	0	0	0	0	0	0	0	0	0	0	0
0	0	0	0	0	0	0	0	0	0	0	0	0	0	0	0	0	0	0	0	0	0	0	0	0	0	0	0	0	0
0	0	0	0	0	0	0	0	0	0	0	0	0	0	0	0	0	0	0	0	0	0	0	0	0	0	0	0	0	0
0	0	0	0	0	0	0	0	0	0	0	0	0	0	0	0	0	0	0	0	0	0	0	0	0	0	0	0	0	0
0	0	0	0	0	0	0	0	0	0	0	0	0	0	0	0	0	0	0	0	0	0	0	0	0	0	0	0	0	0
0	0	0	0	0	0	0	0	0	0	0	0	0	0	0	0	0	0	0	0	0	0	0	0	0	0	0	0	0	0
0	0	0	0	0	0	0	0	0	0	0	0	0	0	0	0	0	0	0	0	0	0	0	0	0	0	0	0	0	0
0	0	0	0	0	0	0	0	0	0	0	0	0	0	0	0	0	0	0	0	0	0	0	0	0	0	0	0	0	0
0	0	0	0	0	0	0	0	0	0	0	0	0	0	0	0	0	0	0	0	0	0	0	0	0	0	0	0	0	0
0	0	0	0	0	0	0	0	0	0	0	0	0	0	0	0	0	0	0	0	0	0	0	0	0	0	0	0	0	0
0	0	0	0	0	0	0	0	0	0	0	0	0	0	0	0	0	0	0	0	0	0	0	0	0	0	0	0	0	0
0	0	0	0	0	0	0	0	0	0	0	0	0	0	0	0	0	0	0	0	0	0	0	0	0	0	0	0	0	0
0	0	0	0	0	0	0	0	0	0	0	0	0	0	0	0	0	0	0	0	0	0	0	0	0	0	0	0	0	0
0	0	0	0	0	0	0	0	0	0	0	0	0	0	0	0	0	0	0	0	0	0	0	0	0	0	0	0	0	0
0	0	0	0	0	0	0	0	0	0	0	0	0	0	0	0	0	0	0	0	0	0	0	0	0	0	0	0	0	0
0	0	0	0	0	0	0	0	0	0	0	0	0	0	0	0	0	0	0	0	0	0	0	0	0	0	0	0	0	0
0	0	0	0	0	0	0	0	0	0	0	0	0	0	0	0	0	0	0	0	0	0	0	0	0	0	0	0	0	0
0	0	0	0	0	0	0	0	0	0	0	0	0	0	0	0	0	0	0	0	0	0	0	0	0	0	0	0	0	0
0	0	0	0	0	0	0	0	0	0	0	0	0	0	0	0	0	0	0	0	0	0	0	0	0	0	0	0	0	0
0	0	0	0	0	0	0	0	0	0	0	0	0	0	0	0	0	0	0	0	0	0	0	0	0	0	0	0	0	0
0	0	0	0	0	0	0	0	0	0	0	0	0	0	0	0	0	0	0	0	0	0	0	0	0	0	0	0	0	0
0	0	0	0	0	0	0	0	0	0	0	0	0	0	0	0	0	0	0	0	0	0	0	0	0	0	0	0	0	0
0	0	0	0	0	0	0	0	0	0	0	0	0	0	0	0	0	0	0	0	0	0	0	0	0	0	0	0	0	0
0	0	0	0	0	0	0	0	0	0	0	0	0	0	0	0	0	0	0	0	0	0	0	0	0	0	0	0	0	0
0	0	0	0	0	0	0	0	0	0	0	0	0	0	0	0	0	0	0	0	0	0	0	0	0	0	0	0	0	0
0	0	0	0	0	0	0	0	0	0	0	0	0	0	0	0	0	0	0	0	0	0	0	0	0	0	0	0	0	0
0	0	0	0	0	0	0	0	0	0	0	0	0	0	0	0	0	0	0	0	0	0	0	0	0	0	0	0	0	0
0	0	0	0	0	0	0	0	0	0	0	0	0	0	0	0	0	0	0	0	0	0	0	0	0	0	0	0	0	0
0	0	0	0	0	0	0	0	0	0	0	0	0	0	0	0	0	0	0	0	0	0	0	0	0	0	0	0	0	0
0	0	0	0	0	0	0	0	0	0	0	0	0	0	0	0	0	0	0	0	0	0	0	0	0	0	0	0	0	0
0	0	0	0	0	0	0	0	0	0	0	0	0	0	0	0	0	0	0	0	0	0	0	0	0	0	0	0	0	0
0	0	0	0	0	0	0	0	0	0	0	0	0	0	0	0	0	0	0	0	0	0	0	0	0	0	0	0	0	0
0	0	0	0	0	0	0	0	0	0	0	0	0	0	0	0	0	0	0	0	0	0	0	0	0	0	0	0	0	0
0	0	0	0	0	0	0	0	0	0	0	0	0	0	0	0	0	0	0	0	0	0	0	0	0	0	0	0	0	0
0	0	0	0	0	0	0	0	0	0	0	0	0	0	0	0	0	0	0	0	0	0	0	0	0	0	0	0	0	0
0	0	0	0	0	0	0	0	0	0	0	0	0	0	0	0	0	0	0	0	0	0	0	0	0	0	0	0	0	0
0	0	0	0	0	0	0	0	0	0	0	0	0	0	0	0	0	0	0	0	0	0	0	0	0	0	0	0	0	0
0	0	0	0	0	0	0	0	0	0	0	0	0	0	0	0	0	0	0	0	0	0	0	0	0	0	0	0	0	0
0	0	0	0	0	0	0	0	0	0	0	0	0	0	0	0	0	0	0	0	0	0	0	0	0	0	0	0	0	0
0	0	0	0	0	0	0	0	0	0	0	0	0	0	0	0	0	0	0	0	0	0	0	0	0	0	0	0	0	0
0	0	0	0	0	0	0	0	0	0	0	0	0	0	0	0	0	0	0	0	0	0	0	0	0	0	0	0	0	0
0	0	0	0	0	0	0	0	0	0	0	0	0	0	0	0	0	0	0	0	0	0	0	0	0	0	0	0	0	0
0	0	0	0	0	0	0	0	0	0	0	0	0	0	0	0	0	0	0	0	0	0	0	0	0	0	0	0	0	0
0	0	0	0	0	0	0	0	0	0	0	0	0	0	0	0	0	0	0	0	0	0	0	0	0	0	0	0	0	0
0	0	0	0	0	0	0	0	0	0	0	0	0	0	0	0	0	0	0	0	0	0	0	0	0	0	0	0	0	0
0	0	0	0	0	0	0	0	0	0	0	0	0	0	0	0	0	0	0	0	0	0	0	0	0	0	0	0	0	0
0	0	0	0	0	0	0	0	0	0	0	0	0	0	0	0	0	0	0	0	0	0	0	0	0	0	0	0	0	0
0	0	0	0	0	0	0	0	0	0	0	0	0	0	0	0	0	0	0	0	0	0	0	0	0	0	0	0	0	0
0	0	0	0	0	0	0	0	0	0	0	0	0	0	0	0	0	0	0	0	0	0	0	0	0	0	0	0	0	0
0	0	0	0	0	0	0	0	0	0	0	0	0	0	0	0	0	0	0	0	0	0	0	0	0	0	0	0	0	0
0	0	0	0	0	0	0	0	0	0	0	0	0	0	0	0	0	0	0	0	0	0	0	0	0	0	0	0	0	0
0	0	0	0	0	0	0	0	0	0	0	0	0	0	0	0	0	0	0	0	0	0	0	0	0	0	0	0	0	0
0	0	0	0	0	0	0	0	0	0	0	0	0	0	0	0	0	0	0	0	0	0	0	0	0	0	0	0	0	0
0	0	0	0	0	0	0	0	0	0	0	0	0	0	0	0	0	0	0	0	0	0	0	0	0	0	0	0	0	0
0	0	0	0	0	0	0	0	0	0	0	0	0	0	0	0	0	0	0	0	0	0	0	0	0	0	0	0	0	0
0	0	0	0	0	0	0	0	0	0	0	0	0	0	0	0	0	0	0	0	0	0	0	0	0	0	0	0	0	0
0	0	0	0	0	0	0	0	0	0	0	0	0	0	0	0	0	0	0	0	0	0	0	0	0	0	0	0	0	0
0	0	0	0	0	0	0	0	0	0	0	0	0	0	0	0	0	0	0	0	0	0	0	0	0	0	0	0	0	0
0	0	0	0	0	0	0	0	0	0	0	0	0	0	0	0	0	0	0	0	0	0	0	0	0	0	0	0	0	0
0	0	0	0	0	0	0	0	0	0	0	0	0	0	0	0	0	0	0	0	0	0	0	0	0	0	0	0	0	0
0	0	0	0	0	0	0	0	0	0	0	0	0	0	0	0	0	0	0	0	0	0	0	0	0	0	0	0	0	0
0	0	0	0	0	0	0	0	0	0	0	0	0	0	0	0	0	0	0	0	0	0	0	0	0	0	0	0	0	0
0	0	0	0	0	0	0	0	0	0	0	0	0	0	0	0	0	0	0	0	0	0	0	0	0	0	0	0	0	0
0	0	0	0	0	0	0	0	0	0	0	0	0	0	0	0	0	0	0	0	0	0	0	0	0	0	0	0	0	0
0	0	0	0	0	0	0	0	0	0	0	0	0	0	0	0	0	0	0	0	0	0	0	0	0	0	0	0	0	0
0	0	0	0	0	0	0	0	0	0	0	0	0	0	0	0	0	0	0	0	0	0	0	0	0	0	0	0	0	0
0	0	0	0	0	0	0	0	0	0	0	0	0	0	0	0	0	0	0	0	0	0	0	0	0	0	0	0	0	0
0	0	0	0	0	0	0	0	0	0	0	0	0	0	0	0	0	0	0	0	0	0	0	0	0	0	0	0	0	0
0	0	0	0	0	0	0	0	0	0	0	0	0	0	0	0	0	0	0	0	0	0	0	0	0	0	0	0	0	0
0	0	0	0	0	0	0	0	0	0	0	0	0	0	0	0	0	0	0	0	0	0	0	0	0	0	0	0	0	0
0	0	0	0	0	0	0	0	0	0	0	0	0	0	0	0	0	0	0	0	0	0	0	0	0	0	0	0	0	0
0	0	0	0	0	0	0	0	0	0	0	0	0	0	0	0	0	0	0	0	0	0	0	0	0	0	0	0	0	0
0	0	0	0	0	0	0	0	0	0	0	0	0	0	0	0	0	0	0	0	0	0	0	0	0	0	0	0	0	0
0	0	0	0	0	0	0	0	0	0	0	0	0	0	0	0	0	0	0	0	0	0	0	0	0	0	0	0	0	0
0	0	0	0	0	0	0	0	0	0	0	0	0	0	0	0	0	0	0	0	0	0	0	0	0	0	0	0	0	0
0	0	0	0	0	0	0	0	0	0	0	0	0	0	0	0	0	0	0	0	0	0	0	0	0	0	0	0	0	0
0	0	0	0	0	0	0	0	0	0	0	0	0	0	0	0	0	0	0	0	0	0	0	0	0	0	0	0	0	0
0	0	0	0	0	0	0	0	0	0	0	0	0	0	0	0	0	0	0	0	0	0	0	0	0	0	0	0	0	0
0	0	0	0	0	0	0	0	0	0	0	0	0	0	0	0	0	0	0	0	0	0	0	0	0	0	0	0	0	0
0	0	0	0	0	0	0	0	0	0	0	0	0	0	0	0	0	0	0	0	0	0	0	0	0	0	0	0	0	0
0	0	0	0	0	0	0	0	0	0	0	0	0	0	0	0	0	0	0	0	0	0	0	0	0	0	0	0	0	0
0	0	0	0	0	0	0	0	0	0	0	0	0	0	0	0	0	0	0	0	0	0	0	0	0	0	0	0	0	0
0	0	0	0	0	0	0	0	0	0	0	0	0	0	0	0	0	0	0	0	0	0	0	0	0	0	0	0	0	0
0	0	0	0	0	0	0	0	0	0	0	0	0	0	0	0	0	0	0	0	0	0	0	0	0	0	0	0	0	0
0	0	0	0	0	0	0	0	0	0	0	0	0	0	0	0	0	0	0	0	0	0	0	0	0	0	0	0	0	0
0	0	0	0	0	0	0	0	0	0	0	0	0	0	0	0	0	0	0	0	0	0	0	0	0	0	0	0	0	0
0	0	0	0	0	0	0	0	0	0	0	0	0	0	0	0	0	0	0	0	0	0	0	0	0	0	0	0	0	0
0	0	0	0	0	0	0	0	0	0	0	0	0	0	0	0	0	0	0	0	0	0	0	0	0	0	0	0	0	0
0	0	0	0	0	0	0	0	0	0	0	0	0	0	0	0	0	0	0	0	0	0	0	0	0	0	0	0	0	0
0	0	0	0	0	0	0	0	0	0	0	0	0	0	0	0	0	0	0	0	0	0	0	0	0	0	0	0	0	0
0	0	0	0	0	0	0	0	0	0	0	0	0	0	0	0	0	0	0	0	0	0	0	0	0	0	0	0	0	0
0	0	0	0	0	0	0	0	0	0	0	0	0	0	0	0	0	0	0	0	0	0	0	0	0	0	0	0	0	0
0	0	0	0	0	0	0	0	0	0	0	0	0	0	0	0	0	0	0	0	0	0	0	0	0	0	0	0	0	0
0	0	0	0	0	0	0	0	0	0	0	0	0	0	0	0	0	0	0	0	0	0	0	0	0	0	0	0	0	0
0	0	0	0	0	0	0	0	0	0	0	0	0	0	0	0	0	0	0	0	0	0	0	0	0	0	0	0	0	0
0	0	0	0	0	0	0	0	0	0	0	0	0	0	0	0	0	0	0	0	0	0	0	0	0	0	0	0	0	0
0	0	0	0	0	0	0	0	0	0	0	0	0	0	0	0	0	0	0	0	0	0	0	0	0	0	0	0	0	0
0	0	0	0	0	0	0	0	0	0	0	0	0	0	0	0	0	0	0	0	0	0	0	0	0	0	0	0	0	0
0	0	0	0	0	0	0	0	0	0	0	0	0	0	0	0	0	0	0	0	0	0	0	0	0	0	0	0	0	0
0	0	0	0	0	0	0	0	0	0	0	0	0	0	0	0	0	0	0	0	0	0	0	0	0	0	0	0	0	0
0	0	0	0	0	0	0	0	0	0	0	0	0	0	0	0	0	0	0	0	0	0	0	0	0	0	0	0	0	0
0	0	0	0	0	0	0	0	0	0	0	0	0	0	0	0	0	0	0	0	0	0	0	0	0	0	0	0	0	0
0	0	0	0	0	0	0	0	0	0	0	0	0	0	0	0	0	0	0	0	0	0	0	0	0	0	0	0	0	0
0	0	0	0	0	0	0	0	0	0	0	0	0	0	0	0	0	0	0	0	0	0	0	0	0	0	0	0	0	0
0	0	0	0	0	0	0	0	0	0	0	0	0	0	0	0	0	0	0	0	0	0	0	0	0	0	0	0	0	0
0	0	0	0	0	0	0	0	0	0	0	0	0	0	0	0	0	0	0	0	0	0	0	0	0	0	0	0	0	0
0	0	0	0	0	0	0	0	0	0	0	0	0	0	0	0	0	0	0	0	0	0	0	0	0	0	0	0	0	0
0	0	0	0	0	0	0	0	0	0	0	0	0	0	0	0	0	0	0	0	0	0	0	0	0	0	0	0	0	0
0	0	0	0	0	0	0	0	0	0	0	0	0	0	0	0	0	0	0	0	0	0	0	0	0	0	0	0	0	0
0	0	0	0	0	0	0	0	0	0	0	0	0	0	0	0	1	0	0	0	0	0	0	0	0	0	0	0	0	0
0	0	0	0	0	0	0	0	0	0	0	0	0	0	0	0	1	0	0	0	0	0	0	0	0	0	0	0	0	0
0	0	0	0	0	0	0	0	0	0	0	0	0	0	0	0	0	0	0	0	0	0	0	0	0	0	0	0	0	0
0	0	0	0	0	0	0	0	0	0	0	0	0	0	0	0	0	0	0	0	0	0	0	0	0	0	0	0	0	0
0	0	0	0	0	0	0	0	0	0	0	0	0	0	0	0	0	0	0	0	0	0	0	0	0	0	0	0	0	0
0	0	0	0	0	0	0	0	0	0	0	0	0	0	0	0	0	0	0	0	0	0	0	0	0	0	0	0	0	0
0	0	0	0	0	0	0	0	0	0	0	0	0	0	0	0	0	0	0	0	0	0	0	0	0	0	0	0	0	0
0	0	0	0	0	0	0	0	0	0	0	0	0	0	0	0	0	0	0	0	0	0	0	0	0	0	0	0	0	0
0	0	0	0	0	0	0	0	0	0	0	0	0	0	0	0	0	0	0	0	0	0	0	0	0	0	0	0	0	0
0	0	0	0	0	0	0	0	0	0	0	0	0	0	0	0	0	0	0	0	0	0	0	0	0	0	0	0	0	0
0	0	0	0	0	0	0	0	0	0	0	0	0	0	0	0	0	0	0	0	0	0	0	0	0	0	0	0	0	0
0	0	0	0	0	0	0	0	0	0	0	0	0	0	0	0	0	0	0	0	0	0	0	0	0	0	0	0	0	0
0	0	0	0	0	0	0	0	0	0	0	0	0	0	0	0	0	0	0	0	0	0	0	0	0	0	0	0	0	0
0	0	0	0	0	0	0	0	0	0	0	0	0	0	0	0	0	0	0	0	0	0	0	0	0	0	0	0	0	0
0	0	0	0	0	0	0	0	0	0	0	0	0	0	0	0	0	0	0	0	0	0	0	0	0	0	0	0	0	0
0	0	0	0	0	0	0	0	0	0	0	0	0	0	0	0	0	0	0	0	0	0	0	0	0	0	0	0	0	0
0	0	0	0	0	0	0	0	0	0	0	0	0	0	0	0	0	0	0	0	0	0	0	0	0	0	0	0	0	0
0	0	0	0	0	0	0	0	0	0	0	0	0	0	0	0	0	0	0	0	0	0	0	0	0	0	0	0	0	0
0	0	0	0	0	0	0	0	0	0	0	0	0	0	0	0	0	0	0	0	0	0	0	0	0	0	0	0	0	0
0	0	0	0	0	0	0	0	0	0	0	0	0	0	0	0	0	0	0	0	0	0	0	0	0	0	0	0	0	0
0	0	0	0	0	0	0	0	0	0	0	0	0	0	0	0	0	0	0	0	0	0	0	0	0	0	0	0	0	0
0	0	0	0	0	0	0	0	0	0	0	0	0	0	0	0	0	0	0	0	0	0	0	0	0	0	0	0	0	0
0	0	0	0	0	0	0	0	0	0	0	0	0	0	0	0	0	0	0	0	0	0	0	0	0	0	0	0	0	0
0	0	0	0	0	0	0	0	0	0	0	0	0	0	0	0	0	0	0	0	0	0	0	0	0	0	0	0	0	0
0	0	0	0	0	0	0	0	0	0	0	0	0	0	0	0	0	0	0	0	0	0	0	0	0	0	0	0	0	0
0	0	0	0	0	0	0	0	0	0	0	0	0	0	0	0	0	0	0	0	0	0	0	0	0	0	0	0	0	0
0	0	0	0	0	0	0	0	0	0	0	0	0	0	0	0	0	0	0	0	0	0	0	0	0	0	0	0	0	0
0	0	0	0	0	0	0	0	0	0	0	0	0	0	0	0	0	0	0	0	0	0	0	0	0	0	0	0	0	0
0	0	0	0	0	0	0	0	0	0	0	0	0	0	0	0	0	0	0	0	0	0	0	0	0	0	0	0	0	0
0	0	0	0	0	0	0	0	0	0	0	0	0	0	0	0	0	0	0	0	0	0	0	0	0	0	0	0	0	0
0	0	0	0	0	0	0	0	0	0	0	0	0	0	0	0	0	0	0	0	0	0	0	0	0	0	0	0	0	0
0	0	0	0	0	0	0	0	0	0	0	0	0	0	0	0	0	0	0	0	0	0	0	0	0	0	0	0	0	0
0	0	0	0	0	0	0	0	0	0	0	0	0	0	0	0	0	0	0	0	0	0	0	0	0	0	0	0	0	0
0	0	0	0	0	0	0	0	0	0	0	0	0	0	0	0	0	0	0	0	0	0	0	0	0	0	0	0	0	0
0	0	0	0	0	0	0	0	0	0	0	0	0	0	0	0	0	0	0	0	0	0	0	0	0	0	0	0	0	0
0	0	0	0	0	0	0	0	0	0	0	0	0	0	0	0	0	0	0	0	0	0	0	0	0	0	0	0	0	0
0	0	0	0	0	0	0	0	0	0	0	0	0	0	0	0	0	0	0	0	0	0	0	0	0	0	0	0	0	0
0	0	0	0	0	0	0	0	0	0	0	0	0	0	0	0	0	0	0	0	0	0	0	0	0	0	0	0	0	0
0	0	0	0	0	0	0	0	0	0	0	0	0	0	0	0	0	0	0	0	0	0	0	0	1	0	0	0	0	0
0	0	0	0	0	0	0	0	0	0	0	0	0	0	0	0	0	0	0	0	0	0	0	0	1	0	0	0	0	0
0	0	0	0	0	0	0	0	0	0	0	0	0	0	0	0	0	0	0	0	0	0	0	0	0	0	0	0	0	0
0	0	0	0	0	0	0	0	0	0	0	0	0	0	0	0	0	0	0	0	0	0	0	0	0	0	0	0	0	0
0	0	0	0	0	0	0	0	0	0	0	0	0	0	0	0	0	0	0	0	0	0	0	0	0	0	0	0	0	0
0	0	0	0	0	0	0	0	0	0	0	0	0	0	0	0	0	0	0	0	0	0	0	0	0	0	0	0	0	0
0	0	0	0	0	0	0	0	0	0	0	0	0	0	0	0	0	0	0	0	0	0	0	0	0	0	0	0	0	0
0	0	0	0	0	0	0	0	0	0	0	0	0	0	0	0	0	0	0	0	0	0	0	0	0	0	0	0	0	0
0	0	0	0	0	0	0	0	0	0	0	0	0	0	0	0	0	0	0	0	0	0	0	0	0	0	0	0	0	0
0	0	0	0	0	0	0	0	0	0	0	0	0	0	0	0	0	0	0	0	0	0	0	0	0	0	0	0	0	0
0	0	0	0	0	0	0	0	0	0	0	0	0	0	0	0	0	0	0	0	0	0	0	0	0	0	0	0	0	0
0	0	0	0	0	0	0	0	0	0	0	0	0	0	0	0	0	0	0	0	0	0	0	0	0	0	0	0	0	0
0	0	0	0	0	0	0	0	0	0	0	0	0	0	0	0	0	0	0	0	0	0	0	0	0	0	0	0	0	0
0	0	0	0	0	0	0	0	0	0	0	0	0	0	0	0	0	0	0	0	0	0	0	0	0	0	0	0	0	0
0	0	0	0	0	0	0	0	0	0	0	0	0	0	0	0	0	0	0	0	0	0	0	0	0	0	0	0	0	0
0	0	0	0	0	0	0	0	0	0	0	0	0	0	0	0	0	0	0	0	0	0	0	0	0	0	0	0	0	0
0	0	0	0	0	0	0	0	0	0	0	0	0	0	0	0	0	0	0	0	0	0	0	0	0	0	0	0	0	0
0	0	0	0	0	0	0	0	0	0	0	0	0	0	0	0	0	0	0	0	0	0	0	0	0	0	0	0	0	0
0	0	0	0	0	0	0	0	0	0	0	0	0	0	0	0	0	0	0	0	0	0	0	0	0	0	0	0	0	0
0	0	0	0	0	0	0	0	0	0	0	0	0	0	0	0	0	0	0	0	0	0	0	0	0	0	0	0	0	0
0	0	0	0	0	0	0	0	0	0	0	0	0	0	0	0	0	0	0	0	0	0	0	0	0	0	0	0	0	0
0	0	0	0	0	0	0	0	0	0	0	0	0	0	0	0	0	0	0	0	0	0	0	0	0	0	0	0	0	0
0	0	0	0	0	0	0	0	0	0	0	0	0	0	0	0	0	0	0	0	0	0	0	0	0	0	0	0	0	0
0	0	0	0	0	0	0	0	0	0	0	0	0	0	0	0	0	0	0	0	0	0	0	0	0	0	0	0	0	0
0	0	0	0	0	0	0	0	0	0	0	0	0	0	0	0	0	0	0	0	0	0	0	0	0	0	0	0	0	0
0	0	0	0	0	0	0	0	0	0	0	0	0	0	0	0	0	0	0	0	0	0	0	0	0	0	0	0	0	0
0	0	0	0	0	0	0	0	0	0	0	0	0	0	0	0	0	0	0	0	0	0	0	0	0	0	0	0	0	0
0	0	0	0	0	0	0	0	0	0	0	0	0	0	0	0	0	0	0	0	0	0	0	0	0	0	0	0	0	0
0	0	0	0	0	0	0	0	0	0	0	0	0	0	0	0	0	0	0	0	0	0	0	0	0	0	0	0	0	0
0	0	0	0	0	0	0	0	0	0	0	0	0	0	0	0	0	0	0	0	0	0	0	0	0	0	0	0	0	0
0	0	0	0	0	0	0	0	0	0	0	0	0	0	0	0	0	0	0	0	0	0	0	0	0	0	0	0	0	0
0	0	0	0	0	0	0	0	0	0	0	0	0	0	0	0	0	0	0	0	0	0	0	0	0	0	0	0	0	0
0	0	0	0	0	0	0	0	0	0	0	0	0	0	0	0	0	0	0	0	0	0	0	0	0	0	0	0	0	0
0	0	0	0	0	0	0	0	0	0	0	0	0	0	0	0	0	0	0	0	0	0	0	0	0	0	0	0	0	0
0	0	0	0	0	0	0	0	0	0	0	0	0	0	0	0	0	0	0	0	0	0	0	0	0	0	0	0	0	0
0	0	0	0	0	0	0	0	0	0	0	0	0	0	0	0	0	0	0	0	0	0	0	0	0	0	0	0	0	0
0	0	0	0	0	0	0	0	0	0	0	0	0	0	0	0	0	0	0	0	0	0	0	0	0	0	0	0	0	0
0	0	0	0	0	0	0	0	0	0	0	0	0	0	0	0	0	0	0	0	0	0	0	0	0	0	0	0	0	0
0	0	0	0	0	0	0	0	0	0	0	0	0	0	0	0	0	0	0	0	0	0	0	0	0	0	0	0	0	0
0	0	0	0	0	0	0	0	0	0	0	0	0	0	0	0	0	0	0	0	0	0	0	0	0	0	0	0	0	0
0	0	0	0	0	0	0	0	0	0	0	0	0	0	0	0	0	0	0	0	0	0	0	0	0	0	0	0	0	0
0	0	0	0	0	0	0	0	0	0	0	0	0	0	0	0	0	0	0	0	0	0	0	0	0	0	0	0	0	0
0	0	0	0	0	0	0	0	0	0	0	0	0	0	0	0	0	0	0	0	0	0	0	0	0	0	0	0	0	0
0	0	0	0	0	0	0	0	0	0	0	0	0	0	0	0	0	0	0	0	0	0	0	0	0	0	0	0	0	0
0	0	0	0	0	0	0	0	0	0	0	0	0	0	0	0	0	0	0	0	0	0	0	0	0	0	0	0	0	0
0	0	0	0	0	0	0	0	0	0	0	0	0	0	0	0	0	0	0	0	0	0	0	0	0	0	0	0	0	0
0	0	0	0	0	0	0	0	0	0	0	0	0	0	0	0	0	0	0	0	0	0	0	0	0	0	0	0	0	0
0	0	0	0	0	0	0	0	0	0	0	0	0	0	0	0	0	0	0	0	0	0	0	0	0	0	0	0	0	0
0	0	0	0	0	0	0	0	0	0	0	0	0	0	0	0	0	0	0	0	0	0	0	0	0	0	0	0	0	0
0	0	0	0	0	0	0	0	0	0	0	0	0	0	0	0	0	0	0	0	0	0	0	0	0	0	0	0	0	0
0	0	0	0	0	0	0	0	0	0	0	0	0	0	0	0	0	0	0	0	0	0	0	0	0	0	0	0	0	0
0	0	0	0	0	0	0	0	0	0	0	0	0	0	0	0	0	0	0	0	0	0	0	0	0	0	0	0	0	0
0	0	0	0	0	0	0	0	0	0	0	0	0	0	0	0	0	0	0	0	0	0	0	0	0	0	0	0	0	0
0	0	0	0	0	0	0	0	0	0	0	0	0	0	0	0	0	0	0	0	0	0	0	0	0	0	0	0	0	0
0	0	0	0	0	0	0	0	0	0	0	0	0	0	0	0	0	0	0	0	0	0	0	0	0	0	0	0	0	0
0	0	0	0	0	0	0	0	0	0	0	0	0	0	0	0	0	0	0	0	0	0	0	0	0	0	0	0	0	0
0	0	0	0	0	0	0	0	0	0	0	0	0	0	0	0	0	0	0	0	0	0	0	0	0	0	0	0	0	0
0	0	0	0	0	0	0	0	0	0	0	0	0	0	0	0	0	0	0	0	0	0	0	0	0	0	0	0	0	0
0	0	0	0	0	0	0	0	0	0	0	0	0	0	0	0	0	0	0	0	0	0	0	0	0	0	0	0	0	0
0	0	0	0	0	0	0	0	0	0	0	0	0	0	0	0	0	0	0	0	0	0	0	0	0	0	0	0	0	0
0	0	0	0	0	0	0	0	0	0	0	0	0	0	0	0	0	0	0	0	0	0	0	0	0	0	0	0	0	0
0	0	0	0	0	0	0	0	0	0	0	0	0	0	0	0	0	0	0	0	0	0	0	0	0	0	0	0	0	0
0	0	0	0	0	0	0	0	0	0	0	0	0	0	0	0	0	0	0	0	0	0	0	0	0	0	0	0	0	0
0	0	0	0	0	0	0	0	0	0	0	0	0	0	0	0	0	0	0	0	0	0	0	0	0	0	0	0	0	0
0	0	0	0	0	0	0	0	0	0	0	0	0	0	0	0	0	0	0	0	0	0	0	0	0	0	0	0	0	0
0	0	0	0	0	0	0	0	0	0	0	0	0	0	0	0	0	0	0	0	0	0	0	0	0	0	0	0	0	0
0	0	0	0	0	0	0	0	0	0	0	0	0	0	0	0	0	0	0	0	0	0	0	0	0	0	0	0	0	0
0	0	0	0	0	0	0	0	0	0	0	0	0	0	0	0	0	0	0	0	0	0	0	0	0	0	0	0	0	0
0	0	0	0	0	0	0	0	0	0	0	0	0	0	0	0	0	0	0	0	0	0	0	0	0	0	0	0	0	0
0	0	0	0	0	0	0	0	0	0	0	0	0	0	0	0	0	0	0	0	0	0	0	0	0	0	0	0	0	0
0	0	0	0	0	0	0	0	0	0	0	0	0	0	0	0	0	0	0	0	0	0	0	0	0	0	0	0	0	0
0	0	0	0	0	0	0	0	0	0	0	0	0	0	0	0	0	0	0	0	0	0	0	0	0	0	0	0	0	0
0	0	0	0	0	0	0	0	0	0	0	0	0	0	0	0	0	0	0	0	0	0	0	0	0	0	0	0	0	0
0	0	0	0	0	0	0	0	0	0	0	0	0	0	0	0	0	0	0	0	0	0	0	0	0	0	0	0	0	0
0	0	0	0	0	0	0	0	0	0	0	0	0	0	0	0	0	0	0	0	0	0	0	0	0	0	0	0	0	0
0	0	0	0	0	0	0	0	0	0	0	0	0	0	0	0	0	0	0	0	0	0	0	0	0	0	0	0	0	0
0	0	0	0	0	0	0	0	0	0	0	0	0	0	0	0	0	0	0	0	0	0	0	0	0	0	0	0	0	0
0	0	0	0	0	0	0	0	0	0	0	0	0	0	0	0	0	0	0	0	0	0	0	0	0	0	0	0	0	0
0	0	0	0	0	0	0	0	0	0	0	0	0	0	0	0	0	0	0	0	0	0	0	0	0	0	0	0	0	0
0	0	0	0	0	0	0	0	0	0	0	0	0	0	0	0	0	0	0	0	0	0	0	0	0	0	0	0	0	0
0	0	0	0	0	0	0	0	0	0	0	0	0	0	0	0	0	0	0	0	0	0	0	0	0	0	0	0	0	0
0	0	0	0	0	0	0	0	0	0	0	0	0	0	0	0	0	0	0	0	0	0	0	0	0	0	0	0	0	0
0	0	0	0	0	0	0	0	0	0	0	0	0	0	0	0	0	0	0	0	0	0	0	0	0	0	0	0	0	0
0	0	0	0	0	0	0	0	0	0	0	0	0	0	0	0	0	0	0	0	0	0	0	0	0	0	0	0	0	0
0	0	0	0	0	0	0	0	0	0	0	0	0	0	0	0	0	0	0	0	0	0	0	0	0	0	0	0	0	0
0	0	0	0	0	0	0	0	0	0	0	0	0	0	0	0	0	0	0	0	0	0	0	0	0	0	0	0	0	0
0	0	0	0	0	0	0	0	0	0	0	0	0	0	0	0	0	0	0	0	0	0	0	0	0	0	0	0	0	0
0	0	0	0	0	0	0	0	0	0	0	0	0	0	0	0	0	0	0	0	0	0	0	0	0	0	0	0	0	0
0	0	0	0	0	0	0	0	0	0	0	0	0	0	0	0	0	0	0	0	0	0	0	0	0	0	0	0	0	0
0	0	0	0	0	0	0	0	0	0	0	0	0	0	0	0	0	0	0	0	0	0	0	0	0	0	0	0	0	0
0	0	0	0	0	0	0	0	0	0	0	0	0	0	0	0	0	0	0	0	0	0	0	0	0	0	0	0	0	0
0	0	0	0	0	0	0	0	0	0	0	0	0	0	0	0	0	0	0	0	0	0	0	0	0	0	0	0	0	0
0	0	0	0	0	0	0	0	0	0	0	0	0	0	0	0	0	0	0	0	0	0	0	0	0	0	0	0	0	0
0	0	0	0	0	0	0	0	0	0	0	0	0	0	0	0	0	0	0	0	0	0	0	0	0	0	0	0	0	0
0	0	0	0	0	0	0	0	0	0	0	0	0	0	0	0	0	0	0	0	0	0	0	0	0	0	0	0	0	0
0	0	0	0	0	0	0	0	0	0	0	0	0	0	0	0	0	0	0	0	0	0	0	0	0	0	0	0	0	0
0	0	0	0	0	0	0	0	0	0	0	0	0	0	0	0	0	0	0	0	0	0	0	0	0	0	0	0	0	0
0	0	0	0	0	0	0	0	0	0	0	0	0	0	0	0	0	0	0	0	0	0	0	0	0	0	0	0	0	0
0	0	0	0	0	0	0	0	0	0	0	0	0	0	0	0	0	0	0	0	0	0	0	0	0	0	0	0	0	0
0	0	0	0	0	0	0	0	0	0	0	0	0	0	0	0	0	0	0	0	0	0	0	0	0	0	0	0	0	0
0	0	0	0	0	0	0	0	0	0	0	0	0	0	0	0	0	0	0	0	0	0	0	0	0	0	0	0	0	0
0	0	0	0	0	0	0	0	0	0	0	0	0	0	0	0	0	0	0	0	0	0	0	0	0	0	0	0	0	0
0	0	0	0	0	0	0	0	0	0	0	0	0	0	0	0	0	0	0	0	0	0	0	0	0	0	0	0	0	0
0	0	0	0	0	0	0	0	0	0	0	0	0	0	0	0	0	0	0	0	0	0	0	0	0	0	0	0	0	0
0	0	0	0	0	0	0	0	0	0	0	0	0	0	0	0	0	0	0	0	0	0	0	0	0	0	0	0	0	0
0	0	0	0	0	0	0	0	0	0	0	0	0	0	0	0	0	0	0	0	0	0	0	0	0	0	0	0	0	0
0	0	0	0	0	0	0	0	0	0	0	0	0	0	0	0	0	0	0	0	0	0	0	0	0	0	0	0	0	0
0	0	0	0	0	0	0	0	0	0	0	0	0	0	0	0	0	0	0	0	0	0	0	0	0	0	0	0	0	0
0	0	0	0	0	0	0	0	0	0	0	0	0	0	0	0	0	0	0	0	0	0	0	0	0	0	0	0	0	0
0	0	0	0	0	0	0	0	0	0	0	0	0	0	0	0	0	0	0	0	0	0	0	0	0	0	0	0	0	0
0	0	0	0	0	0	0	0	0	0	0	0	0	0	0	0	0	0	0	0	0	0	0	0	0	0	0	0	0	0
0	0	0	0	0	0	0	0	0	0	0	0	0	0	0	0	0	0	0	0	0	0	0	0	0	0	0	0	0	0
0	0	0	0	0	0	0	0	0	0	0	0	0	0	0	0	0	0	0	0	0	0	0	0	0	0	0	0	0	0
0	0	0	0	0	0	0	0	0	0	0	0	0	0	0	0	0	0	0	0	0	0	0	0	0	0	0	0	0	0
0	0	0	0	0	0	0	0	0	0	0	0	0	0	0	0	0	0	0	0	0	0	0	0	0	0	0	0	0	0
0	0	0	0	0	0	0	0	0	0	0	0	0	0	0	0	0	0	0	0	0	0	0	0	0	0	0	0	0	0
0	0	0	0	0	0	0	0	0	0	0	0	0	0	0	0	0	0	0	0	0	0	0	0	0	0	0	0	0	0
0	0	0	0	0	0	0	0	0	0	0	0	0	0	0	0	0	0	0	0	0	0	0	0	0	0	0	0	0	0
0	0	0	0	0	0	0	0	0	0	0	0	0	0	0	0	0	0	0	0	0	0	0	0	0	0	0	0	0	0
0	0	0	0	0	0	0	0	0	0	0	0	0	0	0	0	0	0	0	0	0	0	0	0	0	0	0	0	0	0
0	0	0	0	0	0	0	0	0	0	0	0	0	0	0	0	0	0	0	0	0	0	0	0	0	0	0	0	0	0
0	0	0	0	0	0	0	0	0	0	0	0	0	0	0	0	0	0	0	0	0	0	0	0	0	0	0	0	0	0
0	0	0	0	0	0	0	0	0	0	0	0	0	0	0	0	0	0	0	0	0	0	0	0	0	0	0	0	0	0
0	0	0	0	0	0	0	0	0	0	0	0	0	0	0	0	0	0	0	0	0	0	0	0	0	0	0	0	0	0
0	0	0	0	0	0	0	0	0	0	0	0	0	0	0	0	0	0	0	0	0	0	0	0	0	0	0	0	0	0
0	0	0	0	0	0	0	0	0	0	0	0	0	0	0	0	0	0	0	0	0	0	0	0	0	0	0	0	0	0
0	0	0	0	0	0	0	0	0	0	0	0	0	0	0	0	0	0	0	0	0	0	0	0	0	0	0	0	0	0
0	0	0	0	0	0	0	0	0	0	0	0	0	0	0	0	0	0	0	0	0	0	0	0	0	0	0	0	0	0
0	0	0	0	0	0	0	0	0	0	0	0	0	0	0	0	0	0	0	0	0	0	0	0	0	0	0	0	0	0
0	0	0	0	0	0	0	0	0	0	0	0	0	0	0	0	0	0	0	0	0	0	0	0	0	0	0	0	0	0
0	0	0	0	0	0	0	0	0	0	0	0	0	0	0	0	0	0	0	0	0	0	0	0	0	0	0	0	0	0
0	0	0	0	0	0	0	0	0	0	0	0	0	0	0	0	0	0	0	0	0	0	0	0	0	0	0	0	0	0
0	0	0	0	0	0	0	0	0	0	0	0	0	0	0	0	0	0	0	0	0	0	0	0	0	0	0	0	0	0
0	0	0	0	0	0	0	0	0	0	0	0	0	0	0	0	0	0	0	0	0	0	0	0	0	0	0	0	0	0
0	0	0	0	0	0	0	0	0	0	0	0	0	0	0	0	0	0	0	0	0	0	0	0	0	0	0	0	0	0
0	0	0	0	0	0	0	0	0	0	0	0	0	0	0	0	0	0	0	0	0	0	0	0	0	0	0	0	0	0
0	0	0	0	0	0	0	0	0	0	0	0	0	0	0	0	0	0	0	0	0	0	0	0	0	0	0	0	0	0
0	0	0	0	0	0	0	0	0	0	0	0	0	0	0	0	0	0	0	0	0	0	0	0	0	0	0	0	0	0
0	0	0	0	0	0	0	0	0	0	0	0	0	0	0	0	0	0	0	0	0	0	0	0	0	0	0	0	0	0
0	0	0	0	0	0	0	0	0	0	0	0	0	0	0	0	0	0	0	0	0	0	0	0	0	0	0	0	0	0
0	0	0	0	0	0	0	0	0	0	0	0	0	0	0	0	0	0	0	0	0	0	0	0	0	0	0	0	0	0
0	0	0	0	0	0	0	0	0	0	0	0	0	0	0	0	0	0	0	0	0	0	0	0	0	0	0	0	0	0
0	0	0	0	0	0	0	0	0	0	0	0	0	0	0	0	0	0	0	0	0	0	0	0	0	0	0	0	0	0
0	0	0	0	0	0	0	0	0	0	0	0	0	0	0	0	0	0	0	0	0	0	0	0	0	0	0	0	0	0
0	0	0	0	0	0	0	0	0	0	0	0	0	0	0	0	0	0	0	0	0	0	0	0	0	0	0	0	0	0
0	0	0	0	0	0	0	0	0	0	0	0	0	0	0	0	0	0	0	0	0	0	0	0	0	0	0	0	0	0
0	0	0	0	0	0	0	0	0	0	0	0	0	0	0	0	0	0	0	0	0	0	0	0	0	0	0	0	0	0
0	0	0	0	0	0	0	0	0	0	0	0	0	0	0	0	0	0	0	0	0	0	0	0	0	0	0	0	0	0
0	0	0	0	0	0	0	0	0	0	0	0	0	0	0	0	0	0	0	0	0	0	0	0	0	0	0	0	0	0
0	0	0	0	0	0	0	0	0	0	0	0	0	0	0	0	0	0	0	0	0	0	0	0	0	0	0	0	0	0
0	0	0	0	0	0	0	0	0	0	0	0	0	0	0	0	0	0	0	0	0	0	0	0	0	0	0	0	0	0
0	0	0	0	0	0	0	0	0	0	0	0	0	0	0	0	0	0	0	0	0	0	0	0	0	0	0	0	0	0
0	0	0	0	0	0	0	0	0	0	0	0	0	0	0	0	0	0	0	0	0	0	0	0	0	0	0	0	0	0
0	0	0	0	0	0	0	0	0	0	0	0	0	0	0	0	0	0	0	0	0	0	0	0	0	0	0	0	0	0
0	0	0	0	0	0	0	0	0	0	0	0	0	0	0	0	0	0	0	0	0	0	0	0	0	0	0	0	0	0
0	0	0	0	0	0	0	0	0	0	0	0	0	0	0	0	0	0	0	0	0	0	0	0	0	0	0	0	0	0
0	0	0	0	0	0	0	0	0	0	0	0	0	0	0	0	0	0	0	0	0	0	0	0	0	0	0	0	0	0
0	0	0	0	0	0	0	0	0	0	0	0	0	0	0	0	0	0	0	0	0	0	0	0	0	0	0	0	0	0
0	0	0	0	0	0	0	0	0	0	0	0	0	0	0	0	0	0	0	0	0	0	0	0	0	0	0	0	0	0
0	0	0	0	0	0	0	0	0	0	0	0	0	0	0	0	0	0	0	0	0	0	0	0	0	0	0	0	0	0
0	0	0	0	0	0	0	0	0	0	0	0	0	0	0	0	0	0	0	0	0	0	0	0	0	0	0	0	0	0
0	0	0	0	0	0	0	0	0	0	0	0	0	0	0	0	0	0	0	0	0	0	0	0	0	0	0	0	0	0
0	0	0	0	0	0	0	0	0	0	0	0	0	0	0	0	0	0	0	0	0	0	0	0	0	0	0	0	0	0
0	0	0	0	0	0	0	0	0	0	0	0	0	0	0	0	0	0	0	0	0	0	0	0	0	0	0	0	0	0
0	0	0	0	0	0	0	0	0	0	0	0	0	0	0	0	0	0	0	0	0	0	0	0	0	0	0	0	0	0
0	0	0	0	0	0	0	0	0	0	0	0	0	0	0	0	0	0	0	0	0	0	0	0	0	0	0	0	0	0
0	0	0	0	0	0	0	0	0	0	0	0	0	0	0	0	0	0	0	0	0	0	0	0	0	0	0	0	0	0
0	0	0	0	0	0	0	0	0	0	0	0	0	0	0	0	0	0	0	0	0	0	0	0	0	0	0	0	0	0
0	0	0	0	0	0	0	0	0	0	0	0	0	0	0	0	0	0	0	0	0	0	0	0	0	0	0	0	0	0
0	0	0	0	0	0	0	0	0	0	0	0	0	0	0	0	0	0	0	0	0	0	0	0	0	0	0	0	0	0
0	0	0	0	0	0	0	0	0	0	0	0	0	0	0	0	0	0	0	0	0	0	0	0	0	0	0	0	0	0
0	0	0	0	0	0	0	0	0	0	0	0	0	0	0	0	0	0	0	0	0	0	0	0	0	0	0	0	0	0
0	0	0	0	0	0	0	0	0	0	0	0	0	0	0	0	0	0	0	0	0	0	0	0	0	0	0	0	0	0
0	0	0	0	0	0	0	0	0	0	0	0	0	0	0	0	0	0	0	0	0	0	0	0	0	0	0	0	0	0
0	0	0	0	0	0	0	0	0	0	0	0	0	0	0	0	0	0	0	0	0	0	0	0	0	0	0	0	0	0
0	0	0	0	0	0	0	0	0	0	0	0	0	0	0	0	0	0	0	0	0	0	0	0	0	0	0	0	0	0
0	0	0	0	0	0	0	0	0	0	0	0	0	0	0	0	0	0	0	0	0	0	0	0	0	0	0	0	0	0
0	0	0	0	0	0	0	0	0	0	0	0	0	0	0	0	0	0	0	0	0	0	0	0	0	0	0	0	0	0
0	0	0	0	0	0	0	0	0	0	0	0	0	0	0	0	0	0	0	0	0	0	0	0	0	0	0	0	0	0
0	0	0	0	0	0	0	0	0	0	0	0	0	0	0	0	0	0	0	0	0	0	0	0	0	0	0	0	0	0
0	0	0	0	0	0	0	0	0	0	0	0	0	0	0	0	0	0	0	0	0	0	0	0	0	0	0	0	0	0
0	0	0	0	0	0	0	0	0	0	0	0	0	0	0	0	0	0	0	0	0	0	0	0	0	0	0	0	0	0
0	0	0	0	0	0	0	0	0	0	0	0	0	0	0	0	0	0	0	0	0	0	0	0	0	0	0	0	0	0
0	0	0	0	0	0	0	0	0	0	0	0	0	0	0	0	0	0	0	0	0	0	0	0	0	0	0	0	0	0
0	0	0	0	0	0	0	0	0	0	0	0	0	0	0	0	0	0	0	0	0	0	0	0	0	0	0	0	0	0
0	0	0	0	0	0	0	0	0	0	0	0	0	0	0	0	0	0	0	0	0	0	0	0	0	0	0	0	0	0
0	0	0	0	0	0	0	0	0	0	0	0	0	0	0	0	0	0	0	0	0	0	0	0	0	0	0	0	0	0
0	0	0	0	0	0	0	0	0	0	0	0	0	0	0	0	0	0	0	0	0	0	0	0	0	0	0	0	0	0
0	0	0	0	0	0	0	0	0	0	0	0	0	0	0	0	0	0	0	0	0	0	0	0	0	0	0	0	0	0
0	0	0	0	0	0	0	0	0	0	0	0	0	0	0	0	0	0	0	0	0	0	0	0	0	0	0	0	0	0
0	0	0	0	0	0	0	0	0	0	0	0	0	0	0	0	0	0	0	0	0	0	0	0	0	0	0	0	0	0
0	0	0	0	0	0	0	0	0	0	0	0	0	0	0	0	0	0	0	0	0	0	0	0	0	0	0	0	0	0
0	0	0	0	0	0	0	0	0	0	0	0	0	0	0	0	0	0	0	0	0	0	0	0	0	0	0	0	0	0
0	0	0	0	0	0	0	0	0	0	0	0	0	0	0	0	0	0	0	0	0	0	0	0	0	0	0	0	0	0
0	0	0	0	0	0	0	0	0	0	0	0	0	0	0	0	0	0	0	0	0	0	0	0	0	0	0	0	0	0
0	0	0	0	0	0	0	0	0	0	0	0	0	0	0	0	0	0	0	0	0	0	0	0	0	0	0	0	0	0
0	0	0	0	0	0	0	0	0	0	0	0	0	0	0	0	0	0	0	0	0	0	0	0	0	0	0	0	0	0
0	0	0	0	0	0	0	0	0	0	0	0	0	0	0	0	0	0	0	0	0	0	0	0	0	0	0	0	0	0
0	0	0	0	0	0	0	0	0	0	0	0	0	0	0	0	0	0	0	0	0	0	0	0	0	0	0	0	0	0
0	0	0	0	0	0	0	0	0	0	0	0	0	0	0	0	0	0	0	0	0	0	0	0	0	0	0	0	0	0
0	0	0	0	0	0	0	0	0	0	0	0	0	0	0	0	0	0	0	0	0	0	0	0	0	0	0	0	0	0
0	0	0	0	0	0	0	0	0	0	0	0	0	0	0	0	0	0	0	0	0	0	0	0	0	0	0	0	0	0
0	0	0	0	0	0	0	0	0	0	0	0	0	0	0	0	0	0	0	0	0	0	0	0	0	0	0	0	0	0
0	0	0	0	0	0	0	0	0	0	0	0	0	0	0	0	0	0	0	0	0	0	0	0	0	0	0	0	0	0
0	0	0	0	0	0	0	0	0	0	0	0	0	0	0	0	0	0	0	0	0	0	0	0	0	0	0	0	0	0
0	0	0	0	0	0	0	0	0	0	0	0	0	0	0	0	0	0	0	0	0	0	0	0	0	0	0	0	0	0
0	0	0	0	0	0	0	0	0	0	0	0	0	0	0	0	0	0	0	0	0	0	0	0	0	0	0	0	0	0
0	0	0	0	0	0	0	0	0	0	0	0	0	0	0	0	0	0	0	0	0	0	0	0	0	0	0	0	0	0
0	0	0	0	0	0	0	0	0	0	0	0	0	0	0	0	0	0	0	0	0	0	0	0	0	0	0	0	0	0
0	0	0	0	0	0	0	0	0	0	0	0	0	0	0	0	0	0	0	0	0	0	0	0	0	0	0	0	0	0
0	0	0	0	0	0	0	0	0	0	0	0	0	0	0	0	0	0	0	0	0	0	0	0	0	0	0	0	0	0
0	0	0	0	0	0	0	0	0	0	0	0	0	0	0	0	0	0	0	0	0	0	0	0	0	0	0	0	0	0
0	0	0	0	0	0	0	0	0	0	0	0	0	0	0	0	0	0	0	0	0	0	0	0	0	0	0	0	0	0
0	0	0	0	0	0	0	0	0	0	0	0	0	0	0	0	0	0	0	0	0	0	0	0	0	0	0	0	0	0
0	0	0	0	0	0	0	0	0	0	0	0	0	0	0	0	0	0	0	0	0	0	0	0	0	0	0	0	0	0
0	0	0	0	0	0	0	0	0	0	0	0	0	0	0	0	0	0	0	0	0	0	0	0	0	0	0	0	0	0
0	0	0	0	0	0	0	0	0	0	0	0	0	0	0	0	0	0	0	0	0	0	0	0	0	0	0	0	0	0
0	0	0	0	0	0	0	0	0	0	0	0	0	0	0	0	0	0	0	0	0	0	0	0	0	0	0	0	0	0
0	0	0	0	0	0	0	0	0	0	0	0	0	0	0	0	0	0	0	0	0	0	0	0	0	0	0	0	0	0
0	0	0	0	0	0	0	0	0	0	0	0	0	0	0	0	0	0	0	0	0	0	0	0	0	0	0	0	0	0
0	0	0	0	0	0	0	0	0	0	0	0	0	0	0	0	0	0	0	0	0	0	0	0	0	0	0	0	0	0
0	0	0	0	0	0	0	0	0	0	0	0	0	0	0	0	0	0	0	0	0	0	0	0	0	0	0	0	0	0
0	0	0	0	0	0	0	0	0	0	0	0	0	0	0	0	0	0	0	0	0	0	0	0	0	0	0	0	0	0
0	0	0	0	0	0	0	0	0	0	0	0	0	0	0	0	0	0	0	0	0	0	0	0	0	0	0	0	0	0
0	0	0	0	0	0	0	0	0	0	0	0	0	0	0	0	0	0	0	0	0	0	0	0	0	0	0	0	0	0
0	0	0	0	0	0	0	0	0	0	0	0	0	0	0	0	0	0	0	0	0	0	0	0	0	0	0	0	0	0
0	0	0	0	0	0	0	0	0	0	0	0	0	0	0	0	0	0	0	0	0	0	0	0	0	0	0	0	0	0
0	0	0	0	0	0	0	0	0	0	0	0	0	0	0	0	0	0	0	0	0	0	0	0	0	0	0	0	0	0
0	0	0	0	0	0	0	0	0	0	0	0	0	0	0	0	0	0	0	0	0	0	0	0	0	0	0	0	0	0
0	0	0	0	0	0	0	0	0	0	0	0	0	0	0	0	0	0	0	0	0	0	0	0	0	0	0	0	0	0
0	0	0	0	0	0	0	0	0	0	0	0	0	0	0	0	0	0	0	0	0	0	0	0	0	0	0	0	0	0
0	0	0	0	0	0	0	0	0	0	0	0	0	0	0	0	0	0	0	0	0	0	0	0	0	0	0	0	0	0
0	0	0	0	0	0	0	0	0	0	0	0	0	0	0	0	0	0	0	0	0	0	0	0	0	0	0	0	0	0
0	0	0	0	0	0	0	0	0	0	0	0	0	0	0	0	0	0	0	0	0	0	0	0	0	0	0	0	0	0
0	0	0	0	0	0	0	0	0	0	0	0	0	0	0	0	0	0	0	0	0	0	0	0	0	0	0	0	0	0
0	0	0	0	0	0	0	0	0	0	0	0	0	0	0	0	0	0	0	0	0	0	0	0	0	0	0	0	0	0
0	0	0	0	0	0	0	0	0	0	0	0	0	0	0	0	0	0	0	0	0	0	0	0	0	0	0	0	0	0
0	0	0	0	0	0	0	0	0	0	0	0	0	0	0	0	0	0	0	0	0	0	0	0	0	0	0	0	0	0
0	0	0	0	0	0	0	0	0	0	0	0	0	0	0	0	0	0	0	0	0	0	0	0	0	0	0	0	0	0
0	0	0	0	0	0	0	0	0	0	0	0	0	0	0	0	0	0	0	0	0	0	0	0	0	0	0	0	0	0
0	0	0	0	0	0	0	0	0	0	0	0	0	0	0	0	0	0	0	0	0	0	0	0	0	0	0	0	0	0
0	0	0	0	0	0	0	0	0	0	0	0	0	0	0	0	0	0	0	0	0	0	0	0	0	0	0	0	0	0
0	0	0	0	0	0	0	0	0	0	0	0	0	0	0	0	0	0	0	0	0	0	0	0	0	0	0	0	0	0
0	0	0	0	0	0	0	0	0	0	0	0	0	0	0	0	0	0	0	0	0	0	0	0	0	0	0	0	0	0
0	0	0	0	0	0	0	0	0	0	0	0	0	0	0	0	0	0	0	0	0	0	0	0	0	0	0	0	0	0
0	0	0	0	0	0	0	0	0	0	0	0	0	0	0	0	0	0	0	0	0	0	0	0	0	0	0	0	0	0
0	0	0	0	0	0	0	0	0	0	0	0	0	0	0	0	0	0	0	0	0	0	0	0	0	0	0	0	0	0
0	0	0	0	0	0	0	0	0	0	0	0	0	0	0	0	0	0	0	0	0	0	0	0	0	0	0	0	0	0
0	0	0	0	0	0	0	0	0	0	0	0	0	0	0	0	0	0	0	0	0	0	0	0	0	0	0	0	0	0
0	0	0	0	0	0	0	0	0	0	0	0	0	0	0	0	0	0	0	0	0	0	0	0	0	0	0	0	0	0
0	0	0	0	0	0	0	0	0	0	0	0	0	0	0	0	0	0	0	0	0	0	0	0	0	0	0	0	0	0
0	0	0	0	0	0	0	0	0	0	0	0	0	0	0	0	0	0	0	0	0	0	0	0	0	0	0	0	0	0
0	0	0	0	0	0	0	0	0	0	0	0	0	0	0	0	0	0	0	0	0	0	0	0	0	0	0	0	0	0
0	0	0	0	0	0	0	0	0	0	0	0	0	0	0	0	0	0	0	0	0	0	0	0	0	0	0	0	0	0
0	0	0	0	0	0	0	0	0	0	0	0	0	0	0	0	0	0	0	0	0	0	0	0	0	0	0	0	0	0
0	0	0	0	0	0	0	0	0	0	0	0	0	0	0	0	0	0	0	0	0	0	0	0	0	0	0	0	0	0
0	0	0	0	0	0	0	0	0	0	0	0	0	0	0	0	0	0	0	0	0	0	0	0	0	0	0	0	0	0
0	0	0	0	0	0	0	0	0	0	0	0	0	0	0	0	0	0	0	0	0	0	0	0	0	0	0	0	0	0
0	0	0	0	0	0	0	0	0	0	0	0	0	0	0	0	0	0	0	0	0	0	0	0	0	1	0	0	0	0
0	0	0	0	0	0	0	0	0	0	0	0	0	0	0	0	0	0	0	0	0	0	0	0	0	1	0	0	0	0
0	0	0	0	0	0	0	0	0	0	0	0	0	0	0	0	0	0	0	0	0	0	0	0	0	0	0	0	0	0
0	0	0	0	0	0	0	0	0	0	0	0	0	0	0	0	0	0	0	0	0	0	0	0	0	0	0	0	0	0
0	0	0	0	0	0	0	0	0	0	0	0	0	0	0	0	0	0	0	0	0	0	0	0	0	0	0	0	0	0
0	0	0	0	0	0	0	0	0	0	0	0	0	0	0	0	0	0	0	0	0	0	0	0	0	0	0	0	0	0
0	0	0	0	0	0	0	0	0	0	0	0	0	0	0	0	0	0	0	0	0	0	0	0	0	0	0	0	0	0
0	0	0	0	0	0	0	0	0	0	0	0	0	0	0	0	0	0	0	0	0	0	0	0	0	0	0	0	0	0
0	0	0	0	0	0	0	0	0	0	0	0	0	0	0	0	0	0	0	0	0	0	0	0	0	0	0	0	0	0
0	0	0	0	0	0	0	0	0	0	0	0	0	0	0	0	0	0	0	0	0	0	0	0	0	0	0	0	0	0
0	0	0	0	0	0	0	0	0	0	0	0	0	0	0	0	0	0	0	0	0	0	0	0	0	0	0	0	0	0
0	0	0	0	0	0	0	0	0	0	0	0	0	0	0	0	0	0	0	0	0	0	0	0	0	0	0	0	0	0
0	0	0	0	0	0	0	0	0	0	0	0	0	0	0	0	0	0	0	0	0	0	0	0	0	0	0	0	0	0
0	0	0	0	0	0	0	0	0	0	0	0	0	0	0	0	0	0	0	0	0	0	0	0	0	0	0	0	0	0
0	0	0	0	0	0	0	0	0	0	0	0	0	0	0	0	0	0	0	0	0	0	0	0	0	0	0	0	0	0
0	0	0	0	0	0	0	0	0	0	0	0	0	0	0	0	0	0	0	0	0	0	0	0	0	0	0	0	0	0
0	0	0	0	0	0	0	0	0	0	0	0	0	0	0	0	0	0	0	0	0	0	0	0	0	0	0	0	0	0
0	0	0	0	0	0	0	0	0	0	0	0	0	0	0	0	0	0	0	0	0	0	0	0	0	0	0	0	0	0
0	0	0	0	0	0	0	0	0	0	0	0	0	0	0	0	0	0	0	0	0	0	0	0	0	0	0	0	0	0
0	0	0	0	0	0	0	0	0	0	0	0	0	0	0	0	0	0	0	0	0	0	0	0	0	0	0	0	0	0
0	0	0	0	0	0	0	0	0	0	0	0	0	0	0	0	0	0	0	0	0	0	0	0	0	0	0	0	0	0
0	0	0	0	0	0	0	0	0	0	0	0	0	0	0	0	0	0	0	0	0	0	0	0	0	0	0	0	0	0
0	0	0	0	0	0	0	0	0	0	0	0	0	0	0	0	0	0	0	0	0	0	0	0	0	0	0	0	0	0
0	0	0	0	0	0	0	0	0	0	0	0	0	0	0	0	0	0	0	0	0	0	0	0	0	0	0	0	0	0
0	0	0	0	0	0	0	0	0	0	0	0	0	0	0	0	0	0	0	0	0	0	0	0	0	0	0	0	0	0
0	0	0	0	0	0	0	0	0	0	0	0	0	0	0	0	0	0	0	0	0	0	0	0	0	0	0	0	0	0
0	0	0	0	0	0	0	0	0	0	0	0	0	0	0	0	0	0	0	0	0	0	0	0	0	0	0	0	0	0
0	0	0	0	0	0	0	0	0	0	0	0	0	0	0	0	0	0	0	0	0	0	0	0	0	0	0	0	0	0
0	0	0	0	0	0	0	0	0	0	0	0	0	0	0	0	0	0	0	0	0	0	0	0	0	0	0	0	0	0
0	0	0	0	0	0	0	0	0	0	0	0	0	0	0	0	0	0	0	0	0	0	0	0	0	0	0	0	0	0
0	0	0	0	0	0	0	0	0	0	0	0	0	0	0	0	0	0	0	0	0	0	0	0	0	0	0	0	0	0
0	0	0	0	0	0	0	0	0	0	0	0	0	0	0	0	0	0	0	0	0	0	0	0	0	0	0	0	0	0
0	0	0	0	0	0	0	0	0	0	0	0	0	0	0	0	0	0	0	0	0	0	0	0	0	0	0	0	0	0

## Sheet: ERK_fNuc
0.638277	0.668525	0.651759	0.625616	0.676464	0.655431	0.474377	0.507121	0.551418	0.621564	0.567414	0.612242	0.651107	0.662217	0.670508	0.677462	0.677039	0.673636	0.477043	0.515763	0.553311	0.551786	0.617467	0.590683	0.629426	0.664479	0.676977	0.68193	0.681247	0.676689
0.646925	0.616973	0.604586	0.634011	0.641939	0.497727	0.454691	0.46516	0.509481	0.53402	0.588884	0.601519	0.628501	0.65209	0.653297	0.660398	0.651499	0.646839	0.638224	0.488158	NaN	NaN	NaN	NaN	NaN	NaN	NaN	NaN	NaN	NaN
0.588323	0.602693	0.611327	0.631813	0.570076	0.4995	NaN	NaN	NaN	NaN	NaN	NaN	NaN	NaN	NaN	NaN	NaN	NaN	NaN	NaN	NaN	NaN	NaN	NaN	NaN	NaN	NaN	NaN	NaN	NaN
NaN	NaN	NaN	NaN	NaN	NaN	NaN	NaN	NaN	0.54866	0.573945	0.555271	0.527934	0.561761	0.566444	0.552945	0.572742	0.584117	NaN	NaN	NaN	NaN	NaN	NaN	NaN	NaN	NaN	NaN	NaN	NaN
NaN	NaN	NaN	NaN	NaN	NaN	NaN	NaN	NaN	0.54866	0.573945	0.555271	0.501368	0.530972	0.527244	0.587919	0.566769	0.589282	0.603701	0.475794	0.534482	0.579494	0.591562	0.610639	0.622683	0.635856	0.641155	0.643444	0.642483	0.641912
0.598634	0.518179	0.567208	0.577685	0.534957	0.553762	0.424578	0.388888	0.544799	0.545804	0.606215	0.561859	0.602734	0.646158	0.660469	0.655704	0.650718	0.643096	0.54844	0.417096	0.523378	0.609445	0.565648	0.616128	0.642373	0.662554	0.670775	0.683765	0.671401	0.670772
0.659822	0.699946	0.690539	0.68603	0.691842	0.685784	0.452282	0.472838	0.553581	0.648824	0.667368	0.685242	0.69091	0.699124	0.707804	0.717269	0.721054	0.710553	0.501589	0.517818	0.631348	0.681963	0.687029	0.590261	0.666937	0.712263	0.725466	0.733215	0.729353	0.73652
0.671119	0.694451	0.700788	0.698895	0.705587	0.707715	0.450363	0.469117	0.550509	0.662626	0.680476	0.688712	0.69503	0.697708	0.7143	0.723079	0.732882	0.727233	0.501958	0.521695	0.635896	0.673982	0.680331	0.590329	0.666704	0.703622	0.715333	0.731061	0.725346	0.741019
0.594279	0.615537	0.640898	0.634156	0.647861	0.639028	0.431908	0.368398	0.439769	0.515459	0.585461	0.614732	0.604983	0.618475	0.638381	0.655811	0.655097	0.655755	0.638753	0.437041	0.476782	0.563802	0.601119	0.58376	0.585691	0.621828	0.634105	0.641014	0.63392	0.638318
NaN	NaN	NaN	NaN	NaN	NaN	NaN	NaN	NaN	NaN	NaN	NaN	NaN	NaN	NaN	NaN	NaN	NaN	NaN	NaN	NaN	NaN	NaN	NaN	NaN	NaN	NaN	NaN	NaN	NaN
0.364484	0.356412	0.369395	0.373304	0.397332	0.382173	0.385411	0.395133	0.364915	0.399883	0.449738	0.457621	0.437539	0.437069	0.432742	0.434677	0.429743	0.400796	0.423976	0.397163	0.354625	0.337763	0.350073	0.360376	0.407685	0.37943	0.412228	0.408392	0.390633	NaN
0.164321	0.286473	0.233819	0.239315	0.226428	0.286086	0.256428	0.248666	0.300363	0.248876	0.253723	0.213306	0.250004	0.238475	0.239577	0.231765	0.25572	0.191698	0.214915	0.2146	0.244357	0.260988	0.216325	0.176928	0.162401	0.175138	0.174074	0.184949	0.170015	NaN
0.607123	0.59219	0.598991	0.632435	0.629514	0.503751	0.429172	0.421455	0.440384	0.562802	0.606514	0.576387	0.637765	0.669037	0.675842	0.68186	0.672537	0.677937	0.682914	0.442187	0.50585	0.618703	0.667433	0.694563	0.6851	0.677517	0.669506	0.670666	0.660953	0.650438
0.667316	0.691825	0.679523	0.685115	0.683489	0.549284	0.499201	0.52192	0.574649	0.609904	0.602624	0.661874	0.708101	0.740129	0.725004	0.718567	0.719914	0.612725	0.533437	0.539529	0.631296	0.684185	0.759828	0.796198	0.790281	0.777932	0.767839	0.776831	0.781915	0.785589
0.693186	0.721743	0.686991	0.762122	0.724681	0.551195	0.55013	0.286796	0.639649	0.703998	0.734989	0.740561	0.767426	0.80147	0.77284	0.775356	0.783656	0.694806	0.640663	0.562767	0.741569	0.725034	0.76832	0.771641	0.75515	0.756612	0.790877	0.805232	0.802921	0.809674
0.609944	0.607415	0.640654	0.668873	0.645421	0.600502	0.536098	0.392825	0.510792	0.598478	0.571296	0.61808	0.707785	0.755274	0.754312	0.716463	0.689406	0.65188	0.586888	0.5489	0.678357	0.687071	0.719156	0.758652	0.712784	0.74265	0.764752	0.79697	0.790823	0.807679
0.60736	0.583527	0.607955	0.616144	0.623369	0.611748	0.587495	0.351831	0.440201	0.56006	0.616728	0.637495	0.63953	0.650393	0.647165	0.659449	0.674797	0.677791	0.684472	0.385071	0.500805	0.586289	0.565971	0.569201	0.63859	0.668476	0.691648	0.713442	0.690879	0.701724
0.554101	0.592107	0.611866	0.630856	0.642495	0.639394	0.585921	0.446199	0.446256	0.484427	0.603679	0.621824	0.664987	0.690983	0.69753	0.72546	0.736353	0.725602	0.707642	0.479125	0.472629	0.590607	0.566298	0.575835	0.658263	0.691335	0.721758	0.738406	0.723385	0.739751
0.68194	0.67613	0.662598	0.678417	0.674926	0.655534	0.527878	0.505551	0.521866	0.585776	0.656798	0.683765	0.688555	0.690328	0.66389	0.682208	0.69227	0.689309	0.570387	0.597349	0.627667	0.601154	0.636622	0.678704	0.68655	0.69242	0.680081	0.659754	0.664577	0.650334
0.546387	0.504853	0.500783	0.501019	0.677549	0.529644	0.53672	0.547542	0.525267	NaN	NaN	0.293499	0.640291	NaN	0.492555	0.483802	0.5337	0.552239	0.550065	0.530897	0.52946	NaN	NaN	NaN	NaN	NaN	NaN	NaN	NaN	NaN
0.547436	0.527102	0.520765	0.516724	0.515989	0.528726	0.51682	0.523243	0.516819	0.535357	0.628472	0.546496	0.533062	0.52245	0.503299	0.511897	0.533103	0.535062	0.53858	0.512044	0.495516	0.505987	0.498261	0.497123	0.487047	0.495495	0.491241	0.482358	0.517747	0.479785
0.501768	0.507212	0.486884	0.484453	0.507308	0.502614	0.451972	0.475139	0.471139	0.517061	0.500943	0.470927	0.472417	0.457332	0.449398	0.447775	0.490774	0.465831	0.459559	0.459335	0.49282	0.46177	0.507585	0.463296	0.453599	0.47299	0.46027	0.512921	0.452902	0.526555
0.59435	0.558225	0.549646	0.566701	0.596919	0.586923	0.393756	0.424883	0.504801	0.588244	0.623591	0.638104	0.649748	0.634894	0.638057	0.643322	0.637322	0.609671	0.381601	0.43862	0.640752	0.680449	0.69301	0.697396	0.706461	0.691982	0.697444	0.597937	0.556853	0.525666
0.630832	0.587839	0.583295	0.649016	0.681751	0.654149	0.364529	0.488144	0.629991	0.664788	0.67802	0.668041	0.655853	0.675834	0.670103	0.675456	0.648176	0.647939	0.268988	0.447449	0.620015	0.612681	0.650777	0.694224	0.684151	0.64044	0.561196	0.657805	0.641536	0.651847
0.69653	0.752871	0.765811	0.740227	0.687149	0.769266	NaN	NaN	0.537069	0.690869	0.747673	0.760661	0.742553	0.727456	0.712494	0.7026	0.693937	0.689221	0.417801	0.516215	0.62351	0.662826	0.675584	0.698191	0.708741	0.690553	NaN	NaN	NaN	NaN
0.573155	0.619928	0.634922	0.655535	0.65749	0.569354	0.415504	0.455345	0.557953	0.618465	0.65623	0.663244	0.667839	0.669534	0.666099	0.669032	0.67299	0.470689	0.455588	0.548167	0.635748	0.666996	0.677256	0.679379	0.681264	0.668363	0.672442	0.671981	0.656342	0.662167
0.661463	0.669235	0.659969	0.731344	0.674493	0.468688	0.365344	0.423514	0.652402	0.728093	0.728825	0.743286	0.760115	0.760029	0.759811	0.763773	0.744502	0.45507	NaN	0.589582	0.659482	0.710945	0.732626	0.720897	0.704597	0.721375	0.76233	0.768133	0.768609	0.768006
0.644229	0.653783	0.653838	0.665792	0.657994	0.649377	0.460688	0.580395	0.630449	0.664827	0.672028	0.679875	0.67159	0.671136	0.68552	0.685647	0.684657	0.470982	0.516094	0.623652	0.667183	0.679933	0.691482	0.692822	0.694499	0.694935	0.691639	0.688845	0.689697	0.692219
0.649261	0.649265	0.646781	0.648771	0.690629	0.671493	0.470878	0.476997	0.551814	0.638764	0.651627	0.657235	0.693757	0.700771	0.690455	0.684852	0.688136	0.465436	0.467234	0.553596	0.646982	0.665254	0.667861	0.675824	0.682095	0.689191	0.706497	0.704301	0.704162	0.706313
0.0868211	0.0561829	0.053759	0.0728838	0.0557464	0.162123	0.442203	0.360652	0.485344	0.58209	0.612136	0.691386	0.663517	0.713507	0.725019	0.717316	0.732716	0.581966	0.454896	0.458951	0.546928	0.602776	0.730326	0.749088	0.72115	0.716767	0.787952	0.797946	0.791723	NaN
0.0509336	0.0623619	0.0646641	0.0851243	0.0676954	0.127691	0.0734623	0.103883	NaN	0.0934343	0.136015	0.0885113	0.108219	0.074549	NaN	NaN	0.113641	0.106685	0.107336	0.121981	0.134598	0.128199	0.112881	0.146068	0.0789961	0.0865631	0.0934987	0.0758678	0.0590038	0.0794021
NaN	NaN	NaN	NaN	NaN	NaN	0.719621	0.341594	NaN	NaN	NaN	NaN	0.141807	0.10103	0.100648	NaN	0.089394	0.0861975	0.0906699	0.122232	0.135761	0.129022	0.112897	NaN	0.0891969	0.0882895	0.0794609	0.0705043	0.055429	NaN
NaN	0.47664	0.61613	0.524313	0.512299	0.607914	NaN	NaN	0.49296	0.473786	0.452727	0.465059	0.465633	0.467529	0.46964	0.455486	0.463868	0.497013	0.479466	0.479187	0.476139	0.450865	0.436929	0.448698	0.434409	0.442962	0.698663	0.659041	0.604038	NaN
0.488446	0.440654	0.485406	0.474475	0.494984	0.455231	0.506325	0.471441	NaN	NaN	NaN	0.431573	NaN	NaN	0.341806	NaN	NaN	0.235481	0.648888	NaN	0.480249	0.61889	0.551885	NaN	0.294247	0.288724	0.509442	0.519611	0.517044	0.299727
0.483527	0.496986	0.55627	0.581666	0.58068	0.376586	0.17325	0.18537	0.298568	0.537232	0.619834	0.617216	0.611002	0.631164	0.639016	0.674514	0.669226	0.303775	0.373026	0.448454	0.448678	0.651054	0.687818	0.674761	0.675631	0.701713	0.737839	0.706587	0.696532	0.701426
0.735434	0.730133	0.68932	0.714928	0.674969	0.487369	0.481524	0.511677	0.555033	0.631139	0.66936	0.679207	0.689665	0.679401	0.688473	0.700456	0.709268	0.733913	0.50868	0.499454	0.583077	0.666925	0.706726	0.729791	0.729102	0.745374	0.740774	0.739923	0.720928	0.737542
0.751559	0.756656	0.719366	0.74988	0.721883	0.491143	0.484221	0.511156	0.568984	0.651754	0.700078	0.714039	0.735492	0.740681	0.760722	0.75996	0.767554	0.788653	0.512867	0.509766	0.595741	0.703601	0.758831	0.781021	0.78585	0.787622	0.787971	0.784097	0.768095	0.775462
NaN	NaN	NaN	NaN	NaN	NaN	NaN	NaN	NaN	NaN	NaN	NaN	NaN	NaN	NaN	NaN	NaN	NaN	NaN	NaN	0.572919	0.641777	0.663365	0.629928	0.642296	0.656463	0.665056	0.667224	0.66606	0.653964
0.127686	0.191359	0.314219	0.3168	0.227485	0.306064	0.213348	0.236249	0.173284	0.204161	0.184885	0.239456	0.230141	0.149436	0.146066	0.163326	NaN	0.203369	0.180534	0.179933	0.194879	0.273054	0.184347	0.269895	NaN	0.232155	NaN	0.190702	0.202347	0.164631
0.116973	0.215902	0.339681	0.315117	0.22155	0.299788	0.20982	0.236809	0.164017	0.186037	0.167439	0.244209	0.223951	0.111571	0.141775	0.149458	NaN	NaN	NaN	0.178551	0.195985	0.256137	0.183045	0.256025	0.169909	NaN	0.178815	0.190193	0.202014	0.164152
0.420462	0.530981	0.0784736	0.148476	0.0631182	0.112201	0.0692861	0.0635721	0.428064	0.418434	0.426275	0.313272	0.376086	0.461584	0.453978	0.421641	0.405524	0.43738	0.476404	0.412319	0.329176	0.39087	0.398346	0.443438	0.426277	0.380696	0.393718	0.395565	0.429438	0.372931
0.471772	0.480218	0.0995444	0.147714	0.0802881	0.11498	0.0767634	0.0768234	0.0622153	0.356171	0.264573	0.276891	0.321449	0.372194	0.412023	0.380551	0.347409	0.318394	0.411288	0.384796	0.279899	0.343356	0.318711	0.44558	0.38598	0.335246	0.294611	0.346448	0.350375	0.313557
0.4031	0.554796	0.405103	0.523941	0.554318	NaN	0.0822165	0.0772056	0.200501	NaN	0.10752	0.43449	0.525819	0.603001	0.621347	0.651112	0.666162	0.541732	0.633311	0.12477	0.107664	0.547116	0.260321	0.516741	0.494355	0.57252	0.731496	0.749915	NaN	0.580484
0.668778	0.668026	0.671151	0.685927	0.683675	0.698624	0.654007	NaN	0.473997	0.590061	0.677026	0.668719	0.698288	0.733275	0.729424	0.722791	0.758759	0.723317	0.720418	0.629242	0.580442	0.709699	0.747241	0.770292	0.758244	0.741987	0.74638	0.764782	0.757005	0.745708
0.688492	0.702448	0.711077	0.729968	0.716758	0.72638	0.671857	0.460644	0.511318	0.60629	0.686679	0.691235	0.732209	0.758835	0.758752	0.743909	0.764891	0.74155	0.741827	0.65196	0.596969	0.730372	0.761956	0.780791	0.786308	0.77003	0.775391	0.789027	0.785607	0.785238
0.137634	0.160623	0.197826	0.232582	0.160959	0.17669	0.171047	0.115104	0.108192	0.107606	0.154092	0.098048	0.109022	0.0988473	0.752544	0.709105	0.727949	0.713966	0.746868	0.686345	0.473945	0.614546	0.69544	0.630598	0.637529	0.617081	0.536489	0.421311	0.260269	0.222866
0.484664	0.595115	0.658192	0.719191	0.605934	0.631004	0.251037	0.324063	0.390496	0.354869	0.572843	0.714267	0.747821	0.760448	0.783902	0.781926	0.760756	0.773582	0.52811	0.28243	0.352445	0.555587	0.654122	0.716667	0.739254	0.731314	0.717012	0.695854	0.728354	0.724925
0.704706	0.736962	0.774831	0.747026	0.783128	0.770974	0.761939	0.701233	0.598509	0.744864	0.752109	0.787319	0.771338	0.762918	0.763249	0.758155	0.776641	0.793816	0.796667	0.783774	0.668597	0.742971	0.723346	0.713958	0.733298	0.743533	0.753859	0.767192	NaN	NaN
0.525406	0.625344	0.712465	0.699366	0.716849	0.678322	0.109538	0.0564799	0.0562864	0.108409	0.343023	0.562388	0.668184	0.6969	0.67457	0.762473	0.714105	0.692397	0.76812	0.250475	0.148176	0.328876	0.531125	0.605486	0.706689	0.649928	0.613721	0.662872	0.487431	0.476586
0.462002	0.628614	0.661836	0.755001	0.744461	0.355027	0.405243	0.533468	0.522066	0.587768	0.657716	0.738134	0.752489	0.763117	0.772474	0.771754	0.788264	0.767179	0.750945	0.564929	0.584257	0.666798	0.748895	0.756783	0.787218	0.772893	0.742401	0.785172	0.750984	0.770056
0.580196	0.688516	0.669647	0.690667	0.720643	0.618688	0.239707	0.345349	0.413349	0.475172	0.614475	0.721882	0.785146	0.787396	0.776209	0.770806	0.766571	0.74657	0.774896	0.279529	0.50723	0.622125	0.633935	0.688555	0.744972	0.789475	0.733303	0.63812	0.68607	0.690679
0.640991	0.704621	0.696696	0.721013	0.710602	0.535535	0.394608	0.432005	0.477175	0.534612	0.611447	0.734603	0.76494	0.755578	0.750454	0.77134	0.730222	0.741363	0.735163	0.690163	0.50658	0.68483	0.752138	0.74821	0.741976	0.739305	0.768066	0.766839	0.759048	0.783092
0.70656	0.704979	0.676548	0.687527	0.677912	0.535174	0.381666	0.345842	0.535643	0.650664	0.690828	0.728351	0.745496	0.720173	0.729339	0.749252	0.755806	0.792321	0.727559	0.429541	0.598918	0.668633	0.700079	0.753047	0.769979	0.7417	0.744341	0.724419	0.719803	0.752801
NaN	0.291182	0.381366	0.13147	0.159846	0.110699	0.0611868	0.135922	0.191968	0.302719	0.224745	0.345054	0.282248	0.301106	0.440574	0.636511	0.655536	0.505049	0.137135	0.129541	0.0517161	0.0682396	0.0591366	0.0955219	0.0560559	0.0598065	0.154292	0.677993	0.0772578	0.0919813
0.681515	0.694064	0.674675	0.690035	0.688025	0.680026	0.56641	0.479715	0.529065	0.595001	0.664352	0.710272	0.723979	0.735455	0.731695	0.741734	0.744738	0.743842	0.73304	0.718218	0.517606	0.578396	0.67135	0.703348	0.699831	0.720906	0.719869	0.73575	0.730618	0.738919
0.597749	0.62454	0.641949	0.657446	0.64571	0.614483	0.63535	0.527538	0.523273	0.552728	0.62361	0.566431	0.618795	0.616937	0.604075	0.630303	0.621806	0.638894	0.624374	0.468238	0.527819	0.656022	0.666397	0.615226	0.578419	0.597147	0.619577	0.612702	0.661092	0.636333
0.585253	0.610811	0.617857	0.641611	0.639201	0.639467	0.65293	0.581136	0.583419	0.593174	0.616999	0.635483	NaN	0.647236	0.683167	0.693463	0.649862	0.697867	0.663853	0.602385	0.623662	0.642453	0.66335	0.683181	0.657983	0.66962	0.687897	0.69906	0.673186	0.705292
0.615656	0.629958	0.643775	0.66923	0.671314	0.681024	0.692	0.467283	0.51088	0.601577	0.635508	0.627033	0.664472	0.666845	0.675516	0.689019	0.698814	0.684733	0.586887	0.504242	0.607313	0.635257	0.598892	0.657434	0.686933	0.713433	0.701687	0.697395	0.581341	0.634787
0.56018	0.581877	0.584647	0.592159	0.631982	0.637815	0.622765	0.446171	0.434626	NaN	NaN	0.607122	0.591155	0.622087	0.631636	0.59516	0.61032	0.559496	0.575161	0.515561	0.513215	0.50308	0.555947	0.588633	0.605674	0.606317	0.62596	0.66452	0.659305	0.627697
0.570261	0.584886	0.576163	0.590339	0.601457	0.598174	0.603316	0.50119	0.473075	0.501927	0.557723	0.58451	0.57274	0.596948	0.613782	0.565346	0.614757	0.555121	0.553424	0.481263	0.457729	0.525045	0.530667	0.562628	0.590172	0.571872	0.608658	0.622606	0.601934	0.607293
0.665881	0.713003	0.669362	0.694483	0.706751	0.73221	0.764969	0.532176	0.505131	0.546427	0.66783	0.68715	0.729361	0.718278	0.748685	0.755005	0.781419	0.761218	0.602262	0.566781	0.66763	0.711953	0.711379	0.766633	0.776021	0.769261	0.759791	0.79326	0.770293	0.704426
0.658711	0.669934	0.665449	0.710477	0.698114	0.725166	0.668742	0.629949	0.461554	0.574629	0.667861	0.65304	0.675192	0.684459	0.689672	0.706817	0.698821	0.691218	0.523732	0.57658	0.647184	0.700245	0.70304	0.739196	0.761918	0.779679	0.774624	0.750807	0.783406	0.682588
0.655928	0.672575	0.661529	0.670806	0.679124	0.677856	0.675181	NaN	0.554999	0.569345	0.614774	0.668178	0.68952	0.701181	0.706998	0.713538	0.737254	0.730442	0.565602	0.62271	0.53879	0.613423	0.687561	0.722784	0.723378	0.732688	0.73255	0.744459	0.735338	0.744768
0.633706	0.641032	0.68145	0.705983	0.711428	0.71163	0.684831	0.602952	0.554933	0.588787	0.651819	0.67162	0.696978	0.685489	0.689286	0.720777	0.722027	0.715669	0.498025	0.567481	0.587295	0.602053	0.68221	0.709104	0.701658	0.702445	0.704947	0.708589	0.610727	0.685833
0.591107	0.593153	0.673446	0.693339	0.652882	0.689671	0.707157	0.695941	0.558171	0.625797	0.677059	0.692027	0.704433	0.708874	0.697116	0.706979	0.719948	0.700673	NaN	0.593921	0.662816	0.685381	0.687431	0.692108	0.682533	0.698983	0.694488	0.715111	0.704042	0.671025
0.638454	0.632187	0.671842	0.693878	0.725408	0.743613	0.729714	0.654138	0.6081	0.65449	0.67915	0.72825	0.75007	0.758353	0.717832	0.751834	0.752304	0.547762	0.512353	0.643956	0.71032	0.744785	0.76551	0.730428	0.719455	0.731252	0.738364	0.751884	0.695286	0.741522
0.628564	0.594698	0.642045	0.646923	0.641864	0.675396	0.687492	0.645604	0.531619	0.530342	0.576018	0.679152	0.690163	0.685138	0.675975	0.674782	0.688615	0.68169	0.418997	NaN	0.585036	0.648514	0.712107	0.703543	0.688297	0.688841	0.666117	0.693176	0.706186	0.669727
0.460965	0.608272	0.652881	0.656421	0.635879	0.69204	0.676534	0.646396	NaN	0.55003	0.590122	0.639301	0.641804	0.660243	0.673034	0.665193	0.653534	0.434344	NaN	0.522095	0.442674	0.579037	0.689763	0.711831	0.708082	0.717562	0.703677	0.694634	0.671508	0.644691
0.682432	0.669265	0.737758	0.745863	0.720934	0.731815	0.725596	0.537779	0.554902	0.590438	0.671134	0.673141	0.744449	0.753525	0.754724	0.71799	0.723788	0.740944	0.640679	0.626956	0.698731	0.734853	0.747325	0.744267	0.693435	0.744911	0.739706	0.747629	0.730554	0.665904
0.722878	0.747868	0.714642	0.73822	0.749004	0.738601	0.742026	0.754439	0.465283	0.612361	0.660886	0.707013	0.716471	0.735581	0.77494	0.803311	0.790184	0.80133	0.822981	0.810056	0.718601	0.746312	0.779359	0.793065	0.802322	0.763567	0.745856	0.774097	0.785884	0.816335
0.674076	0.703912	0.707894	0.641155	0.671307	0.703324	0.489824	NaN	NaN	NaN	0.62323	0.670048	0.70263	0.704493	0.720006	0.722716	0.73743	0.713859	0.714475	0.705439	0.496337	0.629636	0.689148	0.705747	0.716644	0.729365	0.716263	0.730395	0.730905	0.743274
0.662445	0.610436	0.647278	0.668296	0.676408	0.682612	0.478787	0.462253	0.499306	0.567374	0.655806	0.690145	0.701055	0.727818	0.696248	0.725316	0.737519	0.736059	0.730349	0.603604	NaN	0.378808	0.390071	0.514146	NaN	0.684187	0.676253	0.703395	0.703924	0.694457
0.467768	0.289611	0.446999	0.455886	0.588847	0.546591	0.524922	0.474206	0.516965	0.584027	0.632829	0.659277	0.604298	0.613111	0.665879	0.666937	0.686336	0.411901	0.671626	0.377193	0.275486	0.455528	0.475136	0.30553	0.566181	0.563811	0.549329	0.546667	0.588086	0.589263
0.140059	0.225088	0.299032	0.291161	0.177716	0.102334	0.0412671	0.0456096	0.0470345	0.0772614	0.167628	NaN	0.589451	0.631121	0.659009	NaN	0.664448	0.579405	0.51012	0.192037	0.0711909	0.243495	0.524444	0.615595	0.578502	NaN	0.411087	0.402359	0.490476	0.395777
0.142338	0.223523	0.303307	0.31207	0.197486	0.10613	0.0382212	0.0468956	0.046612	0.0745589	0.177551	0.368066	0.572667	0.633067	0.663452	0.64102	0.675524	0.590751	0.492135	0.187137	0.0671692	0.243153	0.523214	0.627338	0.57421	0.505458	0.393659	0.386716	0.473248	0.395254
0.691153	0.747833	0.744111	0.716188	0.719073	0.687691	0.293319	0.288755	0.460066	0.634179	0.614705	0.604254	0.687441	0.747559	0.73081	0.691747	0.640702	0.615124	0.59408	0.622836	0.520835	0.538689	0.576429	0.629647	0.604567	0.607836	0.589111	0.620184	0.606476	0.581589
0.692162	0.667361	0.740806	0.760406	0.75737	0.779021	0.729215	0.523472	0.514988	0.557173	0.693913	0.756057	0.773124	0.781316	0.762303	0.765057	0.75979	0.775576	0.760663	0.775584	0.752421	0.564827	0.750528	0.770341	0.758814	0.757851	0.742854	0.767655	0.769311	0.765834
0.5913	0.689194	0.727463	0.730406	0.732349	0.713552	0.70367	0.35123	0.539249	0.680637	0.704475	0.74495	0.744794	0.755858	0.744343	0.737654	0.738648	0.744599	0.737319	0.73046	0.725443	0.58889	0.681343	0.746531	0.766604	0.76818	0.754936	0.770246	0.769624	0.749253
0.232223	0.22755	0.188748	0.166595	0.144341	0.141081	0.172636	0.142521	0.194597	0.158113	0.118863	0.101774	0.142672	0.275386	0.174469	0.244971	0.284172	0.295066	0.216497	0.235718	NaN	0.326878	0.294836	NaN	0.418827	0.0919849	0.0354251	0.105156	0.0860955	0.145651
0.0987321	0.0931979	0.0933713	0.0816594	0.0893601	0.0662547	0.100515	0.0697218	0.0776968	0.0697333	0.0694004	0.0840566	0.0946651	0.10466	0.0793737	0.0766234	0.118672	0.139567	0.0694523	0.0972933	0.108492	0.0830891	0.0434703	0.0658253	0.0676828	0.0877967	0.0770608	0.0901485	0.0776693	0.0766276
0.625691	0.635504	0.642724	0.657211	0.645744	0.481093	0.509646	0.508698	0.540207	0.634522	0.651984	0.644013	0.688345	0.711628	0.71841	0.724188	0.731555	0.714452	0.485745	0.509917	0.590551	0.650306	0.669519	0.671496	0.662	0.656616	0.686309	0.711761	0.672823	0.684826
0.606122	0.639875	0.657344	0.636108	0.649326	0.480999	0.163356	0.105155	0.0680295	0.189522	0.298851	0.36968	0.422032	0.50595	0.520169	0.459721	0.500942	0.485838	0.408859	0.158094	0.191669	0.302438	0.307213	0.289875	0.329017	0.328255	0.309839	0.401906	0.444945	0.41237
0.612005	0.524822	0.284215	0.199114	0.340596	0.144655	0.10072	0.084393	0.109342	0.130133	0.328539	0.272901	0.348407	0.293732	0.487278	0.273045	0.585012	0.128497	0.096327	0.152082	0.220159	0.105824	0.149036	NaN	0.356266	0.466436	0.598671	0.452862	0.457032	0.296947
0.612543	0.529309	0.288436	0.19865	0.34834	0.153839	0.110193	0.0807515	0.108678	0.138774	0.241838	0.201017	0.237202	0.320863	0.315413	0.363477	0.461113	0.235762	0.194523	0.221696	0.299902	0.382704	0.439949	0.445835	0.422379	0.3982	0.393175	0.433321	0.449757	0.446979
0.617831	0.639483	0.630769	0.633811	0.613135	0.438037	0.493136	0.476943	0.491969	0.618845	0.63327	0.630679	0.666502	0.695337	0.701392	0.705937	0.701614	0.696538	0.486322	NaN	0.596039	0.652238	0.661695	0.680142	0.659907	0.66186	0.688032	0.703152	0.677155	0.679327
0.368844	0.281264	0.0989248	0.342729	0.446416	0.352756	0.0943988	0.145972	0.21607	0.458336	0.504262	0.539747	0.569112	0.579041	0.576613	0.541811	0.572601	0.581067	0.55848	0.511098	0.303385	0.43473	0.467508	0.513892	0.571079	0.507125	0.539024	0.529091	0.597315	0.576338
0.209372	0.524128	0.639013	0.665305	0.553305	0.213497	0.147049	0.229855	0.382598	0.477517	0.462831	0.680408	0.686071	0.683404	0.709823	0.718608	0.685838	0.706877	0.368852	0.685499	0.332183	0.442956	0.485671	0.534861	0.466706	0.447038	0.455893	0.493288	0.489962	0.521631
0.750572	0.723336	0.723355	0.741884	0.735731	0.500125	0.318426	0.395412	0.581236	0.805403	0.808799	0.662807	0.673719	0.669462	0.668568	0.696481	0.685473	0.643394	0.59445	0.578642	0.57128	0.595283	0.600329	0.562616	0.562181	0.552909	0.445118	0.54821	0.53604	0.53768
0.688165	0.755205	0.763655	0.745578	0.726146	0.744545	0.730679	0.433711	0.542462	0.6137	0.576773	0.680445	0.726019	0.715766	0.706644	0.713615	0.700329	0.703637	0.710586	0.712434	0.37437	0.575716	0.666818	0.692151	0.689198	0.67777	0.680844	0.701677	0.678517	0.694328
0.711701	0.764303	0.769921	0.730439	0.733976	0.742142	0.717265	0.405691	0.495415	0.582223	0.6281	0.776505	0.814949	0.816084	0.805329	0.796429	0.812927	0.838363	0.840827	0.824794	0.584083	0.798246	0.830285	0.83699	0.8291	0.833737	0.827469	0.849675	0.832834	0.842165
0.746829	0.697407	0.647763	0.707067	0.721174	0.64458	0.137077	0.228566	0.676853	0.786606	0.8195	0.808136	0.822841	0.813386	0.81786	0.797017	0.803928	0.115771	0.130359	0.185162	0.638232	0.759245	0.790242	0.774831	0.839671	0.793368	0.829157	0.803787	0.799086	0.799173
0.75674	0.73989	0.225395	0.667234	0.749609	0.802197	0.111372	0.242572	0.552459	0.729368	0.767982	0.732249	0.739256	0.707763	0.734903	0.72262	0.722696	0.140977	0.124413	0.14091	0.606519	0.752845	0.782972	0.806885	0.802875	0.761851	0.820268	0.785541	0.833985	0.760641
0.703453	0.736895	0.720168	0.750432	0.730172	0.49803	0.271778	0.331691	0.564563	0.801403	0.824947	0.844242	0.776065	0.763793	0.722899	0.522473	0.461782	0.636726	0.570369	NaN	0.712587	NaN	0.82654	0.740691	0.651788	0.657422	NaN	NaN	0.716513	0.792685
0.4437	0.599635	0.384735	NaN	0.42811	NaN	0.377988	0.524372	0.291289	0.650715	0.672991	NaN	0.791399	0.753479	0.594603	0.524806	0.824539	0.437444	0.0754782	0.313991	0.524831	0.5444	0.520932	0.475613	0.435733	0.500394	0.430181	0.485282	0.474291	0.459191
0.760142	0.744564	0.789746	0.667122	0.77575	0.8159	0.0948493	0.216696	0.640577	0.782547	0.805424	0.816592	0.840488	0.843738	0.850326	0.857728	0.846619	0.184444	0.198955	0.571797	0.78906	0.790861	0.771517	0.777225	0.780157	0.809272	0.825101	0.797675	0.802423	0.815983
0.842619	0.788091	0.703039	0.732106	0.734928	0.778141	0.1212	0.150774	0.389353	0.679582	0.752883	0.763348	0.771988	0.8232	0.802417	0.797449	0.823715	0.158333	0.201758	0.251078	0.761439	0.805498	0.820761	0.827814	0.861956	0.837724	0.837253	0.818491	0.80133	0.806373
0.717561	0.729141	0.682048	0.62807	0.636056	0.666474	0.124844	0.0946228	0.324236	0.731545	0.782329	0.803143	0.791664	0.828127	0.838058	0.820411	0.792721	0.275472	0.318209	0.572401	0.742982	0.716933	0.730977	0.738844	0.731611	0.713446	0.734603	0.729009	0.728815	0.725244
0.449901	0.502005	0.419079	0.313572	0.474577	0.435038	0.590457	0.506815	0.293799	NaN	0.393875	0.447177	0.71364	0.714341	0.715768	0.778429	0.627528	0.465695	0.449755	0.595155	0.662975	0.63907	0.561734	0.334788	0.517121	0.596551	0.289713	0.591286	0.300082	NaN
0.507481	0.328518	0.303957	0.299421	0.41326	0.420246	0.351068	0.364886	0.403326	0.512216	0.483625	0.65325	0.762867	0.764958	0.684896	0.752826	0.759719	0.463946	0.31608	0.565082	0.660396	0.78192	0.650726	0.564736	0.67336	0.71104	0.753582	0.705242	0.685739	0.668648
0.465747	0.305697	0.243116	0.369428	0.481107	0.399308	0.205819	0.215297	0.358918	0.508725	0.511893	0.531285	0.559616	0.525401	0.537601	0.54229	0.545989	0.383383	0.422016	0.416265	0.525224	0.486053	0.456528	0.513503	0.561288	0.510841	0.5481	0.515744	0.520589	0.541814
NaN	0.622945	0.43176	0.418551	0.467754	0.451162	0.622767	0.524536	0.444567	0.43559	0.396013	0.609974	0.692216	0.663796	0.742235	0.730645	0.702871	0.322281	0.282666	0.464053	0.629055	0.714886	0.773024	0.641702	NaN	NaN	NaN	NaN	NaN	NaN
0.430288	0.53318	0.681441	0.671427	0.707203	0.443382	0.167532	0.226061	0.428331	0.463455	0.686753	0.771528	0.8197	0.792183	0.784847	0.77496	0.758344	0.738718	0.215663	0.242339	0.468866	0.576321	0.659769	0.736339	0.708682	0.702726	0.70444	0.713638	0.693123	0.723144
0.481714	0.543355	0.591984	0.603575	0.602634	0.467487	0.411056	0.375937	0.403527	0.574887	0.523336	0.776203	0.805318	0.772443	0.784452	0.778756	0.786691	0.760882	0.211692	0.242584	0.469054	0.520774	0.601174	0.734131	0.7215	0.691861	0.685498	0.657636	0.639673	0.748156
0.757139	0.694781	0.727732	0.732057	0.656619	0.386748	0.32992	0.418335	0.574781	0.563158	0.737674	0.844371	0.834893	0.822866	0.807274	0.793209	0.76118	0.765088	0.398492	0.445493	0.646893	0.711815	0.738907	0.744157	0.778786	0.76851	0.760347	0.781656	0.769296	0.784849
0.74259	0.687584	0.711903	0.719753	0.643929	0.382945	0.309627	0.42338	0.56321	0.548268	0.676189	0.716158	0.796392	0.800441	0.77692	0.766562	0.755992	0.738076	0.437269	0.449058	0.611345	0.689197	0.69185	0.706801	0.724202	0.720766	0.699061	0.7199	0.697191	0.677085
0.582301	0.542004	0.613399	0.647446	0.545711	0.450941	0.347996	0.402932	0.516666	0.602921	0.64233	0.698853	0.704468	0.690158	0.708606	0.721253	0.725479	0.718353	0.355239	0.347627	0.539057	0.60856	0.573828	0.667788	0.704416	0.726946	0.700891	0.673954	0.683999	0.669022
NaN	NaN	0.351947	0.18191	0.124876	0.0870536	0.14611	0.176082	0.192977	0.387883	0.314823	0.394561	0.466319	0.681852	0.700719	0.655468	0.691712	0.382338	0.0759286	0.24544	0.14301	0.141042	0.164756	0.26476	0.344471	0.355649	0.266145	0.41843	0.527917	0.35558
0.266683	0.519197	0.356	0.163317	0.116951	0.0888191	0.133576	0.175907	0.191309	0.387987	0.301538	0.398443	0.562118	0.713448	0.699064	0.590739	0.705475	0.387966	0.071726	0.266033	0.15528	0.163266	0.181307	0.296525	0.401899	0.370665	0.266145	0.478128	0.523096	0.37454
0.156183	NaN	0.521269	0.478429	0.538499	0.220565	0.213645	0.300957	0.142487	0.182168	0.499401	0.615222	0.672975	0.688155	0.692556	0.724053	0.748409	0.776101	0.676038	0.133213	0.284046	NaN	0.650491	0.548121	0.572757	0.462987	0.426876	0.531184	0.543832	0.624319
0.626837	0.715704	0.734875	0.756644	0.775378	0.73102	0.267311	0.248824	0.343406	0.726939	NaN	0.790693	0.815111	0.769846	0.827302	0.800484	0.818205	0.812754	0.842174	0.604681	0.451277	0.733095	0.793338	0.79278	0.788682	0.82714	0.74042	0.793426	0.754466	0.776939
0.651188	0.371231	0.528726	0.583715	0.54688	0.298955	0.193398	0.2378	0.18408	0.0988677	0.249168	0.415143	0.535973	0.715975	0.750095	0.777485	0.785823	0.790127	0.510023	0.174383	0.364965	0.570575	0.67276	0.714666	0.748018	0.746199	0.738322	0.731951	0.682646	0.710911
0.665098	0.389108	0.584524	0.510146	0.553849	0.298881	0.185425	0.241202	0.163578	0.0983793	0.254288	0.415143	0.566642	0.718229	0.75091	0.764837	0.784054	0.773386	0.514468	0.189188	0.376704	0.565835	0.675097	0.714029	0.746015	0.75143	0.738659	0.734153	0.674076	0.696718
0.705427	0.652406	0.631867	0.652759	0.517981	0.58034	0.242824	0.220895	0.592504	0.516379	0.691961	0.7559	0.731673	0.765116	0.819173	0.778177	0.81584	0.772556	0.788089	0.343452	0.506927	0.630453	0.756849	0.745268	0.73678	0.798334	0.817975	0.78046	0.783043	0.765083
0.664204	0.674932	0.668042	0.682167	0.677618	0.666015	0.548383	0.454304	0.518413	0.614429	0.658301	0.668838	0.682406	0.690388	0.699816	0.702356	0.695636	0.69543	0.692728	0.694228	0.612898	0.556277	0.644502	0.682542	0.688444	0.699863	0.69564	0.688282	0.691794	0.698775
0.66175	0.664241	0.662304	0.671767	0.665851	0.659804	0.550092	0.454701	0.521036	0.612092	0.653934	0.655562	0.666535	0.669771	0.680344	0.6835	0.686605	0.69543	0.687175	0.699799	0.616663	0.555351	0.643317	0.674147	0.673231	0.692379	0.689154	0.68555	0.689833	0.697444
0.769939	0.775238	0.775572	0.756892	0.747806	0.752752	0.727178	0.458297	0.557116	0.710491	0.755599	0.767003	0.763639	0.739725	0.742659	0.763247	0.733334	0.736223	0.727359	0.727179	0.710392	0.721796	0.712274	0.724763	0.732613	0.731639	0.711399	0.752493	0.74879	0.744278
0.697253	0.687686	0.691155	0.689859	0.689378	0.691785	0.67977	0.684172	0.466073	0.631226	0.684876	0.695391	0.696428	0.69058	0.692468	0.692697	0.6952	0.702352	0.671961	0.605356	0.639628	0.607368	0.653882	0.67208	0.683501	0.674871	0.674261	0.660822	0.669272	0.678738
0.600949	0.575912	0.672094	0.677633	0.68986	0.689706	0.660824	0.584512	0.450027	0.508874	0.598756	0.621698	0.652918	0.713858	0.719932	0.713363	0.72969	0.684107	0.683227	0.638979	0.61033	0.598763	0.647264	0.672362	0.690394	0.696016	0.701761	0.672469	0.704252	0.696008
0.494701	0.487266	0.500566	0.516622	0.506629	0.469724	0.490543	0.486956	0.47151	0.399269	0.55961	0.536068	0.529626	NaN	NaN	NaN	0.626129	NaN	0.535572	0.552049	0.512039	0.457402	0.449209	0.490752	0.472782	0.554138	0.598081	0.621427	0.694221	0.654393
0.494701	0.487266	0.500566	0.516622	0.506629	0.469724	0.490543	0.486956	0.47151	0.399269	0.55961	0.536068	0.529626	NaN	NaN	NaN	0.626129	NaN	0.581973	0.57377	0.474607	0.532467	0.506439	0.498986	0.571671	0.562964	0.535346	0.60184	0.630837	0.639037
0.496399	0.546765	0.612543	0.616944	0.596195	0.485333	0.207376	0.150707	0.119695	0.396091	0.38646	0.387816	0.522932	0.563049	0.42237	0.503306	0.60771	0.593115	0.640411	0.329238	0.158158	0.177219	0.250068	0.340039	0.454183	0.542929	0.562897	0.601453	0.631072	0.627703
0.649069	0.685149	0.704065	0.705863	0.721466	0.72568	0.717038	0.417914	0.53732	0.658572	0.636739	0.680845	0.731379	0.739793	0.750544	0.753462	0.755476	0.74278	0.711506	0.596417	0.695731	0.699954	0.642806	0.703443	0.724518	0.75535	0.752841	0.747102	0.730319	0.730743
0.517479	0.639174	0.676537	0.683469	0.698373	0.683242	0.658157	0.505665	0.491567	0.636091	0.673469	0.711389	0.714748	0.711741	0.722796	0.727006	0.733762	0.733389	0.7287	0.617117	0.589291	0.651581	0.6491	0.658265	0.716845	0.727932	0.747401	0.761883	0.765161	0.767958
0.65686	0.668034	0.737457	0.729824	0.768132	0.758552	0.756475	0.424504	0.583313	0.553535	0.518996	0.6182	0.676691	0.675925	0.701513	0.709282	0.721878	0.698534	0.649357	0.641942	0.627615	0.430929	0.549392	0.637555	0.664835	0.693469	0.702859	0.69963	0.704632	0.714874
0.576755	0.512855	0.695428	0.73855	0.771057	0.763098	0.744335	0.135633	0.121011	0.313381	0.366407	0.594355	0.646105	0.648769	0.686075	0.68303	0.696084	0.68482	0.625514	0.607007	0.578986	0.424197	0.528537	0.622428	0.628422	0.689588	0.685259	0.674334	0.693361	0.699202
0.744205	0.649533	0.681634	0.620868	0.690033	0.666841	0.690492	0.150444	0.179018	0.305574	0.394183	0.484843	0.726648	0.734313	0.743838	0.73406	0.746731	0.732226	0.723427	0.664404	0.667047	0.640353	0.686169	0.718091	0.737474	0.738657	0.742587	0.714727	0.71509	0.729005
0.738532	0.737501	0.728847	0.732631	0.732265	0.739369	0.740312	0.721225	0.493526	0.66005	0.720459	0.740276	0.745903	0.742884	0.64931	0.653694	0.65089	0.732632	0.717314	0.655459	0.660872	0.636876	0.692645	0.712722	0.731387	0.737052	0.739382	0.710434	0.722759	0.725867
0.750182	0.612972	0.736575	0.732443	0.73486	0.750479	0.703911	0.561571	0.627678	0.515326	0.6426	0.727681	0.742294	0.760603	0.764236	0.749386	0.762166	0.770376	0.743686	0.742519	0.727138	0.577622	0.669221	0.713624	0.64437	0.639244	0.692596	0.657728	0.703652	0.714781
0.805711	0.596951	0.744211	0.734548	0.752051	0.76727	0.699542	0.613259	0.649923	0.517092	0.682912	0.744415	0.743866	0.721974	0.700938	0.712173	0.745255	0.714793	0.71086	0.711503	0.680529	0.621946	0.637151	0.667913	0.703001	0.718124	0.728094	0.700526	0.703014	0.700821
0.762073	0.776464	0.810203	0.792722	0.775038	0.791993	0.741664	0.630812	0.369714	0.625228	0.744017	0.7949	0.782485	0.772419	0.776953	0.764231	0.767362	0.79106	0.78819	0.790622	0.789492	0.634834	0.671991	0.748731	0.765911	0.771556	0.780457	0.793038	0.77434	0.760754
0.477772	0.570002	0.678611	0.743792	0.72081	0.731648	0.747998	0.0910972	0.0985107	0.225087	0.671893	0.649121	0.662653	0.746076	0.719161	0.735687	0.696744	0.671695	0.695514	0.630772	0.705973	0.122493	0.269212	0.676112	0.717529	0.789219	0.733563	0.739924	0.707366	0.770135
0.467795	0.568738	0.684521	0.75493	0.746106	0.764452	0.751143	0.0778103	0.103485	0.219576	0.682136	0.653697	NaN	0.750973	NaN	0.75151	0.694125	0.683329	0.699067	0.637891	NaN	0.127509	0.258387	0.685911	0.696725	0.772962	0.739773	0.735924	0.726559	0.773223
0.108806	0.0946603	NaN	0.0852409	0.0718446	0.0971441	0.100188	0.139275	0.101756	0.116008	0.0959063	0.151577	NaN	NaN	NaN	NaN	NaN	0.080765	0.1095	0.0805065	0.107854	0.0786795	0.112437	0.0733325	NaN	0.157333	NaN	NaN	0.0660535	0.0799691
NaN	0.0908281	NaN	NaN	0.0717433	NaN	0.10078	0.0770269	NaN	NaN	0.14966	NaN	NaN	0.163194	0.0654519	0.144207	0.053703	NaN	0.113951	0.129572	0.10397	NaN	NaN	NaN	0.0827816	0.125346	0.139514	0.121383	0.119153	0.103697
0.601615	0.597156	0.617969	0.650151	0.678052	0.688857	0.570683	0.327267	0.352745	0.44827	0.637383	0.713341	0.731692	0.697958	0.733343	0.721686	0.73365	0.699345	0.724744	0.642856	0.613518	0.634099	0.648182	0.636879	0.694131	0.707604	0.746721	0.708479	0.717746	0.680864
0.724445	0.688052	0.646207	0.695331	0.701799	0.411508	0.357308	0.30682	0.557887	0.74288	0.509274	0.716526	0.76738	0.788658	0.782137	0.77079	0.81105	0.806536	0.790731	0.649956	0.448793	0.723252	0.77922	0.822296	0.79748	0.811235	0.803835	0.789499	0.762079	0.757987
0.690898	0.713266	0.666612	0.698474	0.700869	0.717463	0.40024	0.389874	0.580474	0.663465	0.727326	0.761505	0.745077	0.740296	0.756064	0.745205	0.771568	0.761441	0.727944	0.704789	0.40957	0.59935	0.725631	0.784915	0.767405	0.784796	0.722049	0.675551	0.666367	0.656303
0.657176	0.669348	0.630058	0.629487	0.61262	0.660009	0.441301	0.418727	0.355431	0.442185	0.653488	0.712022	0.708639	0.70835	0.709015	0.716023	0.72984	0.768726	0.759592	0.733217	0.482978	0.552253	0.645217	0.6909	0.709388	0.733318	0.75519	0.753858	0.761436	0.743959
0.0811552	0.0659726	0.0619701	0.0732413	0.069859	0.0888944	0.115581	0.0872384	0.0654979	0.0570299	0.0573181	0.0601849	0.131296	0.117803	0.0866753	0.131352	0.0795353	0.115218	0.0958335	0.0825959	0.0681907	0.0756713	0.0508775	0.0707699	0.0646669	0.0843896	0.0848201	0.105863	0.0512127	0.0742976
0.105796	0.154411	0.138685	0.652947	0.658616	0.595733	0.101315	0.535199	0.150724	0.56033	0.632088	0.680732	0.700145	0.723659	0.749153	0.706876	0.734112	0.735289	0.705604	0.50894	NaN	0.559201	0.628039	0.653515	0.685136	0.710504	0.673491	0.656383	0.650436	0.603167
0.1009	0.158919	0.175959	0.639042	0.649245	0.164113	0.105392	0.465192	0.156856	0.552473	0.611704	0.67391	0.711259	0.76295	0.772747	0.753204	0.755625	0.773642	0.748823	0.56225	0.589698	0.675845	0.698536	0.69529	0.727052	0.750993	0.747792	0.752001	0.712311	0.709085
0.653835	0.577903	0.561036	0.645046	0.677906	0.58312	0.472529	0.478307	0.546398	0.562903	0.619436	0.695622	0.731652	0.745052	0.745657	0.735977	0.726904	0.732015	0.723151	0.519065	0.587991	0.678019	0.685894	0.679078	0.704143	0.720304	0.717594	0.728565	0.720468	0.71989
0.66004	0.702886	0.68201	0.658823	0.691749	0.684997	0.470148	0.51013	0.581376	0.562859	0.594392	0.649324	0.654841	0.661331	0.660889	0.651284	0.689372	0.699108	0.669389	0.535586	0.592796	0.650652	0.663365	0.641624	0.651905	0.662756	0.664309	0.672239	0.704117	0.711745
0.618641	0.690274	0.684098	0.680139	0.750715	0.720131	0.100945	0.191271	0.297769	0.413595	0.517643	0.650448	0.700832	0.792987	0.806066	0.81238	0.796491	0.615483	0.135363	0.158478	0.595097	0.756232	0.727836	0.772644	0.806041	0.798805	0.768178	0.769382	0.765424	0.788134
0.718565	0.726849	0.680432	0.624587	0.639304	0.667961	0.123129	0.0863521	0.319585	0.740549	0.802818	0.780357	0.791407	0.831476	0.836327	0.822153	0.794738	0.276373	0.397367	0.523783	0.468337	0.410649	0.48994	0.668095	0.680865	0.632037	0.69247	0.651662	0.686734	0.702844
0.128505	0.105349	0.113015	0.19131	0.158051	0.119572	0.0871798	0.04524	0.0726697	0.208277	0.213851	0.140899	0.0751121	0.0774528	0.123231	0.135253	0.104101	0.0548816	0.0925619	0.0602152	0.0619466	0.112466	0.122348	0.160958	NaN	0.0958324	0.110408	0.106172	0.100427	0.101022
0.0504705	0.0395117	0.039832	0.130626	0.156964	0.151189	0.104517	0.133129	0.119071	0.14787	0.0595807	0.117986	0.065447	0.078816	0.117574	0.165134	0.101105	0.0965035	0.0765664	0.101688	0.0943693	0.102697	0.128486	0.101927	0.0779412	0.0545263	0.0592011	0.0798415	0.077933	0.088034
0.0611182	0.0901245	0.0462459	0.0261216	0.0315161	0.059405	0.0447949	0.0320017	0.0242752	0.0840877	0.0980379	0.098525	0.100692	0.129831	0.0663926	0.109154	0.0736216	0.0838508	0.0816551	0.101808	0.0704915	0.0873669	0.0769732	0.0651135	0.0705273	0.115989	0.14062	0.100809	0.0685221	0.123187
0.0986125	0.0658939	0.136147	0.137011	0.113923	0.132051	0.0725169	0.0941398	0.0713036	0.112622	0.110839	0.0877522	0.155487	0.100757	0.147978	0.0867325	0.0695685	0.0581717	0.0942821	0.094641	0.0641659	0.0824139	0.0837673	0.0993351	0.11917	0.117877	0.0992142	0.107733	0.0550456	0.0556849
0.141639	0.174257	0.205801	0.208649	0.121399	0.14412	0.115707	0.143595	0.0907282	0.0982622	0.148518	0.122365	0.0993234	0.0955921	0.127693	0.108934	0.0935899	0.142842	0.118	0.0921429	0.0937303	0.0734855	0.0613608	0.0655841	0.0715677	0.106049	0.0931598	0.112795	0.122711	0.11661
0.670368	0.674304	0.63811	0.658901	0.678722	0.696251	0.686133	0.692965	0.701498	0.69402	0.567942	0.648509	0.679548	0.695832	0.699096	0.707508	0.697596	0.696521	0.689785	0.52896	0.64321	0.689127	0.698003	0.704534	0.678074	0.565768	0.658931	0.686401	0.693846	0.698951
0.64149	0.649536	0.64546	0.648971	0.650451	0.646883	0.628036	0.634711	0.639556	0.640676	0.462506	0.555131	0.610955	0.627323	0.634661	0.647973	0.646372	0.645957	0.565706	NaN	0.57384	0.613093	0.627595	0.636555	0.507082	0.586838	0.631632	0.637552	0.648171	0.65152
0.688908	0.656397	0.646123	0.703413	0.725976	0.711981	0.566161	0.665927	0.699953	0.50719	0.531696	0.658122	0.693704	0.708096	0.715255	0.725964	0.7199	0.713906	0.421812	0.506115	0.650156	0.691143	0.683878	0.650555	0.642704	0.61338	0.621331	0.664752	0.697908	0.707452
0.712901	0.685179	0.67251	0.664065	0.697754	0.691094	0.671031	0.69458	0.654228	0.592798	0.584441	0.655189	0.693592	0.700636	0.703666	0.707792	0.707746	0.702115	0.682174	0.46565	0.598608	0.671948	0.658396	0.667143	0.675984	0.65015	0.591267	0.646925	0.674591	0.667774
0.672212	0.72817	0.724524	0.686176	0.700057	0.730628	0.728933	0.741674	0.666366	0.504441	0.579876	0.634406	0.684813	0.733696	0.723546	0.734534	0.731067	0.742199	0.736265	0.320765	0.597998	0.705706	0.703199	0.698956	0.418497	0.588228	0.674145	0.700389	0.714816	0.704724
0.725175	0.728259	0.737339	0.736722	0.744223	0.75231	0.749896	0.756964	0.729889	0.536597	0.620844	0.681698	0.730178	0.741412	0.735725	0.751966	0.753315	0.758684	0.754198	0.552279	0.612132	0.716339	0.712768	0.735347	0.583579	0.608138	0.738116	0.750701	0.748508	0.757939
0.740835	0.721466	0.727931	0.738767	0.747545	0.748875	0.749879	0.760987	0.750479	0.549364	0.633757	0.718344	0.757931	0.75214	0.749462	0.771754	0.773512	0.770601	0.779485	0.55339	0.627133	0.742203	0.730436	0.750341	0.604197	0.607344	0.712832	0.74499	0.752924	0.759456
0.646944	0.743269	0.668211	0.688557	0.740386	0.695714	0.706385	0.60279	0.578347	0.558841	0.570108	0.675452	0.701687	0.713236	0.695222	0.711419	0.710014	0.690434	0.607049	0.462329	0.487847	0.555392	0.594018	0.600191	0.620966	0.603055	0.628984	0.666304	0.661098	0.625849
0.703727	0.722135	0.711461	0.700789	0.693374	0.669733	0.652297	0.660297	0.667631	0.462086	0.572171	0.633272	0.59617	0.634177	0.671993	0.694967	0.689236	0.712535	0.731289	0.580821	0.553348	0.612636	0.574361	0.575901	0.533206	0.543406	0.618004	0.666036	0.692931	0.695047
0.613535	0.65651	0.652419	0.642704	0.50249	0.618127	0.640112	0.656716	0.659371	0.634602	0.521939	0.61294	0.625661	0.629116	0.630834	0.648397	0.654951	0.670981	0.670289	0.663098	0.48745	0.591044	0.626513	0.394237	0.540003	0.648868	0.680999	0.688941	0.697791	0.692457
0.384174	0.448936	0.610347	0.659032	0.6466	0.659784	0.654448	0.645317	0.156704	0.270279	0.510878	0.389512	0.632345	0.72328	0.734431	0.759687	0.761189	0.720455	0.71741	0.119362	0.172003	0.499305	0.6108	0.674888	0.121554	0.546	0.662417	0.696981	0.720297	0.723769
0.687987	0.702243	0.728991	0.738257	0.738496	0.743341	0.741352	0.742114	0.765455	0.632337	0.653989	0.738332	0.750211	0.74738	0.741688	0.761108	0.747778	0.76349	0.749884	0.718639	0.625552	0.729956	0.725408	0.650834	0.61888	0.717998	0.743489	0.740087	0.767697	0.754012
0.720839	0.753309	0.812876	0.81245	0.821806	0.819114	0.825613	0.866619	0.666545	0.640328	0.752025	0.796019	0.823593	0.839497	0.849734	0.848301	0.856387	0.830098	0.830802	0.790663	0.773931	0.787896	0.808141	0.841146	0.84703	0.847316	0.839527	0.840917	0.845268	0.849467
0.718294	0.746675	0.80385	0.811327	0.795856	0.808479	0.808454	0.824556	0.608578	0.57512	0.725122	0.780565	0.798594	0.81372	0.818335	0.820165	0.824832	0.811576	0.814655	0.778256	0.764926	0.787206	0.815155	0.834013	0.84066	0.833729	0.831337	0.825682	0.837583	0.84034
0.695698	0.655728	0.650942	0.676062	0.683708	0.674471	0.679087	0.691535	0.679789	0.61917	0.644321	0.674948	0.70515	0.700036	0.700526	0.723447	0.707032	0.730357	0.714083	0.701889	0.671595	0.67073	0.645827	0.68345	0.688546	0.68145	0.656734	0.661093	0.684376	0.682933
0.671867	0.679837	0.673161	0.683471	0.688419	0.686316	0.669065	0.605142	0.576341	0.57936	0.579796	0.587534	0.658502	0.677931	0.687223	0.690217	0.693001	0.685883	0.676563	0.633506	0.62139	0.612834	0.664617	0.688346	0.615018	0.639722	0.672518	0.675796	0.682386	0.699601
0.707795	0.648443	0.624538	0.665109	0.691211	0.699256	0.698811	0.569499	0.61298	0.517165	0.571438	0.667099	0.702703	0.709171	0.720149	0.724248	0.734889	0.727886	0.728765	0.691516	0.532057	0.657818	0.670887	0.646638	0.66472	0.666406	0.685322	0.697934	0.714863	0.724277
0.666753	0.654685	0.648067	0.69359	0.661142	0.657086	0.666622	0.696288	0.701322	0.660645	0.644016	0.64685	0.699176	0.724504	0.72756	0.742293	0.744138	0.748855	0.742563	0.767549	0.619387	0.709347	0.737372	0.451475	0.570599	0.705168	0.71859	0.738749	0.722165	0.702925
0.658927	0.640859	0.661465	0.663461	0.605384	0.645327	0.665311	0.683148	0.695193	0.672863	0.615191	0.602959	0.663851	0.68807	0.711076	0.725444	0.734688	0.725242	0.731936	0.716512	0.642905	0.65574	0.629071	0.50393	0.606523	0.669425	0.702673	0.714541	0.711771	0.71307
0.640227	0.6593	0.640063	0.695321	0.670833	0.668736	0.679121	0.70557	0.73834	0.683145	0.676544	0.707867	0.727451	0.750345	0.764817	0.778648	0.785608	0.78988	0.793519	0.810578	0.667597	0.719364	0.752073	0.572468	0.61097	0.767583	0.785671	0.774403	0.779621	0.789682
0.694638	0.712265	0.706602	0.720036	0.699031	0.700873	0.687831	0.616756	0.706571	0.66345	0.620025	0.671209	0.721867	0.752582	0.775148	0.81467	0.798871	0.800809	0.81821	0.826332	0.786074	0.676717	0.760806	0.794544	0.522459	0.74985	0.797105	0.826414	0.824497	0.813147
0.0895142	0.211097	0.487133	0.561585	0.566129	0.604392	0.511866	0.345791	0.406222	0.387455	0.229265	0.436999	0.544944	0.505702	0.503915	0.496832	0.502769	0.393296	0.361274	0.326332	0.390536	0.375301	0.299011	0.181439	0.052013	0.239809	0.530585	0.76047	0.798439	0.73652
0.649381	0.610513	0.618467	0.639066	0.665964	0.644868	0.664301	0.671692	0.655902	0.590286	0.626896	0.673563	0.690071	0.708005	0.701035	0.709987	0.705979	0.716822	0.607883	0.625423	0.553633	0.579147	0.567955	0.531829	0.674126	0.693126	0.716658	0.714876	0.712844	0.701321
0.591394	0.600753	0.649663	0.681286	0.693687	0.68008	0.658706	0.63962	0.530603	0.588015	0.476916	0.627499	0.671978	0.664101	0.674847	0.684441	0.703237	0.716773	0.706254	0.719252	0.646785	0.526606	0.659515	0.676884	0.617647	0.602482	0.713635	0.733857	0.736479	0.728672
0.720116	0.73577	0.749047	0.735942	0.738562	0.733889	0.7259	0.774024	0.714357	0.154904	0.484832	0.725781	0.748281	0.810325	0.807282	0.844079	0.830583	0.834936	0.806403	0.809075	0.652039	0.558046	0.742883	0.786454	0.787716	0.751635	0.775929	0.779518	0.808124	0.775883
0.645505	0.573527	0.674769	0.701078	0.723196	0.719707	0.71011	0.710784	0.463204	0.439768	0.630347	0.6789	0.711348	0.724885	0.718743	0.735849	0.735283	0.729253	0.728656	0.727697	0.692972	0.473774	0.616315	0.68764	0.672157	0.569312	0.654869	0.694556	0.695571	0.707764
0.807964	0.812561	0.825024	0.819412	0.800572	0.803954	0.807767	0.815563	0.778089	0.792573	0.651362	0.723994	0.755276	0.743156	0.719107	0.736656	0.74386	0.741899	0.727877	0.716862	0.593576	0.644171	0.698792	0.693362	0.606118	0.65916	0.748424	0.731016	0.748967	0.732924
0.656838	0.169636	0.633267	0.746146	0.712216	0.795314	0.804303	0.77924	0.758444	0.2078	0.352225	0.603106	0.797184	0.748574	0.609932	0.695815	0.771069	0.765833	0.77802	NaN	NaN	0.626167	0.108419	0.217884	0.216972	0.184347	0.601226	0.682267	0.773121	0.80841
NaN	0.571042	0.653818	0.73051	0.649548	0.650223	0.743341	0.639681	NaN	0.262175	0.669158	NaN	0.636005	0.741433	0.673295	0.860732	0.835876	0.855873	0.856348	0.837141	NaN	0.598314	0.703806	NaN	0.430082	0.597305	0.608952	0.753975	0.769659	0.809447
0.381476	0.584659	0.726215	0.766587	0.763872	0.735771	0.678299	0.775451	0.579014	NaN	0.671881	0.618603	0.491966	0.644047	0.752046	0.699157	0.758403	0.668164	0.649413	0.745801	0.229943	0.385781	0.541224	0.123558	NaN	0.738129	0.773638	0.785084	0.793889	0.816493
NaN	0.590144	0.670561	0.673488	0.716409	0.654053	0.72501	0.627055	0.540255	0.296226	0.650555	0.461188	0.319418	0.638337	0.686516	0.714242	0.74633	0.578655	0.587969	0.74852	0.215748	0.327929	0.553528	0.123928	NaN	NaN	0.785589	0.802248	0.772685	0.736288
0.650739	0.576439	0.677958	0.711302	0.734361	0.731223	0.722891	0.716903	0.46389	0.439126	0.633099	0.687714	0.72714	0.729817	0.733503	0.749294	0.743099	0.73364	0.735819	0.742867	0.696577	0.480989	0.622444	0.689583	0.678703	NaN	0.66851	0.694987	0.695988	0.707764
0.561885	0.606738	0.649295	0.681876	0.71967	0.719178	0.698481	0.674529	0.629353	0.557013	0.557803	0.621514	0.69028	0.711336	0.708571	0.72174	0.736512	0.715977	0.706395	0.699655	0.694868	0.669551	0.564412	0.565103	0.62945	0.642046	0.658629	0.671378	0.680155	0.691648
0.738117	0.645538	0.651396	0.738344	0.770936	0.768861	0.631891	0.585749	0.719739	0.728629	0.506072	0.703378	0.755377	0.763372	0.75823	0.762344	0.748307	0.709323	0.679872	0.676488	0.622276	0.593138	0.593784	0.642294	0.653136	0.656985	0.6511	0.679875	0.705155	0.708972
0.776012	0.45614	0.73207	0.805909	0.828784	0.779394	0.731971	0.824277	0.822199	0.437391	0.640553	0.791721	0.808767	0.810111	0.787009	0.822236	0.803706	0.845588	0.825502	0.825102	0.817503	0.792341	0.713745	0.719098	0.567435	0.646011	0.763544	0.782154	0.784405	0.793301
0.631341	0.693347	0.747151	0.706159	0.702769	0.770785	0.7921	0.81091	0.771341	0.635894	0.709702	0.753861	0.76209	0.778072	0.791963	0.798202	0.814721	0.80582	0.78926	0.787562	0.822359	0.809443	0.79525	0.791818	0.722986	0.566632	0.760702	0.776376	0.788814	0.776895
0.767947	0.761718	0.768665	0.770035	0.782251	0.790966	0.794837	0.796595	0.779227	0.795379	0.717957	0.75912	0.776222	0.780749	0.776226	0.785372	0.775367	0.78884	0.778623	0.771426	0.793474	0.773882	0.763342	0.764352	0.716608	0.651909	0.761551	0.761183	0.753602	0.721095
0.815247	0.796023	0.802388	0.735053	0.810837	0.813065	0.804066	0.827517	0.838064	0.856192	0.850743	0.550936	0.715621	0.761604	0.770831	0.747992	0.760574	0.833035	0.842385	0.85078	0.85584	0.815952	0.754695	0.796534	0.609338	0.828455	0.848293	0.841929	0.797872	0.781001
0.737783	0.754038	0.743646	0.745741	0.779591	0.769492	0.762144	0.752948	0.760337	0.786242	0.753603	0.49714	0.689046	0.762726	0.771441	0.749073	0.761439	0.724993	0.722041	0.695817	0.623629	0.684487	0.671102	0.408411	0.433064	0.684482	0.755996	0.765886	0.756324	0.767468
0.863284	0.83222	0.267577	0.733414	0.836267	0.836913	0.839179	0.509667	0.464318	0.769878	0.0692941	0.567963	0.81322	0.843179	0.848	0.835645	0.816104	0.827084	0.833965	0.819066	0.793698	0.807047	0.817215	0.824873	0.77591	0.651909	0.562096	0.763691	0.800227	0.810504
0.654521	0.699623	0.738285	0.738571	0.480936	0.587038	0.588981	0.588453	0.617067	0.671838	0.517006	0.647321	0.732103	0.77794	0.783715	0.800204	0.807331	0.798708	0.782967	0.77807	0.616917	0.662937	0.664758	0.639937	0.668237	0.684034	0.678505	0.725969	0.794027	0.787533
0.064367	0.0625389	0.102124	0.0791241	0.0681973	0.10128	0.053097	0.0939641	0.0937688	0.0685198	0.0568144	0.0530423	NaN	0.0679866	0.02711	0.0274725	0.0446283	0.0494462	0.0481141	0.0552264	0.0574589	0.0511076	0.0614481	0.0571222	0.0806354	0.0501647	0.0629319	0.0735988	0.0978379	0.0896115
0.49015	0.548462	0.597401	0.577672	0.505544	0.590899	0.608397	0.601835	0.481836	0.578205	0.61414	0.51283	0.560728	0.606367	0.61984	0.62746	0.644472	0.631102	0.607345	0.551673	0.590383	0.578211	0.559403	0.546953	0.517442	0.620151	0.647699	0.662299	0.657117	0.657889
0.330015	0.358964	0.546155	0.366072	0.377541	0.362634	0.37068	0.312803	0.329865	0.388486	0.398398	0.387993	0.447412	0.481047	0.510927	0.473969	0.475483	0.45671	0.389814	0.388938	0.398734	0.433067	0.446673	0.435915	0.439689	0.332314	0.30086	0.285342	0.317954	0.326556
0.671869	0.650905	0.664768	0.647183	0.642311	0.633725	0.630241	0.634986	0.635658	0.62971	0.624433	0.629042	0.63171	0.643684	0.650631	0.65171	0.6409	0.637755	0.647064	0.63564	0.644094	0.623003	0.622579	0.618352	0.584058	0.573795	0.62386	0.626318	0.644748	0.657586
0.218264	0.240881	0.210113	0.268886	0.288873	0.313568	0.284508	0.265636	0.272355	0.294786	0.312176	0.3235	0.322171	0.387324	0.330214	0.311023	0.275726	0.29505	0.280448	0.247704	0.299316	0.323205	0.334333	0.376836	0.362646	0.38943	0.361766	0.379909	0.359512	0.358394
0.642627	0.641564	0.618453	0.638687	0.642021	0.591918	0.611417	0.629282	0.626179	0.616333	0.61868	0.63428	0.611574	0.638727	0.65213	0.664057	0.654629	0.63371	0.654148	0.667835	0.653162	0.639024	0.64924	0.639848	0.650002	0.65503	0.682344	0.708954	0.713255	0.701843
0.686598	0.635555	0.635818	0.653814	0.647954	0.613027	0.663103	0.694044	0.677527	0.512098	0.620628	0.67123	0.675583	0.683465	0.684886	0.694545	0.686082	0.692276	0.665888	0.682739	0.659391	0.611405	0.600692	0.640862	0.637064	0.673283	0.66454	0.660578	0.686075	0.686528
0.753637	0.721238	0.71422	0.677755	0.707952	0.699739	0.715496	0.560752	0.596182	0.613459	0.641542	0.674338	0.66567	0.677688	0.664852	0.645865	0.664869	0.669222	0.681241	0.706711	0.682847	0.54947	0.618951	0.664955	0.677527	0.678719	0.681341	0.69189	0.70315	0.691618
0.655115	0.624662	0.651461	0.649388	0.647035	0.566407	0.633468	0.63838	0.647548	0.602602	0.629699	0.64783	0.621869	0.674969	0.664304	0.668574	0.661967	0.648586	0.649883	0.66769	0.65537	0.65069	0.661358	0.644155	0.643229	0.654992	0.658392	0.683125	0.694373	0.695327
0.204964	0.157134	0.136751	0.108852	0.139458	0.225898	0.232005	0.209829	0.218194	0.228358	0.205015	0.180355	0.273029	0.28725	0.196389	0.154021	0.155663	0.113277	0.295676	0.286683	0.282575	0.346664	0.264284	0.305445	0.340204	0.346931	0.332225	0.281098	0.317335	0.258601
0.131955	0.20053	0.144318	0.157572	0.101274	0.193065	0.587994	0.638952	0.597215	0.425639	0.559774	0.108341	0.148792	0.178549	0.162198	0.168174	0.165592	0.164598	0.148773	0.474032	0.468522	0.466581	0.454753	0.489396	0.460488	0.539094	0.598434	0.610501	0.638307	0.596689
0.150288	NaN	NaN	0.156628	0.104453	NaN	0.0545861	0.120103	NaN	NaN	0.172849	NaN	0.165319	0.0730817	NaN	0.0822494	0.0959398	0.0677669	0.0790149	NaN	NaN	NaN	0.118353	0.0869815	0.0855672	0.0489601	0.0630191	NaN	0.0982668	NaN
0.139669	0.103454	0.103149	0.110869	0.180473	0.132774	0.0980565	0.0884624	0.0966589	0.0790898	0.153464	0.155131	0.115	NaN	0.117569	0.0722642	0.177855	0.134427	0.19309	0.191201	0.208458	0.200897	0.121125	0.0997401	0.166569	0.125054	0.164256	0.120733	0.0988629	0.129444
0.160108	0.180133	0.17129	0.105774	0.121189	NaN	NaN	NaN	0.134394	0.125742	0.0994813	0.0983717	0.112919	0.118904	NaN	NaN	NaN	0.104461	0.102216	0.148535	NaN	0.0841148	NaN	0.0601279	0.18653	NaN	NaN	NaN	NaN	0.0819075
0.632195	0.659423	0.631236	0.659678	0.671013	0.669064	0.662035	0.447557	0.50425	0.588781	0.663234	0.680214	0.668411	0.663127	0.677292	0.681242	0.683212	0.682532	0.67926	0.671903	0.657188	0.545672	0.626553	0.646286	0.663602	0.694169	0.675538	0.666205	0.660146	0.658874
0.54315	0.542361	0.618309	0.65672	0.688186	0.65072	0.556157	0.546914	0.497651	0.502078	0.585488	0.646127	0.67207	0.665812	0.664444	0.665627	0.675629	0.672123	0.65395	0.598122	0.627554	0.595278	0.598887	0.650852	0.684077	0.710958	0.679409	0.679338	0.689936	0.68607
0.615924	0.705682	0.706407	0.809518	0.831009	0.789166	0.11504	0.0703004	0.131748	0.519524	0.64159	0.802692	0.837813	0.842554	0.806436	0.805902	0.834469	0.868662	0.846669	0.103948	0.187447	0.560418	0.70582	0.8223	0.842879	0.821919	0.857717	NaN	0.84983	0.878149
0.55204	0.749363	0.76927	0.717503	0.730878	0.765894	0.642179	0.38436	0.483069	0.714629	0.757348	0.753119	0.80731	0.814034	0.811957	0.787931	0.819971	0.813985	0.812388	0.803356	0.571961	0.570296	0.740255	0.814537	0.823241	0.828679	0.82953	0.84023	0.847254	0.812244
0.058609	0.129481	0.0889586	0.100797	0.0663973	0.0669191	0.105426	0.127874	0.0565098	0.0740974	0.0812791	0.0795513	0.0749553	0.0662755	0.0942801	0.123478	0.104794	0.116332	0.105585	0.138913	0.10023	0.04669	0.062853	0.0672739	0.122527	0.152773	0.167348	0.138437	0.156927	0.137455
0.595916	0.571698	0.62166	0.620828	0.628174	0.655259	0.653743	0.481298	0.549144	0.528134	0.593886	0.609471	0.563904	0.626192	0.642761	0.654391	0.658718	0.634425	0.610945	0.587831	0.502203	0.50008	0.570706	0.617972	0.62125	0.625371	0.560545	0.669379	0.672029	0.667709
0.632159	0.627598	0.628212	0.690046	0.678798	0.613172	0.60022	0.455964	0.444208	0.538414	0.57276	0.663144	0.675461	0.69729	0.686056	0.692676	0.70033	0.697991	0.684954	0.603573	0.479201	0.597559	0.661804	0.676384	0.621446	0.658543	0.673427	0.687766	0.671541	0.663355
0.627729	0.621724	0.617779	0.667627	0.65783	0.601315	0.591926	0.455995	0.441698	0.537976	0.569618	0.616406	0.666719	0.673489	0.693065	0.678973	0.683764	0.667866	0.646799	0.624601	0.487894	0.603653	0.660625	0.687137	0.639477	0.661646	0.65697	0.647895	0.648885	0.64882
0.581369	0.505434	0.542058	0.492613	0.512451	0.502118	0.485487	0.518601	0.471961	0.450288	NaN	NaN	NaN	NaN	NaN	NaN	NaN	NaN	NaN	NaN	NaN	NaN	0.627476	NaN	0.721312	0.710944	0.704769	0.677209	0.626707	0.614729
0.377868	0.415126	0.267765	0.377365	0.440153	0.347079	0.155297	0.159646	0.137584	0.165728	0.30894	0.330436	0.472813	0.587176	0.66463	0.607502	0.614596	0.595399	0.104501	0.102675	0.259113	0.339447	0.404901	0.450518	0.49744	0.517201	0.649205	0.666213	0.693698	0.681219
0.75324	0.721551	0.710591	0.661443	0.634373	0.669975	0.71232	0.45574	0.425929	0.631838	0.689151	0.717181	0.72295	0.740392	0.726545	0.743671	0.734043	0.728339	0.733633	0.461747	0.530748	0.672328	0.720242	0.712517	0.708822	0.716958	0.712553	0.72009	0.720808	0.720317
0.683106	0.685444	0.68976	0.623975	0.59704	0.635506	0.656624	0.457016	NaN	0.578004	0.653333	0.685981	0.688314	0.695028	0.686791	0.700637	0.705126	0.692301	0.689225	0.421532	0.492579	0.673888	0.691086	0.700701	0.696447	0.702121	0.706484	0.705881	0.699439	0.707754
0.591699	0.665347	0.679964	0.616144	0.578984	0.650271	0.587247	0.40605	0.468709	0.593395	0.613038	0.673541	0.697632	0.697173	0.696173	0.715418	0.708529	0.694807	0.384271	0.455372	0.606307	0.67373	0.692464	0.703616	0.691682	0.699941	0.700156	0.696788	0.693249	0.70507
0.627857	0.659208	0.665872	0.696842	0.635214	0.585169	0.616531	0.417563	0.516723	0.635243	0.642191	0.696442	0.724919	0.705921	0.717743	0.738765	0.746534	0.734581	0.464958	0.441845	0.648668	0.709121	0.710099	0.721547	0.712386	0.71787	0.718469	0.714915	0.710398	0.718238
0.783467	0.80449	0.79137	0.688186	0.709234	0.702854	0.1442	0.109473	0.136598	0.43533	0.725762	0.772213	0.786771	0.812436	0.785124	0.783482	0.781779	0.759831	0.676262	0.170728	0.538954	0.761414	0.772994	0.734291	0.723863	0.74282	0.750146	0.745466	0.726067	0.735092
0.786033	0.821303	0.797483	0.692585	0.713975	0.702862	0.140089	0.106544	0.137379	0.436789	0.714489	0.777597	0.783515	0.791882	0.787087	0.79297	0.783745	0.774094	0.678827	0.174652	0.520221	0.7727	0.792536	0.784547	0.762488	0.772967	0.785191	0.77004	0.747191	0.775762
0.615838	0.590439	0.632514	0.656916	0.67775	0.622583	0.489239	0.19807	0.307169	0.463772	0.592274	0.644573	0.650987	0.696955	0.661661	0.652971	0.664053	0.634185	0.557742	0.292347	0.24826	0.408431	0.476323	0.517869	0.646907	0.655766	0.659839	0.669416	0.648857	0.68552
0.561762	0.519409	0.541024	0.576866	0.594751	0.569397	0.451825	0.467674	0.462853	0.548388	0.510386	NaN	NaN	NaN	NaN	NaN	NaN	0.589308	0.480986	0.459756	0.469797	0.528948	0.585869	0.619867	0.6376	0.642568	0.647026	0.654032	0.647098	0.641879
0.577364	0.537689	0.580212	0.61355	0.608838	0.57874	0.458831	0.470316	0.490359	0.572068	0.576124	0.540232	0.612549	0.636032	0.608676	0.60187	0.612248	0.612578	0.608335	0.652296	0.491662	0.596786	0.645462	0.654521	0.655284	0.662237	0.665728	0.675993	0.672861	0.673443
0.587543	0.57093	0.61088	0.64053	0.649466	0.618693	0.467735	0.48563	0.489321	0.577298	0.566765	0.56035	0.634089	0.647713	0.642933	0.628904	0.652013	0.652285	0.636696	0.565394	0.533368	0.602533	0.638543	0.65684	0.662017	0.66093	0.662732	0.642002	0.643135	0.645011
0.498336	0.511381	0.592384	0.56726	0.59322	0.587487	0.398636	0.428446	0.47093	0.524488	0.540482	0.563504	0.625817	0.645427	0.609898	0.615844	0.605033	0.597287	0.618399	0.58113	0.475694	0.59914	0.629582	0.628036	0.618927	0.606876	0.603025	0.595565	0.589886	0.593151
0.695559	0.693738	0.709347	0.680366	0.692912	0.731836	0.383833	0.330626	0.504462	0.689259	0.738109	0.776657	0.787895	0.785644	0.779764	0.746457	0.741033	0.772857	0.783224	0.40296	0.507664	0.694174	0.74131	0.77341	0.773752	0.771743	0.756816	0.779165	0.793276	0.786792
0.67088	0.699652	0.708603	0.713451	0.732239	0.757126	0.439544	0.431176	0.458338	0.635793	0.747291	0.784989	0.781547	0.767852	0.737247	0.76476	0.757992	0.772762	0.791264	0.772719	0.545206	0.683033	0.749797	0.76341	0.759327	0.750399	0.701702	0.75283	0.757193	0.747754
0.632556	0.651387	0.628272	0.653119	0.676647	0.690485	0.625388	0.498439	0.48417	0.585624	0.670396	0.731154	0.742765	0.714725	0.700295	0.710727	0.703185	0.708214	0.717205	0.725132	0.548817	0.622043	0.661523	0.687754	0.717733	0.746367	0.746767	0.727652	0.722898	0.706621
0.591258	0.665865	0.676419	0.689071	0.736462	0.734311	0.711251	0.507661	NaN	0.57071	0.68476	0.737241	0.730465	0.722618	0.711234	0.719936	0.742002	0.743012	0.751777	0.737704	0.503738	0.626267	0.686524	0.697225	0.7269	0.642212	0.704124	0.718879	0.700217	0.730992
0.455873	0.536132	0.570284	0.585572	0.592974	0.588443	0.41057	0.514485	0.374288	0.429208	0.53701	0.578844	0.608092	0.610067	0.614924	0.621796	0.616555	0.607678	0.623454	0.624694	0.617775	0.396471	0.547872	0.618039	0.623494	0.631642	0.621524	0.61348	0.604696	0.602433
0.0519081	0.0575726	0.0502566	0.0454519	0.0774158	0.045319	0.042095	0.0500241	0.0713981	0.0553898	0.0620851	0.0394863	0.04946	0.0412079	0.0426326	0.0484987	0.0517311	0.0487873	0.0644963	0.095065	0.0741715	0.0631802	0.0642666	0.0496333	0.09944	0.105114	0.118644	0.103517	0.0989506	0.0782713
0.167616	0.10675	0.277247	NaN	NaN	0.190737	0.236304	NaN	0.209028	0.176103	0.158966	NaN	0.1954	NaN	0.153751	0.165664	0.15164	0.180756	0.231313	0.131425	0.092807	NaN	NaN	0.0980176	0.0850379	NaN	0.159039	NaN	NaN	0.163816
0.364593	0.408652	0.464597	0.449141	0.44993	0.453799	0.428599	0.448278	0.448436	0.52347	0.537209	0.684667	0.765982	0.751819	0.827535	0.843723	0.859811	0.819242	0.728295	0.540827	0.395095	NaN	NaN	0.583977	0.67323	0.400852	0.694403	0.66479	0.661002	0.652814
0.750188	0.776922	0.712359	0.740149	0.692254	0.784258	0.736606	0.155045	0.122582	0.543391	0.729206	0.783722	0.813763	0.829393	0.807439	0.821517	0.808611	0.759251	0.750438	0.580549	0.0715394	0.545601	0.72979	0.744803	0.741907	0.725111	0.725751	0.738271	0.710395	0.707927
0.616626	0.630033	0.611068	0.576454	0.523561	0.444452	0.0953663	0.116627	0.112117	0.298996	0.50921	0.64796	0.731574	0.775389	0.746815	0.730424	0.762556	0.773659	0.803422	0.0841759	0.124518	0.644201	0.79955	0.803615	0.812466	0.844583	0.843365	0.833315	0.790758	0.833238
0.654516	0.658733	0.664088	0.666307	0.653847	0.637779	0.627924	0.46994	0.531299	0.57521	0.610346	0.598817	0.625463	0.625427	0.524784	0.612331	0.641777	0.649543	0.654503	0.614179	0.489635	0.571474	0.620767	0.635749	0.634762	0.644179	0.647354	0.657984	0.653469	0.65486
0.349285	0.355069	0.359573	0.392712	0.385278	0.373668	0.311079	0.31327	0.337413	0.297296	0.411993	0.409691	0.405465	0.389528	0.315409	0.318299	0.266918	0.248472	0.194963	0.209431	0.223617	0.257992	0.227809	0.273197	0.324391	0.249905	0.289236	0.282165	0.185174	0.247904
0.572168	0.578381	0.554899	0.658058	0.580784	0.530805	0.627775	0.618661	0.58133	0.610477	0.587417	0.684543	0.64289	0.645496	0.649608	0.666053	0.665582	0.680344	0.61049	0.588849	0.641122	0.530681	0.5565	0.668449	0.666397	0.596526	0.643171	0.664968	0.68686	0.686032
0.362717	0.361786	0.343856	0.392541	0.363535	0.445222	0.433322	0.382974	0.34308	0.352647	0.299344	0.243188	0.222889	0.301421	0.263638	0.295412	0.306081	0.304865	0.29045	0.318008	0.222963	0.262661	0.199831	0.176168	0.222241	0.27453	0.276083	0.244056	0.209464	0.215438
0.297896	0.276575	0.26428	0.236292	0.203781	0.218742	0.220033	0.223289	0.211316	0.252073	0.284242	0.264332	0.349255	0.315402	0.324401	0.279688	0.304524	0.374878	0.357537	0.346198	0.314923	0.332818	0.375567	0.403537	0.370544	0.351654	0.341364	0.296371	NaN	0.253472
0.316132	0.27912	0.260682	0.230644	0.202646	0.229595	0.223922	0.217953	0.202638	0.251095	0.165705	0.304448	0.35531	0.311944	0.322156	0.27944	0.302368	0.377391	0.365301	0.337022	0.18957	0.248382	0.177469	0.204642	0.293318	0.225671	0.220228	0.159396	0.130539	0.245264
0.052052	0.0564332	0.0498881	0.0445357	0.0758678	0.0447852	0.0402746	0.0582231	0.135875	0.206665	0.102756	0.0468007	0.053936	0.0409538	0.0422494	0.049554	0.0511239	0.0495007	0.102325	0.143335	0.140804	0.0508071	0.0514368	0.184074	0.119064	0.186269	NaN	0.0921985	0.188556	NaN
0.643676	0.650882	0.64485	0.631505	0.629295	0.647321	0.63857	0.642546	0.398379	0.461554	0.582767	0.633878	0.663444	0.674446	0.639773	0.657137	0.668582	0.620627	0.612574	0.62608	0.672781	0.622572	0.619149	0.631508	0.633748	0.639054	0.646235	0.616736	0.610572	0.631192
0.700706	0.694183	0.670124	0.669698	0.697608	0.660273	0.675994	0.719286	0.337176	0.456787	0.588559	0.67198	0.710592	0.692654	0.651592	0.667327	0.669106	0.643319	0.651246	0.713917	0.711512	0.402947	0.57617	0.630836	0.684674	0.703882	0.712733	0.710366	0.625678	0.668377
0.240372	0.273476	0.753836	0.77418	0.791935	0.742428	0.348799	0.316241	0.281418	0.3288	0.392486	NaN	NaN	0.718234	NaN	0.826322	0.811115	0.792062	0.870609	0.814842	0.613091	0.727135	0.793772	0.801734	0.777995	0.79308	0.800728	0.782087	0.785398	0.800119
0.729108	0.705758	0.698162	0.43507	0.637586	0.732157	0.788521	0.592461	0.134468	0.2574	0.73871	0.765486	0.802823	0.701853	0.727218	0.608033	0.630946	0.623716	0.62469	0.130121	0.12974	0.329172	0.518049	0.619056	0.706263	0.704982	0.657976	0.719147	0.616085	0.711128
0.779097	0.757884	0.742629	0.746095	0.744888	0.768357	0.766508	0.102981	0.121409	0.232657	0.622556	0.720091	0.802802	0.809843	0.796211	0.816344	0.792171	0.821467	0.777711	0.790748	0.186764	0.598424	0.753353	0.782937	0.789156	0.801001	0.819784	0.799225	0.792998	0.801871
0.562286	0.446989	0.535054	0.609466	0.652278	0.638436	0.36407	0.104025	0.103686	0.191027	0.325779	0.409954	0.487313	0.458185	0.475884	0.521341	0.534543	0.544507	0.542694	0.233512	0.224564	0.559763	0.627787	0.510401	0.662748	0.653398	0.546644	0.668918	0.570627	0.566162
0.449884	0.463562	0.47877	0.503895	0.500354	0.498423	0.514472	0.642124	0.588435	0.50195	0.61277	0.662057	0.683181	0.681127	0.575703	0.601336	0.578788	0.58221	0.565103	0.545819	0.494264	0.460374	0.444034	0.534086	0.57231	0.549562	0.569937	0.615788	0.628497	0.647464
0.672163	0.664254	0.63225	0.661083	0.661802	0.651391	0.6409	0.656063	0.64208	0.513566	0.603793	0.683672	0.675425	0.679555	0.680449	0.704178	0.717425	0.698646	0.685941	0.686617	0.534125	0.598646	0.638206	0.676859	0.685041	0.686171	0.696557	0.697519	0.690891	0.703643
0.740106	0.740901	0.650624	0.729329	0.73313	0.679975	0.668887	0.788203	0.661892	0.573919	0.682487	NaN	NaN	NaN	NaN	0.79668	NaN	0.774176	NaN	0.707528	NaN	NaN	NaN	NaN	0.756972	0.797631	0.807972	0.758927	0.748323	0.7614
0.643204	0.662172	0.678048	0.685329	0.662857	0.66093	0.688851	0.697334	0.403777	0.499089	0.604698	0.654414	0.697928	0.679321	0.663989	0.684295	0.682875	0.658673	0.653541	0.646756	0.516845	0.589543	0.621207	0.650833	0.647313	0.663143	0.648446	0.660221	0.658593	0.663833
0.651723	0.681447	0.716942	0.685757	0.662648	0.664246	0.695758	0.702438	0.407227	0.499031	0.59753	0.658827	0.67805	0.672407	0.678251	0.686809	0.698323	0.676041	0.676867	0.660009	0.521768	0.584931	0.629679	0.654055	0.669643	0.665194	0.708217	0.711023	0.709612	0.699249
0.651364	0.664801	0.664036	0.596783	0.620423	0.654625	0.670203	0.594978	0.467414	0.557506	0.569915	0.645782	0.669509	0.679853	0.677657	0.681539	0.681622	0.660141	0.577472	0.60861	0.499875	0.554952	0.616008	0.619225	0.644984	0.65792	0.668189	0.666753	0.666166	0.645663
0.58605	0.627248	0.694733	0.589664	0.555601	0.512578	0.505121	0.247833	0.207711	0.192113	0.391814	0.499196	0.534251	0.510619	0.547313	0.588164	0.61681	0.640104	0.656233	0.726715	0.599141	0.209041	0.521842	0.700379	0.757817	0.814383	0.510818	0.772221	0.79185	0.787995
0.528911	0.576124	0.652925	0.640134	0.603938	0.682835	0.688777	0.172686	0.107364	0.372693	0.562815	0.592255	0.625099	0.565499	0.526194	0.526444	0.587285	0.629493	0.60537	0.454048	0.210679	0.353538	0.467407	0.523882	0.572334	0.584619	0.530512	0.519434	0.575582	0.577021
0.519389	0.518058	0.65599	0.619957	0.645916	0.669142	0.652888	0.175879	0.124336	0.375568	0.562815	0.56791	0.594536	0.572375	0.537178	0.54769	0.600913	0.640308	0.638421	0.488754	0.212402	0.354262	0.445932	0.508205	0.551567	0.584619	0.554071	0.582683	0.618684	0.602239
0.493355	0.576884	0.625912	0.632649	0.52787	0.581586	0.603425	0.433971	0.440625	0.468563	0.557169	0.635947	0.671846	0.665356	0.663237	0.677747	0.682507	0.681243	0.6739	0.523377	0.502558	0.562097	0.617824	0.636247	0.64147	0.607921	0.630872	0.651563	0.658902	0.650254
0.652659	0.684731	0.675353	0.692797	0.70407	0.694785	0.412706	0.333298	0.35201	0.488929	0.481787	0.568365	0.594867	0.611885	0.613386	0.630333	0.610003	0.652146	0.642362	0.600712	0.398727	0.453833	0.556026	0.586391	0.597119	0.611028	0.623425	0.615757	0.611949	0.630294
0.685964	0.751123	0.770969	0.795088	0.794682	0.796	0.326735	0.362061	0.521474	0.745143	0.768989	0.829213	0.83684	0.792061	0.735059	0.740422	0.699853	0.664873	0.653764	0.657536	0.341171	0.579053	0.670071	0.707186	0.728286	0.725979	0.723235	0.683363	0.678895	0.734971
0.782346	0.703087	0.735175	0.782916	0.806203	0.790381	0.183666	0.249469	0.366905	0.571353	0.736406	0.783207	0.787333	0.803245	0.778303	0.769153	0.773362	0.75679	0.74827	0.225833	0.264648	0.602139	0.675925	0.70168	0.723373	0.714188	0.64457	0.742592	0.748675	0.754033
0.744759	0.700974	0.729775	0.771561	0.801722	0.779662	0.180082	0.250132	0.380423	0.593043	0.746965	0.752057	0.748334	0.733817	0.716952	0.744358	0.739284	0.702154	0.710649	0.225617	0.283795	0.648918	0.659062	0.674442	0.642442	0.665814	0.682683	0.685653	0.681723	0.696175
0.471224	0.575268	0.645777	0.695192	0.771219	0.632781	0.39482	0.139701	0.243353	0.472906	0.560319	0.587268	0.631236	0.679548	0.685999	0.690021	0.678678	0.563317	0.610505	0.550187	0.332233	0.565389	0.601582	0.636002	0.622781	0.609026	0.599393	0.683985	0.639614	0.610733
0.483163	0.580072	0.641782	0.671199	0.682391	0.675366	0.52827	0.389111	0.473777	0.565548	0.608485	0.632829	0.656642	0.679793	0.678174	0.693235	0.67048	0.663618	0.688985	0.661988	0.454467	0.554642	0.639663	0.677592	0.680626	0.682878	0.688382	0.647764	0.685912	0.624259
0.482365	0.580922	0.650136	0.689028	0.720726	0.694951	0.524893	0.386785	0.428457	0.569822	0.615912	0.632452	0.658906	0.675919	0.677871	0.69505	0.68897	0.678408	0.702698	0.670161	0.455448	0.554502	0.649584	0.646382	0.659254	0.683735	0.688382	0.665982	0.687463	0.625069
0.692034	0.60506	0.621699	0.680275	0.699361	0.63129	0.64429	0.537145	0.406875	0.630114	0.626261	0.713985	0.756574	0.739561	0.743771	0.745401	0.748186	0.751805	0.759896	0.734709	0.526717	0.677554	0.710479	0.596545	0.672915	0.723377	0.730446	0.735076	0.722316	0.727091
0.665603	0.603441	0.619109	0.582306	0.603898	0.613201	0.623469	0.611941	0.156839	0.313787	0.479734	0.624843	0.592821	0.621194	0.618007	0.631258	0.640881	0.620586	0.644707	0.626685	0.668	0.628345	0.62212	0.63924	0.648244	0.636566	0.647046	0.608641	0.598281	0.605524
0.493095	0.592236	0.612769	0.622389	0.629408	0.602254	0.523509	0.540779	0.394937	0.462194	0.581408	0.587949	0.616849	0.621344	0.636628	0.64211	0.64942	0.645257	0.613715	0.519692	0.523777	0.504062	0.493122	0.587054	0.625983	0.625068	0.639863	0.634999	0.630261	0.641643
0.12357	0.111235	0.110706	0.0961608	0.130317	NaN	0.0808194	0.104902	0.109617	0.0663732	NaN	NaN	NaN	0.122233	0.0988562	0.134803	0.133125	NaN	0.162555	0.0797418	NaN	0.146408	NaN	0.104515	0.133792	0.126435	0.1807	NaN	NaN	0.146898
0.135183	0.136748	0.171382	NaN	NaN	0.126579	NaN	NaN	NaN	0.20406	0.197364	NaN	0.210713	NaN	0.185348	0.141988	0.219211	NaN	NaN	0.176547	NaN	NaN	NaN	0.12017	NaN	0.107823	NaN	NaN	NaN	0.0948957
0.2439	0.137585	0.110351	0.154831	0.122121	0.138347	0.165951	0.133083	0.115332	0.124187	0.147061	0.211554	0.142474	0.240967	0.286687	NaN	NaN	NaN	0.193569	0.147717	0.162877	0.178748	NaN	NaN	0.137419	NaN	0.136321	NaN	0.18296	0.117502
NaN	0.201601	0.171971	0.162466	0.140811	0.165766	0.17175	0.213642	0.240804	0.162898	0.135569	0.150684	0.161772	0.146056	0.142875	0.118095	NaN	NaN	0.127365	NaN	0.105089	0.109913	0.13869	0.103424	0.155123	0.144823	NaN	0.150749	0.155656	0.154236
0.199704	0.201366	0.167757	0.163646	0.143229	0.164862	0.169614	0.175243	NaN	NaN	0.156744	0.14962	0.164041	0.158024	0.140731	NaN	NaN	NaN	0.136512	NaN	0.103944	0.10716	0.142284	0.103489	0.156913	0.149549	NaN	NaN	NaN	0.154711
0.616877	0.618215	0.627999	0.63153	0.626408	0.615053	0.618699	0.599135	0.599627	0.582563	0.582004	0.594228	0.586889	0.595564	0.588357	0.595539	0.596498	0.603525	0.611604	0.600156	0.604929	0.602858	0.585751	0.584802	0.590063	0.597733	0.597637	0.601359	0.602825	0.603383
0.615194	0.533456	0.637676	0.651909	0.641562	0.561872	0.572031	0.413628	0.440117	0.467852	0.577412	0.654915	0.672467	0.684957	0.676098	0.669646	0.675266	0.678371	0.658986	0.576847	0.548442	0.556845	0.554333	0.612404	0.628205	0.657	0.669011	0.667672	0.66333	0.665203
0.730121	0.628527	0.625796	0.702975	0.727988	0.676429	0.690926	0.629949	0.503187	0.659578	0.650447	0.717706	0.764283	0.783904	0.748769	0.758013	0.772369	0.772435	0.781559	0.756553	0.521485	0.699142	0.723701	0.607327	0.685292	0.746825	0.745115	0.771731	0.768299	0.76397
0.591297	0.62155	0.638327	0.603441	0.617379	0.600844	0.621111	0.661781	0.285997	0.522803	0.554233	0.633909	0.638808	0.646097	0.630754	0.61307	0.657474	0.637736	0.661175	0.65656	0.701271	0.332006	0.532916	0.603276	0.629909	0.641907	0.662308	0.662608	0.64194	0.653153
0.173577	0.145332	0.172958	0.120479	0.150871	0.122286	0.124149	NaN	NaN	NaN	0.166839	0.195401	NaN	0.111912	NaN	0.187965	NaN	NaN	0.106782	0.138673	0.160217	0.209103	NaN	0.109549	0.166512	NaN	0.138023	0.0771626	0.0634282	NaN
0.179175	0.262792	0.215449	0.242614	0.206503	0.18489	0.203443	0.229435	0.258968	0.250274	0.214544	0.200948	0.230199	0.273954	0.240535	0.230905	0.196503	0.239194	0.213885	0.191762	0.221478	0.248242	0.215457	0.272096	0.303233	0.376578	0.327737	0.343123	0.216178	0.253754
0.233387	0.26777	0.199029	0.186931	0.156637	0.183994	0.166448	0.165968	0.185784	0.184738	0.277579	0.249568	0.225232	0.288981	0.248713	0.263597	0.220011	0.209838	0.194065	0.168202	0.13773	0.145379	0.204286	0.252867	0.2546	0.274017	0.289551	0.324229	0.222569	0.250486
NaN	NaN	0.149866	0.147898	NaN	0.159248	0.150461	0.181701	NaN	0.132435	0.116425	NaN	NaN	NaN	NaN	NaN	NaN	NaN	NaN	0.121188	NaN	0.165742	NaN	0.129457	NaN	0.0951332	0.152597	0.184468	0.137037	0.162133
0.107643	0.132492	0.114307	0.151185	0.107749	0.0772395	0.093407	0.118756	0.079393	0.103073	0.111952	0.130759	0.122919	0.0725211	0.122144	0.119514	0.0887122	0.185047	0.0873832	0.134245	0.168137	0.116823	0.11691	0.109107	0.119292	NaN	0.109272	0.0926894	0.102078	0.168067
NaN	NaN	0.20462	0.20297	0.205809	NaN	0.127995	0.154856	0.19905	NaN	0.141246	0.178183	0.195754	0.2211	0.234003	0.259748	0.181931	0.314281	0.223674	0.274811	0.216519	0.183791	0.141279	0.208488	0.182637	0.173123	0.128293	0.173781	0.209065	0.139981
0.159416	0.254772	0.241516	0.242797	0.268122	0.267931	0.260546	0.304158	0.190403	0.148222	0.158558	0.154852	0.0916398	0.0948581	0.114439	0.11507	0.0906821	0.14375	0.168775	0.118637	0.13504	0.117155	0.181943	0.135022	0.139918	0.545054	0.578884	0.106175	0.132987	0.137315
0.129825	0.128358	0.190473	0.224214	0.148325	0.182572	0.179079	0.186619	0.135539	0.25075	0.201289	0.133436	0.146276	0.103858	0.203271	0.170405	0.136555	0.140792	0.137926	NaN	0.204979	0.15555	0.165109	0.134263	0.129572	NaN	0.0797658	0.13533	0.140168	0.1098
0.657435	0.534597	0.632809	0.66058	0.677709	0.682181	0.593572	0.560265	0.648054	0.667817	0.615516	0.625234	0.666878	0.687655	0.696839	0.701225	0.708281	0.704272	0.709988	0.711676	0.713792	0.703994	0.561399	0.587217	0.604191	0.575976	0.593462	0.593276	0.691035	0.692449
0.0926386	NaN	0.113329	0.0961608	0.131249	NaN	0.0809303	0.0908779	NaN	0.166734	0.0955529	NaN	0.0828846	0.123666	NaN	0.120639	0.0929564	NaN	NaN	0.154266	NaN	0.141605	NaN	0.11195	NaN	NaN	NaN	0.119175	NaN	0.132874
0.510208	0.653502	0.689112	0.699727	0.712734	0.690609	0.528254	0.676092	0.68957	0.642705	0.538856	0.672254	0.702556	0.705608	0.704622	0.71198	0.713199	0.694235	0.710378	0.684071	0.706753	0.701827	0.69449	0.686719	0.700085	0.697251	0.695489	0.701584	0.685183	0.686303
0.656432	0.485308	0.59041	0.624886	0.629893	0.621795	0.614602	0.310461	0.489188	0.560106	0.465261	0.600019	0.661021	0.676669	0.67921	0.707514	0.738163	0.71854	0.71899	0.703047	0.742863	0.718387	0.665771	0.633942	0.660307	0.670095	0.687648	0.665187	0.654088	0.659739
0.207301	0.209968	0.186374	0.218676	0.204669	0.162635	0.202185	0.181891	0.171563	0.167433	0.20203	0.225117	0.206455	0.182267	0.213549	0.27416	0.259512	0.253483	0.282926	0.233209	0.272253	0.316798	0.318698	0.351427	0.327238	0.336007	0.310072	0.331399	0.328258	0.286962
0.561165	0.602539	0.632138	0.631103	0.628001	0.621205	0.591662	0.610784	0.523933	0.540214	0.612281	0.63144	0.656647	0.648355	0.648167	0.662928	0.659944	0.658802	0.65879	0.651792	0.614043	0.6003	0.629271	0.655951	0.661091	0.665797	0.674828	0.689665	0.665034	0.647866
0.56404	0.593816	0.615901	0.62528	0.617646	0.612135	0.591792	0.608165	0.52856	0.538197	0.597396	0.623352	0.647435	0.637079	0.63871	0.637271	0.635144	0.631511	0.634431	0.618909	0.593955	0.584734	0.59493	0.623484	0.620559	0.637047	0.622807	0.643581	0.624683	0.61683
0.451699	0.581134	0.624338	0.638164	0.66104	0.427177	0.552949	0.629206	0.328863	0.505031	0.600572	0.640408	0.662598	0.664514	0.661128	0.678069	0.693119	0.681116	0.685206	0.683865	0.692735	0.686114	0.653612	0.600079	0.661917	0.687746	0.699546	0.712377	0.681274	0.686854
0.685453	0.693792	0.691442	0.673607	0.670939	0.674529	0.672585	0.67157	0.663819	0.466065	0.61182	0.668446	0.691789	0.707062	0.690164	0.695772	0.693753	0.686525	0.673221	0.680967	0.696373	0.663493	0.493498	0.594476	0.625672	0.67019	0.668453	0.674613	0.678145	0.681978
0.706027	0.632689	0.668441	0.682922	0.679509	0.682222	0.698291	0.676372	0.515261	0.625434	0.696195	0.722191	0.710992	0.703099	0.697599	0.682833	0.695122	0.688648	0.69513	0.682599	0.693224	0.60188	0.612267	0.673944	0.654306	0.688384	0.687229	0.688681	0.66154	0.692076
0.67465	0.62474	0.650402	0.681836	0.670923	0.674119	0.685674	0.666872	0.511436	0.618255	0.688271	0.708918	0.695561	0.686784	0.686878	0.678606	0.691756	0.687002	0.682504	0.667474	0.669171	0.596275	0.605121	0.65453	0.663503	0.675922	0.678211	0.681709	0.669059	0.684946
0.354627	0.369432	0.365645	0.359828	0.416004	0.390493	0.389695	0.376834	0.610846	0.424703	0.550934	0.77685	0.775951	0.787537	0.794729	0.780268	0.73997	NaN	NaN	0.720495	0.457039	0.562894	0.714263	0.724982	0.728308	NaN	0.745097	NaN	0.286036	0.325903
0.531821	0.599112	0.624973	0.62752	0.607081	0.630886	0.643032	0.49621	0.506018	0.571596	0.623626	0.662977	0.679299	0.684814	0.687294	0.683686	0.684569	0.684546	0.663694	0.467511	0.577643	0.470628	0.550011	0.596263	0.574257	0.641134	0.631753	0.610124	0.649879	0.675306
0.350012	0.306034	NaN	0.630249	0.371453	0.27692	0.308205	0.291898	0.370578	0.347281	0.492393	0.367181	0.262056	0.242517	0.353338	NaN	0.719099	0.337626	0.311334	0.303703	0.352212	0.357478	0.348025	0.318064	0.272042	0.260428	0.225844	0.21449	0.233637	0.22869
0.728777	0.712411	0.735699	0.729758	0.733201	0.716084	0.64634	0.559071	0.547456	0.646984	0.721125	0.725467	0.731077	0.739024	0.743637	0.74297	0.748915	0.752218	0.612571	0.709954	0.745416	0.513678	0.666166	0.721826	0.747421	0.754259	0.766295	0.767226	0.773265	0.790319
0.759872	0.748109	0.761797	0.781162	0.787264	0.80102	0.654894	0.616506	0.256072	0.618434	0.713018	0.784507	0.822268	0.826394	0.842816	0.816649	0.836703	0.829205	0.79393	0.588299	0.804181	0.701716	0.456487	0.739322	0.823944	0.818222	0.828515	0.804777	0.790528	0.811484
0.453582	0.705181	0.783026	0.796494	0.681334	0.72808	0.758884	0.202873	0.185204	0.722871	0.680842	0.747168	0.796259	0.836223	0.8112	0.831922	0.835991	0.822575	0.773257	0.673606	0.558676	0.261246	0.643403	0.751888	0.784089	0.774581	0.739419	0.773287	0.775011	0.776531
0.583571	0.6937	0.73538	0.742735	0.750215	0.685441	0.707314	0.782586	0.3492	0.557092	0.660989	0.697144	0.738074	0.730355	0.771794	0.781699	0.803113	0.810803	0.817919	0.797985	0.779378	0.80241	0.557956	0.713372	0.760027	0.788944	0.779476	0.796665	0.793087	0.795194
0.575285	0.629292	0.655481	0.65379	0.62439	0.522573	0.59099	0.630175	0.643564	0.586163	0.537335	0.615769	0.645143	0.641617	0.647607	0.65249	0.639922	0.62476	0.588819	0.608222	0.630146	0.632303	0.596775	0.565329	0.60723	0.63693	0.644013	0.637718	0.634376	0.625435
0.123588	NaN	NaN	NaN	NaN	NaN	NaN	0.11295	NaN	0.0881776	NaN	NaN	0.0795378	0.111077	0.103566	NaN	NaN	NaN	NaN	NaN	0.0963293	0.081355	0.0919185	0.114792	0.113746	0.145636	0.0734733	0.134952	0.0620142	NaN
0.629809	0.675655	0.631593	0.642315	0.63395	0.638672	0.678224	0.694257	0.691498	0.625642	0.687908	0.702281	0.711835	0.718999	0.731033	0.735964	0.722882	0.704987	0.703732	0.534676	0.599258	0.640725	0.531916	0.650235	0.719875	0.72747	0.721035	0.740131	0.719139	0.708784
0.67914	0.604708	0.654196	0.681642	0.683951	0.68265	0.427832	0.607005	0.622992	NaN	0.669197	0.690604	0.732321	0.712841	0.735737	0.727681	0.730929	0.733934	0.759711	0.743919	0.739688	0.708303	0.657268	0.739615	0.743001	0.687211	0.713412	0.753951	0.754432	0.743733
0.54236	0.562981	0.601864	0.626027	0.653624	0.642478	0.640761	0.678368	0.505048	0.473107	0.594354	0.63591	0.682053	0.69403	0.684692	0.719741	0.71023	0.723558	0.711319	0.71356	0.700152	0.692327	0.495292	0.584236	0.654209	0.687493	0.651205	0.6371	0.706062	0.710309
0.549775	0.519138	0.567541	0.535399	0.531635	0.544835	0.566347	0.565685	0.580422	0.520825	0.543741	0.574955	0.578428	0.656203	0.666213	0.59669	0.660473	0.6521	0.65662	0.667938	0.656434	0.703005	0.404622	0.575835	0.595243	0.625273	0.637263	0.629123	0.654653	0.650758
0.560782	0.573802	0.658655	0.681199	0.66185	0.642366	0.678137	0.713456	0.515275	0.466872	0.606238	0.674316	0.709946	0.711548	0.70567	0.703864	0.689702	0.698031	0.719128	0.731077	0.71564	0.70944	0.491373	0.588804	0.671802	0.696472	0.716112	0.717367	0.726838	0.732344
0.551814	0.56679	0.634475	0.663272	0.670849	0.647854	0.676065	0.704091	0.511223	0.46848	0.602634	0.666858	0.706805	0.720544	0.711396	0.720242	0.716925	0.732822	0.737703	0.733944	0.70542	0.69654	0.495483	0.583731	0.653734	0.688863	0.705441	0.697845	0.697894	0.702776
0.703908	0.686904	0.691659	0.572173	0.586285	0.644692	0.684866	0.669611	0.67559	0.695144	0.672004	0.680012	0.689563	0.708351	0.698267	0.701614	0.719987	0.697133	0.688345	0.705623	0.721642	0.706803	0.679041	0.654602	0.659667	0.66923	0.694866	0.689545	0.691055	0.708654
0.132674	0.153001	0.0960202	0.135021	0.146391	0.123683	0.152758	0.128164	0.102269	0.0963305	0.0517759	0.0842519	0.0855481	0.090078	0.0915884	0.0787581	0.105647	0.0823339	0.0717083	0.0800645	0.0646363	0.0647709	0.0661902	0.0683098	0.0719529	0.0546017	0.0493734	0.046608	0.0360651	0.0447088
0.52206	0.569135	0.489969	0.524098	0.400998	0.252583	0.122336	0.097495	0.0741056	0.101635	0.089565	0.118963	0.217884	0.101977	0.15199	0.211474	0.187391	0.233612	0.31465	0.216794	0.287645	0.374701	0.392784	0.386396	0.351003	0.375675	0.511333	0.240864	0.304481	0.33933
0.792312	0.551446	0.71927	0.776777	0.787888	0.573499	0.679833	0.719051	0.46943	0.570051	0.515062	0.740006	0.766511	0.799159	0.771069	0.798448	0.785279	0.815515	0.698283	0.826091	0.828451	0.399497	0.698073	0.709731	0.692799	0.784995	0.809458	0.831309	0.810962	0.690054
0.633341	0.681283	0.717784	0.695026	0.679499	0.704859	0.528052	0.455316	0.373222	0.684721	0.598092	0.701991	0.708819	0.737018	0.729513	0.735362	0.698679	0.733309	0.737701	0.709213	0.680283	0.676789	0.558759	0.721618	0.725389	0.753404	0.754207	0.732632	0.74219	0.774243
0.63842	0.74034	0.743516	0.736128	0.748342	0.736888	0.756971	0.759007	0.546638	0.49552	0.698853	0.779189	0.808322	0.818576	0.791004	0.800675	0.789804	0.797711	0.798234	0.761965	0.761126	0.772647	0.736374	0.789053	0.78491	0.783613	0.794102	0.810973	0.781689	0.805087
0.761535	0.601342	0.648335	0.748547	0.551483	0.514605	0.742039	0.737788	0.76897	0.250589	0.326015	0.696278	0.760276	0.776903	0.766335	0.768202	0.772161	0.815999	0.830197	0.802885	0.75807	0.407993	0.689788	0.766891	0.791416	0.795824	0.801375	0.805285	0.804099	0.755296
0.740416	0.718261	0.71548	0.457864	0.56889	0.618311	0.667329	0.657993	0.677842	0.698917	0.691186	0.700306	0.707536	0.726027	0.712663	0.717497	0.710662	0.693639	0.696421	0.677804	0.701229	0.687562	0.653597	0.64764	0.699122	0.695478	0.694536	0.703136	0.69785	0.707147
0.672769	0.684755	0.547349	0.534555	0.567451	0.660206	0.654596	0.603402	0.67222	0.694342	0.67557	0.670875	0.707811	0.644327	0.656437	0.657388	0.683412	0.626474	0.638643	0.68347	0.679548	0.675657	0.58325	0.651918	0.678615	0.637552	0.70547	0.723636	0.710898	0.710156
0.639097	0.491255	0.499542	0.51513	0.50477	0.597507	0.593874	0.616643	0.61887	0.653617	0.670045	0.683466	0.688088	0.670008	0.593685	0.69325	0.7068	0.647076	0.617015	0.637635	0.67926	0.54977	0.675017	0.715317	0.728242	0.714736	0.726269	0.716699	0.737269	0.749389
0.0826401	0.137627	0.0971761	0.0917981	0.0782643	0.0752006	0.0590914	0.0725855	0.0815253	0.0817357	0.0525252	0.0519044	0.0709368	0.0524199	0.0658051	0.0584609	0.0824628	0.0866551	0.124573	0.0969275	0.0537559	0.0876345	0.0728393	0.0470498	0.0666902	0.058988	0.0611364	0.0925112	0.0795103	0.0834139
0.532041	0.176364	0.135129	0.0993445	0.101429	0.0897394	0.119186	0.157618	0.143747	0.11195	0.0510416	0.0756873	0.0982672	0.122812	0.0859992	0.0799329	0.129342	0.0830734	0.071594	0.0763838	0.0634016	0.0618618	0.066217	0.0763171	0.0801923	0.0534037	0.049356	0.0471312	0.0355653	0.0438542
0.627996	0.630744	0.550119	0.521675	0.586768	0.630848	0.627863	0.61785	0.60186	0.644041	0.621796	0.636874	0.641434	0.648542	0.619102	0.607203	0.610136	0.633822	0.596256	0.598031	0.637199	0.567567	0.606981	0.570798	0.592747	0.657342	0.62907	0.598948	0.620797	0.670445
0.63531	0.645768	0.538397	0.498339	0.547645	0.601852	0.629096	0.633563	0.639626	0.647404	0.675864	0.679219	0.654189	0.658773	0.648921	0.611504	0.65299	0.649821	0.60506	0.619423	0.622799	0.580619	0.632417	0.590829	0.598276	0.696889	0.64489	0.585047	0.610094	0.645479
0.680178	0.690596	0.692117	0.703282	0.695293	0.69325	0.717543	0.72063	0.7255	0.721974	0.710955	0.722715	0.72525	0.707754	0.698395	0.686121	0.670462	0.672067	0.714369	0.703946	0.698875	0.732948	0.761376	0.728516	0.69376	0.711314	0.70792	0.72434	0.723879	0.706867
0.613883	0.608712	0.616189	0.613302	0.606366	0.593513	0.598765	0.597262	0.592361	0.59969	0.593037	0.607716	0.60438	0.602943	0.61543	0.599752	0.577743	0.5882	0.593928	0.596989	0.589477	0.592668	0.604262	0.59986	0.593306	0.582687	0.59001	0.586164	0.584633	0.593373
0.815764	0.781374	0.525564	0.618111	0.150159	0.684814	0.772631	0.786625	0.771544	0.757294	0.167316	0.673757	0.762956	0.725244	0.732228	0.739206	0.757508	0.741332	0.564361	0.780686	0.764245	0.178038	0.516031	0.551054	0.622901	0.669734	0.675331	0.712524	0.694634	0.712501
0.0785756	0.0729909	NaN	0.112641	NaN	0.0820131	0.139216	0.186829	0.0683275	0.123632	NaN	NaN	NaN	NaN	NaN	0.0721616	NaN	0.0673794	NaN	NaN	0.159404	0.07713	NaN	0.100454	0.118809	0.0854352	0.080169	NaN	0.0786661	0.13114
0.117089	0.0917343	0.140751	NaN	0.151976	NaN	0.087343	NaN	0.127925	NaN	NaN	NaN	0.109539	NaN	0.158134	0.0758152	0.103147	0.1034	0.119696	NaN	0.161988	NaN	NaN	0.10825	NaN	0.103467	0.146146	0.0866819	NaN	NaN
0.627627	0.589622	0.592782	0.569841	0.426139	0.672659	0.729683	0.49546	0.500166	0.503789	0.509051	0.513003	0.552919	0.624318	0.60341	0.646284	0.645535	0.658157	0.622309	0.592209	0.612427	0.634786	0.616061	0.61614	0.618742	0.599819	0.608026	0.609618	0.615983	0.58732
0.0593129	0.0691779	0.0819546	0.0669602	0.113458	0.153998	0.292116	0.160447	0.128736	0.096009	0.0833411	0.0972626	0.117452	0.0382614	0.0541376	0.0594258	0.0523865	0.0437941	0.0391465	0.0407919	0.0474978	0.047373	0.0566891	0.0517102	0.0392627	0.0447388	0.0413202	0.0664264	0.0745745	0.0440018
0.727082	0.699731	0.687657	0.524458	0.6316	0.675954	0.690472	0.711847	0.71594	0.714294	0.70731	0.705566	0.712068	0.727625	0.718138	0.704985	0.678377	0.696318	0.711208	0.606271	0.603318	0.665136	0.677331	0.69053	0.651776	0.646542	0.682099	0.698559	0.703646	0.710097
0.791791	0.776092	0.554528	0.623817	0.149387	0.704777	0.783124	0.771893	0.747751	0.736944	0.168162	0.673784	0.736626	0.703146	0.703608	0.717639	0.721168	0.715346	0.564361	0.757875	0.749968	0.178882	0.567685	0.565749	0.652644	0.671459	0.672961	0.711655	0.695506	0.71411
0.492243	0.636024	0.704805	0.718033	0.687899	0.61642	0.694238	0.71047	0.680748	0.565758	0.675543	0.698589	0.709952	0.72376	0.705314	0.714997	0.732367	0.756899	0.770239	0.746939	0.547952	0.661942	0.620821	0.579849	0.680637	0.721474	0.717039	0.717581	0.736902	0.71407
0.666314	0.70616	0.708514	0.635803	0.630234	0.637488	0.67374	0.698834	0.721188	0.683359	0.615799	0.575879	0.657848	0.675245	0.661013	0.666991	0.674034	0.673358	0.68634	0.66461	0.646526	0.451218	0.606133	0.661	0.66713	0.66495	0.651256	0.692303	0.697359	0.72391
0.672287	0.678689	0.6639	0.655142	0.626274	0.64219	0.669348	0.679441	0.693255	0.653488	0.600649	0.586249	0.647884	0.649486	0.674833	0.684924	0.683714	0.691331	0.684112	0.661716	0.634484	0.453759	0.606464	0.652762	0.658125	0.663211	0.640766	0.682629	0.692624	0.711399
0.651181	0.65286	0.682138	0.481683	0.637046	0.696704	0.701023	0.700186	0.712595	0.697542	0.678371	0.673286	0.681758	0.696721	0.692029	0.702331	0.650559	0.660324	0.688905	0.683354	0.697564	0.690821	0.667824	0.649034	0.668539	0.695055	0.674927	0.677411	0.62756	0.653271
0.616186	0.694339	0.700236	0.717929	0.727216	0.688076	0.74016	0.7396	0.728841	0.730769	0.690222	0.710006	0.740908	0.744067	0.749373	0.746221	0.757525	0.787278	0.762232	0.734852	0.607465	0.581852	0.620711	0.659915	0.717943	0.706337	0.735986	0.739441	0.735523	0.761881
0.663638	0.731504	0.75523	0.756223	0.724991	0.615033	0.730886	0.741289	0.745397	0.740804	0.743448	0.739164	0.746086	0.720016	0.722427	0.733967	0.745799	0.741775	0.762739	0.71881	0.589216	0.66034	0.681929	0.664657	0.704132	0.736687	0.720677	0.733389	0.746352	0.751718
0.641361	0.686518	0.704323	0.711598	0.683375	0.604434	0.638182	0.667169	0.671591	0.67861	0.58739	0.635928	0.660336	0.684751	0.702094	0.725818	0.709644	0.707344	0.688408	0.623432	0.632718	0.651697	0.605124	0.631372	0.674499	0.687913	0.718636	0.734897	0.7401	0.750383
0.696477	0.697732	0.726523	0.717156	0.729463	0.723162	0.728179	0.727507	0.698066	0.564111	0.665095	0.710138	0.722667	0.733771	0.722965	0.727324	0.725324	0.670823	0.66021	0.680194	0.624931	0.667764	0.642959	0.677148	0.712482	0.724894	0.724445	0.740076	0.742799	0.743415
0.586863	0.576196	0.593125	0.602499	0.554296	0.568663	0.604277	0.533227	0.472864	0.582269	0.454045	0.598624	0.594424	0.529323	0.53331	0.514843	NaN	0.507122	0.583016	0.613265	0.538623	0.638091	0.66146	0.526844	0.706437	0.733452	0.741576	0.69788	0.719814	0.713669
0.586863	0.576196	0.593125	0.602499	0.554296	0.568663	0.604277	0.533227	0.472864	0.582269	0.454045	0.598624	0.594424	0.529323	0.53331	0.514843	NaN	0.525085	0.574594	0.601144	0.511205	0.593892	0.629103	0.638633	0.611013	0.644477	0.601863	0.621387	0.63208	0.64711
0.706081	0.749751	0.732142	0.72858	0.698692	0.700315	0.681576	0.537363	0.494268	0.092081	0.28194	0.492399	0.527776	0.526929	0.594512	0.594509	0.636895	0.66077	0.64335	0.63056	0.606385	0.253234	0.449679	0.508362	0.575388	0.624619	0.639092	0.602914	0.590909	0.634252
0.357126	0.264422	0.305661	0.325977	0.306674	0.299767	0.301709	0.231573	0.299179	0.288632	0.300415	0.354594	0.368829	0.369548	0.453778	0.352581	0.363599	0.416794	0.41717	0.443055	0.499928	0.42513	0.454531	0.441165	0.457862	0.37342	0.32452	0.284108	0.237955	0.20991
0.535482	NaN	NaN	0.73166	NaN	0.517492	0.461212	0.34271	0.348859	0.336263	0.294618	0.352664	0.262958	0.329214	0.34187	0.368415	0.329817	NaN	0.602536	0.568081	NaN	0.665159	NaN	NaN	NaN	NaN	NaN	NaN	NaN	NaN
0.319377	NaN	0.199114	0.236272	0.162694	0.158749	0.157127	0.189529	0.104189	0.142751	NaN	NaN	NaN	0.33027	0.346995	NaN	0.56685	0.333583	0.301676	NaN	0.263288	0.141899	NaN	0.186614	NaN	NaN	NaN	NaN	NaN	0.136463
0.627666	0.648469	0.655144	0.622902	0.554497	0.622369	0.641363	0.627053	0.523864	0.552645	0.578271	0.630832	0.649355	0.654302	0.646844	0.622707	0.643143	0.651991	0.654624	0.598515	0.621963	0.650581	0.61042	0.621557	0.642036	0.659117	0.665437	0.664438	0.662252	0.662757
0.696359	0.670083	0.612489	0.65771	0.68939	0.706903	0.716358	0.702809	0.472404	0.606493	0.656492	0.670766	0.686864	0.69343	0.703164	0.691473	0.722933	0.662387	0.655375	0.670202	0.629709	0.5594	0.650377	0.667203	0.665791	0.685895	0.690851	0.695542	0.693828	0.709143
0.668123	0.656173	0.578648	0.639143	0.660415	0.662398	0.646524	0.612482	0.559054	0.509445	0.632787	0.685628	0.695769	0.692404	0.70348	0.681734	0.713282	0.68961	0.710432	0.634234	0.601591	0.67408	0.616373	0.699237	0.715628	0.721687	0.722934	0.73548	0.726755	0.743739
0.660387	0.635644	0.565987	0.648653	0.66592	0.659724	0.634753	0.592666	0.552879	0.509991	0.624755	0.672448	0.70202	0.671067	0.685927	0.672431	0.68877	0.672179	0.685999	0.614623	0.591312	0.644633	0.598658	0.682013	0.686709	0.698573	0.693975	0.690627	0.685807	0.700023
0.642762	0.651531	0.673353	0.658429	0.669013	0.668455	0.668067	0.681294	0.375436	0.462651	0.622745	0.683297	0.674519	0.690886	0.683855	0.675706	0.711697	0.682025	0.741745	0.682816	0.646593	0.35872	0.596609	0.708412	0.702183	0.718026	0.729973	0.738931	0.739939	0.75714
0.582058	0.641919	0.660462	0.638318	0.672643	0.673372	0.513938	0.598233	0.596863	0.48781	0.526815	0.62161	0.674584	0.708921	0.736994	0.712303	0.696377	0.614103	0.636721	0.659065	0.683762	0.6606	0.687491	0.707981	0.691126	0.697979	0.703197	0.697736	0.71117	0.705788
NaN	NaN	NaN	0.655293	NaN	NaN	0.585309	0.589858	NaN	NaN	NaN	NaN	0.70297	NaN	0.741866	0.738906	0.772954	0.745652	0.72383	0.627484	0.704812	0.747147	0.651284	0.638437	0.704307	0.712453	0.719995	0.726574	0.732323	0.727121
0.744418	0.748471	0.755893	0.67857	0.667437	0.737355	0.770512	0.786039	0.596828	0.611322	0.722692	0.751012	0.756378	0.753294	0.749733	0.741682	0.779947	0.745494	0.778184	0.764409	0.763813	0.805709	0.784968	0.775438	0.695741	0.745928	0.750739	0.78139	0.777976	0.801886
0.756315	0.731435	0.745362	0.666688	0.665226	0.719284	0.742196	0.761672	0.58276	0.59464	0.724759	0.750807	0.739968	0.743717	0.736477	0.736078	0.769591	0.74406	0.779008	0.769823	0.75395	0.75716	0.753564	0.738878	0.670788	0.724327	0.7147	0.755422	0.751506	0.780099
0.65767	0.700216	0.729538	0.664468	0.638156	0.621433	0.633945	0.540424	0.562785	0.598463	0.588474	0.578878	0.736076	0.772152	0.775751	0.77045	0.766269	0.645346	0.59371	0.625458	0.488246	0.385129	0.564095	0.614763	0.607207	0.639754	0.625348	0.635579	0.659436	0.66511
0.701592	0.71629	0.718837	0.707761	0.564804	0.704703	0.730721	0.380318	0.639432	0.696315	0.693598	0.571689	0.639768	0.698302	0.657931	0.735266	0.78046	0.766051	0.712567	0.660662	0.682588	0.683932	0.608071	0.678563	0.699594	0.722563	0.741524	0.703799	0.737369	0.756236
0.666438	0.564967	0.703597	0.701478	0.710643	0.736554	0.732124	0.423353	0.635781	0.699258	0.521965	0.685047	0.746881	0.747844	0.776092	0.75926	0.826087	0.73922	0.753898	0.631755	0.706534	0.77615	0.716962	0.727492	0.654936	0.708618	0.711022	0.742982	0.75258	0.771417
0.698339	0.722582	0.659163	0.711847	0.705595	0.714065	0.728458	0.59324	0.629205	0.706342	0.678415	0.66199	0.708963	0.70936	0.761271	0.737406	0.788627	0.671236	0.726081	0.71844	0.65505	0.683674	0.661953	0.697514	0.685687	0.694148	0.714256	0.741759	0.748394	0.774385
0.717018	NaN	0.640626	0.709075	0.735355	0.624701	0.164287	0.478012	0.550423	0.587923	0.375019	0.539221	0.762531	0.764685	0.806795	0.801519	0.75238	0.633692	0.545133	0.578205	0.585691	0.463419	0.250152	0.350535	0.56645	0.533058	0.603991	0.583929	0.593624	0.580685
0.815809	0.809959	0.798609	0.793522	0.823946	0.757965	0.730872	0.790782	0.794294	0.774427	0.691877	0.684442	0.756358	0.797827	0.794875	0.826832	0.715341	0.809553	0.818793	0.77818	0.597902	0.767174	0.715672	0.5385	0.642206	0.717068	0.751583	0.743813	0.812279	0.788193
0.411601	NaN	0.84171	NaN	0.814007	0.773335	0.760602	0.849029	0.836838	0.795891	0.568317	0.690441	0.809426	0.71913	0.604442	0.829082	0.617859	0.653736	0.869382	0.799164	0.611843	NaN	0.3855	0.358022	0.405616	0.70704	NaN	0.633202	0.592867	NaN
0.638862	0.611548	0.69176	0.694594	0.699468	0.727722	0.634934	0.668594	0.639066	0.660081	0.651471	0.732863	0.748536	0.786112	0.767083	0.739569	0.798968	0.740497	0.803264	0.785079	0.781611	0.809705	0.325844	0.701757	0.731757	0.768237	0.739583	0.763054	0.73986	0.768165
0.665733	0.691565	0.711836	0.704653	0.686669	0.685017	0.724595	0.620782	0.619499	0.67405	0.60929	0.671938	0.697933	0.676705	0.690202	0.707999	0.7562	0.691238	0.695649	0.684345	0.649375	0.686876	0.687206	0.591586	0.665	0.689213	0.687464	0.69315	0.668497	0.673348
0.674811	0.691989	0.722535	0.719334	0.703277	0.719753	0.726853	0.603932	0.635576	0.691808	0.608865	0.675571	0.714387	0.695858	0.704366	0.741578	0.790442	0.705971	0.680555	0.685691	0.656249	0.725107	0.737063	0.592354	0.703087	0.736867	0.747872	0.748969	0.727201	0.730318
0.721755	0.707364	0.693192	0.686132	0.704681	0.716483	0.671545	0.587903	0.6698	0.704793	0.649184	0.651088	0.738622	0.742354	0.73002	0.745211	0.761675	0.715403	0.771929	0.742027	0.753086	0.762028	0.768299	0.631846	0.695767	0.724788	0.731352	0.755094	0.729204	0.756334
0.698213	0.698194	0.681976	0.669116	0.687786	0.699813	0.658139	0.585363	0.667423	0.698306	0.649046	0.657246	0.730202	0.717719	0.707319	0.702689	0.76132	0.730252	0.770809	0.741903	0.714422	0.758347	0.716018	0.639172	0.685438	0.712373	0.717571	0.758848	0.73001	0.757101
NaN	0.17747	NaN	0.194616	0.311359	0.17908	0.229177	0.290779	NaN	0.404676	NaN	NaN	0.414991	0.298775	0.760827	NaN	NaN	0.341476	0.321076	0.279944	0.298255	0.315571	0.234445	0.529867	0.504439	0.354911	0.304997	0.304926	0.26396	0.265669
0.787842	0.822327	0.811567	0.779329	0.772468	0.757029	0.748236	0.75011	0.78456	0.706145	0.732621	0.791844	0.822957	0.806829	0.80786	0.789109	0.829096	0.743331	0.82775	0.817268	0.802189	0.833312	0.79652	0.806833	0.794845	0.813723	0.804134	0.807609	0.791606	0.805687
0.662577	0.706845	0.738188	0.747109	0.744361	0.694578	0.688267	0.721208	0.753739	0.805972	0.754482	0.643443	0.715147	0.718867	0.750839	0.750453	0.652043	0.741512	0.78641	0.721041	0.675426	0.688767	0.742441	0.708712	0.694979	0.745242	0.739947	0.739439	0.759958	0.726918
0.695838	0.654723	0.742936	0.754444	0.787732	0.79226	0.707144	0.67728	0.716611	0.758269	0.735601	0.671908	0.684774	0.73799	0.713555	0.792638	0.736891	0.783711	0.601053	0.714436	0.616373	0.603973	0.6208	0.656133	0.718981	0.756446	0.765033	0.74907	0.765675	0.754574
0.740773	0.739439	0.741947	0.728114	0.723612	0.723693	0.709385	0.69995	0.720908	0.716317	0.670987	0.692196	0.680948	0.708224	0.714174	0.726517	0.737471	0.725003	0.667254	0.669256	0.693513	0.686273	0.662978	0.657183	0.657001	0.684839	0.705656	0.739196	0.73298	0.738616
0.41654	0.494445	0.388583	0.58284	0.507078	0.400438	NaN	NaN	0.267938	0.623909	0.584079	0.547987	0.563033	0.642831	0.710658	0.742715	0.734734	0.727691	0.480622	0.591152	0.632684	0.645171	0.393588	0.515649	0.601364	0.65954	0.727428	0.699299	0.705345	0.51109
0.583351	0.60618	0.636134	0.650086	0.669057	0.668371	0.664348	0.60724	0.663065	0.70939	0.659338	0.663105	0.654553	0.692383	0.693374	0.678769	0.686961	0.699717	0.705163	0.648155	0.675212	0.686695	0.621667	0.670725	0.685843	0.703048	0.705744	0.708061	0.724233	0.709682
0.324855	0.30798	0.25848	0.313031	0.309224	0.256986	0.2253	0.211312	0.157966	0.155135	0.220531	0.185103	NaN	NaN	NaN	NaN	NaN	NaN	NaN	NaN	0.259526	NaN	NaN	0.288773	0.299576	NaN	NaN	0.179731	0.185712	0.144118
0.622439	0.619436	0.648214	0.467751	0.562094	0.647674	0.681903	0.673728	0.686353	0.682597	0.691945	0.677116	0.667077	0.66188	0.66134	0.677768	0.708462	0.673649	0.67668	0.690276	0.686047	0.700294	0.688845	0.692293	0.663228	0.677553	0.684315	0.698879	0.700853	0.695809
0.679596	0.672571	0.653311	0.482328	0.581791	0.682631	0.730568	0.724633	0.721222	0.727258	0.695474	0.619955	0.614478	0.677707	0.671268	0.681187	0.714522	0.70974	0.681395	0.686336	0.676966	0.648412	0.64058	0.648269	0.612394	0.668025	0.680771	0.684237	0.692142	0.673445
0.7276	0.667315	0.559873	0.640534	0.669805	0.76767	0.76934	0.759718	0.805655	0.776762	0.803457	0.813567	0.791565	0.769312	0.776246	0.748756	0.712791	0.728599	0.702455	0.753879	0.766378	0.753032	0.677889	0.733497	0.724228	0.746405	0.771836	0.750584	0.727667	0.735115
NaN	0.48696	0.403859	0.431819	0.419396	0.442401	0.465399	0.519301	0.45019	0.363943	0.283682	0.424989	0.425885	0.489265	0.472486	0.439058	0.482855	0.404472	0.386597	0.393498	0.537597	0.373315	0.350024	0.286053	0.298461	0.570947	0.584037	0.559452	NaN	NaN
NaN	0.48696	0.403859	0.431819	0.419396	0.442401	0.465399	0.519301	0.45019	0.363943	0.283682	0.424989	0.425885	0.489265	0.472486	0.439058	0.482855	0.404472	0.386597	0.393498	0.537597	0.373315	0.350024	0.286053	0.298461	NaN	NaN	NaN	NaN	NaN
0.689865	0.666764	0.71404	0.727363	0.744219	0.578248	0.619553	0.73534	0.760352	0.756608	0.725876	0.6216	0.694838	0.701635	0.682465	0.737006	0.7299	0.650973	0.692515	0.749886	0.748789	0.671051	0.716727	0.767706	0.767111	0.743731	0.74039	0.785499	0.778992	0.767837
0.463517	0.408164	0.531157	0.648936	0.712751	0.65652	0.618572	0.574433	0.50061	0.280932	0.335468	0.542823	0.631208	0.634838	0.638227	0.699424	0.722723	0.709739	0.642904	0.63918	0.67415	0.724121	0.57469	0.577041	0.641486	0.550666	0.576364	0.595339	0.440044	0.61642
0.619748	0.541644	0.586169	0.628887	0.598175	0.536097	0.595283	0.636976	0.682514	0.713265	0.699788	0.633375	0.658843	0.655285	0.72042	0.699118	0.658958	0.654557	0.678752	0.698912	0.696082	0.669696	0.647048	0.670125	0.666116	0.626363	0.634977	0.666438	0.661546	0.652879
0.682691	0.73334	0.649934	0.598308	0.513696	0.553411	0.60135	0.514297	0.394145	0.558745	0.582842	0.566489	0.294738	0.370473	0.555394	0.540429	0.617727	0.642215	0.339578	0.274313	0.357018	0.412234	0.41939	0.299522	0.253042	0.410537	0.607556	0.572552	0.498004	NaN
0.657371	0.737653	0.651946	0.597815	0.513552	0.540144	0.607199	0.509902	0.393748	0.560993	0.579665	0.557949	0.29019	0.371945	0.548335	0.617948	0.632971	0.640232	0.302885	0.241333	0.348166	0.430739	0.407677	0.301607	0.264517	0.431079	0.60647	0.568458	0.487916	NaN
0.618347	0.622826	0.543735	0.555609	0.531474	0.575731	0.637556	0.673386	0.653911	0.655008	0.6525	0.659005	0.624115	0.639903	0.672002	0.649738	0.657298	0.676829	0.621285	0.647215	0.691332	0.679328	0.67285	0.653463	0.672709	0.661599	0.653758	0.660796	0.666098	0.683496
0.674231	0.65053	0.611921	0.559873	0.673973	0.629591	0.626037	0.628551	0.623314	0.652429	0.61427	0.578792	0.642279	0.670693	0.626965	0.596084	0.647002	0.664769	0.573106	0.631672	0.704926	0.639187	0.680692	0.686869	0.67083	0.695966	0.698828	0.702867	0.703202	0.699672
0.730982	0.650751	0.706275	0.610518	0.624909	0.616049	0.575141	0.608143	0.576367	0.612562	0.606947	0.630917	0.652951	0.663974	0.662486	0.673967	0.5041	0.625057	0.618611	0.652707	0.577005	0.359258	NaN	0.437761	0.521472	0.394656	0.522701	0.534497	0.385123	0.570699
0.601914	0.463093	0.618016	0.632474	0.699572	0.599943	0.570895	0.585061	0.421205	NaN	NaN	0.571928	0.581869	0.579362	NaN	0.521528	0.494003	0.440813	0.618509	0.657919	0.545113	0.472874	0.416844	0.437015	0.534072	0.384681	0.533137	0.562397	0.424884	0.615942
0.699331	0.699076	0.696427	0.730172	0.759956	0.73151	0.759342	0.789872	0.75687	0.783153	0.766902	0.744995	0.7158	0.752774	0.753348	0.739764	0.775861	0.775511	0.768019	0.759791	0.74308	0.737257	0.757624	0.768009	0.770266	0.732547	0.759193	0.745734	0.689292	0.748365
0.628363	0.640998	0.561728	0.605271	0.637212	0.510893	0.543186	0.605762	0.598444	0.605882	0.614566	0.555062	0.554189	0.590508	0.605855	0.624743	0.627512	0.56978	0.632284	0.644176	0.57778	0.591757	0.639454	0.641668	0.572562	0.607685	0.638954	0.642091	0.665956	0.635429
0.676875	0.647393	0.601591	0.574306	0.548059	0.581254	0.606833	0.601158	0.638015	0.662491	0.701827	0.689241	0.675869	0.627772	0.651039	0.659676	0.662034	0.65518	0.661725	0.660063	0.641777	0.576826	0.619692	0.638897	0.643348	0.594788	0.596043	0.621473	0.643936	0.642877
0.740692	0.704655	0.68916	0.681349	0.688908	0.624098	0.466525	0.629706	0.677758	0.659851	0.539489	0.694909	0.698478	0.681273	0.640103	0.687663	0.686211	0.698838	0.671038	0.625951	0.673853	0.674711	0.655435	0.634092	0.672941	0.680359	0.681217	0.704871	0.696853	0.663985
0.720679	0.655974	0.57465	0.637469	0.433213	0.548063	0.654954	0.708236	0.719238	0.758424	0.733638	0.747892	0.56385	0.572442	0.704706	0.738509	0.780249	0.757488	0.746133	0.648483	0.715034	0.750136	0.764113	0.761923	0.647188	0.723394	0.745919	0.763606	0.779023	0.762932
0.674558	0.719942	0.722762	0.648632	0.544278	0.629839	0.665902	0.733853	0.755258	0.766743	0.657558	0.701831	0.749736	0.751836	0.595097	0.672036	0.763968	0.767387	0.764303	0.747696	0.741102	0.741429	0.744946	0.735191	0.718257	0.764825	0.781064	0.769576	0.752811	0.625726
0.647366	0.641741	0.549933	0.543537	0.567553	0.637226	0.679654	0.724329	0.737934	0.687255	0.681295	0.720868	0.702031	0.711439	0.66427	0.652855	0.680846	0.689165	0.667839	0.662328	0.684632	0.676853	0.633685	0.670688	0.691253	0.654754	0.669786	0.681551	0.680722	0.677129
0.54754	0.564863	0.531432	0.562612	0.540673	0.561746	0.637624	0.671318	0.636145	0.654826	0.667989	0.663546	0.66536	0.524946	0.592515	0.643644	0.70988	0.618202	0.633032	0.636769	0.623458	0.626292	0.65396	0.624088	0.633648	0.627365	0.623485	0.620144	0.62027	0.625999
0.65557	0.663924	0.460187	0.510687	0.618816	0.650214	0.668356	0.67884	0.69215	0.695358	0.690511	0.701999	0.703423	0.680478	0.605349	0.662375	0.694268	0.687569	0.680208	0.687977	0.697292	0.691105	0.681479	0.695174	0.685114	0.69391	0.683293	0.692389	0.689973	0.697587
0.57832	0.600812	0.522819	NaN	0.586606	0.619545	0.622897	0.642902	0.649033	0.666466	0.650179	0.641045	0.660561	0.674595	0.620983	0.639427	0.639065	0.628363	0.61403	0.589564	0.618351	0.599232	0.616485	0.58895	0.597785	0.597298	0.586053	0.604452	0.607971	0.611617
0.795927	0.794251	0.762309	0.510034	0.700894	0.744083	0.754755	0.765188	0.767867	0.76861	0.787595	0.796897	0.79979	0.800038	0.789098	0.794307	0.790587	0.783241	0.777623	0.76807	0.772393	0.778064	0.76934	0.779417	0.765923	0.76672	0.765129	0.7814	0.783185	0.783809
0.677021	0.719683	0.438696	0.513575	0.599179	0.684325	0.701147	0.739918	0.761931	0.770776	0.761644	0.777251	0.759629	0.766361	0.75006	0.729908	0.689556	0.68565	0.70303	0.675237	0.705426	0.684341	0.669788	0.705173	0.664798	0.635217	0.648483	0.649658	0.676309	0.699617
0.754786	0.733054	0.708944	0.680635	0.70346	0.708695	0.579735	0.643241	0.707266	0.732209	0.729041	0.710661	0.643185	0.677733	0.731933	0.710924	0.704068	0.692732	0.709488	0.701427	0.729466	0.684991	0.705588	0.720015	0.72095	0.719289	0.673627	0.697219	0.711554	0.710159
0.740154	0.730042	0.717281	0.687567	0.713596	0.701894	0.580441	0.647494	0.712295	0.72131	0.710228	0.703122	0.704527	0.719867	0.746162	0.75578	0.701868	0.662317	0.661959	0.676794	0.653953	0.591248	0.628896	0.641285	0.649137	0.643324	0.615825	0.623544	0.64858	0.712577
0.699199	0.616127	0.583172	0.63673	0.53806	0.497266	0.618805	0.69026	0.713973	0.724041	0.65708	0.628307	0.577743	0.625005	0.650657	0.676539	0.687669	0.684696	0.658859	0.659675	0.667489	0.672436	0.643065	0.614566	0.624346	0.687809	0.687959	0.702523	0.681862	0.684577
0.66913	0.677694	0.66488	0.475156	0.568551	0.598457	0.66914	0.692637	0.705612	0.721285	0.733173	0.743006	0.759075	0.740442	0.730817	0.725653	0.752008	0.709325	0.736084	0.733851	0.69997	0.696584	0.650783	0.628358	0.666697	0.712543	0.717318	0.723357	0.715472	0.712084
0.712258	0.72386	0.701817	0.588545	0.582691	0.66302	0.705567	0.708257	0.737612	0.730527	0.726994	0.747599	0.751459	0.74928	0.744067	0.725504	0.749154	0.733129	0.728488	0.729763	0.734512	0.726438	0.721615	0.60073	0.65531	0.703843	0.708016	0.697893	0.675328	0.685334
0.688023	0.657733	0.34453	0.481526	0.608717	0.635562	0.638217	0.667034	0.697557	0.704254	0.685425	0.708809	0.695424	0.692428	0.539459	0.644148	0.690649	0.694425	0.70322	0.679509	0.577364	0.681358	0.704609	0.681905	0.659058	0.670842	0.685351	0.652072	0.639626	0.660899
0.684531	0.66842	0.392239	0.427289	0.466062	0.630534	0.667679	0.697322	0.699726	0.707814	0.669441	0.712984	0.728654	0.48007	0.603125	0.703223	0.743879	0.727139	0.770353	0.650966	0.615234	0.668091	0.709244	0.676826	0.645203	0.626435	0.628836	0.601932	0.583229	0.583977
0.685994	0.713904	0.411618	0.492581	0.578811	0.685648	0.675684	0.798129	0.829765	0.792929	0.762334	0.774778	0.792723	0.751839	0.640743	0.739335	0.797731	0.739807	0.747147	0.702824	0.700839	0.70601	0.661499	0.66404	0.647162	0.61386	0.576344	0.580347	0.590628	0.581875
0.654953	0.668039	0.428542	0.530317	0.501268	0.62502	0.675202	0.698964	0.714607	0.702196	0.697973	0.697775	0.688597	0.689358	0.681325	0.678646	0.681292	0.660622	0.664455	0.669831	0.670991	0.645305	0.647787	0.656695	0.655069	0.645257	0.645497	0.628397	0.658133	0.669566
0.66174	0.67476	0.23412	0.423935	0.556654	0.632673	0.675528	0.710471	0.725536	0.706195	0.69124	0.720937	0.697809	0.686057	0.651776	0.630084	0.670625	0.640009	0.672749	0.634552	0.591505	0.637804	0.652107	0.656249	0.623439	0.633434	0.618075	0.609413	0.621325	0.630476
0.732172	0.704187	0.471845	0.454999	0.554636	0.640803	0.663449	0.686685	0.71708	0.738794	0.75369	0.767146	0.743851	0.747433	0.737229	0.749238	0.758612	0.728821	0.743641	0.721106	0.732211	0.728279	0.695144	0.706244	0.657866	0.665176	0.704171	0.706595	0.70561	0.705943
0.678983	0.454976	0.701251	0.750154	0.695883	0.666368	0.646961	0.646654	0.642661	0.633091	0.650476	0.653006	0.666118	0.655127	0.644575	0.641396	0.643106	0.638403	0.653208	0.627002	0.62801	0.66865	0.662856	0.65389	0.666618	0.665196	0.65962	0.655033	0.657183	0.617964
0.636875	0.585275	0.705706	0.724603	0.760298	0.688327	0.690852	0.653692	NaN	0.595893	NaN	0.705501	0.718066	0.719296	0.682209	0.667387	0.6936	0.66727	0.414412	0.64362	0.690105	0.66607	0.676084	0.621836	0.634311	0.641729	0.630248	0.593023	0.613106	0.580384
0.736252	0.702703	0.68561	0.662257	0.634674	0.646422	0.676228	0.704316	0.698882	0.719343	0.715996	0.727137	0.731977	0.728247	0.731875	0.731108	0.746053	0.745464	0.678248	0.670908	0.711792	0.705748	0.679882	0.70382	0.706231	0.728666	0.7229	0.723329	0.718051	0.729635
0.717402	0.703161	0.67925	0.6596	0.623124	0.656722	0.690049	0.714455	0.704394	0.717084	0.723834	0.740325	0.73553	0.734058	0.715568	0.717863	0.74055	0.72996	0.667177	0.664428	0.704707	0.707103	0.678204	0.706338	0.706462	0.728666	0.72224	0.72653	0.719646	0.719717
0.533719	0.49101	0.487293	0.521902	0.494639	0.490101	0.47765	0.500833	0.547493	0.553561	0.536206	0.5252	NaN	0.51074	0.514247	0.5325	0.539744	0.500234	0.530238	0.532003	0.535547	0.506073	0.525898	0.539095	0.529186	0.518835	0.519717	0.547415	0.536511	NaN
0.380681	NaN	0.353918	0.3876	0.625807	NaN	NaN	NaN	NaN	NaN	NaN	NaN	NaN	NaN	NaN	NaN	NaN	NaN	NaN	NaN	NaN	NaN	NaN	NaN	NaN	NaN	NaN	NaN	NaN	NaN
0.604978	0.688805	0.204899	0.41754	0.197214	0.237808	0.268484	0.268895	0.227495	NaN	0.331775	0.221409	0.11418	0.090132	NaN	NaN	0.236996	0.2008	0.47734	0.400116	0.532799	0.199479	0.407945	0.526983	0.368124	NaN	0.407705	0.124892	0.283637	NaN
0.563639	0.596541	0.558184	0.58016	0.480055	NaN	0.349326	0.458099	0.567526	0.589985	0.615108	0.614689	0.605381	NaN	NaN	NaN	NaN	0.596635	NaN	0.643258	0.644648	0.637814	0.653773	NaN	NaN	NaN	0.6317	NaN	0.727212	0.68863
0.497481	0.579958	0.586658	0.556687	0.567592	0.617148	0.586356	0.563064	0.584506	0.601101	0.611694	0.60581	0.632179	0.61083	0.606453	0.633782	0.63897	0.605601	0.599322	0.641072	0.639806	0.627069	0.6619	0.636009	0.649778	0.667493	0.692922	0.693765	0.727467	0.694511
0.566957	0.562214	0.564282	0.577593	0.578039	0.568418	0.542476	0.571372	0.56651	0.572592	0.591133	0.561284	0.580089	0.57844	0.580483	0.573278	0.574662	0.5746	0.574752	0.579098	0.554017	0.56344	0.577084	0.527204	0.544423	0.525641	0.549041	0.546113	0.567887	0.583873
0.56767	0.56641	0.564168	0.57497	0.575475	0.565351	0.539507	0.573994	0.56651	0.575889	0.591133	0.561284	0.582712	0.587034	0.586827	0.58152	0.584843	0.580935	0.59308	0.592324	0.553861	0.567532	0.583215	0.54886	0.579326	0.575821	0.555722	0.559264	0.568497	0.584702
0.607184	0.606607	0.588676	0.595104	0.58602	0.578804	0.583375	0.592372	0.586482	0.601797	0.599653	0.591748	0.593652	0.593436	0.59038	0.556939	0.598073	0.623702	0.626927	0.603363	0.62146	0.609071	0.592493	0.620011	0.629791	0.623614	0.627264	0.643881	0.638622	0.619259
0.236727	0.0792246	0.269054	0.298012	0.353911	0.264294	0.306192	0.360948	0.313847	0.13208	0.305975	0.151424	NaN	NaN	0.234339	0.214916	0.352358	0.373862	0.306924	0.412473	0.415959	0.454377	0.441553	0.423972	0.465425	0.469961	0.487454	NaN	0.189735	0.163827
0.486786	0.333993	0.401594	0.311052	0.345798	0.248716	0.35928	0.321546	0.310442	0.146953	0.292262	0.124403	0.351478	0.445519	0.380572	0.33645	0.351568	0.388101	0.28518	0.273826	0.311513	0.25503	0.293654	0.420478	0.397629	0.48512	0.396743	0.341118	0.333387	0.267142
0.428543	NaN	0.325318	0.304874	0.331012	0.187786	0.146419	0.379615	0.312324	0.17001	0.167402	0.296583	0.305754	0.375998	0.371	0.313658	0.263717	0.315024	0.197935	0.180994	0.206498	0.272635	0.336128	0.345483	0.522927	0.437287	0.346741	0.285569	0.375734	0.326211
0.271747	0.285723	0.208993	0.220172	0.19817	0.165012	0.212727	0.25303	0.159995	0.131862	0.406877	0.205867	0.116603	0.341192	0.370354	0.122011	0.100257	0.229996	0.192531	0.129502	0.0745288	0.10948	0.109607	0.106742	0.0795737	0.0923779	0.0889579	0.09041	0.137295	0.21268
NaN	NaN	0.241928	0.251805	0.18737	0.22899	0.268629	0.207369	0.186718	0.153412	0.160041	0.126749	0.111401	0.119878	0.107135	0.11674	0.131695	0.106964	0.107711	0.121514	0.0893452	0.0803254	0.0809258	0.0871089	0.0631022	0.0914684	0.0788956	0.114623	0.144819	0.183083
0.657356	0.675432	0.676538	0.660665	0.594676	0.620507	0.65785	0.70251	0.709736	0.705514	0.716994	0.738235	0.746174	0.746387	0.7209	0.711072	0.721518	0.749689	0.735234	0.726711	0.732103	0.730769	0.716759	0.683143	0.685485	0.716782	0.726523	0.709339	0.67796	0.697315
0.698964	0.686644	0.697433	0.520672	0.562795	0.592831	0.624429	0.668596	0.681085	0.66031	0.683845	0.703536	0.690728	0.745359	0.732115	0.70483	0.718939	0.770759	0.753081	0.749754	0.749165	0.749575	0.743115	0.71763	0.707679	0.729727	0.737949	0.723809	0.684474	0.711872
0.701398	0.695377	0.671757	0.55693	0.530803	0.552284	0.614653	0.63852	0.662652	0.678101	0.656313	0.675842	0.664472	0.645443	0.62589	0.648187	0.688261	0.698428	0.690034	0.685782	0.720712	0.720367	0.680913	0.657249	0.69615	0.742865	0.731887	0.745154	0.729171	0.728346
0.722497	0.717583	0.651722	0.517562	0.626176	0.704095	0.746422	0.763592	0.755371	0.756772	0.759117	0.757655	0.768486	0.750314	0.738236	0.73963	0.748181	0.735096	0.718096	0.72298	0.722416	0.721063	0.703192	0.677045	0.62916	0.679897	0.690725	0.693131	0.615113	0.664138
0.711925	0.696169	0.456871	0.495005	0.546309	0.624704	0.675389	0.702305	0.716053	0.723785	0.726663	0.740874	0.733231	0.731809	0.709127	0.70325	0.702687	0.693914	0.706631	0.72442	0.723039	0.721147	0.709947	0.70541	0.705883	0.702319	0.705002	0.700807	0.699746	0.70141
0.705036	0.714837	0.649583	0.534243	0.604949	0.714254	0.747088	0.758391	0.737533	0.735507	0.764151	0.795703	0.793573	0.790109	0.754951	0.743008	0.73783	0.729612	0.710801	0.70874	0.729137	0.732261	0.701924	0.683143	0.664567	0.693523	0.703033	0.709339	0.672674	0.680869
0.703714	0.69237	0.695572	0.52354	0.527809	0.571365	0.621536	0.667234	0.681669	0.658316	0.680352	0.702865	0.685668	0.748016	0.732042	0.706148	0.705324	0.74485	0.71656	0.702431	0.687451	0.680311	0.681957	0.68598	0.695298	0.706458	0.692784	0.693049	0.697238	0.709487
0.692965	0.685916	0.690301	0.543171	0.497369	0.54695	0.627445	0.652214	0.669973	0.704105	0.681106	0.685711	0.690916	0.701156	0.694703	0.669855	0.649842	0.680851	0.689562	0.678454	0.700822	0.652638	0.669601	0.68384	0.672834	0.678585	0.68307	0.658333	0.66819	0.653695
0.670273	0.669604	0.638668	0.502107	0.59259	0.60513	0.646648	0.667974	0.690753	0.688614	0.675539	0.672181	0.67689	0.676064	0.652649	0.656724	0.648779	0.633313	0.64786	0.642723	0.637123	0.647363	0.640245	0.643241	0.602029	0.567717	0.611437	0.640437	0.65028	0.652522
0.74725	0.758321	0.771036	0.500203	0.53489	0.623375	0.671425	0.710975	0.705746	0.759422	0.717259	0.713982	0.717235	0.731596	0.718621	0.694295	0.702207	0.723204	0.697623	0.696595	0.683325	0.627692	0.616	0.640211	0.646481	0.639317	0.613999	0.649901	0.655554	0.667476
0.388539	0.439165	0.449851	0.440658	0.463147	0.466695	0.455799	0.383662	0.41129	0.254416	0.401804	0.401604	0.377169	0.371339	0.408247	0.404331	0.339915	0.39553	0.390087	0.378939	0.388364	0.462228	0.405741	0.415862	0.46452	0.478128	0.423972	0.459629	0.456376	0.487456
0.683594	0.688089	0.686088	0.479003	0.577108	0.657247	0.675453	0.679061	0.690545	0.680303	0.679648	0.686667	0.67911	0.683598	0.67289	0.677169	0.66175	0.656024	0.669751	0.675062	0.681798	0.680759	0.674219	0.676115	0.653078	0.637907	0.66584	0.680037	0.674758	0.6746
0.701306	0.698113	0.689253	0.690735	0.623218	0.581853	0.62778	0.662774	0.690104	0.719972	0.685919	0.676486	0.712722	0.704429	0.674381	0.650774	0.651556	0.66139	0.655305	0.634345	0.650916	0.635215	0.663492	0.647594	0.657734	0.645823	0.63514	0.654858	0.651502	0.617258
0.685438	0.68756	0.685978	0.539001	0.543738	0.626989	0.626429	0.691114	0.718567	0.734392	0.720422	0.734264	0.738026	0.749382	0.742638	0.738567	0.753967	0.745667	0.74461	0.737378	0.739286	0.730247	0.743209	0.730587	0.73616	0.739275	0.733907	0.727733	0.712339	0.696987
0.291825	0.201314	NaN	NaN	NaN	NaN	NaN	NaN	0.231713	0.130276	0.187402	NaN	NaN	0.170215	0.230157	NaN	NaN	NaN	0.189463	NaN	0.143285	0.187041	0.121093	0.130414	0.162685	NaN	0.214509	0.170675	0.189745	0.186255
NaN	NaN	NaN	NaN	0.595762	0.601705	0.655086	0.689353	0.725474	0.745522	0.638921	NaN	NaN	NaN	0.509203	0.447095	0.435351	0.453232	NaN	0.612372	NaN	NaN	0.480934	NaN	NaN	NaN	NaN	NaN	0.473394	0.497052
0.666559	0.640741	NaN	NaN	0.616662	0.685646	0.694299	0.70444	0.745391	0.767224	0.767262	0.770309	NaN	NaN	NaN	0.572172	0.437481	NaN	NaN	NaN	NaN	0.63539	NaN	NaN	NaN	NaN	0.562433	0.711431	0.74398	0.759967
NaN	0.707752	0.702353	0.690116	0.682841	0.514045	0.586653	0.618501	0.61926	0.663595	0.645444	0.645434	0.68841	0.652239	0.639009	0.678547	0.690263	0.67488	0.677839	0.677089	0.679422	0.678204	0.660538	0.675584	0.645711	0.666221	0.650278	0.634184	0.641755	0.665735
0.683885	0.695159	0.685476	0.677494	0.468274	0.454277	0.493428	0.557933	0.589581	0.57411	0.626582	0.603333	0.566627	0.566888	0.581968	0.643779	0.638313	0.553267	0.561089	0.572002	0.616727	0.611115	0.619069	0.590297	0.600091	0.618097	0.631913	0.55017	0.628377	0.559247
0.648744	0.634243	0.629274	0.640175	0.636754	0.530348	0.592142	0.619389	0.632304	0.650604	0.596181	0.559794	0.605757	0.586852	0.573492	0.620542	0.606257	0.569915	0.587908	0.612058	0.628343	0.611435	0.649204	0.626669	0.648019	0.646776	0.599259	0.640167	0.667795	0.65862
0.47128	0.675232	0.583955	0.573123	0.456999	0.437563	0.481559	0.562501	0.592501	0.572667	0.621002	0.588956	0.571042	0.564643	0.575754	0.612339	0.614148	0.555078	0.565222	0.568038	0.606353	0.594203	0.539168	0.606502	0.615436	0.645589	0.590142	0.55106	0.559598	0.485431
0.268905	0.280413	0.295852	0.340644	0.370373	0.344032	0.373183	0.348095	0.401798	0.373131	0.368722	0.35869	0.33099	NaN	0.373265	0.382227	0.395701	0.340198	0.372127	0.80313	0.357296	0.356871	0.369264	0.590175	0.375943	NaN	0.556327	NaN	NaN	NaN
0.381475	0.365768	0.34578	0.324665	0.353477	0.264017	NaN	NaN	NaN	NaN	NaN	NaN	NaN	NaN	NaN	NaN	NaN	NaN	NaN	NaN	NaN	NaN	NaN	NaN	0.60888	NaN	NaN	0.577021	NaN	NaN
0.313114	0.243281	0.266679	0.290403	0.300793	0.197335	0.241596	0.250903	0.224909	0.21394	0.226913	0.26911	NaN	NaN	NaN	NaN	0.662068	NaN	NaN	NaN	NaN	NaN	NaN	NaN	NaN	0.197422	0.216227	0.643312	0.152512	0.212754
0.613676	0.612807	0.506659	0.457666	0.504514	0.532172	0.545831	0.583895	0.617997	0.610982	0.599347	0.611437	0.609879	0.626791	0.636385	0.666748	NaN	0.657059	0.657475	0.646708	0.660162	0.64594	0.647039	0.663626	0.59689	NaN	0.613251	NaN	0.633912	0.208542
0.7179	0.700778	0.691867	0.689966	0.630852	0.580959	0.63496	0.692176	0.699811	0.751492	0.703225	0.68405	0.703021	0.716853	0.702196	0.685269	0.683853	0.68754	0.67531	0.66312	0.665448	0.657289	0.700105	0.672468	0.691141	0.677648	0.661734	0.676985	0.677385	0.637514
0.298587	NaN	NaN	NaN	0.187031	NaN	NaN	0.303769	0.322634	0.169931	NaN	0.259974	0.299462	0.181455	0.648936	0.624153	0.135372	0.144137	0.102679	0.11076	0.251451	NaN	0.538405	NaN	NaN	NaN	0.286068	NaN	0.210416	0.218505
0.638439	0.0624433	0.566574	0.433346	0.554535	0.563622	0.534696	0.686664	0.159347	0.66793	0.634378	0.701764	0.695223	0.704436	0.673428	0.62266	0.695418	0.702092	0.705527	0.705067	0.712157	0.675536	0.665909	0.652945	0.648541	0.637004	0.660357	0.671369	0.674872	0.642955
0.69039	0.677895	0.685909	0.67666	0.623761	0.543613	0.616295	0.665136	0.675084	0.715149	0.695119	0.6799	0.696383	0.680389	0.674808	0.644341	0.659197	0.658432	0.619689	0.607791	0.628771	0.61628	0.63139	0.626721	0.654609	0.655257	0.644756	0.645532	0.64784	0.642217
0.614709	0.580417	0.520836	0.462657	0.517559	0.531684	0.546019	0.684135	0.648603	0.641213	0.601825	0.681485	0.671685	0.677569	0.647057	0.618643	0.663967	0.666212	0.671197	0.679726	0.687412	0.677949	0.683713	0.675137	0.649404	0.629424	0.649794	0.666181	0.674863	0.661486
0.670503	0.672413	0.525634	0.488507	0.565634	0.623963	0.636851	0.659786	0.662767	0.654071	0.644735	0.647943	0.641538	0.662881	0.648824	0.61264	0.607853	0.631067	0.66219	0.600008	0.627794	0.661994	0.63185	0.640568	0.655869	0.642039	0.672541	0.656917	0.672833	0.664576
0.667522	0.691493	0.545398	0.423915	0.592219	0.642009	0.651575	0.672144	0.705205	0.696084	0.686904	0.673154	0.676154	0.705036	0.687397	0.633538	0.615473	0.6659	0.69201	0.634972	0.66559	0.66835	0.661619	0.67521	0.670033	0.647775	0.668461	0.678234	0.671656	0.672379
0.733971	0.733791	0.323311	0.486857	0.523188	0.625878	0.660281	0.700748	0.73172	0.746243	0.746019	0.761878	0.738923	0.679004	0.672529	0.661036	0.701681	0.67983	0.695534	0.673073	0.649434	0.674705	0.689667	0.691425	0.703412	0.692791	0.674214	0.680205	0.697309	0.695697
0.675168	0.635244	0.680266	0.694149	NaN	0.696808	0.666321	0.621551	NaN	NaN	0.603169	0.543061	0.414369	0.378733	0.389682	0.440454	0.422892	0.447112	0.429409	0.821125	NaN	0.607196	0.620673	NaN	0.642353	0.657574	0.650992	0.685007	0.656193	0.662225
0.654084	0.63439	0.647168	0.635359	0.593434	0.638264	0.676243	0.686559	0.685388	0.706402	0.698151	0.708002	0.694608	0.694031	0.686343	0.616049	0.618334	0.643764	0.650279	0.644625	0.635356	0.646152	0.651825	0.662462	0.634304	0.655411	0.66615	0.681649	0.660051	0.675553
0.771261	0.758787	0.757092	0.73301	0.685613	0.682828	0.694478	0.691976	0.709666	0.736067	0.729709	0.726911	0.671192	0.683205	0.723893	0.723292	0.717759	0.702011	0.694491	0.678496	0.694576	0.676161	0.675419	0.688027	0.645197	0.664453	0.656861	0.656526	0.672801	0.677078
0.335307	0.342493	0.349677	0.376048	0.378736	0.389934	0.363673	0.370978	0.335025	0.348215	0.369846	0.374987	0.394105	0.361174	0.349686	0.381263	0.319117	0.354356	0.354726	0.684544	NaN	NaN	0.3305	0.38459	0.389634	0.178227	NaN	0.651991	0.732046	0.752695
0.690201	0.694157	0.69334	0.643676	0.591153	0.569623	0.68021	0.664896	0.736515	0.725002	0.693045	0.710922	0.669945	0.671167	0.718216	0.707401	0.697102	0.693032	0.69031	0.725689	0.742549	0.759327	0.719205	0.762538	0.725229	0.718696	0.660097	0.67337	0.640927	0.693376
0.210812	0.274113	NaN	0.611599	0.181635	0.237237	0.385996	0.286018	0.290658	0.298046	0.735421	0.71798	0.380357	0.369826	0.375389	0.346922	0.378649	0.454859	0.442271	0.460949	0.406181	0.491992	0.540479	0.472984	0.475013	0.440858	0.430097	0.35494	0.410777	0.417076
0.648033	0.651676	0.640621	0.585173	0.610432	0.625718	0.632785	0.644767	0.645253	0.651552	0.63741	0.647316	0.63039	0.635163	0.633141	0.633089	0.602358	0.59919	0.628927	0.646585	0.639807	0.635034	0.633499	0.630319	0.62445	0.639444	0.646158	0.652231	0.646547	0.632587
0.383058	0.369802	0.397285	0.368485	0.368053	0.279811	0.221327	0.306265	0.370227	0.452874	0.508687	0.561637	0.469176	0.483309	0.496813	0.447112	0.429238	0.373011	0.452287	NaN	0.469658	0.471627	0.499586	0.462465	0.479143	0.461435	0.442877	0.468043	0.431805	0.48965
0.45031	0.496433	0.46597	0.32362	0.409587	0.472328	0.406236	0.456268	0.477212	0.46618	0.513791	0.493739	0.495573	0.496629	0.511809	0.442258	0.418675	0.496696	0.530851	0.526821	0.527422	0.513803	0.457841	0.478737	0.443993	0.407655	0.458593	0.542323	0.551566	0.573681
0.69776	0.711678	0.340373	0.312915	0.6023	0.690898	0.710696	0.740272	0.770412	0.744412	0.764427	0.84512	0.701505	0.20875	0.289612	0.315795	0.323495	0.316796	0.339958	0.314201	0.342076	0.289693	0.305868	0.218613	0.303288	0.291901	0.330349	NaN	0.684069	NaN
0.281299	0.323336	0.34078	0.341258	0.345187	0.339689	0.355668	0.325425	0.314028	0.299808	0.317706	0.344543	0.355645	0.344866	0.342959	0.366765	0.338202	0.340696	0.360372	0.357193	0.359214	0.352745	0.334225	0.372781	0.382708	0.392946	0.391714	0.371177	0.400416	0.422723
0.622518	0.485026	0.666354	0.64417	0.710088	0.456575	0.377754	0.598064	0.702836	0.68674	0.617919	0.645677	0.739514	0.653366	0.707956	0.664227	0.666764	0.673324	0.633443	0.667537	0.686383	0.646572	0.68902	0.721363	0.641318	0.69877	0.660464	0.689872	0.648146	0.657304
0.453536	0.416068	0.433159	0.459249	0.449228	0.426956	0.421745	0.624254	0.703337	0.671361	0.665351	0.691125	0.678714	0.676764	0.685273	0.668411	0.607357	0.643639	0.676685	0.610486	0.895002	0.449213	0.847053	0.693223	0.673775	0.732172	0.750557	0.739322	0.79541	0.380365
0.689521	0.622981	0.623925	0.611747	0.62731	0.599838	0.578831	0.601041	0.63585	0.614352	0.599043	0.61965	0.665408	0.627963	0.684968	0.631718	0.262935	0.636375	0.610423	0.709978	0.711817	0.68495	0.746348	0.738317	0.671324	0.670716	0.728605	0.720706	0.721799	0.72007
0.477808	0.447482	0.594206	0.480771	0.504589	0.484075	0.442246	0.48655	0.500201	0.557564	0.48738	0.62106	0.651994	0.679199	NaN	NaN	NaN	NaN	NaN	NaN	NaN	NaN	0.413119	0.397231	0.372023	0.37583	0.63938	0.638779	0.602656	NaN
0.602051	NaN	0.640378	0.651123	0.620083	NaN	0.671186	0.602884	0.594949	NaN	0.472314	0.488169	0.41901	0.402276	0.444833	NaN	NaN	NaN	NaN	NaN	NaN	NaN	NaN	NaN	NaN	NaN	NaN	NaN	NaN	NaN
0.222442	0.208757	0.238502	0.326455	0.345598	0.282311	0.279268	0.69931	0.284221	0.674952	0.254223	0.218503	0.201587	0.206062	0.240203	0.321489	0.229165	0.641532	0.280202	0.65307	0.611756	0.218518	0.151702	0.673391	0.709687	0.208065	0.483538	0.247349	0.127473	0.203564
0.462336	0.261457	0.22104	0.169306	0.0928485	0.334041	0.40928	0.38482	0.410783	0.352314	0.308801	0.33442	0.225785	0.311884	0.250093	0.230746	0.261182	0.278783	0.249941	0.184976	0.177658	0.277441	0.246851	0.3795	0.439904	0.479875	0.333976	0.270503	0.307685	0.279485
0.171626	0.213606	0.134451	NaN	0.160253	0.182716	0.278468	0.236636	0.252977	0.3256	0.361078	0.266534	0.350217	0.243783	NaN	NaN	0.254705	0.268525	NaN	0.0990625	NaN	0.138334	NaN	0.204304	0.114989	0.165649	NaN	0.163257	0.181615	NaN
0.326244	0.267116	0.298744	0.18261	0.344149	0.308149	0.39311	0.381552	0.47585	0.437868	0.421686	0.485567	0.417125	0.363155	0.38477	0.435362	0.473189	NaN	0.302389	0.35637	0.322893	0.300723	0.374157	0.461878	0.409475	NaN	0.426788	0.438278	0.441756	0.366032
0.386555	0.421218	0.390613	0.128586	0.152325	0.261017	0.364575	0.467663	0.52608	0.5322	0.540529	0.591687	0.523065	0.409264	0.327676	0.439646	0.439243	NaN	0.203129	0.317601	0.489679	0.227464	0.287286	0.445593	0.429241	0.375338	0.280791	0.283352	0.369718	0.420312
0.647843	0.64057	0.652103	0.678414	0.556695	0.5912	0.678925	0.702927	0.707371	0.702187	0.699267	0.703258	0.702419	0.667345	0.661354	0.688752	0.709571	0.678321	0.660917	0.685652	0.619495	0.645933	0.682819	0.711139	0.702941	0.663978	0.677876	0.680254	0.672986	0.671814
0.677734	0.655332	0.654764	0.67173	0.644507	0.631829	0.694856	0.724352	0.718202	0.702839	0.653102	0.701265	0.719167	0.703025	0.676961	0.651982	0.684609	0.707588	0.682005	0.698029	0.61873	0.627078	0.677773	0.704037	0.700829	0.658828	0.691466	0.719987	0.677806	0.684013
0.667701	0.689288	0.727923	0.640646	0.71145	0.73991	0.721581	0.805304	0.83318	0.812353	0.793436	0.692595	0.675079	0.776249	0.774069	0.697636	0.627802	0.661474	0.693508	0.735062	0.713272	0.757268	0.745348	0.69374	0.675846	0.728574	0.777107	0.692391	0.794257	0.784622
0.670421	0.70138	0.727088	0.642618	0.714008	0.757846	0.70738	0.795938	0.829227	0.815718	0.77975	0.697464	0.681669	0.771135	0.758647	0.691056	0.640121	0.678428	0.720362	0.737586	0.712013	0.759869	0.745908	0.691501	0.67432	0.735208	0.780129	0.69328	0.767124	0.774241
0.580261	0.557418	0.559417	0.592936	0.616442	0.631968	0.671056	0.646191	0.628283	0.605358	0.587234	0.623968	0.63717	0.613583	0.59134	0.59489	0.601822	0.609623	0.600567	0.611973	0.616913	0.624598	0.626083	0.624498	0.621488	0.621662	0.616104	0.614896	0.61706	0.595552
0.634105	0.580018	0.596312	0.629731	0.666236	0.71079	0.714059	0.722552	0.727692	0.738445	0.675126	0.694089	0.701312	0.693153	0.66113	0.670723	0.730612	0.75174	0.708511	0.68603	0.691305	0.618932	0.70588	0.717166	0.729969	0.714177	0.732998	0.701312	0.717898	0.670795
0.770005	0.808872	0.76348	0.796122	0.799023	0.794129	0.805064	0.85098	0.854644	0.84023	0.81199	0.834653	0.860124	0.802054	0.807177	0.824596	0.809178	0.772256	0.825889	0.82846	0.834925	0.847303	0.786464	0.805156	0.825563	0.811118	0.74801	0.77559	0.784243	0.811624
0.777127	0.652065	0.578942	0.581078	0.465722	0.606089	0.520454	0.591819	0.522851	0.566049	0.554816	0.61453	0.583007	0.616548	0.410797	0.466116	0.44021	0.46784	0.445422	0.360334	0.434679	0.498947	0.47387	0.541097	0.660448	0.516456	0.556802	0.522496	0.465532	0.423084
0.679123	0.746707	0.738884	0.741765	0.68397	0.632811	0.687897	0.814535	0.781114	0.805474	0.776766	0.719046	0.774799	0.757088	0.729424	0.726299	0.569719	0.684272	0.691596	0.655108	0.644936	0.620858	0.638477	0.655187	0.707177	0.710339	0.691928	0.7102	0.669037	0.650005
0.760679	0.743476	0.73633	0.744678	0.721365	0.666403	0.601479	0.756542	0.786874	0.819172	0.788966	0.804661	0.772013	0.73951	0.758984	0.810085	0.792355	0.769006	0.808429	0.816362	0.813487	0.816376	0.764032	0.779884	0.788745	0.70781	0.710134	0.803423	0.809142	0.779448
0.805371	0.834769	0.836267	0.832349	0.817323	0.542803	0.721078	0.82467	0.844867	0.860767	0.825473	0.814603	0.783604	0.792757	0.839348	0.813726	0.756615	0.785005	0.821013	0.817841	0.810433	0.813198	0.803161	0.807184	0.766439	0.751854	0.776309	0.80146	0.810392	0.803414
0.408796	0.234252	0.371972	0.140103	0.145996	0.263273	0.270396	0.392617	0.311333	0.26641	0.498309	0.437634	0.229537	0.25067	0.232128	0.246372	0.136524	0.297427	0.226955	0.304666	0.273172	0.197705	NaN	0.250758	0.222985	NaN	0.18162	0.166474	NaN	NaN
0.363655	0.590043	0.561409	0.275295	0.183251	0.302459	0.548674	0.595899	0.647478	0.420016	0.484893	0.635906	0.626709	0.659637	0.623044	0.601093	0.475911	0.581489	0.421462	0.362951	0.556205	0.56167	0.421708	0.443365	0.481461	0.301184	0.413265	0.423629	0.519826	0.565542
0.527973	0.496823	0.597196	0.515435	0.265236	0.288409	0.443221	0.534749	0.635978	0.614035	0.56259	0.567807	0.578537	0.580086	0.406282	0.466956	0.472356	0.402227	0.340973	0.441528	0.499256	0.36718	0.328147	0.517925	0.443447	0.39539	0.443505	0.414746	0.322251	0.338201
0.67728	0.606659	0.587993	0.538547	0.458748	0.501906	0.417712	0.505628	0.614588	0.658613	0.697214	0.673277	0.64728	0.652441	0.680704	0.624417	0.555308	0.577076	0.660694	0.619306	0.568388	0.563398	0.614848	0.61533	0.619519	0.543615	0.625174	0.649581	0.523742	0.54281
NaN	0.178947	0.270834	0.103744	0.321974	NaN	NaN	NaN	NaN	0.251837	0.31137	0.276376	0.300859	0.315131	NaN	0.318046	0.233257	0.300165	0.366922	NaN	0.22507	NaN	0.365229	0.328082	0.318694	0.258705	NaN	0.326295	NaN	0.298557
0.49748	0.544037	0.518297	0.463543	0.132272	NaN	0.342051	0.433178	0.474238	0.562035	0.53714	0.518873	0.541065	0.589762	0.476365	0.391874	0.461612	0.527697	0.385567	0.512091	0.575465	0.510358	NaN	0.473078	0.483892	0.444227	0.232991	0.243977	NaN	NaN
0.676791	0.675564	0.679884	0.655744	0.541431	0.65501	0.68836	0.649538	0.650815	0.676099	0.685248	0.697508	0.700505	0.688892	0.700833	0.683541	0.693008	0.682925	0.693427	0.688712	0.689934	0.697254	0.690901	0.659488	0.654036	0.669152	0.598199	0.622745	0.683797	0.643663
0.688841	0.664633	0.674645	0.648664	0.622906	0.642375	0.584911	0.686889	0.66058	0.636326	0.644506	0.671881	0.647514	0.662925	0.679785	0.67259	0.65072	0.683636	0.667031	0.663659	0.709244	0.714896	0.680956	0.637189	0.703634	0.714539	0.62204	0.700491	0.735397	0.740291
0.720375	0.704272	0.710783	0.70685	0.672664	0.51027	0.563686	0.666927	0.711935	0.713071	0.711703	0.72114	0.704874	0.707963	0.710037	0.64708	0.650548	0.694677	0.714251	0.700023	0.699419	0.694583	0.654691	0.655169	0.681972	0.687978	0.69421	0.641289	0.665714	0.694564
0.749392	0.756326	0.775063	0.737806	0.737353	0.559977	0.466366	0.729425	0.785249	0.785282	0.732859	0.742253	0.710085	0.706332	0.623682	0.659956	0.645519	0.582117	0.700948	0.603719	0.65032	0.713381	0.610916	0.693931	0.679532	0.686477	0.717377	0.698507	0.733753	0.758865
0.73384	0.643585	0.668816	0.688284	0.615517	0.709342	0.593292	0.698176	0.739643	0.724588	0.666977	0.722968	0.722142	0.657309	0.705356	0.665718	0.666583	0.709763	0.668468	0.66897	0.684865	0.66453	0.675529	0.628557	0.666592	0.640388	0.659288	0.670373	0.679648	0.71778
0.691934	0.702266	0.701435	0.695594	0.690792	0.712467	0.678629	0.66006	0.699143	0.715281	0.696399	0.667419	0.669963	0.687624	0.692496	0.68671	0.66716	0.685975	0.66531	0.655377	0.67681	0.692538	0.653319	0.644226	0.65726	0.633845	0.597276	0.64328	0.682176	0.671768
0.767279	0.78415	0.750957	0.749663	0.761638	0.254057	0.692101	0.726019	0.775034	0.767202	0.757035	0.773827	0.750814	0.586279	0.716552	0.694589	0.687033	0.66154	0.708	0.719804	0.733808	0.67454	0.714907	0.732022	0.732647	0.667669	0.700344	0.726326	0.711854	0.73696
0.704496	0.697121	0.692486	0.684374	0.689316	0.697019	0.69086	0.688072	0.661383	0.653456	0.64316	0.659173	0.669586	0.670726	0.678525	0.681182	0.634169	0.643511	0.68756	0.691282	0.695738	0.696381	0.682532	0.59933	0.584306	0.654219	0.674164	0.681344	0.553467	0.608029
0.712733	0.697904	0.704588	0.697608	0.692051	0.705722	0.619231	0.66752	0.699236	0.705132	0.698701	0.717722	0.724838	0.706546	0.664584	0.711025	0.71468	0.705379	0.711603	0.705629	0.706826	0.71607	0.703356	0.698611	0.692773	0.641568	0.653641	0.690493	0.698741	0.694961
0.629355	0.576132	NaN	0.5575	0.567928	0.584923	0.584917	NaN	0.574379	0.580509	0.577697	NaN	0.59642	0.584095	0.598335	0.597732	0.583161	0.618163	0.580715	0.558751	0.580183	0.594112	0.562835	0.584537	0.606506	0.592625	0.585325	0.513019	0.598712	0.517405
0.655105	0.565721	0.560982	0.584964	0.586897	0.567011	0.554444	0.59433	0.617519	0.639144	0.628072	0.636682	0.566357	0.614131	0.623155	0.612607	NaN	0.627902	0.567257	0.581116	0.592835	0.560032	0.594146	0.593052	0.572101	0.543575	0.586613	0.582835	0.576071	0.56023
0.523566	0.551229	0.330262	0.465392	0.342488	0.366323	0.658122	0.70882	NaN	0.662388	0.411233	0.681918	0.377863	0.635047	0.356723	0.386086	0.646663	0.425892	0.443679	0.634412	0.374138	0.363727	0.694665	0.384929	0.454038	0.46279	0.440833	0.383518	0.366314	0.329433
0.474564	0.682395	0.328423	0.516359	0.322896	0.0582006	0.0703117	0.0804713	0.19029	0.28026	0.377724	0.214728	0.123524	0.142318	0.141637	0.221775	0.262833	0.251534	0.239412	0.597813	0.465495	0.486796	0.326356	0.249558	0.239956	0.236526	0.199605	0.151988	0.192852	0.457965
0.452152	0.837966	0.808858	0.721376	0.384067	0.667234	0.676911	0.685542	0.706014	0.585293	0.2462	0.19139	0.194181	0.234717	0.279351	0.209533	0.178499	0.152437	0.193811	0.173776	0.268361	0.46363	0.166956	0.702029	0.707725	0.169337	0.255828	0.236747	0.605419	0.625537
NaN	NaN	NaN	NaN	NaN	NaN	NaN	NaN	NaN	0.624067	0.620227	0.601843	0.593097	0.568832	0.578943	0.601796	0.538009	0.558279	0.56816	0.549418	0.575139	0.555845	0.679122	0.495776	0.513226	0.515728	0.51593	0.504692	0.500843	0.512397
0.615909	0.605451	0.597005	0.663651	0.5973	0.606004	0.63231	0.638133	0.634508	0.609196	0.625191	0.644959	0.636004	0.647077	0.60227	0.627864	0.637146	0.600979	0.630739	0.613754	0.691026	0.603804	0.622765	0.644827	0.661543	0.641964	0.651811	0.659975	0.68777	0.721386
0.646808	0.655473	0.657014	0.682314	0.605227	0.603057	0.661377	0.633959	0.632758	0.627243	0.622536	0.629193	0.627211	0.646692	0.567312	0.514846	0.580764	0.554126	0.622852	0.48489	0.586417	0.63305	0.645926	0.658692	0.664321	0.641462	0.556093	0.689193	0.70238	0.725237
0.682392	0.67268	0.719607	0.712906	0.71145	0.722256	0.722242	0.728456	0.720459	0.73259	0.73939	0.735873	0.738872	0.741216	0.739957	0.734608	0.743608	0.745064	0.740918	0.717858	0.745452	0.750658	0.737471	0.756565	0.748794	0.744077	0.696635	0.699489	0.71893	0.731346
0.641334	0.651855	0.635243	0.650751	0.629188	0.600396	0.637341	0.662864	0.667952	0.655307	0.680793	0.667318	0.667256	0.662815	0.658918	0.671751	0.674873	0.676857	0.688817	0.691492	0.689848	0.680817	0.672437	0.670689	0.678196	0.667768	0.611779	0.618493	0.653695	0.670411
0.652749	0.684569	0.697395	0.691924	0.640697	0.580908	0.678851	0.696855	0.705875	0.696131	0.708435	0.704708	0.702585	0.709717	0.706739	0.71085	0.704343	0.70641	0.700143	0.684865	0.666366	0.643145	0.668151	0.669618	0.60359	0.578158	0.628207	0.626207	0.628391	0.650909
0.317396	0.431534	0.391967	0.38688	0.271463	0.259196	0.26069	0.306358	0.295264	0.228129	0.263646	0.310242	0.378578	0.333997	0.336058	0.228804	0.348053	0.448281	0.459021	0.467963	0.456808	0.36957	0.360981	0.36657	0.315275	NaN	0.227114	0.244837	0.322099	0.375333
0.657197	0.648888	0.653462	0.668077	0.672287	0.641851	0.647952	0.659422	0.679543	0.682899	0.690957	0.686022	0.689529	0.699509	0.691668	0.688998	0.687628	0.692972	0.683707	0.685857	0.701152	0.701557	0.693902	0.654584	0.673417	0.675659	0.666542	0.668894	0.682955	0.68893
0.64733	0.659218	0.669925	0.656796	0.642671	0.67689	0.664053	0.633225	0.659257	0.664192	0.645571	0.652294	0.588883	0.615644	0.653208	0.672783	0.670279	0.684784	0.695025	0.679019	0.679664	0.650322	0.614024	0.619065	0.614884	0.599319	0.604729	0.644541	0.632819	0.649344
0.665018	0.654274	0.661809	0.652176	0.653801	0.661083	0.64037	0.629794	0.661585	0.650111	0.621482	0.634832	0.641956	0.640338	0.641325	0.656948	0.642151	0.634089	0.627718	0.633626	0.643223	0.632725	0.637233	0.635978	0.636557	0.596095	0.535076	0.610858	0.639957	0.645335
0.744882	0.73532	0.784792	0.762425	0.742681	0.730326	0.709294	0.742403	0.745307	0.745123	0.695221	0.727111	0.773572	0.759904	0.788408	0.803957	0.807202	0.795146	0.804122	0.762672	0.743112	0.801986	0.840699	0.79362	0.78816	0.794871	0.821631	0.815171	0.847866	0.82769
0.833149	0.82111	0.751635	0.690834	0.743607	0.764265	0.814338	0.838679	0.826521	0.833344	0.813696	0.806704	0.829188	0.825411	0.82623	0.818603	0.822684	0.81267	0.823955	0.820561	0.813303	0.78659	0.72344	0.756397	0.767474	0.784594	0.702893	0.746428	0.789698	0.802261
0.632103	0.630182	0.62201	0.585699	0.584863	0.607398	0.635445	0.604504	0.638576	0.673346	0.649896	0.62008	0.599977	0.609588	0.638578	0.647794	0.652456	0.635705	0.647665	0.662196	0.62387	0.633355	0.651868	0.618584	0.625619	0.621783	0.615663	0.614551	0.649847	0.670839
0.651324	0.634884	0.619233	0.628518	0.578934	0.553854	0.553238	0.497372	0.594393	0.662588	0.688678	0.647339	0.640627	0.600984	0.720875	0.755544	0.686078	0.706915	0.722227	0.729291	0.714731	0.714964	0.712697	0.744808	0.752854	0.735592	0.716178	0.768178	0.796616	0.818883
0.653203	0.651234	0.665518	0.651631	0.623985	0.633881	0.649305	0.63336	0.602755	0.642815	0.644296	0.660363	0.662686	0.602134	0.620754	0.662015	0.682377	0.684076	0.673515	0.678562	0.694425	0.693059	0.627705	0.649108	0.663712	0.613136	0.660494	0.694518	0.709362	0.715963
0.680734	0.680498	0.669023	0.684445	0.684341	0.680426	0.652887	0.674586	0.68213	0.686831	0.657118	0.677364	0.694853	0.672227	0.683547	0.699932	0.709811	0.702223	0.676677	0.669643	0.684597	0.662098	0.625089	0.65665	0.568626	0.629929	0.672862	0.645399	0.660431	0.683022
0.788123	0.850144	0.853397	0.845745	0.842314	0.792421	0.831138	0.8191	0.826363	0.796026	0.79179	0.838239	0.864383	0.852705	0.857823	0.85339	0.850835	0.85296	0.851057	0.870303	0.858076	0.855662	0.830605	0.838236	0.810774	0.606915	0.692376	0.767333	0.821291	0.850608
0.333367	0.497089	0.577355	0.441328	0.348862	0.511091	0.540701	0.388514	0.396951	0.531097	0.599425	0.541759	0.422672	0.379075	0.455409	0.508482	0.519527	0.497222	0.503873	0.546658	0.556512	0.498741	0.467664	0.509873	0.532942	0.303769	0.411395	0.507855	0.434935	0.522233
0.641592	0.670149	0.674263	0.665261	0.643163	0.325763	0.663655	0.657695	0.559276	0.645901	0.689334	0.645828	0.602584	0.628045	0.670186	0.688908	0.685187	0.68376	0.695483	0.695519	0.694093	0.650366	0.621868	0.634138	0.549669	0.602855	0.649366	0.60945	0.6338	0.690851
0.613563	0.599106	0.613102	0.586653	0.553141	0.56516	0.593755	0.593228	NaN	0.546005	0.603797	0.635023	0.66844	0.662616	0.618135	0.632565	0.621373	0.634509	0.70434	0.684284	0.684634	0.673533	0.643115	0.669913	0.575601	0.621513	0.67318	0.6504	0.677924	0.705384
NaN	NaN	NaN	0.262086	NaN	NaN	0.357997	NaN	0.3563	NaN	NaN	NaN	NaN	NaN	NaN	NaN	NaN	NaN	0.326976	NaN	0.374003	0.251525	0.390891	0.190406	0.286766	0.171316	0.140838	0.199333	NaN	0.325669
0.409313	NaN	NaN	0.341614	0.352544	NaN	NaN	NaN	NaN	0.127209	NaN	NaN	NaN	0.558042	0.322865	0.770357	0.741583	0.165527	NaN	NaN	NaN	NaN	NaN	NaN	NaN	0.134322	0.1566	0.204135	0.307178	0.335727
NaN	0.402141	0.114117	0.167319	0.226033	0.337469	0.360931	0.262946	0.176638	0.358633	0.365434	0.136339	0.327901	0.419661	0.407713	0.230624	0.318929	0.48993	0.458655	0.319988	0.261204	0.152933	0.161813	0.267018	0.255718	0.10561	0.127812	0.187282	0.24024	0.291638
0.727498	0.631273	0.570195	0.651361	0.683499	0.671189	0.590079	0.56336	0.635078	0.669973	0.486949	0.628298	0.661594	0.663097	0.637874	0.578914	0.651415	0.683305	0.689447	0.629196	0.585727	0.646469	0.68736	0.569753	0.63661	0.542432	0.6103	0.637025	0.675264	0.697569
0.632484	0.625409	0.601666	0.642484	0.618012	0.560483	0.593471	0.60731	0.624133	0.587026	0.603556	0.626478	0.601096	0.632228	0.628939	0.635034	0.637023	0.616313	0.631049	0.633569	0.621759	0.622022	0.484525	0.471615	0.445992	0.439994	0.450781	0.475142	0.453992	0.530075
0.639853	0.61896	0.624317	0.663222	0.650223	0.575054	0.616199	0.628501	0.63842	0.601307	0.623355	0.64943	0.614438	0.637113	0.668985	0.662669	0.66287	0.641534	0.651242	0.66831	0.652195	0.52481	0.515492	0.516812	0.505126	0.49694	0.527082	0.550323	0.541847	0.552395
0.604317	0.594173	0.579233	0.606462	0.639687	0.61719	0.625822	0.649874	0.630213	0.621159	0.639221	0.635055	0.606358	0.61663	0.624176	0.63242	0.640253	0.636167	0.61837	0.63731	0.629946	0.631186	0.627635	0.628627	0.618243	0.620855	0.641631	0.64847	0.637753	0.644819
0.686329	0.699362	0.692341	0.677529	0.697656	0.712828	0.710848	0.707729	0.706302	0.697624	0.689208	0.710393	0.701585	0.711745	0.721196	0.726056	0.73037	0.718676	0.73829	0.730205	0.730642	0.736156	0.720166	0.711647	0.734453	0.726205	0.68583	0.701176	0.660539	0.725742
0.58596	0.60484	0.61415	0.581169	0.580692	0.491107	0.503695	0.526062	0.524894	0.552324	0.524163	0.552746	0.562323	0.567576	0.579169	0.552681	0.578383	0.598975	0.603699	0.5923	0.586964	0.565808	0.580561	0.566777	0.581805	0.53628	0.555992	0.537593	0.596348	0.586625
0.752733	0.733112	0.743377	0.717589	0.713037	0.651771	0.659481	0.626678	0.671644	0.681186	0.72712	0.698065	0.662161	0.634102	0.68682	0.710735	0.724169	0.731705	0.759746	0.740292	0.600788	0.575042	0.676634	0.515201	0.616182	0.629292	0.520316	0.590862	0.6237	0.733633
0.796906	0.800285	0.778366	0.769914	0.793966	0.688851	0.750307	0.746998	0.754213	0.772466	0.774901	0.762952	0.717052	0.81905	0.848282	0.852069	0.814031	0.838464	0.807151	0.854881	0.865087	0.860485	0.725852	0.773329	0.772865	0.652751	0.719693	0.764286	0.813284	0.81728
0.667967	0.637617	0.577374	0.623426	0.621161	0.530684	0.491243	0.588044	0.630467	0.650243	0.658281	0.683224	0.701424	0.667986	0.677584	0.685244	0.716864	0.705537	0.729149	0.656651	0.638047	0.668658	0.631388	0.633628	0.612946	0.424048	0.589199	0.660854	0.665854	0.698347
0.709049	0.724638	0.704892	0.708086	0.697525	0.677655	0.692006	0.703216	0.713076	0.72199	0.720066	0.730206	0.738803	0.728912	0.734981	0.743744	0.741044	0.739317	0.739324	0.737356	0.753225	0.733922	0.718915	0.687	0.692511	0.684633	0.685741	0.71234	0.733239	0.741987
0.767155	0.764565	0.757699	0.73596	0.726022	0.70626	0.726054	0.744246	0.765449	0.752278	0.75205	0.759413	0.77168	0.75942	0.77109	0.771525	0.770463	0.768461	0.779815	0.784981	0.779804	0.769172	0.742261	0.713548	0.702859	0.676612	0.677451	0.734647	0.749323	0.752406
0.664321	0.663844	0.646417	0.63332	0.642263	0.683532	0.673948	0.704729	0.67404	0.699804	0.698647	0.697848	0.721427	0.695407	0.718961	0.755471	0.754256	0.770786	0.784231	0.767471	0.772707	0.765922	0.745899	0.756183	0.556589	0.741961	0.781275	0.777311	0.803143	0.779446
0.536918	0.719946	0.703839	0.697951	0.701935	0.663633	0.580316	0.618134	0.649496	0.666555	0.685859	0.690269	0.60536	0.669394	0.692703	0.657338	0.694525	0.691729	0.706222	0.65977	0.714514	0.670135	0.690295	0.670307	0.484185	0.522247	0.648154	0.659402	0.707546	0.710899
0.639866	0.431093	0.494359	0.639453	0.649135	0.707718	0.655674	0.469838	0.537552	0.577514	0.552651	0.609875	0.521792	0.462392	0.55148	0.592944	0.582528	0.593277	0.533392	0.601369	0.515651	0.387243	0.538664	0.642838	0.481099	0.529639	0.60551	0.585322	0.663835	0.685412
[truncated: 118 more rows]

## Sheet: ERK_Nuc
7693.1	8808.32	8127.07	6903.36	8644.5	8236.98	3776.07	4591.47	6038.13	8301.46	6336.38	8084.09	9627.75	10414	10541.3	10409.4	10137.7	9823.91	4316.06	4703.15	5507.34	5537.43	6861.58	6069.26	7103.06	8212.97	8861.72	8976.67	8692.53	8343.26
[truncated: 671 more rows]

[truncated: 1 more sheets: ERK_Cyt]
