# Supplementary material for: Live-cell imaging in human colonic monolayers reveals ERK waves limit the stem cell compartment to maintain epithelial homeostasis
Source: eLife. 2022 Sep 12;11:e78837. doi: 10.7554/eLife.78837 (PMC9499537; doi:10.7554/eLife.78837)
Supplement: Figure 3—source data 2. [file elife-78837-fig3-data2.xls]

## Sheet: Figure 3H
Node	Non-node
0	3.90117
12.987	10.4031
17.316	11.7035
21.645	11.7035
21.645	11.7035
25.974	14.3043
21.645	14.3043
8.65801	14.3043
12.987	15.6047
12.987	14.3043
12.987	15.6047
12.987	15.6047
8.65801	14.3043
8.65801	14.3043
8.65801	15.6047
4.329	14.3043
0	13.0039
0	13.0039
4.329	14.3043
8.65801	14.3043
8.65801	14.3043
8.65801	14.3043
4.329	13.0039
4.329	13.0039
4.329	14.3043
4.329	11.7035
4.329	11.7035
0	13.0039
4.329	15.6047
4.329	15.6047
4.329	15.6047
12.987	16.9051
12.987	16.9051
4.329	16.9051
4.329	16.9051
4.329	18.2055
12.987	18.2055
12.987	18.2055
8.65801	18.2055
8.65801	18.2055
8.65801	15.6047
12.987	15.6047
12.987	15.6047
17.316	19.5058
17.316	19.5058
17.316	20.8062
17.316	16.9051
21.645	18.2055
17.316	18.2055
12.987	19.5058
17.316	19.5058
21.645	20.8062
25.974	20.8062
17.316	20.8062
8.65801	20.8062
8.65801	19.5058
12.987	20.8062
8.65801	19.5058
8.65801	18.2055
8.65801	18.2055
8.65801	18.2055
8.65801	19.5058
8.65801	18.2055
4.329	18.2055
8.65801	18.2055
8.65801	19.5058
8.65801	18.2055
8.65801	16.9051
8.65801	15.6047
8.65801	16.9051
4.329	18.2055
0	15.6047
0	15.6047
0	14.3043
0	14.3043
0	14.3043
0	14.3043
0	14.3043
0	14.3043
0	14.3043
0	14.3043
0	14.3043
4.329	15.6047
0	15.6047
0	14.3043
0	14.3043
0	14.3043
4.329	14.3043
8.65801	15.6047
8.65801	14.3043
4.329	15.6047
8.65801	15.6047
0	16.9051
0	18.2055
0	18.2055
0	18.2055
