# Supplementary material for: Live-cell imaging in human colonic monolayers reveals ERK waves limit the stem cell compartment to maintain epithelial homeostasis
Source: eLife. 2022 Sep 12;11:e78837. doi: 10.7554/eLife.78837 (PMC9499537; doi:10.7554/eLife.78837)
Supplement: Figure 4—source data 1. [file elife-78837-fig4-data1.xls]

## Sheet: Figure 4C
DMSO	100nM PMA
0.854872	1.01927
0.885098	0.98667
0.878101	0.938735
0.631841	0.928537
1.07857	0.868183
0.88414	0.964986
0.934069	0.929772
1.19918	0.993416
0.877139	1.20763
0.876134	0.784937
0.923513	1.00931
0.903826	0.610784
0.56175	1.04006
0.775847	1.23344
1.01238	0.784037
0.781451	1.24252
0.596266	0.927139
0.820325	0.895761
0.893977	0.750301
1.45179	1.09121
0.633204	0.986137
1.03097	0.776431
0.837047	0.989064
0.867217	1.14277
0.529905	0.642465
1.25629	0.839674
1.04923	0.881839
0.507901	1.31289
0.66194	0.85673
1.08858	1.06733
1.0293	0.640655
0.869256	1.4628
1.34216	1.27734
0.770792	1.26416
0.650231	0.624483
0.789185	1.43069
1.15951	0.859292
0.561223	0.893862
0.721168	0.952954
1.22377	0.681057
0.69363	1.11314
0.676451	1.58493
0.717609	1.23726
0.618173	0.948587
0.916408	0.731391
0.881054	1.00444
0.764805	0.959914
0.820448	0.706244
0.380819	1.0107
1.78243	0.954606
1.42993	1.29919
0.674242	1.47087
0.807188	1.01633
0.742333	1.07202
0.926182	0.983687
0.422724	0.896301
0.685589	1.11174
1.14762	1.79858
0.621641	1.37468
1.42583	0.959193
1.28506	1.121
0.789381	1.23813
1.31235	1.05115
0.585107	0.678175
0.670014	1.59622
1.62074	1.01356
0.477251	1.01256
1.4742	0.99981
0.995981	0.672416
0.697467	0.879595
1.03009	1.11626
1.54449	1.57218
1.2375	0.821569
0.885798	0.976823
1.09762	1.00335
0.959854	0.819022
1.00432	1.15193
0.564875	0.551056
0.849867	0.941666
0.750238	0.823838
1.48918	0.750647
0.963883	1.07827
0.936678	1.07625
1.19439	1.12638
1.10519	0.883669
0.646607	1.17437
0.785217	1.52058
1.10236	1.43171
1.10318	0.943282
0.72214	0.943792
0.563346	1.55939
0.678826	1.0446
1.00884	1.29665
0.794617	1.00025
0.802426	1.25104
1.01097	0.841537
1.07239	0.645084
0.942979	0.89888
0.722314	0.533084
1.02184	1.06656
0.944283	1.00341
0.747199	0.946266
1.0502	1.01539
0.890066	0.846367
1.05859	0.767588
0.679824	1.10232
1.02722	1.1433
0.730373	0.806812
0.804401	1.43301
0.967865	1.04129
0.843069	1.58187
0.922573	1.1041
1.06254	1.05884
1.21237	0.882036
0.86745	1.13686
0.81374	1.03116
0.813809	1.26663
0.992132	1.0597
0.651041	0.939104
0.817447	1.24196
0.660243	0.959391
0.972107	0.831436
0.749437	1.12179
1.08096	1.12004
0.679019	0.978791
1.02668	0.978821
0.805359	1.13232
0.728519	1.15002
0.642332	1.86445
0.904758	1.23784
1.2847	1.01533
0.842829	1.42304
1.24347	1.02567
1.34414	1.14122
0.675437	1.10772
0.886342	1.12103
0.735988	1.11505
0.495828	1.03877
0.443271	1.35813
1.75995	1.08638
0.78839	1.07713
1.23888	1.04247
1.15604	1.15893
0.662838	1.06565
0.737222	1.0436
1.17257	1.09407
1.36582	0.946225
1.09323	0.982179
0.925162	1.02191
0.702179	0.912983
0.784871	1.1375
0.70009	1.15982
0.680769	1.11012
0.947251	0.791193
0.797948	0.968572
1.16432	1.0531
1.14473	0.963991
1.02547	1.00144
1.31917	1.10722
0.908138	0.966299
0.590591	1.04816
0.975624	0.500227
0.914402	0.591191
0.821028	0.980472
0.824238	1.03279
0.686802	1.24473
0.754414	1.14677
0.679826	0.943191
1.06987	1.04951
0.762193	1.14132
1.00483	1.00344
1.09445	0.890693
0.962354	1.29152
1.23813	1.09503
1.02646	1.12301
0.967277	0.976729
0.90942	1.02771
0.916663	0.972722
0.674977	0.905734
0.851286	0.601787
0.812504	1.11779
1.15732	0.695821
1.58997	0.979533
0.753832	1.175
0.860918	1.16837
0.980109	1.02608
0.635477	0.728955
0.99471	0.867219
0.85986	0.940016
0.621104	0.919619
1.00202	0.940512
0.886762	1.01202
1.06707	0.949539
0.52118	1.45271
0.941487	1.18305
1.03852	0.747908
0.986693	1.10455
1.39942	1.89159
0.872267	1.03253
0.719431	1.1213
0.868197	0.784822
0.751967	0.854693
0.840066	1.02539
0.764051	0.677581
1.06431	1.06399
0.795552	1.21223
0.929114	1.11748
1.19695	1.05102
0.734512	0.937861
0.744935	0.772704
0.81046	0.969693
0.998653	0.914093
1.02122	1.33219
0.891124	1.90117
1.02369	1.25924
1.24971	1.24249
0.777574	1.04181
0.780057	0.817523
0.839184	1.53215
1.03418	1.00063
0.654372	0.988728
1.10202	1.29388
0.995412	1.05361
0.685511	0.988375
0.764151	1.09763
1.17514	1.31838
1.09927	1.32524
0.904785	1.02265
0.659247	1.1399
0.96753	0.961712
1.00416	0.979372
0.880244	1.10258
0.881491	0.934903
0.81555	1.30475
0.924499	1.05767
0.715036	0.913073
0.937189	0.915289
0.858041	1.05895
0.864266	0.923746
1.03327	1.12747
0.912465	1.30368
0.850805	1.21367
0.77684	1.01289
1.04255	1.0814
1.16867	1.09339
0.932645	0.894232
0.752827	0.966613
0.924687	1.12481
0.985981	1.27688
0.715855	1.19321
0.726211	1.20642
0.833243	1.11667
1.18585	1.03913
0.705393	1.08698
	1.02973
	0.927228
	1.22466
	1.25488
	1.15499
	1.25602
	1.17456
	1.36372
	1.09401
	1.00888
	1.00293
