# Supplementary material for: Live-cell imaging in human colonic monolayers reveals ERK waves limit the stem cell compartment to maintain epithelial homeostasis
Source: eLife. 2022 Sep 12;11:e78837. doi: 10.7554/eLife.78837 (PMC9499537; doi:10.7554/eLife.78837)
Supplement: Figure 4—source data 3. [file elife-78837-fig4-data3.xls]

## Sheet: Figure 4F
DMSO	100 nM PMA
5	1
4	0
4	1
3	0
5	0
4	0
3	0
5	0
2	0
2	0
2	0
4	1
3	0
2	0
1	0
4	1
4	1
1	2
1	1
3	1
2	1
2	0
2	1
4	0
4	0
3	0
4	0
4	0
6	1
7	0
2	1
5	2
2	1
3	0
2	0
4	0
4	0
1	0
3	0
2	0
2	0
3	0
1	1
2	1
4	2
4	0
1	1
3	0
3	0
2	1
3	1
	1
	0
	1
	0
	0
	0
	1
	1
