# Supplementary material for: Live-cell imaging in human colonic monolayers reveals ERK waves limit the stem cell compartment to maintain epithelial homeostasis
Source: eLife. 2022 Sep 12;11:e78837. doi: 10.7554/eLife.78837 (PMC9499537; doi:10.7554/eLife.78837)
Supplement: Figure 5—source data 1. [file elife-78837-fig5-data1.xls]

## Sheet: Figure 5B
t
0.333	144.405	148.489	149.335	151.219	154.72	143.043	147.413	157.335	160.062	157.134	154.398	162.154	159.556	151.41	148.081	155.721	165.276	157.863	161.682	160.124	155.884	159.215	146.321	159.467	159.159	160.61	143.409	160.007	163.423	153.162	166.345	160.84	158.15	163.957	161.376	144.474	161.732	164.869	162.297	166.389	158.703	152.059	161.099	162.966	157.569	158.534	159.865	167.135	160.028
0.666	142.345	146.413	147.47	150.011	154.318	145.664	155.801	146.052	159.348	151.719	156.811	155.518	148.484	160.051	155.694	147.097	156.671	162.014	159.885	155.475	157.201	157.955	159.041	144.473	158.804	156.032	161.126	152.051	156.979	164.792	160.339	157.056	158.724	143.392	166.51	160.657	160.039	157.384	157.864	157.519	162.104	151.261	158.432	162.205	156.344	158.234	158.292	158.912	158.798
0.999	141.992	145.715	146.804	149.085	152.669	155.031	144.691	145.596	158.691	151.093	155.946	154.584	159.634	148.123	154.857	146.536	155.401	158.919	159.86	154.761	155.076	156.777	158.457	144.187	157.542	160.394	153.192	151.643	165.162	154.985	153.52	160.715	158.805	165.467	143.048	158.976	153.584	157.844	152.254	157.432	160.95	153.01	151.1	159.319	155.158	153.223	156.886	157.622	157.887
1.332	144.923	145.735	147.599	152.295	155.122	141.557	143.459	144.392	158.279	153.218	150.033	157.249	159.54	146.878	152.999	154.914	154.886	145.563	158.653	159.442	155.783	153.727	156.907	157.865	156.9	143.249	159.781	151.678	150.258	164.742	156.067	159.395	151.595	158.698	164.5	157.838	157.693	153.377	151.161	142.234	156.709	160.332	149.88	157.949	150.933	158.942	154.805	150.106	158.092
1.665	144.945	144.526	148.382	152.806	156.439	144.353	141.677	158.876	155.181	144.031	150.164	157.913	160.397	147.902	155.332	155.655	158.969	146.541	162.855	156.113	153.4	157.399	159.202	157.334	159.885	152.107	151.622	144.595	166.172	159.971	159.092	151.165	158.41	164.554	156.81	150.19	156.295	152.872	143.615	149.689	161.08	149.881	157.369	150.586	154.949	159.039	149.831	158.191	157.256
1.998	145.626	144.82	148.687	153.637	158.6	156.346	160.071	154.749	161.438	145.657	151.71	146.187	161.377	142.78	148.162	155.947	164.146	160.592	157.196	159.629	147.635	153.161	158.836	161.715	161.112	159.664	151.906	153.066	168.024	147.331	159.73	151.061	159.751	159.212	166.019	157.739	149.81	154.161	164.881	150.654	151.849	146.414	158.441	156.12	160.813	152.093	156.317	159.026	160.381
2.331	146.633	145.963	146.439	150.656	154.279	162.796	158.942	161.605	156.289	165.906	154.655	163.455	145.995	147.4	143.954	151.41	163.885	157.409	162.133	158.95	162.056	154.846	149.634	164.42	164.249	166.154	161.605	152.545	163.898	153.936	171.976	166.614	151.354	160.482	161.899	163.833	150.552	170.851	150.379	159.578	154.605	171.37	153.809	153.726	162.147	148.203	154.647	162.867	157.923
2.664	146.703	148.585	152.523	155.482	158.713	149.376	167.968	159.301	162.168	162.133	164.141	171.979	158.455	147.148	163.805	150.78	154.471	144.685	159.907	163.017	160.007	170.073	163.602	155.699	152.413	166.607	172.873	163.981	152.529	168.623	156.847	179.487	175.056	151.123	165.013	166.414	165.893	154.083	174.144	152.09	156.193	164.239	155.447	177.22	155.857	167.42	162.205	158.902	159.012
2.997	151.515	157.408	162.418	154.956	149.077	154.338	176.21	165.797	166.424	163.164	167.433	181.942	162.462	176.009	149.869	158.273	154.533	166.51	163.417	165.151	146.734	182.317	168.337	157.081	166.886	182.016	173.142	158.364	153.513	175.007	188.56	155.183	190.466	161.689	170.659	172.635	171.339	155.737	159.74	181.13	153.608	169.701	159.442	185.942	164.77	160.996	168.014	177.857	169.013
3.33	149.39	150.728	160.374	164.795	180.459	156.065	148.44	187.53	169.902	154.804	165.96	171.721	197.466	170.694	180.281	149.948	168.503	161.467	156.49	168.712	158.082	196.099	179.408	174.552	196.304	164.289	161.353	186.001	154.524	157.097	185.087	206.832	168.557	196.123	160.41	176.296	179.376	165.222	155.981	194.57	165.099	197.987	166.196	172.033	167.387	178.267	186.148	175.022	173.083
3.663	153.567	157.815	162.805	164.959	183.597	153.42	195.478	160.026	175.812	172.892	178.774	175.066	197.575	209.312	170.493	177.499	153.245	173.329	160.041	162.075	175.303	165.064	184.615	212.577	193.602	171.089	208.054	217.515	157.017	177.804	162.121	170.663	229.256	216.906	188.35	171.287	191.056	157.238	170.48	188.848	210.912	177.072	185.985	215.648	181.224	172.701	193.706	178.391	189.379
3.996	155.87	162.541	171.648	180.869	175.833	171.476	209.371	184.732	194.156	186.967	175.538	185.343	211.015	221.792	159.803	173.55	188.624	183.152	168.746	166.008	192.493	177.701	230.471	213.871	177.265	249.962	233.744	182.917	161.62	167.649	208.335	183.915	181.563	194.28	234.795	178.368	218.724	162.19	229.671	195.561	239.371	187.828	180.276	191.526	187.586	180.524	175.435	199.253	201.641
4.329	169.251	174.851	189.89	184.52	177.201	224.902	197.505	202.157	192.117	195.486	224.596	191.11	221.585	176.435	166.85	236.534	171.068	180.135	244.506	198.475	193.241	202.348	169.389	179.338	169.09	244.236	230.053	188.008	192.54	277.05	251.369	255.863	163.5	171.003	182.427	214.23	190.274	252.361	207.15	187.717	237.872	172.612	239.799	166.038	204.72	270.808	194.278	208.708	195.213
4.662	171.295	181.13	193.862	188.508	182.558	240.974	197.476	216.53	200.113	242.065	193.659	195.534	236.624	166.715	173.372	259.523	248.491	175.041	184.181	215.485	203.847	212.745	175.557	175.202	256.166	244.741	181.254	202.356	199.989	305.778	274.523	282.338	165.107	186.767	174.602	225.577	227.123	195.737	216.122	256.501	247.846	174.661	216.188	299.524	171.801	179.983	197.417	201.078	228.053
4.995	191.049	176.774	181.229	193.979	191.21	252.342	202.442	223.423	247.713	212.313	195.104	167.894	198.103	251.899	175.797	283.102	228.757	180.238	260.147	190.845	212.174	184.439	220.09	179.408	271.808	225.891	193.559	205.653	320.235	292.408	311.028	165.039	237.314	187.363	249.941	180.836	201.828	222.584	285.208	227.692	259.371	182.757	326.37	174.429	208.433	246.203	199.691	212.166	218.724
5.328	170.755	199.809	184.086	182.221	192.522	210.759	253.331	210.834	257.375	228.902	198.88	170.836	264.839	202.485	179.648	308.777	241.14	187.154	189.702	274.023	224.091	196.888	224.067	289.687	240.431	180.704	206.729	320.785	212.851	299.257	334.222	165.31	195.234	243.2	269.372	188.517	209.054	185.175	231.464	393.721	268.844	189.309	232.567	251.701	175.89	216.554	258.09	215.472	212.476
5.661	199.383	188.026	183.124	190.957	197.652	248.829	221.145	226.206	265.173	236.064	192.262	170.903	178.807	280.495	205.057	335.464	190.78	256.248	185.517	280.054	236.262	201.535	233.982	264.953	317.512	243.202	183.632	328.784	213.422	218.33	304.788	351.68	168.188	199.095	181.255	281.021	251.823	214.197	192.877	233.436	422.835	196.606	288.783	176.487	270.2	267.182	219.184	222.432	242.868
5.994	203.934	192.678	185.753	194.559	199.24	237.114	254.678	233.072	267.272	172.816	191.598	254.961	190.874	179.919	278.8	211.754	183.159	278.665	296.358	343.537	265.597	198.997	240.795	198.764	341.68	220.164	329.181	219.639	368.19	171.424	197.676	286.672	256.61	197.231	238.321	218.311	444.712	188.829	194.2	284.257	181.923	285.032	274.37	238.799	225.624	381.865	231.319	228.263	269.999
6.327	198.691	189.722	185.356	188.797	198.646	247.57	262.911	237.653	186.09	169.975	266.398	201.449	255.998	174.731	288.431	189.714	295.412	320.375	209.156	354.955	286.685	190.427	269.927	200.499	249.256	355.72	215.399	360.49	387.125	169.927	219.89	194.876	293.233	197.399	266.306	238.97	468.533	207.247	220.742	293.417	180.043	306.539	185.143	286.249	243.305	406.099	226.475	228.838	270.482
6.66	199.576	188.777	189.419	189.035	199.051	275.743	248.183	188.354	238.247	167.674	214.269	267.71	172.983	292.723	198.033	329.782	353.194	250.162	311.489	213.816	310.155	191.92	192.765	273.873	229.698	189.993	361.693	370.303	373.97	251.689	168.653	400.339	299.224	202.631	224.301	198.792	212.38	262.766	486.24	237.591	316.095	302.232	181.68	230.044	289.589	224.664	184.179	256.25	424.847
6.993	205.195	185.963	190.846	191.599	201.646	288.763	190.445	171.251	233.444	209.093	201.328	285.348	186.692	335.132	305.883	320.021	267.66	222.013	327.203	199.658	365.717	208.262	192.566	274.805	240.885	196.654	394.846	405.979	309.313	254.934	275.455	221.463	175.611	425.809	199.34	230.399	353.943	500.837	263.689	237.507	329.817	323.524	186.761	242.243	287.638	224.527	238.422	446.304	196.883
7.326	198.146	188.776	207.754	194.357	197.927	295.622	199.987	230.927	196.361	230.05	180.28	301.202	331.206	320.659	315.739	273.924	351.46	228.411	323.264	202.911	196.329	363.483	287.813	230.019	203.17	441.144	417.963	321.52	310.142	269.306	166.092	440.256	203.133	226.529	239.281	499.04	205.865	356.996	253.341	350.358	194.153	277.352	298.626	471.39	224.559	255.112	248.174	195.377	252.718
7.659	205.617	204.997	200.587	194.071	212.031	292.932	204.917	240.993	204.479	264.722	187.217	295.749	320.668	323.833	318.559	293.171	387.542	243.274	334.354	192.046	206.976	280.688	215.121	219.8	371.975	445.807	446.528	329.134	285.223	176.38	283.585	444.887	464.023	207.543	237.448	247.691	516.945	197.044	364.301	355.207	259.77	299.924	288.398	496.342	242.902	263.929	227.409	387.973	267.845
7.992	210.397	230.906	205.723	208.583	194.762	310.851	198.53	207.614	188.436	247.588	303.552	336.759	340.082	312.871	305.927	399.122	253.911	188.216	333.082	220.942	273.415	217.658	391.988	460.883	496.848	182.3	239.387	339.225	300.629	487.799	379.093	211.614	475.219	265.447	546.236	242.776	367.984	211.74	352.686	264.422	295.41	264.078	298.398	519.864	236.25	403.171	245.373	278.972	365.995
8.325	213.935	243.408	216.237	220.521	195.7	322.676	202.032	208.314	193.098	266.895	307.851	362.202	371.761	304.355	317.357	257.85	381.659	199.09	383.976	233.14	269.078	233.066	400.049	482.924	526.882	356.366	297.83	227.515	217.54	486.215	282.995	469.637	400.331	556.483	254.197	210.434	386.822	406.858	305.05	268.011	286.517	531.447	223.863	241.086	297.818	287.351	423.942	278.954	362.844
8.658	218.628	250.261	218.108	215.406	199.629	205.417	333.843	207.474	199.245	266.216	315.802	368.885	388.241	317.313	317.648	213.052	259.289	392.849	209.271	262.318	278.667	236.82	431.011	524.046	559.497	206.679	306.819	363.798	231.787	519.54	277.681	223.773	477.037	413.189	244.848	547.602	430.946	218.024	426.874	285.736	328.067	283.459	273.647	221.502	314.701	252.821	490.111	292.733	290.177
8.991	226.369	207.472	251.596	221.884	212.081	206.011	359.511	217.106	206.624	282.589	294.649	371.592	210.842	293.168	331.45	396.352	433.68	266.151	221.492	427.439	396.613	315.94	322.92	287.325	228.794	533.905	542.05	306.679	352.453	237.632	222.092	540.054	282.732	222.981	466.632	375.343	243.455	552.721	215.952	451.535	450.393	338.521	281.585	216.451	292.3	319.641	249.85	221.271	288.561
9.324	228.608	254.999	223.523	213.38	222.269	197.417	225.951	336.02	206.539	295.671	214.772	306.968	383.629	301.788	441.145	393.584	283.811	352.589	224.64	434.231	380.14	296.227	219.761	303.238	553.046	348.892	554.405	306.146	456.03	549.771	242.305	261.255	290.928	219.726	389.425	245.84	463.591	559.395	473.113	337.787	309.761	281.7	213.558	237.88	322.828	239.633	279.756	436.802	401.77
9.657	264.765	227.852	218.533	228.657	202.224	230.87	330.549	203.413	294.553	212.944	375.256	324.197	329.221	368.699	378.74	293.696	415.207	209.331	458.241	475.274	363.098	228.845	312.991	569.795	278.869	293.381	367.77	605.695	311.229	569.956	248.469	214.183	232.059	510.257	445.101	308.278	243.928	481.367	594.326	442.208	333.592	291.267	226.652	319.783	307.113	254.275	288.532	315.54	414.059
9.99	228.931	273.756	220.248	201.108	242.751	353.269	236.626	210.959	292.942	225.713	377.674	353.314	386.951	325.077	396.835	465.304	292.401	208.994	274.605	407.067	452.688	234.815	322.628	262.22	571.383	608.622	322.561	190.522	555.777	495.534	251.883	242.446	436.886	249.384	304.076	497.028	605.179	459.073	342.793	299.545	209.915	288.022	320.732	265.895	311.325	283.618	248.556	415.214	413.429
10.323	253.905	232.021	227.007	203.097	292.55	257.735	382.66	237.106	302.961	346.39	226.904	393.227	412.884	234.259	223.816	327.459	414.338	430.264	305.387	212.405	284.763	370.407	270.057	472.086	497.783	241.111	603.44	630.291	327.557	190.813	264.987	533.945	244.908	544.518	431.134	244.104	305.016	246.912	520.375	623.744	354.087	300.632	257.81	196.637	322.59	275.143	425.439	323.18	284.987
10.656	242.595	244.262	211.514	209.184	233.171	414.164	245.513	269.684	313.98	300.968	323.675	441.133	410.473	232.166	327.693	223.576	238.882	419.86	301.828	242.123	288.148	320.392	385.418	530.854	624.709	238.091	329.604	277.299	195.158	565.617	563.968	441.039	255.374	240.817	539.791	308.154	637.785	245.852	365.027	279.856	194.855	304.005	297.169	321.206	436.511	319.178	279.975	278.439	260.846
10.989	260.272	239.02	229.786	214.43	209.957	396.984	216.836	300.56	253.605	298.268	327.897	469.502	302.656	479.579	431.74	225.551	223.257	408.277	303.193	291.59	260.784	372.638	394.741	520.698	655.84	333.324	559.303	228.148	339.212	205.955	288.264	570.903	597.727	246.56	250.856	444.755	563.271	668.382	307.221	304.051	368.601	316.34	204.22	245.578	295.917	325.255	469.538	277.056	324.172
11.322	250.983	256.326	315.813	231.765	218.353	207.981	212.825	423.046	238.945	284.882	245.858	267.942	227.333	349.644	311.652	478.065	418.7	432.138	491.688	213.666	214.53	432.249	290.547	282.434	394.586	305.238	361.525	658.141	543.016	217.177	341.217	281.582	218.544	596.651	602.315	250.062	294.992	576.501	691.876	299.718	320.39	320.683	209.038	364.298	334.384	259.033	299.352	283.567	273.6
11.655	229.64	219.67	254.348	314.943	221.184	216.129	218.123	234.471	419.963	243.429	252.572	239.532	295.326	250.951	342.122	310.488	441.68	213.085	513.886	439.416	505.762	435.527	262.764	272.807	385.028	300.876	334.314	668.145	216.721	566.275	344.07	675.753	278.419	191.927	244.881	655.885	295.4	284.247	559.754	598.541	706.671	301.502	377.22	360.672	311.15	210.654	318.396	343.351	259.29
11.988	255.967	240.12	236.826	297.906	363.628	226.457	234.357	262.074	405.875	299.252	261.757	254.715	335.381	259.245	331.902	432.793	408.828	219.52	221.559	469.349	282.583	445.784	476.71	278.803	372.399	307.731	343.199	694.538	550.355	227.211	336.934	647.022	291.064	193.808	277.24	687.651	248.431	609.229	582.772	320.477	283.651	721.498	409.45	376.113	368.983	331.408	215.132	314.676	274.561
12.321	256.31	257.054	258.117	356.059	245.023	228.097	254.464	434.083	304.467	360.305	247.266	277.566	281.333	330.193	252.712	402.741	469.878	441.35	300.274	455.406	240.128	232.928	293.929	382.429	339.741	363.675	705.873	479.869	236.053	354.802	312.415	812.414	637.492	282.119	201.655	249.162	251.55	623.111	337.124	643.566	751.348	627.233	405.225	397.066	329.054	339.321	369.621	287.394	214.866
12.654	277.495	255.848	270.411	281.563	390.336	239.031	285.596	242.151	317.208	457.326	411.11	307.041	303.126	382.97	426.934	286.192	279.78	428.2	289.878	505.585	295.028	245.494	255.619	371.196	431.612	306.596	725.572	557.915	389.774	278.249	235.347	369.012	309.977	282.062	625.158	265.976	207.92	336.505	273.691	643.928	637.273	666.371	775.124	393.541	318.005	313.046	374.599	395.716	301.59
12.987	300.122	289.035	292.685	406.897	331.02	260.321	237.911	245.817	310.186	472.636	409.712	278.963	385.949	311.915	413.361	269.154	270.811	484.102	446.585	505.089	560.605	290.951	236.145	329.108	248.032	435.36	305.067	262.491	406.698	255.438	799.465	604.669	243.054	546.265	373.141	326.701	293.598	266.617	198.285	679.942	282.773	314.555	691.445	651.615	791.703	410.593	288.661	308.044	375.101
13.32	282.642	279.642	310.946	352.478	256.278	242.299	471.725	237.345	409.071	332.81	279.412	321.896	259.575	480.346	382.173	397.371	512.779	552.139	545.208	240.501	352.272	304.17	286.155	423.632	238.087	259.699	268.454	353.521	258.218	803.3	629.333	512.991	361.185	244.307	269.544	296.838	317.682	187.592	680.62	652.591	281.786	340.338	657.741	404.002	781.079	333.996	334.436	223.95	405.422
13.653	268.266	279.004	307.06	365.554	254.454	235.291	515.407	232.007	343.918	436.835	286.783	304.065	217.271	474.267	525.239	553.825	365.008	267.663	357.647	294.56	246.782	419.264	299.343	264.344	301.1	262.383	831.778	386.689	518.728	631.742	357.382	260.662	246.659	301.339	341.797	191.865	698.87	677.263	339.861	293.085	686.089	434.191	302.447	768.188	304.062	399.123	342.271	226.953	340.035
13.986	274.171	258.876	292.865	377.046	255.762	231.835	471.287	235.624	438.009	219.946	300.377	465.958	274.123	466.359	236.755	542.823	521.434	485.589	352.573	343.661	312.574	443.005	264.366	289.439	268.727	278.052	531.025	838.548	419.131	666.732	299.586	372.38	350.114	195.645	243.751	694.404	689.128	312.07	293.845	731.376	303.963	442.624	412.69	766.153	324.808	350.754	223.012	408.93	292.169
14.319	266.279	249.866	301.576	348.211	244.046	228.664	457.381	438.648	228.426	474.195	544.828	290.029	463.399	297.98	484.95	270.509	440.755	321.977	526.327	341.186	370.979	296.745	264.698	435.722	527.384	305.786	833.168	273.96	698.215	290.703	336.348	231.057	381.326	669.431	303.421	646.961	256.997	292.987	799.375	441.817	315.238	406.319	332.605	757.089	281.525	234.863	426.732	392.53	316.06
14.652	289.445	346.036	260.305	266.973	255.787	226.897	438.453	228.28	433.861	460.98	457.005	527.151	294.071	278.917	445.82	332.783	425.85	352.275	397.766	407.605	309.947	726.394	563.289	827.857	301.327	266.413	307.834	277.27	282.254	403.088	239	702.349	647.845	289.515	261.575	823.972	456.058	317.986	319.519	442.437	306.51	775.224	256.181	444.118	324.814	386.368	316.729	291.561	619.321
14.985	292.974	299.659	308.979	226.829	212.151	480.989	550.23	263.925	209.358	452.452	439.515	320.907	359.611	296.941	249.658	409.008	379.858	848.016	597.255	297.54	253.663	780.053	264.838	278.369	368.291	220.261	275.115	594.213	669.734	929.112	769.987	425.466	267.153	316.561	543.195	421.361	313.217	311.676	260.736	797.354	318.446	449.002	396.511	335.656	610.781	290.927	306.619	331.074	335.341
15.318	261.967	275.095	340.435	296.357	255.956	242.921	241.85	403.12	210.404	543.919	263.493	215.902	508.352	449.303	561.354	435.699	280.418	273.932	292.789	373.903	362.609	388.945	608.112	283.356	258.694	986.149	330.242	764.302	253.125	270.156	230.522	277.203	414.801	604.391	686.681	924.152	824.843	390.855	263.178	311.491	551.083	347.696	479.866	265.418	776.108	454.148	273.633	389.098	577.528
15.651	256.617	253.277	327.595	252.154	239.639	280.354	228.149	348.659	544.771	278.501	241.283	500.255	448.059	281.248	510.23	268.272	334.608	454.354	354.768	366.006	421.734	288.033	272.875	641.015	262.648	756.103	1009.19	326.076	228.732	272.509	401.003	298.147	675.873	261.35	747.042	415.521	913.242	839.785	572.775	310.731	352.905	450.197	258.844	478.634	782.669	253.542	390.041	362.514	612.527
15.984	271.222	278.001	223.251	285.408	240.566	301.498	453.595	237.195	324.829	284.303	258.255	506.077	435.002	587.161	262.707	500.125	334.801	369.094	484.577	334.432	331.382	357.355	448.091	443.215	275.76	619.152	267.449	1044.13	793.633	259.534	366.948	463.696	220.617	275.577	288.341	297.207	728.153	816.643	417.559	883.421	659.352	404.099	310.064	253.408	468.968	823.69	478.286	248.363	333.783
16.317	264.865	291.195	293.293	268.314	215.136	336.514	226.26	350.878	599.476	246.431	379.248	406.952	542.467	269.962	456.756	321.043	495.737	548.756	356.283	350.547	455.448	358.36	277.372	741.865	609.889	254.14	255.952	1077.12	310.371	504.949	287.111	309.217	263.246	676.505	920.266	907.764	466.866	425.822	703.541	288.486	247.49	843.806	245.671	417.297	523.241	495.36	357.177	431.448	633.894
16.65	232.528	295.715	343.502	281.223	282.539	545.53	365.095	237.687	323.06	259.205	475.684	389.777	529.986	285.016	584.188	573.332	327.716	522.092	511.558	389.275	350.45	411.099	444.153	362.63	282.01	745.447	269.157	655.378	276.78	997.024	338.297	525.84	301.186	297.71	291.25	951.138	632.279	1037.09	457.111	815.101	441.165	588.666	302.576	245.583	240.938	847.637	502.468	359.322	502.317
16.983	325.336	368.889	252.333	287.794	406.071	305.022	643.497	242.5	500.673	259.49	285.924	370.039	551.837	551.739	579.905	309.417	570.888	623.908	349.981	338.584	432.918	342.832	448.348	357.254	735.214	631.11	291.144	1071.59	568.294	294.415	247.505	392.82	314.343	330.228	316.354	447.101	656.517	919.558	865.37	660.406	1022.21	514.645	345.626	247.75	277.729	498.213	377.441	786.837	461.826
17.316	316.193	341.072	547.54	404.805	300.797	311.159	266.181	651.454	285.78	720.507	473.037	260.235	281.535	279.408	578.552	525.83	490.357	542.325	397.581	297.773	669.904	378.44	422.795	591.239	371.345	445.892	814.809	319.956	343.804	588.882	315.498	1042.03	645.597	272.138	381.064	701.122	301.42	305.388	900.855	323.218	437.035	884.198	691.126	1066.9	566.77	383.706	516.801	334.233	297.181
17.649	319.429	340.726	522.049	280.423	416.576	289.343	316.383	283.523	688.376	429.169	269.691	576.809	321.133	272.657	533.384	314.321	578.329	466.544	396.354	649.479	361.692	243.809	492.885	349.906	904.132	365.415	653.386	483.961	1024	320.442	337.183	585.845	760.234	316.149	288.29	878.915	304.303	943.9	411.555	445.066	694.687	346.203	1054.28	576.056	385.256	533.095	812.195	485.78	308.045
17.982	347.804	323.366	524.762	390.258	298.922	288.675	477.896	304.041	306.664	671.695	406.862	261.172	617.704	276.603	417.024	592.935	317.67	521.229	589.319	525.895	367.96	371.145	658.758	428.264	361.496	895.15	1051.22	665.823	542.062	480.144	313.097	341.443	482.479	244.231	579.256	780.733	335.106	855.7	991.651	296.495	541.001	294.897	671.434	1019.79	425.57	415.627	387.272	381.815	535.074
[truncated: 36 more columns]
