# Supplementary material for: Live-cell imaging in human colonic monolayers reveals ERK waves limit the stem cell compartment to maintain epithelial homeostasis
Source: eLife. 2022 Sep 12;11:e78837. doi: 10.7554/eLife.78837 (PMC9499537; doi:10.7554/eLife.78837)
Supplement: Figure 5—source data 4. [file elife-78837-fig5-data4.xls]

## Sheet: Figure 5F
NO DOX	+ DOX
0	25
18.2	37.5
28.6	25
9.1	15.38
0	13.33
0	25
20	7.14
0	37.5
25	30
0	33.33
14.3	28.57
0	11.76
20	6.25
12.5	14.29
0	21.74
14.3	11.76
11.1	42.86
0	16.67
0	0
0	0
0	11.11
14.3	22.22
11.1	28.57
25	25
0	23.08
0	25
11.1	9.09
12.5	28.57
0	25
0	40
0	25
0	14.29
0	25
0	33.33
0	0
0	36.36
0	9.09
0	27.27
50	7.14
0	30.77
0	42.86
0	16.67
0	22.22
0	28.57
0	25
0	37.5
20	20
0	25
0	12.5
0	20
0	0
0	0
20	0
0	14.29
0	0
0	0
0	0
0	0
0	0
0	0
0	0
0	0
0	0
0	66.67
0	100
0	0
16.7	50
0	0
