# Supplementary material for: Live-cell imaging in human colonic monolayers reveals ERK waves limit the stem cell compartment to maintain epithelial homeostasis
Source: eLife. 2022 Sep 12;11:e78837. doi: 10.7554/eLife.78837 (PMC9499537; doi:10.7554/eLife.78837)
Supplement: Figure 5—source data 5. [file elife-78837-fig5-data5.xls]

## Sheet: Figure 5H
- Dox	+ Dox
0	1.995
0.665	0
0.665	0.665
0.665	0
1.33	0
0.665	0
0	0
1.33	1.33
0.665	0
0	0
0.665	0
0.665	0
0.665	0
0	0.665
0	0
0	0
0.665	0
1.995	0
0.665	1.33
0.665	0.665
1.33	0.665
0.665	0
2.66	0.665
1.33	0.665
1.995	0.665
1.33	0
1.33	0
0	0.665
0	0
1.995	1.33
2.66	1.995
2.66	1.33
0	0
2.66	1.33
3.325	0.665
0.665	0.665
0	0
0	0
0.665	0
1.33	0.665
1.33	0
1.33	0
1.995	0.665
1.33	0
1.33	0
0.665	0
0.665	0.665
0.665	0
0	0
0	0
0	1.33
0.665	0
0	1.33
1.33	0
0.665	0.665
0.665	1.33
1.33	1.33
0.665	1.995
2.66	1.995
1.995	1.995
0.665	0.665
0.665	0
0	0.665
1.33	0.665
0.665	0.665
1.33	0
	0
	0
	1.33
	0
	0
	0.665
	0
	0.665
	0
	0
	0.665
	0.665
	0.665
	1.995
	0.665
	0.665
	0
	0.665
	0.665
	0.665
	0
	0
	0
	0.665
	0.665
	0.665
	0
	0.665
	0.665
	0.665
	0
	0
	0
