# Supplementary material for: Live-cell imaging in human colonic monolayers reveals ERK waves limit the stem cell compartment to maintain epithelial homeostasis
Source: eLife. 2022 Sep 12;11:e78837. doi: 10.7554/eLife.78837 (PMC9499537; doi:10.7554/eLife.78837)
Supplement: Figure 6—source data 2. [file elife-78837-fig6-data2.xls]

## Sheet: Figure 6D
+Wnt3a	-Wnt3a
9.30267e-05	0.000103
0.000100671	0.000101
9.90236e-05	9.73e-05
9.58433e-05	9.44e-05
9.14947e-05	9.3e-05
8.78295e-05	9.04e-05
8.58915e-05	9e-05
8.39567e-05	8.88e-05
8.19303e-05	8.84e-05
8.03413e-05	8.82e-05
7.99514e-05	8.73e-05
7.97308e-05	8.66e-05
7.80153e-05	8.67e-05
7.78041e-05	8.72e-05
7.75188e-05	8.66e-05
7.64748e-05	8.65e-05
7.60948e-05	8.58e-05
7.60751e-05	8.48e-05
7.6497e-05	8.48e-05
7.65568e-05	8.51e-05
7.68332e-05	8.47e-05
7.73353e-05	8.55e-05
7.73982e-05	8.53e-05
7.7324e-05	8.53e-05
7.72571e-05	8.6e-05
7.74984e-05	8.64e-05
7.74078e-05	8.51e-05
7.67695e-05	8.53e-05
7.67371e-05	8.47e-05
7.70315e-05	8.39e-05
7.71331e-05	8.39e-05
7.69764e-05	8.29e-05
7.79423e-05	8.31e-05
7.65826e-05	8.22e-05
7.68167e-05	8.14e-05
7.63954e-05	8.18e-05
7.57662e-05	8.06e-05
7.56693e-05	7.95e-05
7.63703e-05	7.95e-05
7.57599e-05	7.87e-05
7.5872e-05	7.74e-05
7.59008e-05	7.7e-05
7.50435e-05	7.7e-05
7.47994e-05	7.66e-05
7.48923e-05	7.56e-05
7.46441e-05	7.66e-05
7.345e-05	7.67e-05
7.36269e-05	7.6e-05
7.31909e-05	7.56e-05
7.26887e-05	7.53e-05
7.28651e-05	7.39e-05
7.20383e-05	7.4e-05
7.17257e-05	7.48e-05
7.13272e-05	7.39e-05
7.12677e-05	7.28e-05
7.11162e-05	7.46e-05
7.08908e-05	7.49e-05
7.04498e-05	7.51e-05
7.01996e-05	7.35e-05
7.04032e-05	7.32e-05
7.00766e-05	7.27e-05
6.97749e-05	7.4e-05
6.99966e-05	7.36e-05
6.9415e-05	7.44e-05
6.92022e-05	7.34e-05
6.85885e-05	7.34e-05
6.82818e-05	7.37e-05
6.86139e-05	7.27e-05
6.83055e-05	7.29e-05
6.81784e-05	7.3e-05
6.83307e-05	7.26e-05
6.79814e-05	7.21e-05
6.78689e-05	7.22e-05
6.80106e-05	7.22e-05
6.80605e-05	7.2e-05
6.78569e-05	7.19e-05
6.80457e-05	7.14e-05
6.78868e-05	7.1e-05
6.76407e-05	7.12e-05
6.71659e-05	7.07e-05
6.73596e-05	7.1e-05
6.6708e-05	7.12e-05
6.65739e-05	7.08e-05
6.66014e-05	7.03e-05
6.67708e-05	7.03e-05
6.63262e-05	7e-05
6.64642e-05	7.01e-05
6.65159e-05	6.99e-05
6.67143e-05	7.03e-05
6.6676e-05	7e-05
6.63848e-05	6.99e-05
6.63064e-05	7.01e-05
6.63909e-05	7.02e-05
6.61131e-05	7.02e-05
6.63557e-05	7.03e-05
6.62541e-05	7.02e-05
8.95456e-05	9.16e-05
9.42694e-05	9.34e-05
9.22101e-05	9.16e-05
8.85465e-05	8.83e-05
8.57199e-05	8.76e-05
8.24287e-05	8.69e-05
8.03123e-05	8.58e-05
7.86999e-05	8.66e-05
7.66137e-05	8.7e-05
7.58846e-05	8.63e-05
7.45801e-05	8.56e-05
7.43749e-05	8.6e-05
7.30108e-05	8.57e-05
7.27225e-05	8.57e-05
7.29602e-05	8.59e-05
7.33961e-05	8.57e-05
7.359e-05	8.55e-05
7.3273e-05	8.43e-05
7.27956e-05	8.48e-05
7.24459e-05	8.5e-05
7.26808e-05	8.56e-05
7.41213e-05	8.54e-05
7.39098e-05	8.53e-05
7.39284e-05	8.56e-05
7.41081e-05	8.55e-05
7.4777e-05	8.59e-05
7.49148e-05	8.59e-05
7.51078e-05	8.6e-05
7.54694e-05	8.54e-05
7.50508e-05	8.6e-05
7.50739e-05	8.58e-05
7.50165e-05	8.47e-05
7.51405e-05	8.42e-05
7.40861e-05	8.34e-05
7.41026e-05	8.34e-05
7.46297e-05	8.22e-05
7.37012e-05	8.18e-05
7.32118e-05	8.17e-05
7.30732e-05	8.11e-05
7.24475e-05	8.11e-05
7.24674e-05	8.13e-05
7.22904e-05	8.02e-05
7.24076e-05	7.98e-05
7.15502e-05	7.96e-05
7.09648e-05	7.91e-05
7.11192e-05	7.92e-05
7.0814e-05	7.87e-05
7.01071e-05	7.89e-05
7.00859e-05	7.85e-05
7.00334e-05	7.8e-05
7.01208e-05	7.82e-05
7.02306e-05	7.85e-05
7.01735e-05	7.83e-05
6.96495e-05	7.79e-05
6.96874e-05	7.74e-05
7.00128e-05	7.78e-05
6.89147e-05	7.71e-05
6.90141e-05	7.71e-05
6.86191e-05	7.68e-05
6.83859e-05	7.75e-05
6.77094e-05	7.82e-05
6.84674e-05	7.74e-05
6.7938e-05	7.73e-05
6.73491e-05	7.68e-05
6.71718e-05	7.65e-05
6.6439e-05	7.71e-05
6.62089e-05	7.88e-05
6.64196e-05	7.78e-05
6.59687e-05	7.75e-05
6.58809e-05	7.81e-05
6.60001e-05	7.71e-05
6.60005e-05	7.68e-05
6.58059e-05	7.63e-05
6.5738e-05	7.63e-05
6.55231e-05	7.61e-05
6.56832e-05	7.61e-05
6.50643e-05	7.6e-05
6.48584e-05	7.56e-05
6.47899e-05	7.56e-05
6.47207e-05	7.59e-05
6.44629e-05	7.52e-05
6.44463e-05	7.52e-05
6.44646e-05	7.5e-05
6.39292e-05	7.55e-05
6.37479e-05	7.52e-05
6.33754e-05	7.54e-05
6.3304e-05	7.47e-05
6.31892e-05	7.43e-05
6.31425e-05	7.42e-05
6.28832e-05	7.47e-05
6.27191e-05	7.5e-05
6.24805e-05	7.41e-05
6.27341e-05	7.44e-05
6.27884e-05	7.39e-05
6.24255e-05	7.38e-05
6.25301e-05	7.37e-05
7.92261e-05	9.4e-05
8.56399e-05	9.7e-05
8.48126e-05	9.49e-05
8.18351e-05	9.28e-05
7.90764e-05	9.29e-05
7.72248e-05	9.24e-05
7.52383e-05	9.25e-05
7.37142e-05	9.28e-05
7.24459e-05	9.39e-05
7.1144e-05	9.52e-05
7.05243e-05	9.53e-05
7.0081e-05	9.56e-05
6.98763e-05	9.57e-05
6.87389e-05	9.43e-05
6.83536e-05	9.41e-05
6.77704e-05	9.4e-05
6.79389e-05	9.4e-05
6.75329e-05	9.36e-05
6.72102e-05	9.22e-05
6.83065e-05	9.22e-05
6.90937e-05	9.36e-05
6.92056e-05	9.42e-05
6.87366e-05	9.44e-05
6.92233e-05	9.45e-05
6.92319e-05	9.47e-05
6.97657e-05	9.41e-05
6.91678e-05	9.39e-05
6.90388e-05	9.36e-05
6.88373e-05	9.24e-05
6.91467e-05	9.1e-05
6.93275e-05	9.09e-05
6.94353e-05	9.1e-05
6.91625e-05	8.99e-05
6.89375e-05	8.89e-05
6.88814e-05	8.85e-05
6.85612e-05	8.75e-05
6.87791e-05	8.75e-05
6.93688e-05	8.64e-05
6.87696e-05	8.55e-05
6.8817e-05	8.47e-05
6.84585e-05	8.42e-05
6.79182e-05	8.35e-05
6.79103e-05	8.32e-05
6.79237e-05	8.3e-05
6.82785e-05	8.22e-05
6.76219e-05	8.09e-05
6.73047e-05	8.18e-05
6.74905e-05	8.24e-05
6.73686e-05	7.99e-05
6.75279e-05	7.91e-05
6.69474e-05	7.87e-05
6.71276e-05	7.73e-05
6.65358e-05	7.77e-05
6.60659e-05	7.78e-05
6.68163e-05	7.76e-05
6.5927e-05	7.71e-05
6.57147e-05	7.62e-05
6.51627e-05	7.66e-05
6.50758e-05	7.66e-05
6.48084e-05	7.73e-05
6.42872e-05	7.68e-05
6.43198e-05	7.71e-05
6.42281e-05	7.69e-05
6.35651e-05	7.66e-05
6.38011e-05	7.6e-05
6.33814e-05	7.54e-05
6.30712e-05	7.72e-05
6.32967e-05	7.75e-05
6.26457e-05	7.76e-05
6.2822e-05	7.73e-05
6.25352e-05	7.75e-05
6.18487e-05	7.68e-05
6.15915e-05	7.62e-05
6.13994e-05	7.57e-05
6.13553e-05	7.47e-05
6.13203e-05	7.48e-05
6.2002e-05	7.48e-05
6.20267e-05	7.52e-05
6.1926e-05	7.45e-05
6.21122e-05	7.44e-05
6.16264e-05	7.4e-05
6.15661e-05	7.42e-05
6.14772e-05	7.41e-05
6.11176e-05	7.4e-05
6.11553e-05	7.38e-05
6.12659e-05	7.35e-05
6.12392e-05	7.39e-05
6.13723e-05	7.36e-05
6.15722e-05	7.3e-05
6.11879e-05	7.34e-05
6.12689e-05	7.35e-05
6.21891e-05	7.44e-05
6.22781e-05	7.37e-05
6.19921e-05	7.4e-05
6.16572e-05	7.37e-05
6.16682e-05	7.45e-05
