# Supplementary material for: Live-cell imaging in human colonic monolayers reveals ERK waves limit the stem cell compartment to maintain epithelial homeostasis
Source: eLife. 2022 Sep 12;11:e78837. doi: 10.7554/eLife.78837 (PMC9499537; doi:10.7554/eLife.78837)
Supplement: Figure 6—source data 3. [file elife-78837-fig6-data3.xls]

## Sheet: 6E top
DMSO	15.8nM	50nM	158nM	500nM	1580nM
0.530201	1.50276	3.32325	1.16275	0.457733	0.837466
0.70202	0.912222	1.2501	0.899098	0.148724	0.569653
0.93992	0.806504	1.03315	1.37566	1.9552	0.691164
0.882728	0.8396	0.885874	1.43829	3.87724	0.5498
1.85813	1.45815	1.00828	1.44671	3.64879	0.667641
1.28884	1.18419	1.72883	1.3168	1.13597	0.562788
0.835076	1.52158	0.901177	0.916577	0.4265	0.785313
0.795366	0.903276	1.50199	0.898797	1.19956	3.16331
0.835853	0.611258	0.476037	0.572695	4.48769	2.30185
0.438324	0.33046	0.689679	0.838491	1.66075	1.26414
0.875769	0.290125	0.747058	2.48451	1.87476	2.30695
0.917207	0.602613	1.12188	0.821361	1.22286	1.43861
0.335195	1.32854	2.4399	2.11747	0.730278	2.65976
0.935388	1.20662	0.972381	1.85055	2.22378	1.0538
1.08573	0.589091	0.268132	1.01937	1.99813	1.17386
1.08291	1.19607	0.801633	1.01513	1.13327	1.30262
0.654941	0.499929	0.914011	0.897402	0.421389	0.298791
2.6286	1.75089	0.864687	1.07392	2.02703	1.18664
1.09092	0.944637	3.49434	1.2347	0.538541	1.34368
0.808258	2.53306	0.318359	1.5738	0.742235	3.37461
0.806994	0.556602	1.58067	0.850488	2.43667	0.583374
0.754196	0.783557	0.697456	0.789484	4.83195	0.441998
1.26952	0.75986	0.687659	3.72088	0.921298	0.831202
1.43349	1.61222	2.76597	1.56748	0.589744	1.12749
1.12389	0.964487	2.29518	3.17062	0.452839	0.805846
0.874181	1.83898	2.35448	1.02258	2.59797	1.67097
0.909712	1.14732	1.78268	1.37012	1.26931	1.2738
1.39379	0.800075	0.328454	2.3504	4.6243	2.51502
0.760936	0.990431	1.35337	1.06349	1.58527	2.40527
0.913825	1.52431	1.01555	1.4327	0.215743	0.35007
0.798301	1.46048	0.828549	2.26382	0.995529	1.41529
1.39833	0.781425	1.31906	0.751022	0.858033	0.971747
0.578437	0.904798	0.252762	0.92989	0.480417	0.924328
1.81936	1.01769	0.697126	3.81662	3.82604	1.52358
0.888223	0.70743	0.289106	2.10253	1.39198	1.32627
1.44978	0.607961	0.27842	0.958718	1.42578	2.13436
0.717681	1.26828	0.905981	0.690559	0.59729	1.4879
0.464832	0.36786	2.19041	1.08197	2.55347	0.872343
1.28847	0.35128	2.15853	1.80321	1.01302	3.26349
1.10858	1.86931	3.82108	1.26461	2.7987	1.28605
1.17567	0.620717	4.52732	0.969305	0.556137	3.5521
0.755951	1.26213	0.502655	1.0141	2.26491	0.735039
1.60744	2.02263	2.19903	0.645065	2.59911	6.35673
0.727204	0.683477	1.79698	0.9421	0.970582	1.19439
0.502321	0.656435	1.17555	0.724224	1.18012	4.30103
0.919348	0.887122	1.56103	0.768674	3.55149	0.918645
1.1405	0.969846	1.11647	0.922507	0.263358	1.20629
0.682303	0.859935	0.43184	0.677944	0.640016	1.24587
1.31653	1.51736	2.78978	1.00335	1.23664	0.819514
1.41058	1.75487	1.7911	0.629616	5.0774	0.675778
0.799206	0.824946	0.862865	0.528458	1.63282	4.17873
1.53432	0.80148	1.22908	2.2721	0.742003	1.68126
0.585311	0.69456	0.75087	0.668609	1.14612	2.83286
1.0936	0.892544	1.19928	1.2827	1.78901	11.1836
0.94614	1.26953	7.58947	1.15744	3.34383	0.942916
0.835137	1.15736	0.424647	0.644333	0.470144	0.983397
1.07843	0.855946	1.11124	0.876941	1.26723	1.36621
1.61238	0.789568	1.33019	2.44523	2.29231	0.784086
1.25301	1.23154	1.26701	0.764536	0.70377	0.964244
0.899928	0.85063	1.30356	0.928208	0.841591	1.31779
0.303547	0.969003	0.83775	0.691113	2.60074	0.636491
1.35946	0.756431	0.829035	0.655592	3.89093	0.841626
0.82344	1.21927	2.75976	1.98525	0.644305	3.10239
0.884466	2.07214	1.11808	1.28653	1.3449	1.89786
1.44228	0.611459	0.60463	0.65129	0.523327	2.28048
0.545939	1.02873	1.42451	0.651499	1.92335	2.88443
0.664419	1.41634	2.21894	0.589349	6.52586	1.06909
0.600462	1.72205	1.00903	1.32277	1.87059	0.910846
1.10861	0.813388	0.547346	1.22065	0.561274	0.949087
2.04145	1.39742	0.658443	1.31717	1.47907	0.985061
1.29096	0.533041	0.445352	0.923185	0.830995	1.27605
0.903314	0.707251	1.66345	4.24963	0.34655	1.61593
1.47113	2.19252	0.813715	0.81317	0.637193	1.14016
1.05511	0.865078	2.42904	0.734413	0.264186	7.56047
1.0207	1.34507	0.932599	0.769812	1.47517	1.06213
0.925403	1.26788	1.5882	0.825378	0.17129	0.701878
0.873295	0.755429	0.44999	3.06177	0.605297	2.85848
1.17674	1.85846	2.76158	2.09939	0.5806	1.62859
0.689654	0.876837	0.827678	0.605522	3.86256	1.40957
1.01935	1.64403	0.715658	0.599607	3.01946	0.99246
0.722397	0.841041	1.78513	1.05728	3.92835	0.921984
1.74998	0.949178	1.5434	0.814652	1.80619	0.30922
0.954323	1.53817	0.276509	0.57226	1.08007	1.75187
0.986511	1.42273	0.456492	0.843921	1.57839	0.849321
0.897637	1.21025	1.67542	0.975802	2.97569	0.879458
1.25602	1.70057	1.56322	1.54231	1.5823	1.70989
1.3547	1.20438	0.463026	0.796693	0.699709	1.29207
0.705836	1.11628	1.09038	1.29544	6.08745	6.92548
1.1932	1.4358	0.590268	1.09422	0.517695	12.817
0.731095	1.28078	0.633063	2.67754	1.99659	8.66955
0.584182	0.869197	1.19507	1.28592	1.58083	0.170964
1.48218	1.41446	0.786323	1.3624	1.73282	1.06324
1.3646	0.851278	3.16145	1.61443	2.07782	1.8815
1.19194	1.14627	1.01911	1.59858	3.58092	1.15765
0.580671	0.95709	1.68248	2.22909	1.29292	0.584712
0.743763	1.07338	1.25671	1.11151	2.35282	4.26655
1.4361	1.12997	0.88015	5.08469	6.13757	1.07322
1.33201	1.44153	2.70729	1.76334	1.12988	1.73432
0.88369	1.08836	1.47953	0.96272	4.37769	4.14069
0.901561	0.391519	1.20631	1.01683	1.76678	0.857239
0.783798	0.818825	1.95915	1.21395	1.13948	0.994525
1.03292	1.03921	2.44277	1.16765	0.794544	0.713147
0.88055	0.850768	0.354855	0.633537	2.09243	1.43661
1.0531	0.819293	0.42793	1.24752	0.632825	1.30481
0.641433	0.751522	0.913268	0.72058	0.898565	0.84715
0.593988	0.587417	0.896373	0.771233	1.79877	0.926883
0.66615	0.81888	0.918017	0.534622	1.22781	5.46946
1.5484	1.65407	0.567489	0.683289	4.0858	2.27442
0.829071	1.18037	0.555022	1.19178	1.54386	0.77013
0.811738	1.28142	2.00418	1.68377	0.815804	3.35457
0.931273	1.33293	0.287147	1.08795	0.625402	1.13464
0.771221	0.707131	0.640239	1.26773	2.09059	1.48018
1.06589	2.33368	0.484914	1.45054	1.07089	1.02244
0.512381	0.516184	2.03004	1.64927	2.65006	0.787365
1.39173	0.333035	1.13143	1.23485	0.956281	1.21739
1.53305	0.772684	1.02131	0.356422	0.214958	4.1802
0.629027	0.622468	0.503128	1.3093	2.5792	4.72852
0.968188	0.962292	1.3716	1.31747	2.26358	1.08903
0.663434	0.843845	0.86248	0.857003	1.42438	0.993026
1.04389	0.775558	1.92266	1.14001	0.89823	2.76039
0.469289	0.912283	0.371921	0.719638	0.958959	1.0753
1.19694	0.655758	1.0254	1.96362	2.8205	3.54132
1.06042	1.68914	2.2864	1.49903	1.7701	1.82794
0.758413	1.24431	0.293922	1.0461	1.84597	2.10427
0.781541	0.589335	0.531407	0.688894	1.8931	1.94709
0.390879	1.11183	0.4212	1.62808	1.75888	0.105079
0.569461	0.898568	0.778609	1.53914	3.45993	1.15416
0.812926	0.85611	0.731381	1.00668	3.96078	5.64135
1.57881	1.22208	1.02543	0.562492	1.18284	1.18403
0.657757	0.992259	2.15548	0.984952	0.214818	1.64559
0.7609	0.755336	2.66188	1.34561	1.91973	0.791047
0.759114	0.698267	1.0017	1.05173	1.45635	1.16476
1.08622	0.967955	1.25453	0.896723	1.84904	0.507509
1.11942	0.770557	1.40729	1.02202	0.418176	1.03185
0.487367	0.802375	0.979	0.828461	2.78294	1.29581
1.22048	1.35116	0.872361	0.858216	1.30647	3.61768
0.760147	1.14568	2.38957	1.16929	1.06086	1.11516
0.959313	0.864669	0.637228	0.846126	5.11806	1.48841
0.653658	1.01016	0.587637	1.57316	1.70892	1.20751
1.45635	0.729337	0.556323	1.65159	1.12734	0.584412
0.885685	0.849086	0.163871	1.24867	0.607178	1.45191
0.595224	0.714933	1.57811	3.59656	0.756661	4.32181
1.18191	2.26987	0.732789	0.864342	2.76377	0.852944
0.490631	0.817544	1.78313	0.82797	2.13144	3.25063
1.26608	1.06175	1.50185	0.786242	0.793866	0.291213
0.992739	1.30728	2.11537	0.78388	0.719837	0.601009
0.71451	0.98364	0.288667	0.48333	1.23429	1.96157
0.468233	1.73128	1.87192	1.42572	2.57662	2.32492
0.89132	0.528366	1.05795	0.582543	1.03534	3.83053
0.821738	1.23166	1.78659	4.52351	1.56662	0.661505
1.64228	0.709229	0.893023	1.00025	0.412395	2.00107
0.873854	0.819218	0.765173	1.29266	2.04845	10.9619
0.96615	0.784222	1.63394	0.889725	1.94471	1.76615
0.664236	0.570193	0.944389	1.35462	1.16421	4.75587
0.999459	2.39973	1.40685	1.81396	0.091212	0.865446
1.02137	0.829096	1.02081	0.725489	3.18892	1.05844
0.951373	0.671768	2.12169	1.19384	2.16745	0.993868
1.16938	0.920118	0.9718	0.71901	4.69021	0.455336
0.948169	0.686871	1.23907	2.31249	0.764505	1.19738
0.907866	0.90774	1.29326	1.17351	0.61884	2.17155
0.53508	0.730203	0.813671	1.17288	1.16913	1.93512
0.73081	0.673834	0.672093	1.4466	1.34958	3.11941
0.435708	0.706745	0.582547	0.677686	2.97179	3.1282
1.95476	1.06597	0.939996	0.458638	0.17436	5.6629
0.56654	0.370042	2.10121	0.849463	2.29485	1.12284
0.687467	1.11171	0.791701	1.53235	1.98243	2.58823
1.00088	1.19083	2.32115	2.06672	1.15383	1.42379
0.665235	1.2054	0.901671	3.45901	0.315843	1.04901
0.889146	1.17551	1.09581	1.28474	0.815337	0.968434
1.03155	0.880189	0.755603	0.980717	0.857521	0.32167
0.856948	1.1127	1.1308	0.76146	1.16828	1.36734
0.804697	0.661061	0.860814	1.16461	1.93909	8.81511
0.986085	0.543543	0.891677	1.16772	1.76202	0.719251
1.53021	0.893375	0.772961	1.90629	0.420527	7.35343
0.74325	2.00647	0.510547	1.40205	1.40885	3.46096
1.01866	1.07226	0.425921	1.1401	0.765849	0.99866
0.537231	0.949838	0.374973	0.841473	0.753331	1.0661
1.5056	0.950748	0.657658	1.15377	1.90822	0.951435
1.10694	0.761108	1.13641	1.41136	3.33777	0.64845
1.21269	0.701851	0.888871	0.875733	1.80233	2.97005
1.66063	0.294833	0.418618	1.68586	1.06745	0.464624
1.32456	1.19695	1.16668	1.05046	2.93374	3.19291
1.69246	2.54562	0.514924	1.62184	0.553299	4.72632
1.17572	0.327	0.686155	0.87357	1.39778	1.20134
0.741501	1.03184	0.745476	0.578636	1.57384	2.63817
1.26747	0.657089	0.35777	0.890464	2.26912	0.329602
0.862898	0.813116	0.728087	2.06229	0.699578	3.22442
0.611794	0.802436	1.47104	2.07299	4.52153	0.456694
1.40677	0.511977	1.35687	2.61026	0.957477	3.34592
0.828777	2.71209	2.14217	1.54505	1.30666	1.56876
0.885409	0.827055	0.749588	1.38366	0.906813	2.40104
1.85155	0.723964	1.13593	1.95429	1.74162	3.12978
1.54189	0.856607	1.33579	3.8143	0.155109	1.34617
1.33178	0.966515	1.14915	0.701388	0.491452	1.04121
0.640588	1.04743	1.18965	1.1747	9.74775	0.40937
2.41847	0.646305	1.54646	3.62832	0.597939	0.806859
2.13984	1.08903	0.784932	1.83092	1.66555	1.53139
0.612226	0.89082	1.69274	3.20736	2.07804	0.917583
0.965225	1.27626	0.759845	1.13994	1.42267	1.71443
1.42856	0.749178	2.07122	1.26376	2.2995	6.30439
0.634678	0.876675	1.195	1.72552	2.72799	3.62478
1.44628	1.72493	2.28982	0.942561	0.643645	1.98647
1.41954	0.787465	0.475993	1.05665	0.729552	2.55407
1.07882	0.760153	0.990224	0.799964	2.50196	1.359
0.597245	0.49379	0.440351	1.22616	4.16725	7.8639
1.74925	0.817584	1.06237	1.8912	1.49449	1.1844
0.562205	0.745584	0.97724	0.942319	3.20888	12.3208
0.585462	0.573595	0.41892	1.46433	0.57429	4.62102
0.640928	0.582232	1.36994	1.04843	6.14818	1.75263
0.67737	1.1922	0.459628	1.7649	0.955336	1.77106
2.36829	0.552607	3.28399	1.70618	2.60156	2.63739
1.13952	1.14267	0.880155	1.12544	1.27257	2.24432
0.832386	0.790922	0.581102	1.54867	0.550673	2.83806
1.79926	0.951728	0.539805	1.32956	2.05549	2.16028
1.2255	1.50236	1.0612	1.53366	0.270256	0.91284
0.577502	0.716534	1.81402	4.12187	1.1543	3.34562
0.846848	1.02233	2.00205	0.930104	1.25178	3.92512
0.576504	0.655209	1.75978	0.577635	4.56507	1.68171
0.380539	0.87226	0.664689	1.307	0.54024	0.933167
0.759154	0.601957	1.28092	1.45064	1.65632	0.427127
0.522631	1.00039	0.70394	0.986523	0.973831	1.22703
0.760109	0.555	1.03013	1.19189	2.5324	0.632506
0.718992	1.38342	0.914421	0.401009	1.07336	5.59245
0.533676	1.65694	0.933634	4.3066	2.13117	4.09152
1.4044	0.742436	1.33381	1.03678	0.980486	1.19709
0.734436	0.684092	0.592071	0.68863	5.21324	3.96395
2.12775	0.931573	1.48561	0.542319	1.85193	0.147281
0.936381	1.24662	1.30027	0.543908	1.7083	4.39828
1.84608	0.959009	2.37819	1.31517	0.816596	4.7412
0.950994	0.807795	0.922392	0.547508	1.20051	2.53834
1.93128	0.849997	2.34978	1.14581	1.02457	0.39222
0.823299	1.0743	0.587798	0.802608	2.42151	0.191946
0.356739	0.313974	0.348492	1.12322	1.89223	1.52145
0.870737	1.23247	0.755772	0.764879	3.69543	1.19042
0.702879	0.826077	0.941694	1.84538	1.70357	5.49715
0.888445	1.48601	1.51343	2.06958	1.92024	1.59747
1.15647	1.02474	1.40976	0.825944	5.89132	0.552027
0.658391	0.701202	1.64623	2.10652	1.59907	1.02742
0.951204	0.894721	1.00587	0.932098	1.27643	1.53369
0.770637	0.65762	2.41062	0.785581	1.62556	0.085342
1.20006	0.774781	0.975887	1.26279	0.723554	0.924112
0.932175	1.27676	2.71501	0.99392	2.53269	2.48723
0.473109	0.58295	2.04359	1.54605	1.18206	2.04706
1.24813	0.980043	1.5862	0.779644	1.21595	6.92183
0.624096	1.83377	1.56578	0.914903	3.03197	1.10443
0.643244	1.29052	0.96901	1.41123	1.00876	7.14238
0.572955	0.830639	1.67132	1.36193	10.326	1.30356
3.55651	0.739515	0.594591	1.16883	4.59892	0.53119
2.32524	0.979703	0.618008	0.660535	1.04323	1.12904
0.560695	0.909936	1.20577	1.2304	7.87155	0.993161
0.617139	0.782962	0.959413	0.779287	0.257903	0.463866
2.03109	0.703804	1.00889	1.56343	0.975451	0.352969
0.690518	0.328604	1.35447	1.03995	1.06567	0.562908
1.5127	0.700837	1.11213	0.948479	3.91167	4.31653
0.540834	0.641544	0.43617	1.42788	3.64078	0.509389
0.670846	3.67175	0.474712	1.02135	1.80722	3.22932
0.60134	0.695515	1.14914	0.801568	2.25871	2.61573
0.647671	0.886097	1.55217	1.13754	2.8781	0.879139
1.28333	0.851153	0.374981	0.608951	4.73237	1.36693
1.38664	1.2754	2.03917	0.778885	0.64277	0.427198
0.97108	1.14955	0.791515	1.00783	0.6987	1.12666
0.891935	1.71537	0.549224	1.2391	1.74891	0.84761
0.938923	1.28142	0.71261	1.66741	1.14234	2.37115
1.39568	1.07283	1.71781	0.687614	2.93396	0.904605
0.531098	0.844365	1.65904	0.648023	0.736951	0.797803
0.528247	0.906921	0.626494	1.83252	1.39185	1.61109
1.35924	1.42246	0.82108	0.90552	0.913534	2.30712
0.986314	1.17379	1.88081	0.794564	6.12232	3.59167
0.936089	1.22734	1.09037	1.53507	0.200274	0.451135
0.683729	0.985222	0.825399	1.14409	1.30938	1.18377
0.868489	1.10328	0.356949	2.52984	0.543424	1.29457
1.45097	1.37946	0.690226	0.957395	1.66891	1.7001
0.89868	1.36996	2.23827	0.870674	5.0869	3.43283
0.914173	0.871044	0.774697	0.525274	0.569519	1.02985
1.32132	0.989574	0.451635	0.897783	0.90099	0.181863
0.467035	1.24647	1.09473	1.5732	1.49768	0.469929
0.938284	0.37851	1.0964	0.716602	0.614002	2.88776
0.765991	0.950691	1.97603	1.18785	4.41272	3.98631
1.27488	1.1134	1.99528	1.10831	0.563712	1.0467
0.748417	1.02415	0.609344	2.54702	0.786594	1.86653
0.606664	0.865593	1.20873	0.518456	1.17724	0.597451
1.6724	0.893615	1.69472	0.548861	1.35281	0.139772
1.5312	1.8337	0.494943	1.88301	0.956739	0.191221
2.18304	1.78855	0.987205	1.17979	1.11748	0.318752
0.550897	1.04853	1.16099	0.648736	0.630882	1.61965
1.37484	0.921242	1.0872	1.06065	0.162104	2.88922
0.995588	0.825312	0.823621	1.49172	1.8568	1.83146
1.7014	1.1087	0.483683	1.38255	0.827957	3.15089
1.00364	1.0775	2.85575	1.39058	1.43006	3.89945
1.90097	0.628435	1.91561	0.221579	1.08781	1.90851
1.05528	0.894978	1.68388	1.11952	3.12028	1.54123
0.649567	1.19681	0.531418	0.416037	1.22451	2.23181
1.70317	0.64396	1.49818	1.08308	1.23974	0.082536
1.6775	0.684206	2.56325	1.24388	1.67354	2.99115
1.01132	1.05266	2.13705	0.642678	1.4951	0.266252
2.02916	1.27296	2.87963	0.792004	1.20895	2.0505
1.10178	0.548748	1.11879	1.49219	0.82181	1.68556
1.49704	0.566214	0.963906	0.612814	1.46714	1.49478
0.688494	0.694226	0.809176	0.603855	0.357939	1.47101
1.43814	0.720533	0.750782	0.504376	0.597612	2.24437
1.54259	1.25127	0.850885	0.943118	3.56658	2.99077
0.910279	0.881789	0.934587	1.31214	0.491174	0.959851
1.43564	1.32031	0.727504	2.0374	1.066	2.26056
0.451763	1.39137	0.658339	0.376552	7.32717	3.55973
1.58437	0.51785	2.94726	1.76067	0.662592	5.28802
0.794278	0.420714	0.64734	1.73244	1.55721	1.5938
2.16801	1.12617	1.48699	0.652808	2.59811	1.44662
2.15693	3.03567	0.867631	0.636034	0.522009	2.4545
0.276221	0.638206	2.15753	0.613751	0.194188	2.77052
2.66069	1.53112	0.771113	0.562151	2.97801	0.739203
1.15099	0.879922	0.988731	0.938991	1.18602	1.16567
0.935697	0.822746	1.75659	0.489281	2.99386	1.04884
0.956493	0.949633	0.664908	0.952088	0.105124	0.658608
0.786061	0.827247	1.66085	0.953414	2.72241	1.17016
2.07424	1.1992	0.267663	0.593651	1.4731	2.925
2.0309	0.7454	1.28862	0.549819	0.498457	0.775685
0.494845	0.713693	0.467332	0.263502	2.2543	2.10187
0.91851	0.982336	0.650234	2.08469	3.92288	1.79748
0.644816	0.558689	1.27349	4.66406	4.9213	2.10478
0.546909	0.814105	1.74534	0.62146	0.917032	0.412265
1.3172	1.41206	1.53937	1.03697	1.44331	0.493815
1.24341	1.09456	0.611849	1.34945	1.96256	0.413109
1.13417	0.838278	0.916554	0.531587	2.57873	2.07655
0.307189	1.12703	2.96897	0.409227	0.688666	1.29872
1.0237	0.71934	1.66309	1.85453	0.986894	0.173881
2.32939	0.489049	1.04864	1.40373	1.3827	2.32636
0.641553	0.63543	1.29791	1.16598	3.13086	1.35858
1.33832	1.30271	0.598847	1.47419	0.37702	1.56528
0.37186	1.27641	3.31014	1.1725	1.18513	0.714106
0.872014	2.42569	1.08692	0.576012	0.395359	8.66881
1.11177	0.507839	1.10628	1.54984	2.80285	2.52224
1.18174	1.41882	1.95279	1.70116	0.998756	0.34263
1.86477	1.44745	2.03328	1.91981	1.11061	3.10242
1.15885	0.958918	1.12044	0.672413	0.994638	0.7812
1.03393	0.788818	0.87229	1.0038	0.624642	1.21672
1.21146	1.36932	0.492961	0.873918	0.681087	3.00984
0.935557	1.17976	1.68867	1.13156	1.38811	0.721645
0.52773	1.63978	0.928287	0.854846	0.759752	0.841687
0.742017	1.66817	1.91715	0.666794	0.787209	0.879153
1.32226	0.669834	0.710233	1.67109	1.95719	3.68798
1.67559	1.61592	2.8872	5.84704	0.453179	1.69718
0.756534	0.80316	1.96644	0.861938	3.29763	1.41636
1.87836	0.503947	0.548369	0.533337	0.660965	5.82467
0.466579	1.74343	0.369978	0.988194	0.966827	5.25879
1.31902	0.984599	1.7619	0.566584	0.602089	1.23739
1.78902	0.932574	1.88334	0.623633	0.409769	1.86825
1.37383	0.470038	0.769776	1.81173	4.03125	6.8525
0.819369	0.935655	0.667378	1.4545	0.615373	3.57253
1.74753	0.459589	3.14328	1.95723	0.995254	0.741832
1.36497	0.588818	0.486699	0.917329	1.55275	4.0876
0.401119	0.847359	0.507886	0.770924	0.548909	0.553517
1.28431	0.815224	1.99333	0.264075	1.0693	2.28054
2.74715	0.897917	1.57712	1.56241	1.0112	0.648194
0.875762	0.717014	0.441593	2.61939	1.58501	0.658582
0.590346	1.67264	0.584155	0.708816	0.605714	0.563961
1.71591	1.3476	0.844947	1.46831	0.296163	0.900566
1.64135	0.706423	0.536638	1.23367	0.712807	2.20169
1.3623	1.18958	1.45301	0.130847	1.248	0.844315
1.00181	0.398733	1.61303	2.55029	0.529254	0.338231
2.21288	1.45983	1.00761	1.18533	3.426	2.00852
1.03061	0.750773	1.32579	1.21435	1.65996	2.12161
1.06045	0.688626	0.740262	0.445071	0.617089	2.68418
1.15252	0.69945	1.25286	1.044	0.967143	0.402314
1.61322	1.55524	2.02901	1.16623	0.47414	0.696573
0.380304	1.07143	1.88986	0.68854	0.491484	1.68486
3.54342	0.685891	1.30579	1.16171	0.560294	0.709553
0.92157	1.59571	0.754093	1.71763	2.6613	2.35303
1.75649	0.579114	0.798716	1.79642	0.62093	4.18612
2.10924	0.940738	0.901444	0.720559	0.743335	6.32687
1.51969	1.50958	0.48932	0.815663	1.36672	1.07284
1.39864	1.38004	1.30711	0.462212	0.554313	0.993401
0.947407	0.254407	0.436334	0.95159	0.50181	3.29175
1.70617	0.549007	0.683168	0.799813	2.50494	1.32614
2.3238	1.81818	1.93831	0.879944	0.875727	2.87334
2.38248	0.649701	3.45241	1.04274	0.163545	0.479261
1.6818	0.984702	0.537012	1.93721	6.85151	1.92475
1.02485	1.09083	1.63044	1.22598	0.4499	5.40626
0.963206	0.777601	1.11195	1.94663	1.32918	5.93192
0.669563	0.727506	0.676323	0.626201	0.158134	1.1502
1.59835	1.04298	0.380194	0.264972	0.311223	0.81462
0.74178	1.04124	0.72346	2.07196	1.05454	1.05203
0.727397	1.12485	1.09257	1.04613	0.59622	11.6971
0.444434	0.657647	1.00463	0.787322	0.163214	2.45218
0.503152	1.37884	0.742926	1.01739	1.43676	3.61671
0.773111	0.706373	0.806645	0.591362	0.48343	1.48052
0.800588	1.06403	0.901202	0.406752	3.30317	2.8964
0.609427	0.626078	3.11959	1.35376	1.00512	1.13797
1.36139	0.366014	1.18528	0.748648	0.618904	1.70069
0.813617	0.857494	0.505251	1.88368	0.339511	4.19235
1.79716	1.38274	0.646449	1.91487	0.493773	1.70677
0.472405	1.08869	0.900054	1.31629	0.546152	6.63912
1.48487	1.42228	0.932201	1.33594	0.577839	5.75759
0.607062	1.48632	1.25879	0.604807	0.329298	1.97203
0.863104	1.25824	0.703621	1.43207	0.917796	2.87841
1.46846	0.683315	1.63407	0.746588	0.962868	3.9219
1.49345	0.722478	2.46085	1.68363	0.526012	8.19285
2.45786	0.55772	2.32475	1.48253	0.565838	0.890003
0.43401	2.02312	2.18921	2.65898	0.737622	1.7812
0.650471	1.12697	2.75793	0.450479	0.740583	2.5792
1.42151	1.28796	0.527316	1.80554	2.64905	1.81001
1.49041	1.28101	0.956917	2.47176	0.576084	1.23378
0.477538	0.708401	3.39099	0.686528	0.6682	10.5195
0.789389	1.3338	2.10168	0.60232	0.998253	2.33917
2.07135	0.930925	0.370864	0.780527	0.560196	2.47014
1.58409	1.09749	0.879025	0.606999	2.14037	5.75769
0.795633	0.689798	1.55541	1.04866	0.623239	0.566269
2.51118	1.30806	0.595334	0.314127	1.65929	0.683729
0.489689	1.07454	0.868554	1.35782	1.67451	4.86599
0.838151	1.21366	1.67655	0.367396	1.10055	0.827033
1.48837	0.896361	1.70896	0.738627	3.62156	3.9475
1.94657	1.53176	0.701855	0.752067	0.738182	1.26437
0.987013	1.05998	4.21787	0.869603	2.08745	1.2947
1.24107	0.640478	2.00249	1.69408	3.96424	5.37376
0.50089	1.17896	0.445039	1.01252	0.603023	2.17448
0.714663	0.99343	0.974837	3.01573	0.649815	1.20312
0.877223	1.25184	1.60832	2.05543	1.94829	4.77179
0.617459	0.476969	3.17605	1.10464	1.60056	1.52965
1.32195	0.791345	0.804682	3.68653	3.19183	1.96069
1.28632	1.33815	0.869229	3.28912	0.8444	2.04114
0.594923	1.30803	0.485153	1.18914	1.55831	1.18126
0.62587	1.0369	0.813238	1.0696	0.381577	6.58003
0.861745	1.06478	0.53924	1.75047	2.07771	1.90552
1.02019	0.68139	0.514256	1.09827	1.08971	0.673281
0.190795	0.787492	1.44555	0.645468	2.17267	2.0097
0.365294	0.903351	0.743816	0.543174	1.53115	1.5132
0.368812	1.05214	1.55619	1.6298	1.06769	5.95175
1.17964	0.853216	0.866472	0.482672	6.79997	6.48306
1.29336	1.6144	0.433095	0.848224	1.41706	2.33536
2.96362	0.937563	1.28093	2.18029	0.872853	0.838838
1.46472	0.703391	0.766119	0.493719	0.457746	2.15459
1.33833	0.3673	1.13857	2.00509	0.924907	2.13704
1.08768	0.612004	1.21372	2.16435	0.967149	3.39916
0.841763	1.90048	2.06115	1.66943	7.40313	0.29381
1.13903	1.0896	1.6809	0.755763	2.59398	1.87801
0.730972	1.53021	2.65534	1.03329	0.609682	1.15233
0.411294	0.855148	0.508581	1.92172	0.686822	1.84669
0.554401	0.657522	0.858331	0.496505	1.44336	11.7011
0.947405	1.24073	1.68344	0.737627	0.871229	3.99995
0.410724	0.705356	0.964868	0.803088	1.06948	2.67001
0.4081	0.464618	0.950153	1.58657	1.56548	0.783072
0.487317	1.70159	0.634157	1.6771	2.31219	1.87092
0.872801	0.809881	0.593254	0.668736	1.21105	13.8936
0.779234	0.973027	0.737981	0.331175	1.11372	2.68621
0.506907	0.888223	0.701057	0.390767	1.62955	3.2459
0.514455	0.353643	0.713155	0.630868	0.690137	4.74212
1.34637	0.776717	0.99053	4.0123	0.752691	0.210969
1.58112	0.641667	0.41068	3.92424	0.67591	1.08909
0.530746	0.944826	1.56543	0.51354	1.2512	5.19152
0.92513	1.40127	1.17253	0.504438	5.16047	0.946037
1.33296	0.94532	1.50544	2.54902	1.03696	9.45553
0.726118	0.868465	1.25506	1.70298	2.10497	3.07392
0.601349	0.662512	1.08413	2.62877	0.646074	5.19833
0.67027	0.911322	0.838946	0.742547	0.91688	3.90076
0.71529	0.606179	1.98954	0.733275	4.26201	2.10476
1.31135	0.951661	0.770862	1.55076	0.925739	4.19536
0.615037	1.38261	0.529962	1.09649	7.63732	0.193452
0.609064	0.631567	1.38608	2.4461	1.57534	3.25059
0.277555	0.975697	1.90409	0.718999	0.868244	4.44874
0.646607	0.917774	0.986426	1.99855	1.01507	3.12325
0.487944	1.15826	1.22327	0.921267	1.33401	0.169872
1.09058	1.68143	1.32412	0.633552	0.644455	3.35963
0.953109	1.09914	0.791583	1.70115	1.02601	2.83773
1.2924	0.634075	0.535573	0.671806	1.2813	4.73946
1.40409	1.29803	0.79994	1.63414	0.830629	1.95566
0.591169	0.973681	0.593708	1.21453	1.27834	2.30399
0.31279	1.34543	1.56344	1.43434	2.73815	2.97525
1.2268	1.01769	1.24416	1.88544	0.527459	1.65873
1.83616	1.23587	0.900084	1.34499	1.23539	3.53308
0.75074	0.616471	1.04312	2.49323	1.4345	3.32362
0.410998	1.6289	1.66487	0.986053	5.22756	6.76248
1.88746	0.675582	1.26068	0.929497	1.78351	9.68964
0.881151	0.926751	1.42551	2.48506	2.28417	1.70579
1.22928	0.919336	0.851415	1.01402	1.11742	2.1866
1.13432	0.525683	1.29795	1.21055	0.630665	3.09153
0.421784	1.11575	1.07983	1.52974	1.1999	2.17836
0.689779	1.83173	0.583562	2.42753	2.18631	3.27826
0.388057	0.764529	0.741738	2.26644	4.12439	2.24708
0.623414	2.41215	0.608205	1.19839	1.36992	1.39152
0.544756	1.55192	0.957204	0.748458	0.913896	0.732894
0.319792	2.54625	0.474875	0.576181	8.72317	3.20383
0.461233	1.89022	1.00429	1.76761	0.789793	0.475843
1.1465	1.58193	2.34541	1.68869	3.09738	2.34043
0.954776	0.762815	0.776269	0.779731	0.47272	2.96277
0.810663	0.681778	1.10226	0.79895	1.47231	2.17371
0.410832	1.32286	1.77196	1.16858	1.44367	0.200202
0.333704	1.41572	1.72307	0.498216	5.02983	4.07773
0.635833	1.14609	0.888089	3.93829	1.70269	3.69322
0.699864	1.28988	1.06769	1.69799	1.24343	1.44046
2.30494	0.808864	0.82075	0.753599	1.06743	1.41232
1.22263	0.654934	1.25944	0.763818	0.536604	1.36434
0.597758	0.969503	1.85993	1.43906	4.8188	0.704469
0.506279	0.911878	0.607033	0.972035	0.708354	0.745439
0.522242	1.69633	0.492186	2.88222	1.73494	2.03889
0.796021	1.79323	1.58586	1.93986	3.11976	0.168394
0.348902	0.857036	0.578736	2.52125	1.07773	2.94957
0.567828	0.76803	0.909752	1.21613	1.3506	3.75683
0.729974	1.21191	1.31319	2.59606	2.49661	1.82743
0.348729	0.71332	0.431204	1.34672	0.902161	5.3416
0.626991	0.763675	2.79959	2.8033	3.25757	3.57072
2.00981	1.06041	1.27492	0.892677	0.471508	8.82855
0.477462	1.204	0.743031	1.04795	1.12124	2.71493
0.409556	0.642471	1.93231	1.25438	0.788404	2.86179
0.918279	0.96131	1.51364	0.464715	4.00182	0.528008
0.544609	0.56279	2.20132	2.12604	2.11143	1.59022
1.07995	2.1892	2.11052	0.386216	2.49241	5.25511
0.576344	0.495826	1.91123	1.82607	6.90141	1.93659
2.21689	0.770028	0.918863	0.616909	0.963236	1.22932
0.508174	1.30735	1.55112	1.61078	1.76793	1.47485
0.348579	1.26453	1.50489	0.933584	1.54658	2.36546
0.913875	0.588769	0.89218	1.36494	1.74808	2.49102
0.293587	0.596294	0.990441	0.674276	1.14602	4.25592
0.713121	0.688356	1.49792	1.5842	6.98128	2.36207
0.483614	0.738483	1.21529	2.11885	0.780087	2.44089
0.710946	0.961651	0.63904	1.58515	1.74632	2.18758
0.781846	0.572191	1.29007	2.32359	2.87923	5.03654
1.05248	0.401317	0.794652	0.42203	2.28265	3.76721
0.939584	0.729984	1.79574	1.20674	0.855464	0.71056
0.853346	1.90877	0.651199	1.65616	5.85953	1.50871
0.597026	1.81999	0.890735	1.20174	0.354047	1.66652
0.714622	0.962741	1.15284	0.479074	3.45404	1.7074
0.711343	0.818199	1.77473	1.57689	3.09262	2.64637
1.75003	0.798514	0.358802	0.505199	1.31913	8.36548
0.353861	3.23418	2.60003	0.846183	2.41769	1.65227
0.662656	1.7965	1.13895	3.11626	1.17366	2.68821
0.852753	1.70886	0.840165	1.03386	3.94531	0.363792
0.81641	0.831837	0.700815	2.60113	1.54901	2.38154
0.712311	0.381342	2.35778	1.81273	0.507175	0.523167
0.621025	0.620077	0.922368	1.14908	1.12147	2.61944
0.817714	1.49647	2.64887	2.07341	5.23574	2.47941
2.2683	1.82779	0.669871	0.935278	2.19162	0.581664
0.543876	1.06088	1.27077	0.842975	2.13108	2.21972
0.610322	0.973799	1.58945	2.56575	0.847287	4.11735
0.370056	0.316537	0.745241	2.29155	1.6943	0.310006
0.27356	0.770316	1.95561	2.1794	3.39796	5.75285
0.427112	0.551625	1.41848	1.07099	0.995685	5.72491
0.684491	0.634597	2.3857	1.34098	5.10418	0.678581
0.33137	0.883043	1.34904	3.60213	0.784592	2.62311
0.371447	1.40415	1.81477	0.749029	1.61043	1.13055
0.580447	0.632541	1.88584	0.815902	1.30912	0.963441
0.447189	2.16063	2.38837	1.98418	1.32838	0.814164
0.789228	1.3466	1.70674	0.812856	1.7946	0.659536
0.596798	0.637915	3.55649	2.82609	2.2846	2.59227
0.314987	1.45678	2.13368	1.45572	1.53253	1.62875
0.387005	0.6797	0.597703	0.728317	1.17978	0.637969
0.315541	1.02523	0.725664	0.649744	3.06747	0.752686
0.616468	1.15944	0.905158	0.592665	2.09034	1.35926
1.09292	0.710179	0.719828	3.07076	1.74454	7.9583
0.770224	1.23147	0.830004	0.671866	0.18321	4.26492
1.09128	1.36229	1.85309	0.503806	2.08285	2.06813
0.51218	1.86702	2.4021	1.29899	1.0145	3.25178
0.36468	1.47073	0.491805	0.573931	0.800613	0.986586
0.356483	1.29248	3.04018	0.910798	1.53106	0.377865
0.646267	0.38309	0.945971	1.72431	2.01742	0.230465
0.597265	0.618339	0.595495	2.08466	1.47604	2.10473
0.385995	0.88685	1.85161	3.14673	1.79484	3.2925
0.429852	0.753013	2.31343	2.74734	1.08307	3.01033
3.276	1.84055	0.951283	1.07092	4.53639	4.28289
0.473873	1.02189	1.26676	1.57922	1.95281	0.977755
0.639543	0.855534	1.5091	1.94698	1.59121	0.442275
0.547563	1.26741	1.1388	0.939453	2.38342	1.16076
1.65593	1.49909	0.569998	1.08172	1.36421	1.11784
0.789047	0.696798	1.79699	2.09341	1.07247	0.20127
3.1153	2.04547	1.84946	1.32997	1.39042	0.449119
0.412685	1.01606	2.3582	1.98055	1.33619	2.38767
0.657874	0.967911	0.889093	0.611621	1.26029	0.550235
0.377294	1.60887	1.30475	0.586299	1.97258	0.253107
0.371505	1.17679	0.750425	0.63987	1.09953	0.706152
0.823175	1.32204	1.18729	1.19586	1.43244	0.233442
0.863639	1.40759	0.60534	0.875288	2.86902	1.60644
0.554023	0.365189	1.95663	0.681355	0.600516	1.56417
0.787391	0.868403	1.10441	1.11703	0.675344	1.38959
0.412585	1.44898	0.536472	0.617644	1.20917	2.16725
0.746365	1.18109	0.859175	1.45872	0.882397	0.542906
0.957979	2.01782	1.72567	2.06138	0.835262	0.626573
0.294393	0.518996	1.3334	0.407256	0.956595	1.03507
0.437234	1.33189	0.961487	0.600813	1.61863	0.494094
0.487342	2.56161	1.31429	2.14144	0.666214	1.2775
0.244197	1.24018	1.95677	0.701631	2.56955	1.1932
0.344353	1.83867	1.48549	1.39277	4.20325	2.52397
0.691232	0.868132	0.578257	1.45722	1.15849	0.856215
2.96973	0.93115	3.19806	1.2004	2.13607	2.60667
2.46563	0.527173	1.52117	0.837351	1.07735	0.785157
0.359386	1.58502	1.507	1.1655	2.94662	1.14118
0.423724	0.998367	1.17428	1.36167	1.83586	0.487549
0.630271	1.00082	0.86556	2.27306	0.308994	0.581745
2.92889	0.987888	0.8988	1.87936	0.362494	0.56922
0.595128	1.25321	1.04714	2.15724	0.746901	0.493732
0.41627	2.01434	0.996575	0.48306	3.0339	1.06129
0.588876	0.856659	0.764946	0.85853	0.811672	2.54881
2.83215	0.70976	1.09118	0.556696	1.99346	0.123459
0.635533	1.059	2.86269	0.854925	1.5277	1.65834
1.20227	0.958137	0.915317	0.429633	1.09419	0.931339
0.400826	0.774823	1.46747	1.67296	1.42912	1.51276
0.460303	1.26632	0.329775	1.13856	1.52741	5.84887
1.78113	1.27804	2.16838	1.9357	1.82347	2.70421
0.642885	0.917043	3.51157	2.44737	3.10931	0.063211
0.747769	0.57433	2.30371	0.521377	2.40998	0.316948
0.791442	1.28617	2.09164	0.367074	2.65232	0.636924
0.619361	1.07112	0.719969	1.03094	1.50021	5.8033
0.462351	0.9213	1.17949	0.856209	1.29187	0.415435
1.15342	0.515968	2.74974	0.746611	1.94966	5.48695
0.791267	0.418323	1.46673	1.5709	2.25045	1.14569
0.352754	1.44544	0.802043	4.03276	1.5473	0.509111
2.03636	2.01479	0.67205	0.739491	2.92091	0.775839
0.703301	0.745837	1.99115	0.691345	1.20485	0.195308
0.224367	1.46864	0.497908	0.675861	0.681721	2.29749
1.16311	0.463961	1.7896	0.903844	3.55742	0.193155
1.4439	3.13642	0.703048	2.38275	0.880265	0.397535
0.484234	1.25304	1.7215	1.43978	0.982499	1.19671
0.687216	0.642054	1.49156	2.53871	0.489009	0.250093
2.74763	1.16996	1.56022	1.08551	1.09502	1.28316
0.477722	0.431798	0.643938	0.627636	0.860554	0.483862
1.69531	1.85297	2.18788	1.07486	2.19777	1.71138
1.10711	1.15992	1.16681	1.3743	0.808497	0.449911
0.472505	0.814484	3.64379	0.904818	2.15125	0.76691
0.389615	1.13738	1.05509	0.946542	9.76217	0.166827
0.477727	0.692352	2.06225	0.660096	2.76077	0.5863
0.836028	1.40083	1.43157	1.12392	1.3531	0.372196
1.55652	1.02785	0.653101	1.2316	0.686005	0.425652
0.378353	1.32294	1.23312	1.28484	1.0196	1.63053
0.534773	1.71409	1.39459	2.53368	4.46029	1.72343
0.479708	1.05009	0.646299	0.591892	2.60077	0.639403
2.13863	1.27979	0.811977	1.06824	1.59044	2.08003
2.12512	1.96467	0.891919	0.7425	0.796718	0.531038
0.784134	1.77053	1.31831	1.51222	0.833944	0.375111
0.762713	1.21772	1.99186	2.08679	2.36002	1.23901
1.29533	0.711626	2.31377	1.16254	1.07193	0.283228
1.15558	2.51393	2.64311	0.779895	1.81986	0.547646
0.670965	3.29553	3.00985	1.25057	2.25751	0.482996
0.491025	1.75401	1.1434	1.30559	2.14102	0.239373
0.544446	0.663825	1.04715	0.77947	0.677635	0.32231
0.480296	1.26061	5.61698	0.569194	1.42483	0.878117
1.29847	1.3838	0.922014	0.938557	1.03774	6.60012
0.650175	2.45165	1.73743	1.28559	1.16067	1.25887
1.16615	1.08407	0.845012	0.82058	2.15856	1.35028
0.417979	1.16604	0.477811	1.97111	0.549601	0.280561
0.699254	1.28183	3.65227	1.18147	1.49389	0.360247
1.28158	0.814169	1.75012	1.8222	2.34083	4.7738
1.54492	3.2441	0.376951	1.58925	2.15005	0.311531
2.5085	1.41327	1.53911	1.27411	0.557611	1.71266
0.847626	1.29082	0.617486	2.72691	1.45924	1.88026
0.381636	0.653647	1.85122	1.70925	0.970999	0.598437
0.79805	0.818169	1.235	0.643438	0.733769	1.04654
0.915757	0.685801	1.13502	1.44605	0.822506	1.17165
2.20435	1.75859	2.16701	1.4512	4.33968	1.64218
1.08091	1.61662	2.94872	2.59289	5.67718	0.983662
1.02535	1.30174	2.08874	1.1832	1.00059	1.23182
0.527708	0.821989	1.12995	0.957095	1.11407	0.762378
0.428499	1.33735	1.95646	0.744332	0.793926	0.548636
0.929079	1.77008	1.34148	1.48738	2.20336	0.426066
0.638347	1.6639	3.7766	2.78925	0.655406	0.971537
2.11113	0.992336	1.79404	0.553834	0.844854	0.612382
0.585409	1.49715	1.07444	0.754515	1.15372	3.0083
1.90279	1.41106	3.03953	2.46067	0.392404	0.397793
1.42524	2.18386	1.83125	2.11264	0.650508	0.830378
0.725742	1.82069	1.9231	0.517942	0.342247	0.320516
4.28485	0.950731	0.979096	0.735107	1.7566	0.31978
2.27748	1.50538	1.60328	1.30525	6.07683	0.491627
1.7306	0.751945	0.708898	1.11612	0.596192	1.09364
0.707958	1.14501	2.63792	0.927531	0.576259	0.268115
1.14994	1.33468	1.67878	0.581115	0.992885	0.722873
2.27871	0.766104	2.31018	1.24301	1.61584	0.827576
0.942585	1.10963	0.767054	2.40576	2.10531	0.594362
0.898658	0.663825	2.56054	0.571668	2.25879	0.731268
0.294149	1.04795	1.61267	2.32045	5.88144	1.20363
1.59753	1.06416	2.22883	1.12121	0.296928	0.133214
0.436048	0.617553	1.36793	2.89756	0.640858	0.275747
2.39571	1.26504	1.02523	1.15297	6.5427	2.31949
1.29088	0.54908	4.61367	0.728253	0.465013	0.370839
2.2619	1.38578	1.97104	0.707639	0.847344	1.55351
0.373419	0.763354	1.64595	0.815836	2.29354	0.598403
0.366155	0.703555	3.20386	0.504005	0.712957	0.572598
1.45446	1.70687	1.36322	1.18864	1.05391	0.171921
1.23747	1.42165	1.64595	0.62392	1.3271	0.640393
0.768471	1.66496	1.19729	0.906486	0.41206	1.01632
0.882972	1.09086	1.27137	0.684173	1.87208	0.589916
1.38429	1.5706	1.04167	0.412472	2.2409	2.0473
2.25868	1.11351	1.33314	0.812217	1.59686	0.545267
0.89459	1.65735	1.38031	0.323381	2.69017	0.372552
1.83446	1.534	2.40964	0.776182	0.931103	0.256107
3.82449	1.83181	3.57896	0.811704	2.43364	0.72656
0.811902	1.25832	0.841401	1.27326	0.921383	1.66358
1.09945	1.12767	1.76065	6.57853	1.38258	1.74841
0.879409	1.09694	1.33186	0.921182	0.56862	0.494304
0.726772	1.14826	3.08357	1.22763	1.32377	4.54208
1.83807	1.02477	1.16818	1.44739	1.32765	0.657904
0.889899	1.87865	1.69516	0.586808	1.1284	0.523293
1.28614	1.01004	1.62386	0.813537	0.393049	1.51589
2.37608	0.69056	1.50763	1.17832	2.44268	0.291319
1.59528	0.660568	1.05104	1.79881	2.41209	0.702458
1.98566	0.824466	0.672168	1.55479	1.25974	1.67956
0.67201	1.38209	1.85146	0.650067	0.563561	0.315174
0.5764	1.42288	0.701117	1.05306	0.399774	1.21162
1.20174	1.03484	3.12954	0.801561	0.786252	2.50966
1.69637	1.34182	1.51635	1.35312	0.445934	2.15296
1.77375	0.65661	1.49757	0.496821	0.628209	0.465245
2.69374	0.830895	1.05816	0.477722	6.10266	0.44776
1.28649	1.07665	1.54808	0.691684	1.10577	0.209849
1.81089	1.39922	1.55391	1.64341	1.9869	0.442385
0.867412	1.14654	0.872737	0.621659	0.569656	0.751263
1.03507	0.864892	2.77452	1.74673	0.538934	1.60485
0.942305	1.65915	1.50811	0.327777	0.951148	2.82889
0.703415	0.792587	1.56226	0.951322	1.2443	0.689481
3.17481	0.468138	2.0274	0.435936	2.92615	0.89163
0.762491	0.942056	1.11399	1.01842	0.409089	0.860838
2.58055	0.542315	3.56665	1.15461	1.29828	0.921012
1.58019	0.760288	0.565787	1.09488	1.38816	0.825133
1.28529	0.790673	0.871866	0.526359	2.00745	1.11332
2.00203	0.796669	0.743669	0.960538	0.279319	0.721927
1.16311	1.41366	1.49236	0.969331	6.07255	1.48148
0.951359	0.733886	1.131	1.8352	0.471838	3.98946
0.670177	1.10595	1.5697	0.527218	0.229926	0.678546
1.65761	1.08251	0.854766	0.56827	1.28164	0.412239
0.760093	1.34268	0.84981	1.7247	0.274723	6.35844
0.866613	2.28854	1.01789	0.425742	1.83885	0.348454
2.14996	0.768003	0.739387	0.611741	0.925466	0.838659
2.49316	0.831783	0.626947	0.655272	1.90879	0.099642
0.712292	1.09001	2.36297	0.460118	1.17499	0.684676
0.901624	1.151	0.828772	0.809719	1.27282	0.436132
0.955699	0.397378	0.892329	0.592834	0.68664	1.30867
0.970594	0.671417	1.88955	0.595581	0.856008	1.96486
0.608212	0.859906	1.30497	0.628618	0.24803	2.06056
0.667634	0.898595	3.03647	0.65207	1.08521	1.23481
2.36913	0.757782	1.09224	0.881252	1.32032	1.32831
0.90799	0.515762	1.49282	2.05846	0.516961	0.636888
4.3651	1.0126	0.616382	1.00689	0.723817	0.422377
0.863962	1.55083	1.41924	0.902169	1.49447	0.489599
0.819318	0.936292	0.457758	0.860025	5.40285	0.966483
0.864955	1.14085	2.82393	1.07383	1.69447	0.222185
0.412626	0.523168	1.28381	2.30336	0.668789	0.250825
1.96168	1.07579	0.336524	0.610245	0.900091	0.224291
4.1806	0.527516	0.429694	1.0063	1.43131	0.620223
1.03971	1.1901	0.556289	0.952507	3.87507	1.86641
0.600581	0.594501	0.870563	1.41988	1.09636	0.508119
2.23171	0.883378	0.684482	0.922116	1.48804	0.70761
1.0639	0.663585	1.78201	1.11709	4.40528	1.26663
0.577522	1.2874	2.08267	0.989356	1.72607	0.769659
0.730283	0.980111	0.408243	0.778001	0.567654	0.729488
1.03511	0.595265	1.046	0.837718	0.525816	1.38431
2.16015	0.771272	1.58685	0.790025	1.29944	3.58874
1.20617	1.67579	0.904335	0.920608	2.37857	2.46568
1.3756	0.639656	1.44364	2.00033	5.29294	1.54291
2.0693	0.527939	2.47836	0.750528	0.361209	1.02286
2.01544	2.20512	1.6389	0.947411	1.03372	0.523049
1.13536	1.17489	0.97466	0.366375	0.493961	0.476315
0.529763	1.1403	0.381438	0.420608	0.715214	0.587824
0.981819	0.431451	0.793033	0.595542	0.73833	2.907
0.630882	0.721608	1.37054	1.14378	0.473162	0.981498
0.765937	2.08162	1.17734	4.19695	0.568312	0.441431
2.39959	0.362631	0.920636	0.786625	0.907995
0.654571	0.998594	1.17159	1.0793	1.28112
1.56828	1.25072	0.746883	3.67615	2.7718	0.856597
0.756843	0.470288	2.04655	2.75345	0.88042	1.9537
1.55392	1.15094	0.904271	1.47921	1.12783	1.81473
1.24534	1.72825	0.623379	1.29888	3.12542	1.63547
2.30727	1.53528	1.10177	0.607816	0.93699	1.57162
0.616015	0.817581	1.08151	0.853198	0.699895	0.773525
0.708425	0.41235	0.470116	0.394702	0.629341	1.79608
1.01418	0.571591	0.917898	0.686291	0.985066	0.82686
3.18706	0.619329	1.55459	1.60196	2.96693	1.07416
0.643324	0.701443	1.79184	1.39779	1.38395	0.863035
4.65048	0.444638	1.1004	0.88815	0.836877	2.48937
0.413	0.884821	1.29475	1.82746	1.58766	0.457021
0.480631	0.361056	0.752366	0.325945	1.01446	1.15723
1.37685	3.00892	0.669786	1.5523	0.248275	1.41821
0.595443	0.719248	2.03767	0.781023	0.736244	1.40567
1.45565	0.641301	1.13648	1.1407	2.11075	0.96615
1.32097	1.49669	2.17001	0.990709	0.570618	0.468793
1.90934	1.32906	1.00582	3.32823	1.15579	0.588084
1.90973	0.995536	1.59901	0.457465	0.664498	1.89382
1.42807	0.536637	1.73393	0.68492	0.749847	0.636328
0.645058	0.789793	1.0687	7.85877	0.408445	1.61354
0.391852	0.94449	0.467691	1.18765	0.473235	3.36749
0.816162	0.734759	0.606544	0.808296	2.19874	0.953598
0.613569	0.684717	1.46871	0.796161	1.89525	0.421935
1.99639	1.02062	1.24341	0.684421	1.15451	1.0733
0.489389	0.903778	0.579224	0.574455	3.08561	1.65615
0.936201	0.608694	1.322	2.41876	0.393705	1.23858
1.18173	1.69935	0.618608	0.773006	0.789632	1.63164
0.730442	1.67119	1.44915	0.823077	0.4029	0.612374
0.781302	0.384807	1.56845	0.447749	0.552907	1.04296
1.54329	0.521277	1.14793	0.709101	0.584442	0.965041
1.80503	1.77867	0.253714	0.519735	0.950907	2.45317
1.29497	0.959218	1.02868	0.804972	0.923168	1.49223
2.03701	0.77355	0.539455	1.15813	0.792109	1.46109
1.59985	1.51113	0.838506	1.35054	2.16271	1.23372
0.883813	0.226556	0.932756	1.55829	1.47936	1.46652
3.0532	0.671987	3.29086	0.858264	0.702374	1.06578
0.695366	0.627599	4.27093	2.62057	0.533773	1.23131
1.05205	0.444584	0.317067	1.38647	0.676352	1.32578
1.38357	1.17581	0.713306	0.680715	0.646427	1.64172
0.431321	0.60822	1.05463	0.621173	1.17382	2.69342
2.09193	3.00643	0.686405	0.970262	1.62231	1.90675
2.82552	0.389415	0.420906	0.583633	2.40687	1.88324
0.655238	0.902737	1.04879	2.01182	0.572043	1.57034
0.703714	0.596144	0.773111	1.19613	1.60573	1.70173
1.14179	0.467647	0.641313	0.741502	0.80745	0.982413
0.830603	1.38778	0.869334	0.755429	0.416034	1.08676
0.964361	1.02082	0.56904	0.898554	0.545485	1.07725
1.09817	0.908668	2.56257	0.845357	1.58763	0.985379
1.43969	1.23169	1.45249	0.621533	1.19439	1.86128
1.35098	1.02825	0.643317	0.909347	1.27789	1.00911
0.617035	1.29817	0.619272	1.22213	4.1758	0.829518
1.52411	0.365552	0.961106	0.940818	0.413291	0.236387
0.516675	1.62969	1.38635	1.06949	1.3659	1.21559
0.881648	0.78039	2.44952	1.66006	1.15072	0.843729
1.24498	0.705077	0.569755	1.30277	1.54953	0.802032
1.25113	0.881076	1.03822	2.25698	1.01124	1.43919
0.944937	1.61328	0.658459	0.855456	0.620657	0.975384
0.987981	0.920503	0.846997	0.482188	1.32288	0.826845
0.841615	1.50738	1.25015	0.489993	0.918279	2.90895
1.09598	0.344423	1.43051	0.548602	0.297182	0.630305
1.17867	0.826891	0.49285	0.398097	1.29952	1.77727
0.597982	1.26665	1.76263	1.05957	2.2325	2.23235
0.978315	0.377767	4.11073	1.14175	0.810732	1.18489
0.565633	1.1245	0.748087	1.06437	0.976892	2.59853
0.541647	0.873018	0.665685	1.22309	0.201427	0.85046
0.596256	0.413436	0.234396	1.32432	1.08795	0.730214
2.03179	1.15094	0.465044	0.582907	1.12045	1.45744
1.24747	1.23417	1.82469	0.782182	1.4695	0.915712
0.837938	1.05086	1.52329	1.62145	1.57368	1.70627
0.566931	0.697566	0.780113	0.820431	1.02481	0.884641
2.00511	0.996418	0.27012	1.30715	0.380946	0.83111
0.555198	1.43683	0.424367	1.32124	1.64703	0.69512
1.8513	2.1963	1.12011	0.420167	0.728505	0.920773
1.78404	0.680674	0.667198	0.569867	0.533051	1.02129
1.09211	0.655869	1.34226	1.50904	0.817848	0.760285
1.13165	0.903793	0.677264	1.67179	0.618476	0.906598
0.65821	0.856022	0.843771	0.885114	1.44934	1.1621
0.80968	0.548608	1.0898	1.03472	0.811127	0.693122
0.795891	0.726194	1.67298	1.80637	0.649538	1.03532
1.31554	2.11971	0.807623	0.745766	0.551723	0.287316
0.445686	1.20872	3.03606	3.11692	1.42884	0.587465
0.95644	0.935517	1.77189	0.845598	0.980691	1.34779
0.970074	1.04701	0.520063	0.724665	1.58632	0.902695
1.6426	0.544248	1.81911	0.537561	0.181806	0.622619
5.61616	0.819621	2.05482	0.838552	2.29952	1.5138
0.934011	1.03382	2.27492	1.09563	1.52693	0.716399
1.6074	1.62037	1.14848	1.00167	0.911055	0.831609
0.901114	0.464436	1.4867	0.882891	2.56519	1.35866
1.65732	0.604647	0.790277	0.96965	0.906837	0.826922
0.706429	0.985456	1.33476	1.44212	1.10349	0.680019
1.34495	1.02888	1.51943	1.12247	0.83249	1.28953
0.784782	0.213527	2.56706	0.75664	1.20154	0.883757
0.836744	0.978933	0.733649	1.03885	1.5641	1.17273
1.13242	1.21277	0.472176	0.558242	0.502462	1.09919
1.30499	0.443465	1.02872	1.28759	0.684573	0.970669
0.994312	1.20769	0.337887	0.96172	1.36371	1.29646
3.48476	1.11959	0.912703	1.21792	0.717737	0.903071
1.52721	1.47211	1.02059	1.0875	2.10774	1.29559
0.743286	0.639993	0.629391	0.773207	0.438865	2.69667
1.80976	0.530382	1.4161	1.40304	0.829655	1.76751
0.894632	0.677645	1.21043	1.20345	1.5836	1.02874
0.748968	0.857576	2.9901	0.442164	0.564529	0.658383
1.15994	0.754761	1.52548	1.06158	2.67043	1.88922
1.00602	0.629768	1.025	1.02534	0.931691	1.58785
2.99632	1.22818	0.561	0.572532	0.510784	1.37772
0.936877	0.867272	0.298823	0.602148	0.623397	1.09938
1.07214	1.00244	2.16962	0.685073	2.13134	0.403804
0.827116	0.663319	1.46976	1.62738	1.06176	2.33763
1.01585	1.74477	0.600271	2.56188	0.478316	2.65425
2.32436	0.528319	0.703641	0.998586	0.683136	0.936273
0.642395	0.590456	0.935391	1.2068	4.17671	0.906628
1.0648	1.39227	0.465289	0.781559	0.492956	2.30727
0.763136	1.999	0.526654	0.640521	0.921766	0.959254
1.38182	0.650881	0.552784	0.749412	1.35869	0.612015
1.69572	0.584984	1.22715	1.69774	1.63324	2.46669
3.67037	1.29537	0.60975	1.19029	0.506037	0.652286
0.843522	0.88503	0.183837	0.832235	1.63501	1.06692
0.675428	0.693723	1.04386	2.69394	0.706723	1.3232
1.55359	0.810379	0.285047	1.38456	0.871059	0.812722
2.08019	1.09172	1.2127	0.811415	0.829702	2.54333
1.02909	2.13693	0.973537	0.561183	0.676858	0.963711
0.621754	0.242558	0.526791	1.22649	0.676558	0.886182
0.441497	0.817624	0.343309	1.07431	0.670749	1.10645
1.22296	0.850601	0.414298	0.766589	1.45417	1.96386
1.44507	1.38481	0.479542	0.965046	0.817405	0.55631
1.23932	1.19559	1.07523	0.614939	1.28769	1.13058
0.905719	0.922862	0.764043	0.94419	2.28331	1.31428
0.716678	0.560774	0.586307	1.21297	0.964553	2.28577
0.764849	0.68859	0.535171	0.622504	1.50394	0.665825
0.880272	0.536299	0.417686	0.878407	0.595413	0.308819
0.853142	0.807122	0.36853	0.967903	0.504968	0.986776
0.543665	1.16944	0.86926	0.367941	0.736093	1.2498
1.23672	2.11969	0.552597	0.70941	0.497037	0.476125
1.10309	0.714305	1.78287	1.2193	0.404422	0.603272
0.90241	0.526026	1.09879	0.373938	2.65656	1.26256
1.15782	0.966443	0.703107	1.22491	1.3667	1.52829
0.689269	0.929827	0.998371	0.982145	0.631756	1.07976
2.79697	0.641594	1.3446	1.68302	3.65619	1.26101
0.611753	1.07314	0.707151	0.49642	3.21764	2.32104
0.500909	1.30662	1.31765	1.85907	0.678967	1.09956
1.08232	1.21319	1.81675	0.728093	1.01531	1.19792
0.413342	0.716785	0.289054	1.95495	0.812867	0.645056
1.4913	0.484617	0.890433	1.31555	1.10578	0.53715
0.862464	1.10646	0.670653	0.732684	0.646221	0.955971
1.0386	0.755657	1.61797	0.443802	1.8854	1.94824
1.09562	1.01568	0.472186	0.639047	0.974821	1.20558
1.37304	1.3009	0.640252	2.72075	1.55035	1.19805
2.82245	1.14864	0.25728	0.546562	1.15974	1.1918
1.54599	0.594989	0.900234	2.03749	1.11008	0.753393
0.225663	1.3231	1.67597	0.859998	1.58211	2.84715
0.505738	1.186	1.11783	2.13017	0.688703	0.820677
0.77766	0.816639	1.92723	0.638642	0.634428	2.23199
1.1281	0.622982	0.451125	1.01728	1.32304	1.13265
1.96152	0.718856	0.602052	1.29202	0.453999	0.85743
0.333805	0.674061	0.835656	1.05371	1.4827	0.499152
1.14065	1.70166	0.53128	0.994264	0.792714	4.71694
0.720319	0.996783	0.911236	1.83082	1.22826	1.64885
3.35073	0.981976	0.603593	1.27845	1.9218	0.500894
0.833505	1.17666	1.04266	1.00163	2.65377	0.331455
1.44638	1.08698	1.50971	0.890842	1.29414	1.18354
0.535041	0.859548	0.762044	1.95895	1.34481	0.174634
0.665447	0.434061	1.18759	1.00619	1.284	1.50948
1.08054	1.34905	2.99472	1.89706	1.44946	0.462911
0.669547	1.25791	0.489535	1.23083	0.595351	0.46954
2.53281	0.755881	0.998887	1.75803	0.526566	2.8609
0.681522	0.924273	1.28615	1.66175	1.55771	1.98424
0.973713	0.506159	0.571327	0.830264	0.718705	1.34241
3.05273	1.11781	0.736636	1.51907	1.23728	0.552241
0.935221	0.726368	1.3923	0.863684	0.864151	1.38075
1.06342	0.573658	1.78798	2.04976	0.772652	1.04016
0.405547	1.01308	0.434132	0.853853	0.672043	1.84419
0.763757	0.972073	2.8133	1.12156	0.435223	0.543338
1.22895	2.46314	0.801758	0.672442	1.15203	1.41235
2.34287	0.990721	1.30209	0.436801	2.2341	1.90051
1.11047	1.44013	0.363745	0.658554	0.969891	1.15933
0.602722	0.920817	1.35312	1.07447	3.09364	0.478799
1.07186	0.732049	1.68005	1.83109	0.359711	1.76875
0.83285	1.43509	1.29305	1.03063	1.10942	1.49702
1.71856	0.822375	0.453317	1.5181	0.702199	1.81173
0.578028	0.755723	0.749976	0.67325	0.464348	1.87834
0.415084	1.23183	0.564247	0.817866	0.62577	1.26045
0.364347	1.29669	1.10743	0.515206	1.58545	9.19616
0.626771	0.564859	0.19694	0.795996	0.512484	0.660825
0.61541	0.728595	0.436426	1.34798	1.10969	1.69341
1.19288	1.5954	2.34521	0.497033	0.727249	0.349227
0.845317	1.16064	0.885858	0.310462	2.09353	1.84735
0.470199	0.883064	0.779702	0.767733	0.832332	1.94278
1.47052	0.749413	2.17849	1.33304	0.544737	3.53995
0.39828	0.755054	0.693804	1.21942	1.01212	2.43136
0.711413	0.911556	1.32045	1.45337	0.507107	2.42047
0.722073	1.27998	0.689455	0.627945	1.06073	2.52823
0.470673	1.50722	1.4748	0.837691	0.900795	0.906821
0.333631	1.29457	0.464479	1.36988	0.530238	1.83675
1.3805	1.33581	0.829268	0.681124	1.70054	1.07802
0.733715	0.600838	1.26576	1.68662	1.18708	1.36178
0.605683	0.930829	0.849202	1.33092	0.603508	1.95162
1.53583	0.67936	0.894456	0.782094	1.85412	0.963639
0.617554	0.315332	0.398499	1.86689	1.65383	0.586604
0.807485	0.543368	0.488919	0.885196	1.25042	2.50866
0.936799	0.881876	0.291791	1.15394	0.819846	2.37613
0.814449	0.617794	0.532386	0.777698	0.461022	0.970864
0.32193	0.742875	0.349316	0.442085	0.428098	2.17076
0.466502	0.889478	0.660742	0.698141	1.27237	1.83216
1.05513	0.843587	3.07306	1.20899	1.42923	1.76288
0.943184	1.44645	0.270004	1.16235	1.158	1.19949
0.452956	1.17376	1.10537	1.28575	0.932779	1.13726
0.8279	1.52884	1.19894	0.80908	1.56822	1.29333
0.525699	1.20416	0.888381	0.963729	0.827159	1.3538
0.882886	0.96595	0.340594	0.58829	1.04082	1.52905
0.443892	0.453579	0.997268	0.619944	0.970373	1.03192
0.713543	0.896694	2.0629	0.391361	0.83813	3.06625
0.302157	1.01099	0.35575	0.576534	0.880132	1.78352
1.7047	0.754144	1.09924	1.00179	0.701431	1.95436
1.06589	1.35302	1.38225	0.513005	0.876211	5.84287
2.85216	0.663207	1.49052	0.719092	0.734556	2.82145
0.448029	0.60157	0.739235	0.684692	1.74318	4.19247
0.945552	0.841916	1.32581	0.883093	0.304528	1.78386
3.53543	1.14897	0.856781	1.55131	1.07283	0.811755
1.25328	1.28846	0.849107	1.61827	0.661972	0.437803
0.380253	0.908018	1.23635	1.22005	0.812206	0.450662
0.322876	0.340529	0.381978	0.439812	0.965906	2.33192
0.76384	0.830626	1.82123	0.906317	0.486213	2.28591
1.75077	1.1899	0.549373	0.733614	1.39098	4.69489
1.02384	0.806102	1.78383	1.34593	1.30938	0.355037
2.8154	1.27759	0.469606	0.57114	2.54483	5.6034
2.74784	0.770198	1.6995	1.71568	0.955727	0.757672
4.1663	1.18066	0.47549	0.734682	0.629943	3.10934
0.668496	1.73005	0.664114	3.25373	1.20717	1.04993
0.390873	1.02076	1.02627	2.83735	0.934987	0.781853
1.40356	0.408136	0.409013	0.979728	3.0283	1.14515
0.49255	2.19868	0.626823	0.73881	0.875459	4.67783
1.56641	1.1907	0.692885	1.28232	1.15041	2.49935
0.832193	1.05453	0.849173	1.5243	0.566252	1.10324
0.780759	0.86405	1.37176	0.856216	1.2954	1.1556
0.616489	0.803734	0.677566	1.33145	0.99413	0.604453
0.757462	0.808657	1.51143	1.09832	1.08787	0.978996
0.775327	1.04046	1.24771	0.693027	0.932575	0.90419
3.5896	0.887204	3.92554	1.2149	0.497969	5.04138
2.32585	0.939648	0.838027	0.860073	0.864059	0.938417
0.698845	0.724322	0.868549	1.12377	0.611131	2.40033
2.96315	0.529772	1.68802	0.910254	0.704115	0.914163
0.663385	0.598834	1.46642	2.7039	0.807501	3.18315
0.666251	1.2638	0.459428	0.843869	1.04285	2.95716
0.241719	1.03349	0.751235	0.37626	0.94614	2.34949
0.433919	0.409264	1.52214	1.49098	0.686521	1.75572
1.75328	1.30527	1.68115	1.01242	0.801703	2.47497
1.35671	0.890389	1.10833	0.872821	0.603021	1.57397
0.511626	1.63883	0.758779	1.59398	0.51729	1.73265
0.844703	0.75	0.691309	2.21766	0.828329	2.11579
1.37003	1.80345	1.26245	0.640713	1.35928	1.29037
1.02328	1.05443	0.564985	1.19835	0.812753	0.12007
0.853468	1.1317	1.83544	2.12419	2.14277	6.31008
2.624	0.588265	0.387904	0.670583	0.831766	0.445299
0.292502	0.785707	0.729821	0.810219		1.37922
2.1566	0.77863	0.476352	0.759933		1.28689
1.28582	1.18555	0.66921	2.13346	1.11054	0.641835
0.593613	1.38691	0.279268	1.255	0.586882	0.65828
0.998133	1.14052	1.41213	0.995032	1.35104	2.19267
1.88316	2.01446	1.77299	1.22897	0.722158	0.64285
0.957977	0.636952	1.90648	0.913598	0.528039	4.22743
1.45512	1.18985	0.953143	1.54212	0.530847	2.13144
1.86739	1.22523	1.38873	0.780048	2.59881	1.83635
2.47249	2.94123	1.57936	1.33386	2.66903	0.870441
1.92704	0.744024	1.63222	1.23724	1.85785	0.791877
2.35394	1.05823	0.55858	1.90142	1.41396	0.769274
0.680609	1.69384	0.862278	2.73191	0.336308	0.98429
0.856811	0.762076	0.969771	0.757593	0.557567	1.69312
0.709731	1.33935	0.622567	1.00019	1.0139	4.32225
0.560832	0.863043	1.34577	1.06223	0.679506	0.65291
0.543549	0.793447	0.294676	1.0026	1.31687	4.36892
1.17155	0.895261	0.297464	1.54308	0.400692	1.52419
1.33352	1.16198	1.43181	1.36065	0.89284	1.18944
0.969506	0.87006	0.686159	0.516669	1.06765	2.99429
1.854	1.06454	0.631717	1.93101	1.12498	1.75851
3.49956	1.26665	0.545759	0.534987	1.61559	1.15215
1.92077	0.644553	0.541156	1.32301	1.42088	0.545621
1.46792	0.678045	2.45181	1.68567	0.826959	1.7992
0.908763	0.798821	0.831405	1.35728	0.732503	1.36972
1.57405	0.864494	0.200888	0.794911	1.85659	1.97039
0.723098	0.807848	1.34427	0.989181	1.30381	0.793898
1.03742	1.0614	1.51338	1.15958	1.23534	1.38062
1.03668	0.907217	0.389545	1.43335	0.809468	1.69419
2.01258	1.14883	0.809218	1.2824	0.557334	0.714064
0.880485	1.0206	0.459839	2.30724	0.72047	0.902349
0.783153	1.77071	2.09072	1.21885	1.08262	1.2646
0.697184	0.770486	0.569698	0.595329	2.33744	1.05478
1.03101	0.545787	0.971017	1.64423	1.07242	0.611095
1.30495	1.25943	0.33376	0.756545	0.65964	4.41556
0.687745	0.63185	1.49853	0.879954	2.20964	1.31391
0.859049	0.628786	1.39792	1.24366	1.22549	0.879254
1.38484	0.807185	1.38765	0.99457	1.10807	0.934127
1.86361	0.715012	1.53738	1.13974	1.38596	0.439322
3.66866	1.96506	0.511601	0.906883	0.826504	0.729874
0.435375	1.21636	1.30719	2.17774	0.99815	0.753557
0.983374	0.499149	0.567159	1.9062	0.684502	0.702963
3.05332	1.76915	1.74969	2.1138	0.912051	0.893753
2.44279	1.03588	1.1249	1.4597	0.650757	1.05115
1.03848	0.850362	0.374069	1.76228	1.47587	2.25758
0.770611	1.28206	1.73986	2.50094	1.95954	1.83004
0.799873	0.797252	0.749451	0.656672	1.19672	8.22832
0.507814	0.657597	1.1282	0.695456	2.96588	1.02959
2.44563	0.709584	0.325652	1.15038	1.20174	1.71859
1.91249	0.356183	1.28189	0.54609	0.710533	1.47281
3.35876	0.705083	0.273124	1.65415	2.1465	1.37811
2.14114	0.355023	0.708198	1.54532	0.804743	1.97471
0.904577	0.412926	0.876219	1.13809	0.943339	2.87465
1.52755	0.777038	0.243422	1.21749	2.34858	3.42543
1.55894	0.942218	0.815362	0.88498	1.20165	0.808992
0.857585	1.29712	0.470945	0.974636	0.64314	3.45723
0.793552	0.996588	1.36962	1.46788	0.63053	1.48167
0.796955	0.877521	0.501409	0.823372	1.14225	0.702228
0.823641	1.52392	1.27028	1.57309	0.546157	1.2889
0.693972	0.706016	0.437338	0.647824	1.59133	1.2555
1.93286	1.22761	0.928219	1.01392	0.87292	1.08711
3.11316	1.385	0.559391	1.13352	0.74872	0.709504
0.553264	1.07114	0.871831	5.52497	2.02154	1.00938
1.82883	0.958651	0.750614	1.22185	0.999957	0.551623
0.713118	0.971398	1.39325	0.652193	1.46402	1.28917
0.73369	0.585845	2.41592	1.50252	2.86626	1.81452
1.49477	1.48696	1.64175	0.715751	0.997726	0.873637
0.660815	0.73471	0.38718	1.29245	1.18118	6.26251
0.844169	1.18409	1.43923	2.10989	1.7243	1.45939
2.12593	0.542772	0.604815	1.25224	1.17162	1.38451
0.932862	0.544432	2.43928	2.11131	0.145654	1.31402
1.68588	2.30859	1.013	1.40737	2.04614	1.10373
1.81607	1.46939	1.15206	1.63377	0.900193	2.98562
1.12847	0.961821	0.648891	0.631167	1.19248	8.00647
0.827503	1.18422	1.41745	0.768191	1.38655	1.80024
0.820893	0.827077	1.20984	1.63458	7.2792	1.27524
1.07869	0.860735	0.883148	0.950372	4.81725	1.48168
0.81031	1.53084	0.521442	0.918009	2.39007	0.995938
1.68882	1.23892	2.52209	1.37879	1.10756	1.89941
1.61739	0.80442	1.27954	0.434503	1.58991	2.15132
1.56458	2.29743	0.599493	1.09061	1.91571	2.94158
1.46462	0.992393	0.639626	1.47616	0.269147	1.90355
1.67982	0.34113	1.18368	1.95396	2.0771	0.796955
1.03026	0.955199	1.29278	0.799161	1.25727	1.5937
0.627383	0.970142	1.73056	0.881814	1.54432	1.05124
1.87731	1.08056	0.780058	0.857151	1.41433	0.588533
1.90045	0.570449	1.06129	0.562913	2.68559	2.59013
3.09831	0.658314	0.574133	0.513671	2.48808	5.49579
1.05518	0.579948	0.768825	0.652487	1.51218	0.642993
0.918223	0.64467	0.519832	0.770267	1.98481	1.31043
1.4517	0.810596	1.18646	3.80748	1.15969	5.58048
3.32085	0.688735	1.63019	2.29976	1.17141	0.721069
1.01738	0.914584	0.694869	0.774295	0.867582	1.20666
1.24622	0.837041	1.00854	0.41409	0.66426	1.26038
1.69381	0.839131	1.14391	0.885013	1.46844	0.361715
0.921344	1.3459	0.583536	0.911704	2.06396	3.77887
0.293222	0.397262	0.704558	1.27951	0.513896	1.31559
1.139	0.490425	0.536106	1.22149	0.479935	0.89603
1.88907	0.503794	0.707977	0.816263	1.39751	3.44794
2.25966	0.913255	0.637505	1.56832	1.4435	4.02758
1.07053	0.662114	0.968627	1.0146	0.853588	0.818264
0.615313	0.930124	0.653415	2.71255	1.24557	3.34964
0.728373	0.597165	2.9569	1.69915	1.99639	1.83671
1.08748	1.6552	1.77678	1.12095	1.79561	3.8133
1.8305	0.727951	0.999367	0.737142	2.35123	1.82124
1.47002	0.899046	0.223544	0.981581	0.832886	0.975902
2.72306	1.17754	2.53289	1.32294	1.16866	0.357175
0.920882	0.793711	1.35094	0.319341	1.22269	0.624454
1.51463	0.854647	1.32325	1.18145	0.455276	1.94552
1.08917	0.71005	1.39581	0.795015	1.65424	1.17614
2.14662	1.38363	0.277253	0.485275	0.593667	0.664234
0.966197	1.14683	0.793406	0.663678	1.04808	2.47241
1.65348	0.47149	0.463028	0.803397	0.78776	0.580458
2.53019	0.865746	1.21359	0.43712	2.79963	1.03408
1.55168	1.29689	1.54602	0.869886	2.81506	2.24771
2.12391	1.27033	1.46054	2.35079	0.186367	1.3566
1.69956	0.714125	1.08423	0.930623	1.04947	0.930202
1.91402	0.411487	1.97231	1.31703	0.704788	2.11275
0.680233	0.882706	1.04074	0.513379	0.963054	2.11637
0.923885	1.38417	1.41685	0.690763	0.402717	0.996881
1.41397	0.796745	2.6381	2.77114	1.20885	0.682656
1.33971	1.10322	0.488455	0.770311	0.937149	1.28412
1.60507	0.876073	1.63827	0.568226	1.94091	1.12523
0.597695	0.796507	1.46541	2.19357	0.737221	2.08005
1.35876	1.01247	1.19039	1.41215	6.19978	0.741208
0.817088	0.9223	2.02359	1.80583	2.47093	0.611611
0.673712	0.597618	0.340798	0.829018	1.1142	0.844301
1.21474	0.528749	1.9536	0.860885	0.677752	1.54422
1.80798	0.461231	1.5341	0.637444	1.65708	0.538232
1.02122	0.592998	1.46367	1.58725	0.882322	0.779252
0.929506	1.55713	0.546797	0.82347	1.71272	2.01467
0.622148	0.891758	1.43727	0.751562	2.18618	1.21653
1.19631	0.827293	1.01211	0.861794	1.15177	1.95188
1.71548	0.805903	1.3573	0.589385	0.46203	1.36516
1.04045	1.18376	0.931326	0.992377	1.26231	0.743528
1.65464	0.662288	0.848346	1.82643	0.318297	0.875352
1.47614	0.849149	2.967	0.907356	1.35347	0.844334
0.863878	1.19785	2.17077	1.95295	4.48446	1.19767
1.46042	0.947738	0.781193	0.262828	1.76927	2.47886
2.34437	1.5443	0.790256	1.17393	1.96302	0.850093
0.900845	0.971102	2.28589	1.16557	2.79401	4.09345
1.00054	0.595961	2.26783	0.75208	0.65364	0.663401
1.5848	0.469645	0.589514	3.81303	1.60816	0.352046
1.90146	1.89687	0.526647	0.596899	0.933646	1.49448
0.351451	0.884242	2.46415	1.03169	2.15833	0.468373
1.76943	0.785676	0.451499	1.16361	1.61032	0.627338
0.877021	0.822787	0.904447	0.812262	1.18263	0.520516
0.665861	0.791758	0.397444	0.840098	1.02411	1.38977
1.78949	0.776393	0.987734	0.407615	1.09104	1.08557
1.03207	0.543525	1.30691	0.867594	2.14188	0.840615
1.03632	0.777347	1.47128	0.999173	1.85603	1.55374
1.35684	0.931929	0.635413	0.659582	1.31006	0.974162
0.933394	0.854164	1.37119	0.657939	1.08654	1.6259
1.42977	0.582074	4.31328	0.37425	2.3308	0.497859
1.53839	0.654866	1.2787	1.32531	0.383863	1.20505
1.14387	0.939167	0.890998	1.02164	0.337842	1.76028
1.7858	0.794295	0.278558	1.5439	0.591861	1.44353
0.863508	1.48747	4.22275	0.777835	0.585886	1.15416
0.803855	0.580025	1.84158	1.14402	0.272191	1.2247
1.11276	0.567908	1.61313	0.749739	1.64352	2.04911
1.04998	0.820645	2.11801	1.4092	1.20794	1.25649
0.39356	0.425164	0.868608	1.35896	0.990667	0.237626
1.71075	0.622565	0.347174	1.1908	1.82136	1.29532
2.10602	0.801586	2.16256	0.544751	2.816	1.38194
0.928869	0.522503	0.936579	1.03911	1.62137	0.145241
2.16059	1.0015	2.417	0.967163	1.55362	1.20565
1.544	0.545308	1.24536	1.65959	0.380476	3.47844
0.867384	0.710459	0.810748	1.5475	0.961726	1.33061
1.23793	1.62535	0.834639	1.08086	0.785942	1.27973
1.69041	1.01284	1.86441	0.834432	1.4323	0.811053
1.05055	0.740002	3.23095	0.664524	1.02182	2.32562
0.856083	1.18393	1.05409	0.87222	2.22958	0.876971
2.39501	0.990786	0.807406	0.380796	0.468775	0.934003
0.844012	0.896529	0.928669	1.40866	0.88718	1.25459
1.43546	1.05659	0.301364	0.752382	0.946709	0.548641
0.921968	1.48467	1.32703	1.04689	0.592761	0.820864
0.882537	0.860266	0.578888	1.71447	1.44401	1.38037
1.21164	1.1405	1.82002	0.768319	1.02728	1.33791
1.13632	2.30484	1.44484	0.917839	0.953856	2.01564
1.04787	0.781132	0.89213	0.549564	3.12706	1.04482
1.12077	0.747242	0.505106	0.691248	0.885638	0.724484
0.9782	1.84084	1.79639	0.542869	1.09071	0.318618
0.811063	1.1173	1.0661	0.871868	0.49921	1.41901
2.4687	0.993027	0.567449	1.09948	0.807067	1.72388
1.25677	0.696496	1.88982	1.03137	2.08364	1.03965
1.38876	0.4383	0.365868	1.25802	3.68968	2.44666
0.585506	1.18146	2.5055	0.605619	0.89818	1.07078
2.93883	0.647627	1.13977	1.22049	0.529275	0.955504
0.790518	0.825702	1.06681	0.581222	0.845403	1.17703
1.31654	1.78845	1.98951	1.14359	0.767106	0.341893
0.898915	1.4982	3.22281	0.916292	1.22924	0.743501
1.97252	0.37678	0.72548	0.835298	0.33215	0.530391
0.973257	1.24825	0.999079	1.18882	2.08059	1.24365
1.08323	0.698987	0.834138	0.667781	1.2512	0.502507
1.01579	1.96643	0.482683	0.692393	1.1269	1.64632
1.4364	1.39652	2.00367	1.20857	1.07656	0.766676
1.29851	0.781524	0.747362	1.49248	2.1846	0.813641
1.04968	0.866674	0.283662	0.897313	0.950724	0.986633
2.08424	1.68008	0.532254	0.532513	2.03421	1.08884
0.783735	0.947855	1.20723	1.6929	2.19542	1.34323
0.73153	0.669069	1.19084	1.9388	0.563389	1.75246
3.8031	0.54304	1.13834	1.42861	1.47004	1.11831
0.86095	1.20599	0.820532	0.941791	1.57507	2.07959
0.603241	0.695243	2.7763	1.09611	0.708405	0.645625
0.92178	0.908201	1.54843	1.01691	0.791579	2.29012
0.988064	1.84435	1.26794	0.472941	1.5916	0.827803
1.0581	1.08968	2.03866	2.22442	0.396973	0.833526
1.53785	1.72979	1.27107	0.518009	0.962656	1.46913
1.5389	0.965133	1.57977	0.545999	0.920967	2.87967
1.17484	0.708363	0.92206	0.443553	1.60468	0.90568
0.766855	0.974974	4.51184	0.423847	2.49762	2.93531
1.2646	0.909659	2.33255	1.36337	3.00222	0.695921
1.29519	0.717682	1.7754	0.896974	0.74828	0.558671
1.50749	1.47092	1.581	2.3833	1.50155	1.35247
0.979604	0.728014	1.57495	0.533137	1.2683	0.377497
0.949291	0.587926	0.550654	0.878696	1.42278	1.74434
1.37128	1.15134	2.66505	0.586709	1.16441	2.10601
1.93941	0.975237	1.00874	1.63937	1.68209	1.04805
2.28508	1.01628	0.887756	0.760547	1.45202	0.327427
1.93924	0.527932	1.0744	1.15748	3.13023	0.62893
1.51567	0.672848	1.82146	1.29222	1.24428	1.45636
1.98025	1.50033	0.734648	0.453948	0.815001	0.93573
1.21514	1.05157	0.749572	0.784834	1.64534	1.2654
1.23306	1.27755	1.48394	0.616852	0.555413	1.01685
0.996596	0.700395	0.506488	0.626244	0.346002	0.986023
1.31544	1.21041	1.04843	0.758494	1.31115	13.8565
0.785389	0.442323	1.31162	0.875679	3.52337	1.36541
1.11246	2.23164	0.488667	1.7513	4.14695	0.909426
1.00656	1.13734	2.05815	1.2878	1.70582	5.87711
1.98135	0.739368	0.46782	1.22164	2.75465	1.56341
1.21487	0.846572	1.33467	1.09731	2.64622	1.04735
1.28698	1.71079	1.131	1.50394	1.34319	2.46339
1.0398	1.28323	1.01514	0.446947	1.10391	0.528713
1.24806	1.87269	1.68495	0.57795	0.790981	1.65966
0.585036	0.473744	0.296274	1.95937	1.96163	2.08153
1.24592	1.19074	0.870812	0.690761	3.25331	5.4834
0.872791	0.855189	1.20048	0.625811	3.15268	2.22922
2.34066	0.806803	2.3745	0.915248	2.19697	3.00801
1.05661	2.62515	2.13441	0.645136	0.552994	0.90486
1.02494	2.53465	0.832236	1.29453	0.917975	1.077
1.1696	1.2721	0.785171	0.794031	1.52084	1.61034
0.779354	1.08693	0.919953	1.25376	1.93188	1.44839
1.41274	0.565999	0.567682	0.451055	1.66439	1.07157
0.594241	0.740047	0.447981	0.26316	2.83175	1.34284
0.262387	0.400771	0.839598	0.625881	2.66862	1.90471
0.517167	3.5032	0.551805	0.840957	1.1017	1.07417
2.75829	1.23338	0.556512	1.70072	0.285507	2.03261
2.21742	1.0234	0.733712	0.996771	0.770712	2.38291
1.7521	1.02828	1.28531	1.64151	2.41033	1.12568
1.2487	1.36495	1.66303	2.91615	1.36184	1.69144
0.976631	0.865295	1.1755	0.478236	0.505976	2.04522
0.649306	1.36382	1.7242	0.704213	1.0296	0.663814
0.759512	1.14137	1.14605	0.851886	2.06527	2.32529
0.5135	1.14271	1.12218	0.601963	2.20598	1.21443
2.08814	0.997171	1.34465	0.762686	4.5423	1.35836
1.84763	0.550954	1.97455	0.744552	1.25375	1.3311
1.8741	0.25374	0.377371	0.873876	0.779324	0.54001
1.30586	0.804962	1.9157	1.41366	0.176676	0.90724
1.94125	0.794301	1.09628	1.64648	3.12262	1.99422
1.57026	0.69357	1.34363	0.836073	0.672626	0.737639
1.61267	0.947577	1.26176	0.99541	1.30255	0.163169
1.87959	1.91218	0.605573	2.10115	1.22588	1.49651
0.432214	2.21437	0.822708	0.796992	0.195789	1.7241
1.04701	1.52362	2.13774	0.990536	3.32558	1.73297
1.14495	1.42673	0.657422	0.794457	2.01489	4.3494
0.825911	2.57468	0.668134	1.37354	0.908	3.37281
0.949569	1.24852	0.317531	0.704058	1.48084	1.64472
2.25357	1.79041	0.642599	0.969437	0.5318	1.7694
0.68484	0.641561	0.96535	0.551652	2.37075	1.93481
1.08405	0.887601	1.26639	1.42419	1.84443	2.145
1.10181	0.818757	0.761893	0.360101	1.35705	1.04602
0.913698	3.32253	1.20154	0.555506	1.52834	0.457184
0.452181	0.675217	1.59208	0.973021	2.0281	3.57402
1.18759	0.928952	2.46796	0.611367	1.32117	0.952428
1.01117	2.09787	1.01196	2.12089	1.17072	0.47202
0.604358	1.06367	0.500902	1.33649	1.38223	0.583385
0.546609	1.52017	2.37716	0.685191	1.76932	0.941044
0.502861	1.49734	1.01185	1.02745	3.12316	1.02923
0.53393	0.887038	1.45364	0.478931	2.21885	1.27017
0.761409	0.486096	0.469126	0.471842	1.28605	1.6077
1.2594	1.2811	1.0798	1.01193	0.531736	3.34178
1.70392	1.40482	2.0142	1.2794	1.05355	0.579437
0.779056	0.980855	1.0053	1.13408	0.505719	1.86866
1.70878	0.848609	0.593077	1.01186	1.12922	2.76704
1.10008	1.65919	1.81296	0.878602	0.89318	3.34489
0.669039	1.12185	1.14135	0.531866	1.92091	0.497231
0.351286	0.857441	1.27854	0.849581	2.23021	3.12053
0.777321	1.10254	1.26783	0.823076	0.800883	3.00213
0.649127	4.19787	1.0572	0.929921	0.983405	0.955914
0.669062	1.40809	0.264315	0.342169	1.16722	1.07496
0.654662	0.932964	0.316927	0.808096	0.869788	1.8072
0.743892	0.660197	0.813873	0.545896	0.91175	0.685353
0.360295	1.17678	1.0334	0.372443	1.43348	1.29412
0.336304	1.15237	0.877728	0.473308	1.16348	1.20354
2.1802	2.44818	1.03856	0.638413	3.75178	0.887652
0.686647	0.4181	0.745801	1.18656	1.33921	1.49709
0.924293	0.38733	0.799474	0.658546	0.774307	0.078086
0.561188	0.644188	0.685992	0.641351	2.90213	1.62895
0.702191	2.17317	0.651523	0.392532	0.975992	0.584865
0.883282	0.807389	1.20535	1.30714	1.5704	0.750667
0.602315	0.827253	0.925652	0.410223	0.845166	1.90922
1.4184	1.24578	0.83551	0.496154	1.10109	1.95996
0.924123	0.900037	1.06381	0.575703	0.983757	5.35926
0.685985	1.8124	0.479996	1.75026	2.18041	0.94076
1.69323	1.59546	1.38169	0.6651	1.38236	1.53258
0.742402	0.990789	1.08944	0.517549	1.38493	1.46119
0.587665	1.32673	0.611563	1.14786	0.622736	1.26264
0.38639	2.22788	1.0677	0.916143	0.826214	0.883088
1.24571	3.94389	1.60053	1.32699	0.493076	3.08126
0.68307	1.55165	0.253947	2.31834	1.98433	0.389159
0.448092	2.14242	0.692039	1.37655	1.81278	1.80246
0.583668	0.922227	0.77442	0.393352	2.25159	1.26239
0.443259	2.28593	2.16125	1.14087	1.0268	0.3129
2.68153	1.18937	0.706583	0.9054	1.90055	1.78918
1.35702	1.56777	0.938651	1.15473	2.24771	2.53196
1.06441	1.47626	1.28661	0.205883	1.28744	1.05008
0.519637	2.19139	1.11499	1.42417	0.754114	1.68044
0.925776	1.08764	0.863797	0.414784	1.247	3.02176
0.948102	1.10946	0.390142	0.825062	1.23114	4.11801
0.584385	1.10715	1.29189	0.50473	1.21888	0.766126
0.749731	1.95741	0.881481	1.18971	1.31758	0.615859
1.00007	2.3315	0.282112	1.36921	0.527835	1.89584
0.770603	1.40478	0.517924	0.891787	0.726374	0.715628
1.04089	0.806489	1.49141	2.6906	0.733331	0.629442
0.754191	1.59372	1.76491	0.775718	1.79326	0.25743
0.225784	1.08883	0.660672	3.67469	0.415329	1.36791
1.3563	0.727784	1.43939	1.53457	0.318584	1.63742
1.65778	0.65315	4.63934	1.10995	0.674261	1.46533
0.727234	0.725337	1.23792	1.17019	1.05582	1.73469
0.611885	1.04147	0.799994	1.36765	2.3889	3.79984
0.433075	0.577291	1.39454	0.387852	0.922368	0.802778
0.812611	0.923835	0.81143	0.775662	2.94892	1.90473
1.31681	0.541831	0.939015	0.254834	1.05021	1.57608
0.508662	0.743795	1.38954	0.322352	0.669181	0.663867
0.522532	0.855902	1.2407	1.10238	0.329116	3.12127
1.45633	2.17503	1.98013	1.20616	0.978537	0.906185
1.07985	1.69816	0.428205	0.885832	0.899112	1.83454
0.606064	0.833081	1.15157	1.93248	0.551919	2.25106
1.10931	0.827388	0.828735	1.02581	1.00833	1.37125
0.639431	1.3754	1.69659	0.342835	1.48646	0.784286
1.77623	0.717776	1.56137	0.739377	2.31283	3.47459
1.42166	1.03141	2.4127	0.433561	1.12161	5.76154
0.797381	1.31759	0.995744	0.713295	2.05612	2.63343
1.12823	0.573772	1.2018	0.243434	1.38268	1.66343
3.27208	1.17168	1.27639	1.38996	1.95759	0.429423
0.840693	1.91742	0.88358	1.41975	0.668082	0.890806
0.437556	1.26363	0.733807	0.510811	1.39764	2.35894
1.17621	0.938861	0.705263	1.41621	1.15439	0.90606
1.29017	0.638439	0.506803	3.08485	2.18637	4.68406
1.52442	1.11718	0.541282	0.695665	0.758779	1.47803
0.526649	0.706145	0.744942	1.1363	2.21825	0.668717
1.29899	1.52073	2.7362	0.493631	0.511833	1.12132
1.12646	0.746172	0.400651	1.82884	1.09093	1.0839
1.7072	0.8879	0.921039	0.577235	0.702275	0.355461
0.689729	1.8605	1.5057	1.27203	0.45647	0.993832
1.07297	2.53791	2.81823	0.766044	1.5085	1.96235
0.661167	1.1838	0.459259	0.126691	2.44103	2.19478
1.03632	2.09512	1.36511	0.835279	0.611186	0.339303
0.941129	1.3098	2.62165	1.67279	0.619359	1.64817
1.02613	1.54896	0.891988	1.19927	0.917048	2.2711
0.891298	0.637121	1.19287	1.21542	1.45991	1.45871
0.337921	1.08531	0.766679	0.422378	0.353052	1.04002
1.52063	1.10289	0.755485	0.442949	0.682523	1.46072
1.35261	1.10708	1.88601	1.07184	1.16309	1.05264
1.81064	1.09016	2.42382	0.350204	3.41674	0.868315
0.893089	0.784493	0.863762	0.606339	1.8162	4.19798
1.33872	1.26167	0.913905	1.73502	0.658487	1.64318
0.750733	1.42221	0.759348	1.95427	0.362115	1.96186
1.20104	0.57434	2.00039	0.420748	1.38688	0.752442
0.99923	1.41093	1.47784	0.687388	0.689309	1.07326
1.12333	1.09387	2.96496	1.59402	1.52513	1.96335
0.973294	0.773274	3.75637	0.777657	0.847843	0.981595
0.371764	0.806711	2.80833	0.992063	0.276355	3.94682
0.891476	0.841308	1.26319	1.66982	0.415746	0.872484
0.580735	1.30431	1.94132	2.95886	0.474885	0.160686
0.777366	0.627696	1.02183	0.388885	3.79521	2.1039
0.948871	0.946542	0.519231	0.56375	1.22246	1.28196
0.395201	1.16019	1.01424	4.37289	1.2637	1.43587
0.861298	0.937794	0.991267	0.405057	1.45687	3.23395
0.690004	0.817949	1.23002	0.813111	4.87048	0.970722
0.756366	1.17679	0.315581	1.49139	1.11886	1.64373
1.14815	1.09657	1.53679	2.10585	1.14018	1.04397
0.747466	0.683737	0.528159	3.61341	3.00185	1.99733
0.438438	0.927211	0.964155	1.25731	1.79202	0.702075
1.54373	0.814529	1.64243	0.624698	1.42833	1.387
0.902856	0.679529	2.51232	1.62302	0.787359	3.45606
1.63547	1.18987	1.37024	0.82636	3.6347	0.408225
1.71174	0.954089	0.780804	0.942781	0.390645	1.58802
1.0169	0.976753	2.22016	0.935916	6.54927	1.11441
1.29089	0.860349	2.24507	1.36329	0.823253	1.67447
1.4602	1.30612	0.804664	0.967377	0.325347	2.29404
0.81282	1.36775	1.45643	0.552046	0.941011	0.76667
0.705468	0.754666	0.970435	0.957272	2.03107	1.50998
1.11763	2.32426	0.737857	0.523881	1.44371	1.07137
1.42131	1.01458	0.82763	1.2916	1.52139	4.45232
0.798075	0.688219	0.767336	1.29337	1.0042	1.8554
0.617702	0.71889	1.0378	0.751498	0.628148	0.110183
1.31468	2.13985	0.813248	4.46952	0.564778	0.844797
1.21914	0.730401	2.29863	2.67565	0.398182	0.488485
2.81195	0.402629	1.43053	2.10315	0.832551	2.01749
1.92928	1.7261	1.53644	0.374771	1.28113	2.04715
0.786037	1.51903	2.87349	0.64	0.722784	0.858442
1.26408	2.08426	0.562218	0.963181	0.508585	2.19313
0.817276	0.65396	3.06728	3.52043	0.660524	1.31299
3.33309	1.54176	1.63394	0.688275	0.89361	0.99832
0.566936	1.81782	2.20842	1.51147	0.15034	3.04999
0.751546	2.66494	2.65568	0.680961	0.882915	1.846
1.35106	1.19572	0.933561	0.900954	0.300532	0.469523
2.22681	0.993653	2.10467	0.546486	1.02561	12.4491
0.944116	1.56148	1.05471	3.53872	0.367615	1.40615
1.03555	1.30736	1.25144	0.683981	2.19185	1.66178
1.67488	0.845063	1.25268	0.873186	4.25346	4.29027
1.34263	0.823162	0.526697	2.43235	0.766167	7.1531
0.441537	0.890043	0.710344	1.10798	1.20745	9.22567
1.78019	2.01898	0.956207	0.907327	1.38597	3.03819
0.845664	2.77499	2.36999	0.538011	0.528755	1.60066
3.18727	0.587929	0.47083	0.472128	2.96373	0.980764
1.57373	0.542328	0.282818	0.581176	1.28373	2.47472
0.911736	0.487513	0.970972	0.701672	0.685558	10.4878
0.869418	1.06185		0.823015	1.84733	3.52284
1.43224	0.833309		0.891908	2.96398	1.15147
1.26635	0.700928	0.312603	1.3402	1.35215	1.67935
1.91416	0.608446	0.560971	1.39193	0.987294	1.42518
1.58831	0.764079	1.39602	1.45081	4.05893	0.602531
0.950943	1.75964	0.94862	0.389727	1.48709	2.08489
0.798524	0.820111	1.10254	0.599428	1.28288	2.08811
1.75037	1.2069	0.767925	0.609697	1.17993	4.14229
1.28602	0.97727	0.428671	0.718214	1.46639	1.01377
0.831969	0.689394	0.589093	0.771026	1.1717	5.39304
1.46972	1.40384	0.685963	5.20009	1.4535	2.13576
0.579246	0.690128	1.18025	1.86587	1.16411	3.23627
0.505659	0.594997	1.37048	0.609719	0.476401	1.28303
0.774902	0.788129	2.24441	1.67686	1.6053	2.2683
1.38254	0.93538	2.01812	0.369018	0.773837	2.19738
0.762649	1.33005	2.39262	1.25169	0.794776	2.02506
0.952563	0.515195	0.893508	2.3967	0.495778	0.62883
1.49373	0.651478	1.28792	0.99565	1.24042	1.24271
0.762657	0.693188	1.63845	2.64104	1.06145	2.11999
1.49625	1.04698	1.04424	1.26242	0.697486	8.41081
1.22832	1.11921	1.5243	0.928613	0.785583	8.64838
0.551014	2.10008	0.942742	0.744196	4.66667	1.2747
1.26237	1.6369	0.875212	0.534362	1.69137	1.2086
0.841938	0.817947	0.942704	1.04268	0.840274	2.11261
1.35715	0.762415	0.927595	0.686411	0.786529	0.5393
0.668355	2.69853	0.503093	0.926321	0.465006	7.11012
1.81451	1.12648	0.676912	2.88791	0.398435	2.70298
1.12816	0.884712	0.882775	3.35185	0.294152	4.38534
1.20344	1.39661	0.882802	1.33689	0.67594	0.887369
2.46293	1.57758	1.00464	0.678702	0.85491	0.656188
1.11349	1.53136	0.675345	0.434734	0.608311	3.36559
0.694052	0.816588	1.83306	0.551821	1.0353	0.909081
0.710224	0.83529	0.959541	0.624493	3.85091	7.08571
0.724266	1.72721	0.821917	0.510943	1.74104	1.44786
2.85489	0.598028	1.42271	0.744621	1.17193	1.13277
1.45696	0.593486	0.656915	2.99786	3.9171	1.11851
1.65119	0.643873	0.592519	2.2704	0.864624	10.9596
	0.910412	2.78491	0.91027	0.903172	1.0055
0.824078	0.699613	2.3649	1.95769	0.272448	0.161736
0.67848	1.16952	0.994412	0.685294	1.249	0.793105
0.945976	0.826237	0.833948	2.47452	0.551322	0.854606
0.946232	1.12469	1.36217	2.09124	2.09452	4.86777
0.864228	0.765314	1.84575	1.2993	0.496151	0.714039
1.20061	2.07576	0.953464	1.55688	1.71954	2.20529
1.18457	1.24988	0.607878	0.514293	0.856363	2.44939
0.986289	1.0755	1.08687	0.600808	2.36196	1.97002
0.787116	1.41227	1.82207	0.691672	0.809912	2.35268
1.01206	1.47877	0.613056	1.94205	1.3874	1.59902
0.958138	1.25739	1.06465	3.20083	0.769094	0.380923
0.74211	1.00761	0.469136	5.6416	0.514464	1.48482
1.06257	0.753022	0.751168	6.77388	1.59091	1.2989
1.06024	1.20442	1.94636	0.532498	2.53089	0.699925
1.33338	1.43485	2.38157	1.21014	0.554932	2.01322
1.12834	1.22508	1.21833	1.7554	0.347677	6.52731
0.751444	1.25301	3.43796	0.633738	0.827223	6.24096
0.873333	0.804092	0.955964	0.415594	0.967072	1.30989
1.03736	0.911475	1.28547	3.89895	2.85135	0.13884
2.36837	0.752279	1.52551	7.42004	1.07225	0.927514
1.15378	1.24155	0.909736	1.10655	1.07113	1.1598
1.20497	0.650339	0.93949	3.18161	0.911568	0.308364
1.0743	1.67544	2.52451	1.24876	0.439123	1.42476
0.705335	0.781507	0.616921	0.950287	0.382751	0.352235
1.18596	1.04359	1.18419	2.54458	0.816046	0.581335
0.869783	0.600998	1.22202	4.1097	1.32234	1.52826
0.861157	2.0807	0.362492	3.39188	0.688368	1.03287
1.31896	1.12006	0.764371	1.15589	0.381021	1.44997
0.456957	2.00187	0.825617	1.13956	1.20325	0.903025
0.894225	0.828452	1.05987	0.775691	1.78382	7.56708
1.00709	0.823377	4.58448	0.977106	1.84431	0.58808
0.856181	1.17284	0.717893	1.428	0.673892	1.56086
0.486954	1.11462	1.78849	1.052	0.993336	4.1882
0.80517	0.88785	1.32589	4.18243	1.09045	1.90795
0.973996	1.02206	1.29899	4.81258	1.57928	2.71054
1.19695	1.90171	3.09367	2.6313	0.56866	4.98354
0.898192	0.552623	0.789662	1.43334	1.14025	0.563778
0.795014	0.746432	1.28897	0.457025	1.47991	0.139342
0.881326	1.45515	2.15266	4.92802	0.695698	0.589611
1.42573	0.911357	3.89437	6.2529	0.748255	3.60116
1.66596	1.10371	2.08821	5.8962	0.946596	1.21643
0.581339	0.575355	4.55801	1.89157	0.509419	1.24388
1.49968	2.38844	0.603635	3.64093	2.26291	0.801259
0.748952	1.25179	1.24038	1.94124	0.74497	0.504356
0.707779	1.09979	1.26557	1.29196	0.986596	0.685248
0.823425	0.536271	2.52894	1.09155	0.660445	0.864504
1.04406	0.9225	2.30244	1.34278	0.450793	2.42969
1.78535	0.977509	4.07572	1.49441	0.754275	1.93186
3.2639	0.589266	0.400297	1.06635	0.547633	1.53136
0.695493	1.12516	1.08342	2.15582	2.78798	0.553832
1.13156	1.6648	1.31446	1.00726	0.968163	0.554239
1.29823	0.938849	1.68421	1.64345	0.574591	0.470133
0.717428	1.4571	0.947597	2.35456	1.48764	8.47092
0.761606	1.07552	4.04065	1.26043	2.28998	4.11343
0.446132	1.08414	0.192888	0.766062	0.810257	0.82403
0.845376	1.2239	0.403918	1.37174	1.06611	0.484085
0.924902	0.894446	0.862548	1.02833	0.99743	0.460259
0.792156	0.529079	0.623005	1.38473	0.457871	0.55877
1.8066	0.666024	1.18175	1.4964	2.38598	4.39676
1.82622	1.25833	3.05557	4.05599	1.23825	0.583046
0.87232	0.883284	2.59327	1.85018	1.63855	5.1999
0.622131	0.369527	0.2912	3.65877	0.861668	2.9004
0.571751	1.1507	0.682045	2.47347	2.20152	1.01903
1.11884	1.35919	2.69406	1.52909	2.44963	1.92034
0.25447	0.543666	2.54581	1.22494	0.819797	2.58444
1.763	1.07416	1.27949	3.82009	1.8768	6.21559
0.702248	0.849775	4.00995	1.3759	0.783905	0.880465
0.596784	0.71212	1.44408	4.31476	1.2093	1.24334
0.705188	1.6854	0.347347	2.1877	2.27102	0.774722
0.806858	1.36783	2.14368	3.44443	0.762017	3.56028
0.851538	1.52248	2.92441	1.41438	1.18211	1.72106
1.81859	1.89841	1.22476		0.540215	0.550436
0.636621	1.01476	0.635475		1.3035	1.12658
1.23983	1.1415	1.0622	0.983623	0.38429	0.946584
0.782993	1.91248	1.69682	1.4921	0.587685	4.77099
0.917536	1.04935	1.43252	0.977848	0.614345	5.87667
0.874546	2.3152	0.914509	0.673017	0.704888	5.43136
0.894936	1.31074	2.29316	1.47175	0.818487	0.8063
1.02809	1.15827	1.38679	2.06623	1.64201	1.30624
0.566241	0.734486	0.527584	1.48891	0.880938	1.52586
1.85401	0.944816	0.821589	0.849882	0.177843	6.97062
1.8799	0.618797	0.968563	1.44766	0.585854	0.712786
1.16598	0.925591	1.54118	0.778847	4.14441	6.17002
1.74823	0.531829	2.05862	1.97139	0.858932	5.7333
1.66617	0.958563	0.986753	1.91468	1.41885	0.544921
1.6347	1.68481	1.07612	2.11396	0.56787	0.867131
0.623381	0.574657	0.710129	0.358488	0.43154	0.552469
2.44694	0.631977	1.15592	0.668923	0.727336	3.09102
0.850684	0.885431	1.05141	0.633351	1.22969	1.17853
2.16102	0.835012	1.95094	2.41872	0.881343	2.19117
1.43135	0.869938	1.45892	1.41287	3.69811	1.55782
0.768988	0.974211	0.881673	1.1541	1.34687	0.49406
2.46364	0.749688	1.77499	1.28239	0.606583	4.50656
0.57033	1.27926	0.538715	0.492806	1.85061	0.203543
0.536623	0.6564	1.54044	1.36024	1.35243	1.64986
0.88107	1.76811	1.6307	1.38858	1.43006	0.448867
1.75343	3.02473	1.81953	1.30628	0.503461	0.302087
0.881013	1.0768	0.653793	4.27022	1.74771	2.73335
0.770356	0.758809	2.13219	1.40125	1.21849	1.30558
1.01962	0.591344	0.289688	0.905149	0.852095	5.63176
1.83824	1.2283	0.689056	1.40095	0.826197	0.200618
0.772172	0.512057	0.895845	1.20804	0.906843	1.28212
2.14823	1.13822	4.31658	2.11263	0.987329	1.44859
0.935599	0.962509	2.68229	4.24221	0.283885	0.600134
0.775404	1.57921	1.32658	1.59704	7.96199	1.70454
1.71707	0.680447	0.946307	0.785512	0.994487	1.94176
2.12805	0.709672	1.25236	1.30106	1.27123	0.263542
0.401339	0.720594	1.09983	0.984499	0.796995	1.38632
0.994304	0.658396	0.935529	0.512352	1.45036	0.654233
0.580027	1.41702	0.463692	1.16982	3.04512	0.536924
2.01796	1.58995	0.496117	0.58473	1.22634	3.41212
1.78648	0.531883	0.492132	1.40001	1.362	1.2512
1.19909	0.481643	0.377919	2.37802	0.950618	1.25039
1.70707	0.586038	0.728585	0.916927	0.608747	0.822959
0.563498	0.563825	3.39183	1.28193	2.23733	1.39864
0.577699	1.75389	0.995356	1.17891	0.673512	0.740991
1.24664	0.701712	1.26915	0.46072	1.84511	3.14729
1.26502	0.964847	0.89269	0.906913	0.717871	1.66631
0.94172	1.06902	4.02023	4.39548	2.72941	3.63379
1.03834	0.695379	0.492054	1.37769	0.919995	0.846237
0.787742	2.28746	0.702797	1.36272	2.23731	2.6799
1.0452	1.91798	0.320221	4.42973	1.07951	0.455186
0.806455	1.55799	0.409758	1.83443	0.335098	0.813276
1.4421	2.8317	2.35356	1.37036	1.19002	0.757952
0.463645	0.471519	0.580096	1.00606	2.0032	0.823272
0.14431	0.904767	1.56285	4.46109	0.316122	0.72465
1.97882	1.49186	0.77091	1.26432	0.879337	0.762292
0.835535	0.744237	0.79699	0.672457	0.761117	0.850603
2.20269	0.763435	0.637715	1.06434	3.58754	1.89558
0.704357	1.35593	1.17322	2.01896	0.873833	4.66971
0.91384	0.705244	0.876063	1.30147	1.42451	1.4046
0.531568	2.8488	2.79457	1.47326	1.11438	1.04273
0.913524	0.859783	0.716972	1.21958	0.681424	0.769777
0.565498	0.764351	0.471975	1.47523	0.866652	1.59904
2.27178	1.3282	0.166177	1.22296	0.399312	0.694168
0.416853	0.758683	0.547291	0.858493	2.71579	1.15142
1.24971	0.978943	1.8263	0.307005	0.718041	1.0308
1.34478	0.848768	1.39107	0.532342	1.02813	0.515082
0.883444	0.362527	1.45951	0.758625	0.605307	1.57086
1.11383	0.787392	0.546457	0.807637	0.73822	2.03734
2.09571	0.75333	3.13381	1.49107	1.50738	2.5332
0.955941	0.987811	3.24919	0.766642	1.2815	2.2372
0.617388	0.309437	1.24477	1.15122	1.24708	0.684201
1.37151	0.861212	2.9451	1.17805	0.804559	0.813922
0.947135	0.716368	0.393342	2.16928	0.51492	1.55742
2.14009	1.18183	1.99135	1.81221	3.09816	0.80056
1.73061	2.22197	2.05325	3.28716	1.1778	0.489975
2.47249	1.83745	1.19045	1.65479	1.55815	1.49425
2.43731	1.18166	0.954946	2.53462	1.70884	1.45344
0.766117	0.90333	3.88786	0.796901	4.6937	1.71909
1.33622	0.812183	0.827425	0.990091	1.47082	0.396955
0.985034	1.83173	1.1004	0.860159	0.980843	1.8404
1.24641	0.811652	1.52436	1.21486	0.823227	0.276142
1.61276	1.2573	0.781136	0.440924	2.96291	1.76566
1.63582	0.671929	0.751081	0.894763	2.47589	1.16044
1.8475	1.00995	1.27549	2.89362	0.688092	0.469754
0.855058	1.42405	1.64325	0.245405	0.381557	2.66344
0.945322	1.58711	2.46185	1.88741	1.57454	1.36349
0.77683	0.394329	4.34506	1.28666	1.14762	0.670546
1.20684	2.89618	3.44105	5.08549	1.47304	1.58631
1.28087	0.87393	0.615989	0.479006	0.494201	6.2173
1.46078	1.01087	0.764341	1.4233	1.90486	1.93837
1.53057	0.877533	8.97967	0.479575	1.86002	2.23906
1.24195	1.36853	1.17418	1.97523	1.27522	1.72556
1.12788	1.15447	0.85342	2.27417	3.52806	1.85834
0.923876	0.814725	2.57302	0.608932	1.50663	0.902613
0.553538	0.505338	3.53869	0.437097	1.22742	0.314597
0.624829	0.996564	0.586685	0.399853	1.46662	1.89043
0.925871	0.640432	1.16466	0.492631	2.30765	3.26552
1.96478	1.92909	1.05387	1.81474	0.778361	1.03574
1.70527	0.476122	0.480992	1.06543	3.21773	1.16063
1.192	0.345224	0.642375	3.61011	1.91026	1.55778
0.940237	0.541535	1.55231	0.857361	1.01758	1.52597
1.51199	0.88236	2.90367	2.02987	1.24737	0.875396
0.873053	1.19413	1.89212	1.38784	0.770682	3.46484
0.781832	0.721202	0.460242	0.58204	0.56083	1.17309
0.55415	0.776775	0.963832	0.880893	2.66472	1.10451
2.32191	0.631817	0.857439	0.709785	1.48894	1.03737
0.880776	1.59926	1.61682	1.59981	0.706652	4.10846
0.789024	1.1608	0.643946	0.396803	0.250797	1.50072
1.54998	0.636533	1.25451	2.23781	0.540903	2.35892
1.67813	0.567045	0.961821	0.48676	0.511034	2.04535
0.750592		2.53715	1.0456	0.37339	0.53362
1.27663	1.28452	0.803832	2.57137	0.374592	3.15738
0.631935	0.789691	1.38584	1.57275	0.443179	0.973423
0.737801	0.924686	0.526697	1.49815	0.883421	1.28181
1.26642	1.3975	0.289463	0.425673	2.13498	2.23662
1.47578	1.4402	1.3639	1.08445	1.8745	1.49628
0.882546	1.70242	1.82328	0.828135	1.11841	0.605071
2.15398	0.850271	1.17749	3.46916	1.5802	0.595898
2.08941	0.919851	1.35013	1.22324	1.74544	0.974663
0.508497	0.856603	0.766805	1.18177	2.23193	0.921441
1.71059	1.1805	1.29384	0.418219	1.50992	1.58608
0.75611	0.794668	0.808258	1.04645	0.378753	3.37172
0.743378	0.797253	0.702561	1.1158	0.435142	4.72174
0.224155	0.741976	1.20098	1.87008	0.414031	1.40735
0.941049	0.637498	1.04382	0.70811	0.639738	1.19698
1.55119	0.781855	2.07245	1.55662	1.59217	1.64863
0.797857	0.614728	1.17329	0.483545	4.55982	2.51376
1.24181	0.811226	0.584117	3.85758	0.957288	0.982213
0.734838	0.792728	1.15476	1.05953	1.05722	1.81735
1.46522	0.907739	0.750012	1.15457	0.559941	1.02836
0.865679	0.72804	0.170985	0.557238	1.28967	1.57935
1.1818	1.94387	0.50396	0.470907	3.02808	6.24318
0.933904	0.998831	1.14674	1.56874	1.38088	1.47401
0.884125	0.890384	1.47274	0.949777	0.616575	2.83176
1.02592	0.674957	0.991702	0.762711	2.00891	0.926048
1.68705	0.640594	1.09113	0.842007	1.22018	2.97593
0.918848	1.40924	1.17636	0.855419	1.11993	1.5509
1.60098	0.889219	0.888155	0.405935	2.79649	1.27778
0.726604	1.56746	1.43034	1.00295	2.94852	2.00057
1.2524	1.41331	2.01652	0.448509	0.804132	0.272555
0.900982	1.16982	1.21876	1.26273	2.09939	2.21494
1.48709	1.52081	0.417189	1.32381	0.504611	4.01659
1.11838	0.770761	1.3468	0.659735	1.9649	1.86594
1.7322	0.81853	1.36533	0.959264	1.71928	1.45394
0.505963	1.01345	0.573052	1.60302	1.0488	0.656753
0.643563	0.959194	1.43098	1.73832	2.5367	2.31665
2.39856	0.910837	2.78776	1.84538	0.595232	1.22377
1.43975	0.964024	1.15317	0.355836	0.894792	1.1599
2.07667	0.637939	0.681488	1.38154	4.32467	3.56379
1.0886	1.12067	0.893182	1.08193	0.826908	0.392848
0.470684	0.770965	0.88877	2.1779	0.579021	6.52307
1.31111	0.756644	0.488545	0.712261	0.49427	0.804829
1.35666	0.610336	0.817881	0.727936	1.37123	0.960402
1.38163	0.910086	1.43982	1.18811	3.41892	0.630707
0.677175	1.2368	1.75789	1.87709	0.744575	2.64412
1.2525	0.638205	1.03691	2.07753	1.79342	3.52526
1.31895	0.734359	0.823175	0.598989	1.09347	2.28272
1.20745	0.980332	1.69472	1.14813	1.46804	1.84211
0.558361	0.634423	3.49946	0.644187	0.755057	0.551798
1.93024	0.722897	1.61518	1.12734	0.276711	1.39977
0.677306	0.877314	0.984477	1.86831	1.01331	2.55511
1.07881	1.08112	0.8712	1.87862	0.623716	1.36827
0.530642	1.80412	1.12862	0.345977	0.547756	1.96669
1.39447	0.663395	1.35858	0.88616	1.42018	1.15997
1.67094	0.991099	0.319493	0.530447	0.475833	1.67725
2.42296	0.940676	1.87784	1.5407	0.908102	1.73503
1.9268	0.623248	1.07059	1.33946	0.586193	1.01164
1.82326	0.88243	1.36433	1.08243	0.461726	0.916678
1.07345	1.01723	0.901019	1.54829	0.50382	1.3332
1.14637	1.00403	1.01581	0.404285	1.46038	1.90609
1.08092	0.934325	0.698474	0.787019	0.923883	2.79753
1.1869	0.611352	0.56686	0.574756	1.82331	0.919232
1.76116	0.82587	0.657536	0.785257	0.666714	0.283004
1.03293	1.11779	0.880943	2.11281	0.88531	0.66003
1.04111	1.01098	0.714021	1.08718	2.00066	0.435396
1.04581	1.17782	0.957272	0.470584	0.857542	0.683142
0.951929	0.969198	1.02262	1.08525	0.941433	0.794313
0.308092	0.778827	0.578394	0.887733	0.353198	1.07204
1.47541	0.773087	0.796678	2.24278	2.05067	1.08674
0.772043	0.697906	0.826027	0.427814	1.59256	1.59246
1.00314	0.92031	1.32122	1.76782	0.745001	1.10546
0.519442	0.624235	0.718837	0.802974	0.626388	1.27007
0.569275	0.909239	0.737631	0.860425	0.4878	1.72495
0.876478	1.04041	1.91075	0.90872	1.0513	7.99345
1.205	1.76355	0.696484	1.16012	2.59487	6.56184
0.439599	1.01684	1.44777	1.42833	0.70164	2.1646
0.896967	1.16033	0.496845	1.02745	1.45969	3.93663
0.632689	0.885527	0.442486	0.950401	0.480345	1.40632
2.11439	0.990275	1.06267	0.88172	0.603125	1.34452
0.648051	0.769603	0.553	0.849377	0.485305	1.39158
5.24485	0.766926	0.87447	1.52477	0.89093	0.924482
2.21193	0.789565	0.94128	0.795269	1.63257	1.01238
0.330915	1.97009	0.902437	0.764256	3.8685	3.00907
1.56292	0.990206	0.797639	2.6216	1.38821	0.848546
1.34207	1.08045	0.777461	2.26788	2.23192	1.57046
1.20664	2.09495	0.955306	1.15467	1.6445	0.956785
2.9023	0.863786	1.34572	0.913946	1.87161	2.05415
0.502229	1.44738	0.645254	0.717961	0.495107	0.700715
1.28022	0.752095	0.780096	2.53382	0.499795	2.18116
1.5716	1.23734	1.45786	1.01744	0.625278	2.14152
1.72248	0.83525	0.807255	1.74696	2.19681	1.66807
0.779963	0.825969	1.9546	0.785173	0.558569	0.98227
0.367572	0.882703	1.05285	2.1828	1.23184	1.88349
0.767059	1.02505	0.569528	0.977508	0.456699	0.459584
1.67408	0.823447	1.09295	1.1136	0.761754	3.37137
2.05736	1.05174	1.089	0.632889	1.84088	0.568168
1.53473	1.18878	0.74206	1.28737	1.0883	1.45961
1.33564	1.06706	0.841729	0.95279	1.16229	1.77931
0.774012	1.35555	0.869789	1.56972	0.662147	4.85114
1.74796	0.725752	0.781095	0.73143	1.5269	1.20809
2.60218	1.11776	0.850008	0.533177	0.559023	1.05497
1.24448	1.16994	0.778182	0.642269	0.350309	0.882297
0.431579	0.979333	1.04968	3.55792	0.81235	2.20036
0.364976	1.10745	0.783825	1.5971	0.430148	0.395565
0.887519	0.949015	1.37283	1.30605	0.286951	2.34664
1.57075	0.494185	1.43287	1.15363	0.995828	1.88069
0.372819	0.948564	1.08216	1.47677	0.535427	0.72086
0.478763	0.776142	0.94545	1.13562	0.870181	1.13994
0.703956	0.628454	2.01532	1.14342	0.489927	0.479206
1.11999	1.3764	1.60066	0.705393	1.38774	4.17483
0.516147	1.14461	1.77716	1.12139	0.63742	3.25431
0.671952	1.05511	1.57423	3.41012	1.03691	3.90727
0.814621	0.707566	1.27999	0.332001	0.791001	0.319388
1.37351	0.695671	1.54192	0.750637	0.916951	2.2305
1.46834	1.33328	0.922327	2.45342	0.857665	2.13662
4.60935	0.930508	1.465	0.80241	0.948506	0.213987
1.60621	0.590756	0.651258	0.817299	0.612498	2.11652
1.11145	1.57492	1.17548	0.495635	0.92181	2.80501
1.08669	0.992405	0.435061	1.02191	1.08653	0.711451
0.877839	0.707512	0.678966	0.618472	2.08348	0.52218
0.544188	1.00316	1.1429	1.01642	1.02143	0.684356
1.52087	0.778208	1.25158	0.701626	0.656031	0.896963
1.07828	0.894994	0.627107	0.933503	1.33271	1.02936
0.439029	1.28542	1.77719	2.32157	0.532134	2.61248
0.925603	0.9165	0.585196	1.69393	0.963174	0.404647
0.975918	1.27367	1.15919	0.668339	0.705901	0.544052
0.373522	0.950604	1.45038	0.891721	0.916102	0.812051
1.17086	1.07292	1.1685	0.830249	0.667061	1.26583
0.953616	1.10325	1.03743	1.24217	0.638912	0.215936
0.370376	1.40408	0.512242	1.20606	0.750934	1.57679
2.12032	0.603167	0.83288	0.380402	0.784192	1.12873
2.86961	0.630875	0.995466	0.911236	1.23774	0.382534
1.45462	0.731364	1.04112	0.49245	0.528149	0.987431
1.65283	0.797153	0.712312	1.7524	1.13304	1.17931
2.1603	1.27276	1.1103	0.846074	0.725175	0.987954
1.94925	1.03157	1.13218	2.05455	1.19341	1.03433
0.878477	0.8388	1.57341	1.70697	1.50555	1.02852
0.680555	1.09992	1.42501	0.730809	1.65107	4.22679
0.824016	0.643159	0.73047	1.10633	1.57554	0.734342
0.850528	1.38376	1.12843	0.815163	0.982311	0.330244
0.311519	1.22026	0.46214	1.46189	1.0234	1.35391
0.645369	0.800225	1.22296	1.26693	1.00822	1.62576
2.47016	1.10122	1.71683	1.43063	0.753803	0.765673
0.93502	0.677389	1.91812	1.05518	1.09803	0.747791
0.822305	0.92541	0.988324	0.981946	1.13783	1.60732
1.56767	0.75804	2.02013	0.907437	0.765544	0.406466
2.35908	0.932892	0.760876	0.539527	1.54869	0.600316
1.53258	1.08975	1.24977	0.948175	1.00561	0.291327
0.872117	1.51128	1.2956	2.57304	0.389411	0.53593
0.779239	0.888889	0.896796	0.92139	2.93301	1.52932
0.969241	0.903743	0.44978	0.80994	1.18165	0.215531
0.770782	1.15962	1.70822	0.513504	0.680415	0.419894
0.622992	1.13871	0.472889	0.802381	0.799261	1.32094
0.465621	0.93911	0.913743	0.840299	0.553221	0.271772
0.770415	1.67502	2.73774	1.47183	0.447842	2.90968
1.37645	0.905308	1.49199	1.84111	0.701526	0.417011
1.11705	1.8497	0.915599	0.831202	0.823803	0.477067
1.13317	0.767152	0.980335	1.52342	1.58851	1.56637
1.21862	1.36723	0.831484	1.44283	1.13631	0.185953
0.629508	0.479529	1.48601	0.314989	0.555041	0.33473
3.1587	0.573758	2.39705	3.43165	0.654349	0.543831
1.41017	0.934769	0.745509	0.559086	0.873233	0.272125
0.291476	0.841889	1.00479	1.27032	1.33539	0.576194
1.15109	1.00494	0.971229	1.14256	0.936225	0.214379
1.15913	0.856458	0.818034	4.43023	0.792288	1.163
0.434353	0.700068	1.59651	0.70545	1.70434	1.24827
2.56526	0.639267	1.53439	1.17584	1.43399	0.502169
1.7319	1.33473	1.53728	2.30937	2.19736	0.630945
2.80742	0.693419	0.728277	0.729588	0.780111	0.460418
2.03387	0.955651	0.886388	0.552225	0.593281	0.301437
1.26084	0.762719	0.916157	0.691258	0.52182	0.213015
0.38137	0.612804	1.17607	1.91255	0.82402	1.08178
0.511541	1.30871	0.350656	0.961071	0.841993	0.905849
0.98375	1.72274	2.2087	1.30285	1.41997	0.497846
0.755208	0.84845	0.710579	0.735846	0.540715	0.84218
1.44144	0.623609	0.680119	1.28922	0.578323	0.511822
1.7023	1.48687	1.36553	0.815152	0.995474	1.21445
2.48974	1.44766	0.615908	1.39543	1.9007	1.04299
1.39891	1.44833	0.620216	0.934602	2.24743	1.10418
1.35813	0.743213	0.897878	1.30295	0.759879	3.93579
0.975677	0.872784	1.19779	0.89604	1.88743	1.20925
0.769808	1.67612	0.835165	0.767938	1.50118	0.451148
0.544668	0.904293	0.915056	1.40561	1.15552	0.639711
0.956811	1.5738	0.936946	2.6163	0.865359	0.753972
0.941422	1.11903	0.761831	0.821241	0.90743	0.905651
0.753431	2.13273	0.975305	1.69805	1.76213	2.15166
0.902987	1.93078	0.775859	2.09759	2.03681	0.600177
0.763528	0.714158	1.41485	0.710701	0.701294	0.324757
0.35437	0.882619	1.56832	0.818686	0.469829	3.66386
0.93602	1.23352	0.842358	1.02292	1.74352	1.43186
0.765213	0.814863	2.09169	0.762434	1.05079	0.952
1.0329	1.24392	1.14287	0.376102	1.95325	1.68477
1.05349	1.07604	1.27645	0.909459	0.66009	1.6261
1.51751	1.04952	1.23148	1.2447	1.16796	1.94528
0.607756	1.04388	0.561002	0.818409	0.896575	1.29256
0.950803	0.468036	1.13239	0.677523	1.4828	3.37175
0.736848	0.896846	1.30749	1.26051	0.874999	0.614353
0.742518	0.732974	2.08607	1.18893	1.64848	2.50543
0.717194	1.14687	0.879172	1.63752	1.21822	2.8338
0.358814	0.718436	0.880116	3.02991	0.657221
1.00262	0.697511	1.00972	2.23413	0.593371
1.9508	1.73282	1.39844	1.83794	1.03179
0.80892	1.12417	0.692743	2.34359	0.865523
1.16389	1.16465	0.738956	0.918647	0.706267
0.499783	0.847184	0.99138	1.17889	0.608532
0.842824	1.29048	0.698784	2.98809	1.12977
0.728071	1.87229	0.9729	1.26096	1.36484
1.12052	0.335152	4.6304	0.768794	1.16696
0.532823	1.11118	1.34219	0.738468	1.23608
0.794017	0.844973	0.900115	1.13563	1.75528
0.978773	0.905988	0.779653	1.30679	0.834646
1.89403	1.59077	1.19373	0.807076	0.637592
0.296597	1.01018	1.02719	1.30481	0.631601
0.681688	1.33126	1.39817	1.55687	2.68792
0.982778	1.07713	0.79995	1.79377	1.80671
0.86625	1.58147	0.585518	4.33786	0.910811
1.2152	0.723599	1.1409	0.997855	0.819227
0.810473	0.543171	1.37238	0.598529	1.94644
1.37341	1.22233	1.24964	1.8713	0.970346
0.679123	0.673073	4.20036	0.824971	1.08874
0.661337	0.906855	1.12852	1.8024	1.18522
1.29465	0.957797	1.31489	1.00623	0.749988
2.02998	1.25818	1.00495	1.13062	1.55905
0.797812	0.866393	1.11402	1.0118	2.00705
1.35353	0.936451	0.794692	0.705562	1.99503
0.909545	1.2364	0.896331	1.1176	1.50473
0.696869	1.54336	1.59958	2.3976	2.55523
0.973265	0.958615	0.948697	0.729047	1.47671
1.00202	1.15737	1.17422	1.13898	0.894883
0.959777	1.06904	1.14023	0.714482	1.2194
0.57727	1.31403	2.9482	0.871838	0.69528
0.470614	0.796772	0.114755	0.981907	0.577571
0.511383	0.670785	1.0055	0.605204	0.83704
0.72698	0.860393	0.979277	1.30535	0.75089
0.550233	1.87745	1.72903	0.779844	0.653446
0.777481	0.990654	1.97167	0.73584	0.1804
0.99252	0.847183	0.506217	1.69538	0.853639
0.597436	0.989559	1.48752	1.56703	0.873128
1.49429	0.996172	1.43669	1.59498	0.722313
1.21259	0.302807	0.800745	1.18844	3.54012
0.812723	2.07893	1.40387	1.30794	1.19512
1.45627	1.40932	4.25666	0.75508	0.391071
1.08792	0.529422	2.48581	2.17298	3.05727
1.5577	0.70755	2.76828	1.54103	1.52027
1.136	1.43267	1.22685	0.960199	2.11954
2.27935	0.758061	1.22656	1.60597	1.8027
1.40235	0.729108	0.460553	3.84872	0.493027
0.620914	0.875933	1.37584	1.02907	0.576346
0.902509	0.728334	1.17389	1.83689	1.29789
1.03432	1.01049	2.94318	2.86372	0.884007
0.646146	0.526654	1.04871	0.665236	1.0834
0.909311	0.639343	3.7439	1.19684	1.10177
1.38925	1.24822	1.5081	1.56089	1.54653
0.483489	1.15398	1.19994	0.711062	0.925238
0.534366	0.654406	1.55141	0.32173	1.02033
0.630635	0.893175	0.99271	1.25793	1.58129
0.780131	0.725116	1.56142	0.808908	0.367444
1.55538	0.789891	1.6355	1.28142	0.627955
1.38262	0.510364	1.70677	0.678214	1.38194
1.54793	0.56799	1.64384	1.33521	0.896767
0.506164	0.677392	1.86143	2.58001	2.66419
1.62131	0.859249	3.12782	1.40241	0.592663
0.654389	0.709511	3.6832	1.59254	0.358577
1.43841	0.579658	0.8972	0.555205	1.74147
0.678092	1.44921	3.88014	1.48473	2.36671
1.00095	0.750616	2.76821	1.38835	0.964557
0.303462	1.06106	1.11775	0.427465	0.93256
0.775269	0.682587	0.554388	0.429586	1.55491
1.6335	1.33984	2.97207	1.54474	1.40514
1.24037	1.4038	1.60192	0.98284	0.824609
1.17857	1.30805	1.01502	0.544275	0.650555
0.552035	0.607866	2.37233	0.988139	2.38894
0.793941	1.21975	1.79417	1.35971	0.518652
1.53607	1.42549	0.614422	0.739912	1.10261
0.972921	0.632012	0.870194	1.9276	1.72242
2.11273	1.3316	0.816788	1.02712	1.41722
1.05475	0.41578	1.60914	0.883769	0.886449
1.24928	1.32916	1.08037	1.20084	1.82526
0.597374	0.981566	0.574534	1.00892	0.714683
0.697591	0.75503	1.51317	1.22116	0.660282
1.17726	0.57741	0.609259	1.1158	1.89678
0.834386	0.421414	0.514378	2.75149	0.898302
1.00618	1.13375	1.82646	0.993809	0.449863
0.928996	0.724208	1.3919	1.071	0.744556
0.522437	0.979772	0.784929	1.23354	1.78314
0.676162	1.72314	4.75363	0.785468	1.99835
0.715721	0.597362	4.0413	1.55347	1.78096
0.747805	0.886169	1.32696	0.684592	1.27326
0.665787	0.851158	3.7171	0.774741	1.30456
0.604419	1.38861	2.83011	1.32716	0.296739
0.759939	1.87017	2.49274	1.04326	1.37283
0.93043	0.867087	1.06361	1.37414	1.58104
1.53426	1.04719	0.518096	1.44901	1.31411
0.569557	0.913484	1.31526	1.97965	0.908551
0.624134	0.600966	1.45334	3.42729	0.477481
1.69909	1.40881	4.03721	2.94841	2.70916
0.916961	0.947333	1.42729	1.16352	2.10643
0.940751	1.57543	0.510774	0.694815	0.4167
0.677396	0.682483	1.01923	1.14	1.55759
1.28908	0.664618	2.69362	1.02214	0.691914
0.510157	1.22603	0.893363	0.678604	1.77591
0.685098	1.01623	1.7258	2.20173	0.60226
1.53204	0.743807	1.45299	1.21777	1.54156
0.534949	1.20977	2.06376	1.48671	0.953981
1.41908	0.712606	1.00346	1.68107	1.60006
1.36176	1.0968	2.37913	0.779598	2.70332
1.08429	0.721942	1.97316	0.985547	0.283807
1.61791	2.04937	0.760624	0.760877	0.90699
0.38897	0.537697	0.365191	1.85721	10.4274
0.421311	1.01883	0.564979	0.732839	0.522353
0.579132	1.10066	1.28373	1.11255	1.67222
0.947104	1.43883	1.55982	0.850903	0.891046
0.810808	0.535199	1.83792	1.55138	0.878785
0.52598	0.897209	0.410159	1.7167	1.97722
0.68549	0.825154	1.24134	1.754	0.659726
0.997253	0.836705	1.54195	0.770727	0.58635
2.88103	1.09543	0.551165	0.833868	2.47111
0.951914	0.691977	1.16729	1.46863	0.602603
2.95224	0.970078	0.804428	0.99109	0.984458
0.913746	1.21716	1.18287	3.98111	1.20974
2.18138	1.1118	1.12894	1.87762	0.708599
0.644958	0.819985	0.838625	0.8952	0.932279
0.831442	0.964442	2.21592	0.5646	0.771716
1.92565	1.01233	1.8073	2.36843	2.6247
1.22443	0.612859	1.41511	0.811138	0.905805
1.23982	1.02387	3.10818	0.807341	0.880913
0.509805	0.494619	0.302975	0.697874	0.80328
0.784625	0.706895	1.10136	1.53742	0.562602
0.513192	0.472452	1.47154	2.35737	1.0788
0.605271	0.62978	1.06317	1.88486	0.760298
0.934316	0.671416	0.289883	1.53106	1.50058
1.49931	0.764467	1.59969	1.16436	0.414059
0.654268	1.00873	1.45037	0.708215	0.911169
0.367401	0.697947	0.527955	1.94836	0.277682
0.796019	1.46005	1.11928	0.595478	0.708591
1.06927	1.64228	0.527408	0.930149	0.409334
0.440493	0.787182	0.887789	2.3978	1.35479
1.12415	0.191575	0.60954	0.789161	1.45109
0.517985	0.653355	0.285687	0.744469	2.00881
1.3776	0.565912	0.640515	0.725137	1.49224
2.17888	0.556393	1.62594	0.844187	1.79671
0.686522	0.707777	0.830544	0.97817	0.984732
0.967928	0.731969	0.25797	0.480098	0.913721
0.563766	0.697432	0.420247	1.55947	1.45996
1.50968	1.10112	0.708358	0.53948	1.02803
1.58615	0.684135	0.499103	1.17678	1.01286
0.485082	0.826903	1.24583	1.04426	0.58349
0.358106	0.990829	0.88506	0.278747	0.407138
0.861917	0.83659	0.631862	1.88527	1.27085
1.0991	0.307536	0.403387	0.50083	0.931097
3.76775	0.907659	0.621308	1.46513	0.699065
2.4197	0.742569	1.04763	0.372135	0.533572
0.372674	0.964314	0.4097	0.88086	2.65602
0.999071	0.866901	0.702568	1.19408	1.01231
1.46591	0.750337	0.312974	1.46703	2.80063
[truncated: 3,158 more rows]
