# Supplementary material for: Live-cell imaging in human colonic monolayers reveals ERK waves limit the stem cell compartment to maintain epithelial homeostasis
Source: eLife. 2022 Sep 12;11:e78837. doi: 10.7554/eLife.78837 (PMC9499537; doi:10.7554/eLife.78837)
Supplement: Figure 6—source data 5. [file elife-78837-fig6-data5.xls]

## Sheet: Figure 6G
DMSO-Lgr5	MEKi-Lgr5	PMA-Lgr5
441048	4940000	387490
808096	12800000	2200000
625444	4040000	2790000
1080000	33600000	1290000
1110000	21600000	1330000
1290000	15300000	1190000
1130000	18600000	1610000
1160000	14900000	1480000
792059	6940000	2150000
1010000	31700000	1800000
713395	71800000	2130000
1220000	2130000	8150000
1070000	13900000	8350000
995611	3970000	2170000
1010000	4910000	1150000
430189	24500000	1440000
953610	12900000	1040000
648448	64500000	1590000
1290000	1830000	1620000
392213	59100000	1140000
1140000	20000000	2820000
2680000	10400000	4350000
736430	48300000	1150000
985966	12200000	4990000
878996	5440000	1270000
1070000	11400000	1490000
403964	2590000	1490000
995891	2790000	1270000
862695	4290000	1180000
1220000	6440000	1290000
820326	29900000	1380000
874911	4880000	1510000
991619	9690000	1150000
1250000	3670000	2120000
745850	14100000	295966
313401	17100000	1240000
924749	6460000	1280000
1150000	6250000	1240000
618215	14300000	1370000
1060000	9300000	229895
1120000	32600000	1250000
2010000	6320000	2520000
1020000	9380000	465881
718005	7440000	1510000
385733	5090000	1280000
593891	23700000	1210000
1100000	4480000	937034
905931	6990000	1170000
866200	9390000	1740000
969897	9610000	2710000
543706	8600000	164644
1220000	9420000	232669
1210000	4760000	292395
427053	6530000	1490000
1280000	5610000	2130000
963643	5260000	1160000
1720000	13100000	2340000
1020000	5190000	1270000
1240000	6720000	392285
813569	2780000	1020000
1720000	17500000	2030000
1210000	4430000	235913
1170000	4180000	1350000
1090000	11200000	1250000
1100000	17500000	1120000
1620000	4630000	2980000
1760000	7940000	1100000
1360000	12000000	1300000
1090000	7360000	1240000
958275	4320000	1530000
982041	4840000	1120000
664375	9070000	978843
548258	3870000	2600000
729694	4760000	1010000
456442	6670000	2490000
335871	5400000	1420000
1070000	11600000	1070000
785086	4170000	812223
1740000	5770000	328986
896689	8350000	2540000
2020000	5720000	1170000
1060000	12600000	1110000
1140000	4140000	2420000
1020000	18100000	1240000
913562	3920000	183500
1430000	6030000	4130000
402735	5000000	1240000
1050000	8320000	712231
891422	9140000	1040000
1980000	7350000	2750000
789320	15300000	452361
407997	10800000	281427
1210000	5770000	990894
3180000	11200000	192404
2440000	5230000	1000000
949880	4870000	1560000
1150000	7760000	523332
1070000	34900000	163040
1620000	4260000	118669
1100000	5890000	1140000
962008	6490000	1210000
954031	25200000	176879
4670000	12900000	328290
938840	12400000	1340000
2460000	8320000	156288
1670000	4170000	1660000
787109	4480000	1190000
240256	7360000	1890000
809832	13600000	2450000
771955	24200000	381680
769742	9850000	385229
1340000	11200000	192913
998534	5430000	2840000
1160000	9490000	1210000
975889	10300000	337271
947979	6790000	280232
828229	7240000	1810000
932694	13400000	963460
1450000	29700000	485247
781535	8080000	156689
923742	2090000	1340000
3100000	7080000	2070000
994980	20300000	448297
925784	10900000	1930000
1120000	3210000	700312
251286	9750000	1150000
988967	129739	233363
866873	7940000	1110000
907039	11200000	982009
1240000	4840000	419336
2150000	596487	341003
987112	41500000	1320000
930026	4540000	867948
1220000	16300000	1070000
973617	4200000	2300000
767679	5210000	1490000
495985	4470000	883446
2660000	10600000	1450000
1010000	9460000	1530000
1580000	8920000	2580000
915200	23800000	1710000
1050000	11500000	187357
1200000	6090000	1800000
1080000	19800000	1270000
792768	10400000	1360000
1850000	16900000	1030000
826653	5220000	2050000
816601	5470000	1420000
821008	5960000	1020000
1360000	16600000	1020000
1120000	13400000	1210000
896332	14600000	528986
854055	84300000	453955
913757	3420000	1820000
450585	49800000	928287
1230000	4500000	1060000
1740000	56100000	1210000
1080000	34800000	790687
1020000	8750000	1250000
951334	6910000	1310000
1040000	77500000	1580000
778781	7120000	563403
960386	9410000	3380000
492938	69300000	1070000
1090000	7820000	2070000
842578	22100000	2280000
834772	6660000	1060000
946704	7220000	381608
1820000	6820000	293601
322719	11800000	629070
919339	2640000	951275
807421	18800000	179106
608266	12000000	1070000
928011	6890000	255987
732934	3520000	1130000
2260000	17000000	1900000
1190000	46300000	761806
2000000	3830000	97874
778436	10400000	833516
1040000	10200000	1220000
1070000	4240000	1690000
893552	9650000	962871
1690000	4790000	990433
1100000	4720000	1270000
1090000	42400000	904738
1030000	6500000	544244
928273	29700000	1500000
991241	24200000	1980000
821036	5330000	1540000
860795	18000000	497166
975615	9320000	1500000
1050000	3980000	1990000
724218	17600000	1330000
867089	25000000	2150000
1010000	4840000	1420000
971343	31400000	927419
1000000	17700000	453538
1650000	5020000	1070000
887408	29700000	924492
1100000	9470000	211367
980912	8740000	1340000
490308	9550000	1220000
937860	10600000	949003
874357	7540000	1220000
552981	4960000	928455
558715	41400000	2020000
1480000	3210000	1630000
2740000	3530000	1470000
544824	28800000	1190000
1150000	6770000	1550000
1230000	6710000	1770000
1050000	16700000	935934
1040000	19200000	351792
908539	8580000	977729
1110000	20900000	366176
989331	57100000	755243
2170000	50900000	882936
915346	12300000	1100000
996522	9800000	1160000
961095	12500000	1570000
1130000	10700000	774018
953867	11600000	1620000
1090000	3750000	870881
904067	4410000	922510
1120000	4850000	1050000
947672	21400000	325909
1190000	15600000	460291
1110000	15900000	1170000
1030000	18200000	1420000
2720000	6060000	1070000
1350000	9340000	1380000
1070000	16000000	438636
1170000	8440000	1270000
711942	6310000	3590000
3820000	3080000	1410000
2620000	10700000	519863
703203	21700000	895240
962645	16600000	1890000
720422	21200000	999599
697994	21400000	62582
1750000	31500000	1570000
957404	6550000	970490
1670000	8690000	1220000
1090000	3000000	1380000
445874	9560000	298840
195224	9200000	664944
858569	23400000	675861
778285	2870000	1320000
833351	7060000	1210000
1220000	5970000	508316
1180000	5480000	1090000
863669	22500000	231986
1740000	9060000	1920000
887887	9110000	1750000
928137	11200000	1360000
858308	4270000	227455
1210000	16800000	2870000
2780000	6400000	855748
961141	8400000	1890000
1050000	16700000	1190000
4860000	13200000	582535
974123	27800000	671866
936588	5860000	195049
959112	4730000	1210000
951829	10500000	267520
888171	10400000	923655
2170000	8470000	1260000
2500000	13100000	1020000
1260000	8320000	960390
683231	12400000	1200000
952287	21500000	971470
340538	7890000	1050000
850939	8430000	873721
1770000	9020000	759101
739568	19800000	99998
1170000	11500000	207746
836338	8380000	566642
1120000	9750000	1110000
819436	8490000	41780
437870	5520000	2940000
1430000	16500000	1510000
1070000	5910000	118481
796861	14200000	729664
848715	8670000	103762
925564	4210000	1470000
1040000	7080000	1270000
733800	11300000	552023
918240	13500000	395827
913631	18700000	286667
824139	12600000	703842
1900000	12300000	1290000
848446	26500000	1020000
822753	11900000	1760000
918588	19900000	484795
1080000	14300000	431390
978464	2480000	112755
1020000	21900000	568658
842407	14800000	258149
902285	15600000	276512
1070000	34700000	688813
1480000	7440000	1250000
712700	6490000	191353
2390000	4820000	533949
1900000	6480000	934279
897278	4610000	1730000
1090000	3840000	987663
876649	3780000	1590000
1040000	7710000	1510000
987675	6250000	365926
888327	5500000	579662
1040000	8820000	1140000
1050000	3890000	546238
1780000	4290000	1530000
727550	4110000	1600000
820764	3940000	1070000
1490000	4050000	2230000
778508	12100000	1910000
1030000	3590000	518579
882584	13900000	1710000
1140000	6050000	977774
1680000	9170000	326126
2820000	5410000	971562
1050000	2440000	963514
975727	16000000	344976
1020000	3770000	1560000
1100000	4390000	132829
1720000	4730000	976753
906528	5260000	770610
1170000	5360000	1020000
1140000	2410000	976573
913433	6020000	831026
941827	4380000	824440
792681	2920000	966957
944995	5230000	1500000
1030000	6450000	609097
830716	3400000	1010000
843172	4800000	1230000
1150000	3990000	1090000
896287	5580000	368481
762098	4440000	1210000
2120000	9160000	1070000
1170000	3550000	1800000
2000000	5790000	162300
1430000	1910000	1180000
966280	6210000	1540000
891620	4330000	207915
738467	3110000	1240000
986082	4980000	1060000
908118	4210000	1300000
858686	4320000	269245
1770000	4240000	1410000
1060000	3250000	1210000
1500000	4000000	1180000
1120000	3710000	980126
1010000	6670000	757306
862954	5700000	180019
1050000	7510000	478336
1180000	4990000	379720
1020000	4040000	664036
1010000	5040000	964563
2570000	9260000	41137
978126	5070000	1440000
872762	4200000	1080000
1080000	3880000	1530000
976145	12400000	843862
1450000	3190000	1350000
794209	3040000	337549
949004	14200000	1040000
831288	7470000	2110000
959221	5020000	727484
710317	4510000	735598
899958	4350000	717766
2440000	3470000	526354
1140000	7880000	291130
932524	4550000	916846
947302	6100000	812334
901627	14900000	752368
2320000	2490000	132523
1550000	3400000	442984
918049	3600000	816630
1160000	2740000	962976
392804	3710000	659183
776795	3430000	626602
2870000	4510000	1110000
1060000	2820000	422937
551589	3160000	150063
669984	5760000	3410000
455171	7620000	1040000
2510000	3110000	2330000
1040000	3910000	2190000
503189	7060000	326296
1070000	5570000	1300000
1360000	4120000	918090
1310000	4640000	2150000
2160000	3190000	996772
912491	4100000	1710000
2190000	3960000	1020000
773007	5040000	79818
1030000	3800000	2650000
981429	3180000	241661
1120000	3150000	477868
1200000	2070000	788603
1740000	3850000	858248
902543	9770000	1190000
902162	5200000	262611
969620	1980000	947403
947951	8000000	1190000
990966	4940000	900817
1060000	3410000	873654
859554	3250000	2020000
946171	3400000	174041
858535	3530000	921761
986429	4230000	1730000
1850000	2630000	493182
1020000	2660000	1120000
1120000	3880000	983964
851641	3050000	906329
861401	3960000	1290000
913646	3520000	1100000
930637	5010000	1660000
904050	2830000	1220000
1070000	10500000	1020000
950402	2890000	1060000
983040	3850000	1040000
1070000	5350000	925071
1030000	10800000	740192
896651	4710000	1130000
940514	3470000	998122
819769	3310000	495225
997838	2390000	1270000
969235	3190000	1240000
2450000	2210000	855506
737129	4900000	1730000
1670000	3350000	131991
2050000	3350000	1400000
2000000	3720000	2830000
1110000	3170000	609815
971376	3980000	261221
919499	4500000	632769
1180000	6160000	602287
967319	3100000	501230
2370000	4610000	1070000
947775	3620000	1170000
445862	3800000	1160000
897175	5070000	162031
986363	4510000	1930000
840993	3230000	1370000
838969	2500000	146260
1760000	5250000	320919
769143	4730000	1430000
953527	2610000	2390000
749129	5390000	832795
790660	3550000	134119
851583	2840000	516154
966971	2950000	790992
1010000	5560000	675023
952363	4990000	426554
725522	3270000	974876
1030000	2770000	178610
944966	5240000	947851
1060000	2850000	1050000
749927	2880000	1610000
834319	3560000	2230000
978700	3930000	1200000
1030000	4560000	660171
754188	7340000	693007
725847	2230000	173241
954663	2480000	831852
2590000	4570000	938085
413228	3830000	554707
841170	4180000	1070000
1680000	5440000	255655
897510	2840000	454352
2190000	2450000	287902
1210000	4970000	686311
2320000	6820000	247853
804159	4010000	1490000
819015	3670000	200104
1740000	4720000	1110000
815812	3100000	548477
979191	8390000	846674
1940000	2530000	1850000
1450000	3350000	1130000
1060000	4900000	1990000
1810000	4550000	1770000
1200000	2560000	1440000
997013	3310000	1470000
752100	3160000	237850
873034	3890000	436451
880163	3020000	378455
1240000	4410000	1030000
931596	5550000	716844
407296	3350000	841393
805158	4530000	2020000
386237	4820000	444159
852921	5160000	963435
926161	2470000	889583
859829	2370000	245353
645166	2360000	1400000
1000000	2700000	1020000
996002	3190000	651969
840367	8230000	391098
1240000	3470000	190962
725128	2670000	2410000
2100000	4210000	310585
2230000	2720000	825341
1000000	5780000	2180000
928069	9590000	2950000
901614	5210000	1560000
813125	3060000	1060000
429641	3560000	797119
825035	2880000	630118
1850000	4130000	1060000
607500	2320000	1440000
735443	7330000	543324
1050000	2750000	1520000
791323	3280000	2400000
934905	3200000	1260000
1040000	3180000	439543
941295	4390000	1850000
974818	3480000	529842
909978	2840000	624312
1530000	2970000	2060000
940177	2500000	418709
928823	7550000	819793
960491	2280000	267441
1620000	68300000	658837
800326	4470000	902097
2650000	5780000	295235
953241	2990000	974261
917615	5600000	816137
1080000	4210000	1110000
908343	9730000	769399
1010000	2670000	242632
934186	2960000	363416
979654	4410000	3810000
922758	3000000	2010000
1990000	3010000	1150000
4450000	7220000	796387
540883	3080000	342185
1560000	3210000	1220000
1720000	7620000	990004
799950	4430000	888649
855346	3130000	1110000
1320000	4180000	1120000
1160000	2200000	801932
1470000	2260000	533298
2110000	5500000	1060000
773692	6500000	2280000
565864	3070000	1580000
2010000	2200000	1030000
3490000	2650000	1060000
1020000	4930000	462974
883900	2890000	732228
688408	6820000	170418
504642	2990000	252733
530359	4360000	1070000
1110000	3230000	1890000
751142	3480000	49177
722684	2920000	1260000
983739	3430000	829922
932449	7110000	447089
1100000	2940000	547914
2690000	2440000	739469
1030000	6250000	685980
834417	3770000	280433
897562	3130000	325409
525869	3120000	1990000
740577	4050000	738119
989609	3770000	344873
964139	4540000	1250000
765259	4910000	1040000
867884	37000000	1280000
328307	3920000	973574
1070000	3650000	498049
1140000	3500000	1200000
310620	7870000	1010000
969535	4770000	976175
781821	4010000	1020000
831266	2710000	232504
1000000	4110000	1370000
494223	2720000	709999
417473	2810000	552745
1270000	25200000	196843
1370000	3040000	1390000
891772	3160000	957019
478954	3030000	882041
1130000	3110000	275583
868628	6070000	803019
913670	2710000	382902
945722	3650000	564282
1780000	3770000	2320000
192231	2950000	1260000
939553	3030000	167252
973313	3230000	1430000
1310000	3180000	631760
864956	4940000	950171
927385	6800000	959479
1120000	3320000	830042
890096	6580000	1480000
1010000	7040000	840070
889456	4360000	180233
871668	5690000	1610000
874395	9490000	640013
384730	5630000	809613
321389	4180000	523939
1120000	3730000	865183
821164	3310000	434760
2850000	3150000	852464
1090000	5470000	879437
310688	4340000	484282
860707	2880000	432969
1030000	11400000	647229
922724	2910000	954286
385210	4380000	1150000
710323	4650000	605362
1020000	13200000	230564
859487	4230000	656378
1170000	3220000	1190000
1060000	17800000	285838
926041	2560000	1030000
1170000	3310000	1730000
471001	8880000	833607
2240000	2870000	1130000
753384	4650000	752787
1700000	11100000	539889
842323	3580000	388804
1820000	4290000	309754
2750000	3370000	1900000
1020000	2590000	758420
1030000	4070000	1050000
1060000	11100000	1570000
1060000	3330000	279207
871993	5530000	157367
1810000	3150000	845122
1010000	14000000	1020000
971901	3090000	1640000
539838	3010000	1220000
1740000	4330000	1060000
428742	2240000	687625
638447	2420000	315282
280484	3260000	1320000
845094	6350000	1200000
893574	3330000	1010000
1520000	6660000	3130000
1040000	2060000	605698
1020000	3840000	530298
927021	6090000	47537
484314	4210000	1980000
2220000	5160000	516639
733633	3440000	665012
1600000	3060000	847803
900943	3420000	1240000
813009	4830000	111236
815095	2420000	1730000
933882	15700000	507826
264675	14100000	956299
823888	16200000	295416
909339	4330000	1040000
861343	4440000	2000000
405522	4510000	342473
928311	8930000	285885
915084	3110000	2140000
498675	3030000	477875
940308	3240000	959523
919626	7100000	1820000
930266	3290000	305116
398365	3120000	3050000
950201	8650000	604422
1900000	5920000	1110000
1420000	5170000	284700
2630000	4440000	46560
586649	5710000	838876
949615	5910000	1260000
914359	5080000	417267
725653	33700000	518673
898769	4510000	343738
788165	3460000	561640
839785	3500000	1660000
789166	4130000	1060000
905479	4290000	1300000
887401	9780000	934275
821936	5370000	309382
981645	3470000	517621
883575	1940000	2280000
1070000	1730000	1010000
942838	10800000	848483
1150000	3570000	2460000
367697	5390000	852890
688645	11500000	1180000
1130000	3230000	2470000
1970000	3010000	772216
1050000	9580000	54735
998961	7830000	939164
1730000	16000000	1030000
858990	8860000	228635
589356	5620000	1030000
4550000	4690000	910697
931595	8020000	1540000
1180000	3880000	1160000
943778	5060000	550931
1190000	4170000	1010000
872660	2390000	946966
3430000	4940000	1870000
1740000	26900000	1030000
1010000	25500000	1980000
815934	3510000	1170000
785450	3020000	2220000
446569	3340000	187458
441316	3230000	1450000
864914	7560000	656620
948751	3110000	327927
1640000	8830000	316855
1060000	3600000	890082
1940000	5390000	673918
902060	12300000	789076
939610	8430000	864680
940149	2530000	1220000
969538	2880000	1010000
1730000	6790000	819624
971682	6190000	1080000
2670000	5040000	1020000
3040000	4230000	1780000
1960000	3990000	1820000
794772	4030000	1190000
650775	4530000	333336
1010000	6390000	781029
956219	2620000	598513
2390000	2810000	831490
677028	17700000	2050000
1010000	5550000	508112
644346	6690000	495320
930202	2980000	1110000
860114	3950000	1070000
894989	2910000	127934
981995	3110000	1510000
1110000	3180000	300198
903528	7200000	1100000
970679	3560000	1220000
624976	10300000	500913
992772	3870000	1140000
973575	4130000	179154
1070000	3560000	858500
817613	4240000	1060000
999502	6870000	289791
864772	4630000	1450000
636558	7980000	191429
806550	3480000	2260000
976615	2630000	1020000
1330000	11500000	1150000
2300000	3240000	1110000
1950000	7030000	1230000
868566	4200000	680897
405176	5100000	1030000
798758	4760000	834176
811509	3040000	1050000
579464	2810000	796171
247937	3930000	1090000
3180000	2790000	586067
632895	5590000	2280000
949108	2100000	1250000
2870000	4500000	43421
946370	3250000	1490000
1030000	2210000	528913
768959	1130000	171669
1670000	3200000	889582
1560000	9560000	986681
711816	5000000	522527
1530000	15300000	424842
3910000	6290000	1150000
939292	1840000	1010000
1050000	2750000	908575
869009	8010000	199237
1010000	2790000	2460000
1010000	2380000	1640000
1030000	4400000	745481
829411	3170000	447865
744534	4260000	863050
1600000	3820000	276845
444496	3390000	406861
1080000	2200000	991861
1560000	4100000	627699
933547	3740000	297553
872984	4240000	772003
1300000	3670000	450293
1730000	3740000	341561
957036	4710000	561896
826518	5190000	790950
1110000	5080000	537796
464863	3070000	370348
967840	3340000	864016
953414	2470000	838963
913855	3730000	261332
1340000	7590000	1030000
409633	4420000	2980000
639417	5080000	1090000
977110	4160000	1170000
1480000	3830000	886064
505426	3400000	749550
955072	3110000	1040000
3950000	4290000	1100000
1480000	3770000	1010000
1090000	3970000	1120000
887021	4010000	993451
906331	4000000	1090000
798893	3340000	1190000
943668	4730000	439110
978648	4190000	1120000
932738	5550000	901589
893610	6280000	1160000
971363	5770000	784663
865750	2990000	940271
1040000	4150000	1920000
959967	2600000	902917
793600	4010000	1220000
1500000	3160000	633652
831736	3020000	204324
887693	4390000	1620000
2910000	2950000	1190000
1100000	4040000	1660000
887948	3080000	2070000
1470000	5460000	329553
1180000	4060000	273808
1280000	3040000	1040000
413995	3850000	1050000
926935	4800000	1140000
622098	5920000	438888
1480000	2870000	260751
1930000	4010000	2980000
1440000	3440000	254537
1050000	4120000	1110000
468730	2580000	905879
804908	6640000	593972
1280000	3660000	864334
649795	3770000	993893
828203	2900000	607980
2240000	2890000	2060000
956018	3210000	248899
510361	4110000	422311
1070000	8780000	1360000
857843	2530000	886580
334341	5150000	457928
822687	2960000	1860000
963743	3090000	1140000
1600000	3220000	1640000
949292	14300000	160511
1360000	5140000	864377
1070000	3050000	909814
557172	3810000	1090000
944070	3380000	1020000
627460	3450000	1290000
1070000	2970000	860134
1820000	3240000	1740000
320790	4880000	344053
1330000	2980000	409641
888322	3430000	988542
750628	3190000	569051
1050000	5940000	1140000
779746	3870000	1020000
717156	10000000	385146
396016	2990000	2600000
870539	3180000	1460000
1530000	3410000	709100
387858	4950000	387619
787183	3680000	656169
4380000	2060000	712604
1990000	3080000	532162
1650000	3010000	1010000
1680000	3700000	687436
438836	3920000	894957
754889	3220000	718514
917619	3350000	2200000
928164	3610000	277353
431850	3450000	868389
1090000	2420000	156280
980587	5950000	696622
840319	6220000	252405
966927	3360000	87722
851884	2280000	419878
4380000	3770000	972579
1660000	12700000	211634
1070000	3220000	812718
990605	1970000	544338
371573	1720000	1110000
1980000	2970000	1180000
602634	2960000	2040000
1850000	5350000	646916
1630000	3820000	560158
271836	6010000	1070000
1020000	4220000	450415
1920000	3090000	1270000
811779	3350000	949957
1060000	3790000	990537
447874	3410000	810994
783770	2180000	1200000
921481	4290000	489801
767852	2590000	1380000
898580	1730000	1220000
2450000	3810000	408492
923423	5590000	854056
919025	4020000	602827
1190000	2010000	2020000
2070000	4230000	2270000
989366	5380000	718678
3210000	3090000	259069
992755	3350000	370765
2130000	5100000	157060
963155	3120000	2350000
903522	2670000	258621
1860000	2080000	2290000
930997	1800000	2070000
905793	2480000	786461
929456	5690000	279959
926405	3270000	3080000
867437	2580000	457622
1050000	5390000	353891
351626	4330000	232153
465270	3140000	1830000
2180000	3100000	317495
924736	3280000	305308
483469	2380000	205874
881299	4950000	3380000
1780000	2190000	3100000
967354	3500000	1050000
2020000	3020000	384972
1010000	3210000	338760
1010000	3140000	459584
557894	3050000	390391
1140000	4420000	1090000
1380000	2510000	444491
874740	3210000	952468
961305	2880000	782668
958696	5820000	1950000
1070000	2140000	974718
1830000	3040000	245746
2530000	2540000	792371
1080000	3900000	1070000
894577	3000000	181766
864301	4420000	761411
1790000	3080000	951100
986003	8320000	415214
1650000	2720000	1630000
970218	2760000	871291
1040000	3220000	113832
988734	2620000	698090
377335	4620000	1120000
3490000	3250000	752699
1010000	3660000	1480000
975067	30600000	1050000
941329	2990000	1930000
1740000	4240000	1970000
956798	4920000	582096
911531	3180000	1400000
1850000	3020000	1260000
1090000	3060000	124799
3560000	3600000	212146
658191	2910000	433028
1020000	3220000	75602
487660	7380000	886417
430773	3410000	150439
1030000	2230000	665622
930606	4180000	761293
928304	3690000	828518
792492	1980000	280931
912662	2920000	953880
938873	3340000	777861
1420000	3090000	225978
350474	2900000	1090000
1410000	3970000	1070000
976586	3080000	962791
1070000	5640000	885139
924902	3290000	412756
2390000	3220000	1240000
1080000	2790000	1610000
778464	2810000	749923
345931	3890000	942718
1270000	3730000	776645
852613	3110000	157787
1070000	3240000	1780000
776656	2990000	959097
3760000	3020000	1070000
1730000	3660000	777252
586752	2380000	716776
443322	3190000	956060
912114	3890000	1540000
3230000	2930000	305062
954235	3190000	1600000
978062	3220000	367091
980792	3060000	264234
2880000	11000000	918081
1180000	2920000	1110000
507782	4640000	1790000
897822	3100000	3640000
1490000	4340000	287284
708967	3870000	384707
877363	2640000	1060000
1120000	2000000	675037
985757	6180000	788741
1010000	2750000	480264
897713	2970000	1160000
1560000	8060000	958964
753431	7350000	187147
1010000	2230000	854609
854244	4540000	785558
1190000	1860000	732549
817032	5120000	878728
832625	4390000	2270000
868959	4820000	954432
932861	2920000	697348
743792	2970000	1060000
817344	5220000	356891
942453	2310000	1750000
2080000	1820000	355862
948020	8270000	674877
859940	1800000	921555
815658	2100000	200335
746937	4350000	180263
883034	7780000	644406
873296	2640000	1080000
740706	4120000	219120
1080000	2990000	436669
771394	7740000	606677
934572	2920000	1020000
1100000	1890000	1260000
915954	1330000	719450
1150000	1320000	1100000
987330	1840000	216459
969281	5710000	1140000
3480000	6020000	810598
783515	2610000	946946
1280000	1850000	415745
2560000	5580000	165223
701224	8110000	595831
341641	5740000	1130000
946894	3220000	188418
788311	2800000	2710000
556302	4450000	921235
1330000	4120000	855395
3140000	4180000	415574
923587	4380000	835200
1150000	4250000	875634
911933	1750000	1930000
1300000	17000000	2480000
822348	19500000	351984
834944	10100000	332891
1790000	2610000	516127
1290000	2530000	737992
1100000	3080000	277102
941336	2590000	644003
1010000	2520000	261898
1070000	8180000	1600000
1000000	9030000	4440000
910536	1860000	794066
879968	2170000	743320
688585	4320000	1870000
899495	2430000	1820000
736046	8520000	365742
1150000	4250000	667095
1280000	5270000	1940000
287168	2100000	851317
941382	4780000	229986
1580000	2960000	730119
963465	2120000	493456
1080000	4070000	689088
530322	6860000	247121
1080000	2400000	346766
812309	3940000	232621
1890000	2450000	1200000
875574	6160000	1630000
967345	5430000	816918
1490000	3600000	1310000
962924	2610000	1360000
640178	2890000	156891
846327	3160000	901800
608940	3220000	931433
863452	2970000	209536
1800000	2600000	917408
958690	3320000	926627
690769	13900000	776414
977943	1970000	684968
844002	2180000	2030000
822513	5730000	598094
404014	2910000	898414
437210	8670000	2150000
825312	1730000	3950000
781368	5150000	974515
855682	2480000	764022
1020000	4120000	432546
1980000	1940000	856856
1090000	10400000	360453
893972	4360000	1010000
642922	6880000	697905
719235	2500000	945052
1040000	3260000	1120000
888154	2810000	812095
860721	4470000	962430
1000000	2440000	611107
1090000	5220000	833057
805666	2440000	1290000
1090000	1790000	687599
1370000	5250000	385486
840254	2950000	546585
1190000	1500000	972710
1340000	4420000	616725
928346	10600000	650946
826288	2820000	701086
964723	2330000	372334
958146	2900000	1160000
922019	3410000	1860000
2260000	5650000	2250000
743353	2010000	455474
1150000	2260000	1060000
833311	3900000	1890000
965014	2120000	1120000
830737	3110000	1080000
1270000	3200000	1890000
487729	1660000	416649
1120000	15600000	6340000
1180000	2410000	1890000
807681	2530000	1980000
826838	1980000	871454
895966	2040000	1450000
1900000	4730000	855699
1350000	2180000	2790000
987145	2070000	1830000
2050000	2130000	1320000
1970000	7280000	987525
1900000	4290000	807037
1820000	1650000	617775
660561	7870000	649398
942742	2480000	886487
774374	9240000	1980000
1360000	5930000	1980000
1020000	2450000	1110000
852270	3780000	823599
1780000	1870000	1930000
905816	4160000	1260000
2390000	2520000	1980000
2670000	2860000	1580000
850414	2790000	1470000
891035	4110000	238838
852331	6430000	1760000
1440000	4630000	1000000
1050000	1870000	1490000
615395	10600000	116525
992588	4400000	996519
1050000	2410000	1650000
1830000	2200000	223237
782720	10200000	1050000
898439	4410000	879794
941564	1740000	644795
1060000	9250000	812205
911284	3010000	383806
749266	9740000	455481
1110000	1690000	1420000
1060000	16300000	1050000
1040000	6370000	1260000
887316	1950000	684013
729767	2270000	1180000
1040000	3190000	1190000
864332	5120000	666150
928580	2660000	384330
1100000	2340000	428885
1060000	4620000	1100000
1680000	2740000	568240
2230000	1770000	1670000
747529	5760000	227958
1040000	1540000	468600
1540000	4570000	1200000
1590000	3280000	1060000
905143	1830000	1160000
901930	3540000	1020000
1060000	3520000	1120000
1030000	1710000	1180000
870653	5360000	1080000
575635	7470000	1010000
972443	6520000	1340000
953070	14700000	438530
2780000	1850000	407312
1060000	2770000	1100000
951808	3880000	1370000
974737	3520000	1240000
911522	4610000	574325
1050000	3740000	925669
374486	1880000	546191
674594	2120000	1190000
1030000	7970000	1170000
855291	4060000	1130000
949518	2540000	412724
2600000	5810000	1400000
1430000	2350000	1020000
871989	2890000	999336
2310000	8260000	1090000
1050000	1820000	1210000
898145	2520000	1440000
708555	1730000	1240000
1050000	6440000	2740000
2070000	3880000	998355
764023	2490000	999715
633125	2150000	1560000
1160000	1540000	1760000
915322	2380000	1030000
1120000	4320000	1060000
702445	1730000	408686
812715	3640000	960514
908243	3370000	380853
939669	3230000	528895
1070000	1830000	1050000
907056	2020000	551641
885081	6670000	1170000
506969	2760000	1160000
503812	1550000	320325
905052	4290000	1110000
1110000	2240000	379505
1070000	2850000	922328
861484	2360000	1160000
1120000	4670000	924045
2110000	4670000	892712
909441	9110000	1330000
427976	4700000	1230000
949439	6120000	531415
1960000	2720000	643848
1020000	2840000	2010000
993040	6230000	1030000
1150000	1570000	973073
888171	2340000	628112
867555	2770000	1140000
760493	1450000	474339
1050000	16900000	645253
1860000	4380000	1130000
788782	4220000	600913
649648	4150000	2000000
1260000	3140000	1080000
5210000	5160000	1030000
934011	5080000	1160000
917777	3500000	930728
2080000	1700000	587534
668085	2220000	1160000
784814	2230000	443867
810864	3230000	788588
956551	1750000	547549
908474	2980000	516993
739557	2780000	888620
1930000	2050000	1630000
1070000	5670000	505397
943893	4640000	503835
463915	2580000	308637
871853	5280000	876842
1040000	15700000	1070000
764580	1550000	669714
1890000	4090000	1140000
1030000	2430000	1190000
755750	2380000	963575
1680000	9380000	1030000
878041	5730000	1380000
989144	1880000	504130
906114	1180000	2350000
1330000	5750000	1230000
929379	2290000	1300000
1370000	2800000	552266
1100000	1470000	1070000
846634	2990000	798980
528275	1970000	915013
439064	2900000	1150000
870227	6250000	1150000
614929	1780000	956535
784020	1570000	997301
829019	2020000	1030000
704273	10200000	975806
4330000	1490000	2140000
668927	14400000	872361
880208	3150000	1010000
1780000	2160000	1510000
854929	1460000	899014
850978	13900000	1270000
384165	1520000	468700
835036	3890000	1070000
730552	2370000	472569
959054	14100000	1340000
911531	2270000	1200000
553105	4050000	1130000
418491	1440000	1260000
975159	6620000	1050000
966060	1450000	1230000
978390	1650000	842486
1350000	4030000	1150000
1370000	3270000	1210000
821921	1540000	1130000
888234	2620000	1080000
943750	5040000	1150000
340787	3220000	1440000
1060000	2330000	1140000
699600	2920000	1360000
1670000	3310000	588643
870301	3860000	1500000
737990	10100000	1220000
932104	5700000	1020000
907241	1900000	1080000
857884	9130000	1540000
778554	1960000	918071
1030000	6350000	544718
3730000	2580000	1170000
1420000	1810000	1050000
978828	1670000	890510
976761	2050000	928904
581796	3560000	1140000
933827	2360000	1130000
852316	2790000	766965
929525	6840000	1610000
1050000	1730000	1260000
904609	20000000	1080000
748709	10100000	896078
874571	1380000	1010000
781197	3370000	1140000
1750000	4020000	822323
929708	7030000	1040000
888560	4110000	1210000
1890000	8070000	1510000
1930000	2410000	1370000
813863	2810000	1170000
899670	1700000	952700
863093	1430000	1210000
878659	2740000	1080000
805709	3600000	608801
1670000	1570000	1270000
682531	1490000	1010000
942623	3910000	1040000
870540	1730000	935895
797482	9280000	1010000
931588	1640000	1620000
923185	1840000	546185
849371	2040000	1040000
717504	1990000	335746
1760000	3710000	873689
867791	1630000	889085
1010000	2230000	954185
803549	5530000	1020000
856829	2420000	1080000
946800	1630000	862894
5110000	1590000	458969
1120000	3030000	488933
775629	1870000	1020000
382217	1990000	469640
380642	2330000	1120000
952258	2770000	984077
989727	1960000	966852
472178	1770000	466651
939637	7610000	1280000
1940000	1830000	1020000
1020000	3150000	886921
808050	1650000	1130000
830075	3620000	1060000
999174	1490000	973060
922039	2370000	1870000
1100000	2330000	930663
1970000	1850000	408276
534895	3360000	566828
570500	1720000	992903
1540000	4910000	1100000
371730	13400000	867195
1100000	6450000	1070000
883276	6370000	794379
1530000	6300000	842470
378059	2340000	804252
702548	1670000	1310000
440883	10000000	1000000
1520000	2000000	971288
793494	1390000	951036
844409	1820000	1370000
990759	9050000	1090000
798198	4310000	1200000
823774	1770000	388447
938069	4580000	967766
1790000	1450000	1070000
846736	1550000	744517
932445	1620000	461857
826764	2040000	897350
497980	2540000	1020000
873646	1570000	943493
956424	2200000	996123
1010000	1820000	650692
561580	7500000	2180000
940257	6100000	863804
965502	1790000	1030000
807079	1450000	1010000
985062	1700000	1050000
2000000	1640000	988622
1470000	10700000	1060000
490543	2000000	1170000
479031	1390000	767112
674378	1660000	991197
1620000	2220000	1690000
657692	1450000	850853
895239	2250000	956914
2000000	1840000	1060000
3030000	2060000	672571
916880	3870000	984671
812854	22300000	999647
562911	1740000	946837
573426	1870000	1380000
1880000	2680000	932101
890222	13500000	522904
817168	1810000	971024
989300	1820000	963900
360288	1730000	940302
931367	3850000	920575
1580000	2630000	1790000
665351	2080000	1280000
877722	3570000	989552
862034	1560000	1660000
893963	3400000	490565
787979	1330000	1040000
2620000	2280000	989942
1520000	11800000	1060000
2200000	5900000	939707
824822	1870000	476385
1250000	1840000	1080000
1110000	5100000	1290000
696586	1660000	929172
871287	1620000	494395
781349	1440000	497275
518060	1460000	1170000
914091	3700000	2440000
5580000	1790000	1320000
646375	1450000	982195
843889	1770000	1110000
1040000	1630000	931015
907943	2670000	2020000
1120000	3150000	1020000
357848	1350000	1050000
1030000	3850000	899633
909812	1370000	637743
1060000	3260000	1170000
841110	1740000	956912
2580000	6040000	568044
836339	4540000	238014
826260	1540000	498280
3220000	1930000	1460000
828777	2370000	334403
2130000	1650000	1110000
3240000	8460000	906326
1110000	1620000	826286
1970000	2420000	763100
870414	1480000	987640
1110000	3570000	2220000
912105	5370000	360360
800172	2300000	1600000
1070000	1340000	1620000
816040	1390000	795599
1060000	1480000	393215
833456	1680000	886091
3990000	3520000	2210000
732989	1510000	1270000
919912	1420000	296008
735183	1790000	774198
865075	3410000	890117
917024	3250000	298479
424779	1380000	806353
894727	1550000	994013
1300000	1430000	1130000
1200000	1220000	786245
495892	1700000	461980
976843	1460000	984471
921254	7440000	1020000
2400000	5950000	401580
1070000	1690000	1050000
1460000	2300000	830962
487366	1540000	298398
479808	1240000	965143
1620000	1650000	1280000
943631	3700000	1030000
1260000	1570000	1890000
335789	1610000	1180000
507951	1840000	1000000
878425	1080000	1210000
2260000	1660000	487489
900766	1570000	902991
913898	1850000	952830
936142	1450000	1020000
713099	1700000	363086
1810000	1590000	950720
844621	4490000	640497
2800000	1850000	764493
2620000	1330000	1100000
955046	1470000	920070
1930000	1810000	1090000
1540000	4010000	1130000
2370000	2390000	798181
1130000	1360000	875141
1040000	1230000	1100000
1040000	1680000	1160000
1190000	1620000	990525
894794	3870000	944990
900710	1690000	921855
586728	2690000	935011
874164	1290000	595056
863259	1550000	604709
659264	3930000	1050000
2170000	1410000	758904
921450	3130000	616040
1030000	1650000	964187
489210	1620000	804599
1040000	1600000	980421
1260000	1530000	1060000
658112	1400000	1050000
751610	1450000	1090000
1160000	1600000	998134
1180000	3840000	2670000
1120000	1380000	1320000
329578	1650000	1160000
916721	3270000	981744
962620	1300000	2250000
1140000	1850000	1280000
3430000	2130000	911235
986022	2380000	862888
950735	2590000	950525
873872	1390000	842707
898836	1310000	942263
3340000	1460000	3300000
2850000	1640000	985202
1270000	9250000	1030000
984937	6120000	961474
236963	1810000	481170
832652	1390000	863247
4460000	1280000	250552
954855	1510000	1180000
919272	1230000	1040000
2690000	2020000	1080000
945194	1270000	1140000
2720000	1330000	1070000
712285	1710000	1000000
798574	1250000	1110000
305047	3840000	1110000
819157	2050000	1310000
1070000	1630000	981169
985301	1380000	910033
1250000	2420000	885367
1030000	5970000	954074
808259	1680000	1010000
1210000	1520000	2540000
683059	1440000	917503
1930000	2210000	892703
1350000	7280000	1130000
931614	1570000	1020000
1010000	1310000	1060000
3840000	1390000	1750000
809237	1640000	700927
1000000	1660000	870696
914804	1520000	1300000
1900000	1280000	962675
4080000	1370000	366563
2830000	1590000	548930
1040000	1800000	598333
2030000	5700000	1090000
476150	1440000	1210000
1140000	1200000	1210000
3970000	1870000	366842
1530000	1840000	1190000
924093	2120000	869516
1330000	1360000	780767
1070000	1130000	991338
845012	2400000	1080000
1130000	1210000	1030000
949196	1320000	362911
932327	1420000	1080000
1120000	1400000	997530
920302	2550000	970292
810214	2900000	1070000
795880	4600000	1010000
2750000	1940000	1090000
973618	1920000	1140000
866084	1450000	1140000
799535	2000000	980512
1060000	1270000	1160000
944484	1220000	859503
908048	1250000	1180000
1290000	1570000	1340000
1710000	2840000	956831
1070000	1720000	1170000
980685	2450000	923734
786888	1340000	846828
375870	1370000	1130000
503001	3330000	1110000
1470000	2230000	812279
651541	1090000	1800000
2610000	2100000	1050000
888795	1510000	964978
779287	1440000	871162
1010000	3930000	1840000
1140000	1440000	927720
892868	1430000	344303
1020000	1260000	955976
867640	2520000	773643
1930000	1270000	1020000
990247	2640000	963139
1320000	1400000	1290000
883917	1730000	628488
2820000	1280000	1010000
1170000	1970000	867269
856793	1610000	1020000
3360000	1550000	931356
2410000	1210000	2510000
1080000	1430000	1030000
882133	1250000	1020000
1580000	3790000	988497
1500000	1470000	1070000
880255	1530000	486369
1810000	1790000	575561
1040000	1290000	1140000
2730000	1390000	278223
534679	1310000	704834
991211	1350000	1060000
861484	1340000	1160000
723255	2540000	542936
1410000	1860000	1200000
553253	1220000	318007
698006	1260000	1430000
842499	1370000	1050000
355090	1910000	701615
798432	1220000	2130000
1320000	1340000	693358
572071	1370000	1100000
2970000	1900000	942193
803182	1230000	742897
2550000	1810000	530603
921467	2030000	309530
2040000	1290000	554353
3030000	1160000	1120000
3680000	1910000	585575
871275	1350000	553056
1300000	1380000	483359
863597	2490000	781245
897733	1450000	1120000
851965	1390000	467561
489009	1400000	348555
2370000	1350000	315031
884281	1170000	461939
787208	2360000	684247
1460000	2320000	518963
805955	1680000	529373
769363	2100000	1880000
1250000	2010000	441786
963080	1650000	1380000
877533	1530000	1020000
1040000	1460000	884247
917198	1500000	1430000
970442	3890000	342346
386164	1410000	1050000
814600	1350000	640231
1740000	1790000	1660000
353379	1230000	1080000
1340000	1450000	1060000
1740000	1730000	639326
1500000	1220000	681133
712215	1490000	1910000
1610000	1410000	1100000
1150000	1620000	948343
1580000	1820000	1270000
1090000	1540000	1330000
878085	1290000	4990000
795107	1440000	223793
778097	1410000	1990000
757070	1640000	769248
2160000	1850000	859652
1430000	5330000	812324
2620000	1650000	1300000
814146	3210000	435938
886575	1260000	1200000
771423	1380000	787075
6350000	1640000	1590000
738293	2150000	460950
817380	2380000	2290000
2200000	1980000	938986
923209	2120000	1320000
1870000	2200000	1100000
839618	1720000	1520000
735856	2140000	986831
3060000	1850000	315691
1260000	2560000	1140000
1720000	1500000	1150000
897151	4230000	1060000
873811	1470000	2100000
888442	2410000	399326
861981	1170000	762705
971415	2880000	473112
930252	1720000	522940
883591	1160000	400004
1870000	4560000	849400
1030000	1520000	1070000
982123	1540000	1070000
799455	2260000	1310000
1500000	1410000	1060000
1020000	4290000	296153
770879	4160000	942151
766741	1610000	989594
1740000	1380000	507333
3330000	1690000	845672
1130000	1700000	624877
1970000	1540000	1610000
859985	5560000	1070000
837735	1760000	323836
2890000	1420000	993614
1070000	1270000	998648
2950000	1580000	1030000
1270000	1900000	1120000
2120000	2570000	470182
729281	1390000	1290000
2000000	1810000	1100000
888524	1480000	748560
864094	1650000	1140000
930505	1290000	486596
840021	2770000	1310000
842560	8000000	1020000
861448	1580000	1230000
829925	1610000	1770000
837445	6600000	924264
798996	2100000	1690000
988428	922701	1140000
5090000	2120000	1070000
806726	1590000	1130000
938879	1900000	1190000
2290000	2660000	1670000
948263	5340000	1090000
846747	1220000	1030000
737655	1550000	334530
1540000	10200000	878111
739951	1350000	1100000
903773	1740000	1450000
763089	6340000	1040000
948106	2230000	507376
624255	3400000	1040000
1050000	2030000	1130000
646731	2150000	662860
636705	1420000	471920
419002	1220000	1020000
1130000	1560000	1570000
295533	1610000	1060000
1070000	2780000	1010000
2310000	1840000	1010000
867272	2130000	1140000
1410000	1780000	1120000
2060000	2100000	883145
702889	3040000	577876
738107	7360000	949060
858066	1630000	899999
942306	2650000	1080000
857478	1780000	400922
950304	1590000	1310000
972792	2490000	952975
847475	2350000	1220000
731139	1040000	1070000
934042	1600000	1210000
684081	3320000	1040000
1090000	4750000	2030000
931909	2480000	1270000
2440000	2350000	958031
1860000	1640000	417164
797162	2300000	1030000
837331	2390000	1020000
1290000	1330000	958674
842033	3660000	463123
873272	1390000	1030000
1210000	1710000	1060000
2160000	2900000	620997
1570000	1760000	1120000
1430000	1890000	970296
929618	1540000	491992
911893	1690000	851323
1210000	1790000	588403
605955	1820000	1490000
987190	6060000	512978
1160000	2950000	885838
1370000	2680000	528239
2810000	1740000	1020000
899149	1790000	898771
449559	1780000	626891
2050000	1260000	2480000
944261	1630000	1080000
850339	1540000	1850000
2170000	1770000	1020000
535629	1300000	1100000
1100000	1090000	810838
508978	1310000	932792
436774	1700000	1080000
911973	1920000	2270000
1830000	1640000	888828
897596	3040000	3710000
749630	3110000	1210000
910409	2070000	1410000
2940000	1500000	638850
808449	4080000	1090000
846459	1340000	1100000
860675	2740000	902739
1110000	3410000	1580000
903837	1730000	480694
2440000	3270000	1070000
803813	9790000	1000000
873315	1400000	496391
1940000	6510000	519609
529103	1480000	897483
1860000	4510000	329695
1350000	1850000	1080000
965047	2380000	377772
2060000	1330000	869298
1020000	1560000	1080000
958132	2830000	528134
2190000	5590000	1260000
1000000	1880000	544815
884686	3770000	942532
1920000	2150000	269133
699999	3570000	355153
938772	2630000	1330000
767801	3860000	502277
819801	2460000	901908
739674	1570000	1110000
747693	2010000	1030000
956606	1920000	702242
1210000	2000000	581576
884815	1620000	1110000
1740000	4680000	1140000
340078	1330000	1060000
865203	1260000	1650000
788169	5380000	1120000
1150000	3340000	1820000
1190000	2120000	1060000
1780000	1470000	285086
1950000	2720000	886029
855963	1510000	1080000
595875	2360000	1180000
755786	1530000	997069
894913	3100000	1060000
1030000	1690000	1140000
812389	3290000	1060000
829083	1480000	726396
768078	1160000	787866
913221	7140000	1030000
1690000	1570000	473472
1050000	1740000	851913
891931	2540000	1230000
883815	3130000	377277
1680000	1590000	952989
1460000	1400000	1950000
1560000	2270000	1080000
1540000	2540000	564005
836999	2520000	1300000
1200000	1430000	850632
828356	1900000	1380000
907925	1880000	1010000
877324	4960000	309438
1210000	2370000	1030000
2510000	1140000	974851
699815	1940000	1190000
978826	2080000	1010000
900180	4390000	1020000
844288	2330000	655969
874899	4680000	696275
1400000	2860000	280798
831086	1550000	1310000
812100	1240000	1260000
1040000	4760000	1000000
1330000	1010000	352211
907562	2230000	1180000
1900000	1120000	1050000
969562	1860000	1020000
1320000	1280000	1200000
761617	2040000	467023
843537	1240000	1640000
790815	1380000	863524
879845	3190000	404785
799270	3780000	421425
1150000	1870000	1120000
1090000	1800000	1030000
2600000	1480000	965323
2620000	6440000	376337
863139	1630000	671724
1030000	2690000	469115
984333	2560000	466839
354117	1690000	984517
716465	2650000	680798
755363	1410000	189019
849904	1710000	599550
1070000	1790000	680308
1020000	1650000	352110
855649	1530000	984286
1030000	1900000	1040000
824848	1480000	5360000
894787	10900000	916312
896287	1780000	562446
382253	1330000	810982
830093	2300000	665350
740893	2500000	1140000
1360000	2080000	495534
907491	1510000	562438
1250000	6400000	1530000
837508	1240000	398458
1220000	2480000	946630
944026	1690000	1050000
854868	3280000	829677
802165	1450000	437193
1880000	4130000	1230000
518575	3060000	974165
929371	1790000	1070000
845592	1350000	792248
811125	5920000	1010000
854274	1880000	1130000
835659	1730000	1100000
858710	1970000	1120000
573236	4200000	581765
350716	3440000	928961
621022	2610000	1160000
2360000	4320000	486953
893004	1320000	1080000
852445	2780000	858393
795566	1580000	1020000
769043	5160000	329330
294947	5230000	430835
801810	3300000	697352
837058	1480000	394712
255217	1610000	915597
742295	1610000	2500000
811964	1230000	810778
5110000	1500000	910469
392003	2420000	384161
2450000	1240000	489396
3420000	1590000	1070000
995466	1950000	974690
888592	1650000	1040000
815558	1300000	996781
644004	2930000	951684
782358	1680000	752093
999571	7610000	911361
983583	2850000	1130000
2180000	1810000	1020000
784517	1410000	982038
873283	3470000	1100000
1580000	1140000	715780
422077	4130000	936256
523089	1760000	525111
920074	2320000	394592
797287	1760000	1060000
358333	4830000	626527
1370000	1430000	1140000
1910000	1480000	1210000
745748	2520000	2770000
722359	1690000	1130000
352696	4570000	764714
356170	2700000	964582
976182	2030000	906953
783711	6430000	589727
917112	3510000	856417
798988	2660000	1970000
1170000	1210000	1110000
875445	1380000	1030000
840358	1580000	310478
707512	1770000	327839
818353	2350000	1140000
1100000	1770000	1100000
830292	1660000	451678
754076	1400000	793851
832852	4640000	1030000
1440000	2390000	840452
823018	5410000	642884
2050000	1960000	1040000
2500000	1310000	321533
3630000	1910000	1120000
899364	1540000	908357
665565	1680000	895364
492097	1270000	900036
931165	2490000	454833
1190000	1480000	937696
801998	1480000	965058
890165	1580000	395166
853970	1460000	1210000
960757	2080000	1160000
819804	2450000	278322
775791	1650000	1350000
987462	4590000	935109
3860000	5160000	1120000
527505	1920000	1150000
408171	1510000	1120000
912911	5560000	953483
1890000	1840000	4030000
959625	1530000	879436
773224	1910000	664264
836773	1490000	1000000
965709	1720000	1100000
797067	2010000	796493
855327	1440000	423115
930719	1940000	1010000
1560000	2160000	613492
815848	1130000	868027
1410000	1260000	911188
942542	3580000	555534
916777	1400000	284476
1180000	3970000	814424
653389	2350000	1250000
805260	1490000	789685
947972	2150000	256573
1800000	1600000	1070000
[truncated: 9,282 more rows]
