# Supplementary material for: Live-cell imaging in human colonic monolayers reveals ERK waves limit the stem cell compartment to maintain epithelial homeostasis
Source: eLife. 2022 Sep 12;11:e78837. doi: 10.7554/eLife.78837 (PMC9499537; doi:10.7554/eLife.78837)
Supplement: Supplementary file 1. [file elife-78837-supp1.xlsx]

## Sheet: Sheet1
Lgr5 mRNA Probe
AUggACACCUCCCggCUCggUgUgCUCCUgUCCUUgCCUgUgCUgCUgCAgCUggCgACCgggggCAgCUCUCCCAggUCUggUgUgUUgCUgAggggCUgCCCCACACACUgUCAUUgCgAgCC
CgA CggCAggAUgUUgCUCAgggUggACUgCUCCgACCUggggCUCUCggAgCUgCCUUCCAACCUCAgCgUCUUCACCU
CCUACCUAgACCUCAgUAUgAACAACAUCAgUCAgCUgCUCCCgAAUCCCCUgCCCAgUCUCCgCUUCCUggAggAgUUACgUCUUgCgggAAACgCUCUgACAUACAUUCCCAAgggAgCAUUC ACU ggCCUUUACAgUCUUAAAgUUCUUAUgCUgCAgAAUAAUCAgCUAAgACACgUACCCACAgAAgCUCUgCAgAA
UUUgCgAAgCCUUCAAUCCCUgCgUCUggAUgCUAACCACAUCAgCUAUgUgCCCCCAAgCUgUUUCAgUggCCUgCAUUCCCUgAggCACCUgUggCUggAUgACAAUgCgUUAACAgAAAUCC CCg UCCAggCUUUUAgAAgUUUAUCggCAUUgCAAgCCAUgACCUUggCCCUgAACAAAAUACACCACAUACCAgAC
UAUgCCUUUggAAACCUCUCCAgCUUggUAgUUCUACAUCUCCAUAACAAUAgAAUCCACUCCCUgggAAAgAAAUgCUUUgAUgggCUCCACAgCCUAgAgACUUUAgAUUUAAAUUACAAUAA CCU UgAUgAAUUCCCCACUgCAAUUAggACACUCUCCAACCUUAAAgAACUACAUUUCUAUgACAAUCCCAUCCA
gUUUgUUgggAgAUCUgCUUUUCAACAUUUACCUgAACUAAgAACACUgACUCUgAAUggUgCCUCACAAAUAACUgAAUUUCCUgAUUUAACUggAACUgCAAACCUggAgAgUCUgACUUUAA CUg gAgCACAgAUCUCAUCUCUUCCUCAAACCgUCUgCAAUCAgUUACCUAAUCUCCAAgUgCUAgAUCUgUCUUA
CAACCUAUUAgAAgAUUUACCCAgUUUUUCAgUCUgCCAAAAgCUUCAgAAAAUUgACCUAAgACAUAAUgAAAUCUACgAAAUUAAAgUUgACACUUUCCAgCAgUUgCUUAgCCUCCgAUCgC UgA AUUUggCUUggAACAAAAUUgCUAUUAUUCACCCCAAUgCAUUUUCCACUUUgCCAUCCCUAAUAAAgCUgg
ACCUAUCgUCCAACCUCCUgUCgUCUUUUCCUAUAACUgggUUACAUggUUUAACUCACUUAAAAUUAACAggAAAUCAUgCCUUACAgAgCUUgAUAUCAUCUgAAAACUUUCCAgAACUCAAg gUU AUAgAAAUgCCUUAUgCUUACCAgUgCUgUgCAUUUggAgUgUgUgAgAAUgCCUAUAAgAUUUCUAAUCAAU
ggAAUAAAggUgACAACAgCAgUAUggACgACCUUCAUAAgAAAgAUgCUggAAUgUUUCAggCUCAAgAUgAACgUgACCUUgAAgAUUUCCUgCUUgACUUUgAggAAgACCUgAAAgCCCUU CAU UCAgUgCAgUgUUCACCUUCCCCAggCCCCUUCAAACCCUgUgAACACCUgCUUgAUggCUggCUgAUCAgAAUUg
gAgUgUggACCAUAgCAgUUCUggCACUUACUUgUAAUgCUUUggUgACUUCAACAgUUUUCAgAUCCCCUCUgUACAUUUCCCCCAUUAAACUgUUAAUUggggUCAUCgCAgCAgUgAACAUg CUC ACgggAgUCUCCAgUgCCgUgCUggCUggUgUggAUgCgUUCACUUUUggCAgCUUUgCACgACAUggUgCCUggU
gggAgAAUggggUUggUUgCCAUgUCAUUggUUUUUUgUCCAUUUUUgCUUCAgAAUCAUCUgUUUUCCUgCUUACUCUggCAgCCCUggAgCgUgggUUCUCUgUgAAAUAUUCUgCAAAAUUU gAA ACgAAAgCUCCAUUUUCUAgCCUgAAAgUAAUCAUUUUgCUCUgUgCCCUgCUggCCUUgACCAUggCCgCAgU
UCCCCUgCUgggUggCAgCAAgUAUggCgCCUCCCCUCUCUgCCUgCCUUUgCCUUUUggggAgCCCAgCACCAUgggCUACAUggUCgCUCUCAUCUUgCUCAAUUCCCUUUgCUUCCUCAUgA UgA CCAUUgCCUACACCAAgCUCUACUgCAAUUUggACAAgggAgACCUggAgAAUAUUUgggACUgCUCUAUggUA
AAACACAUUgCCCUgUUgCUCUUCACCAACUgCAUCCUAAACUgCCCUgUggCUUUCUUgUCCUUCUCCUCUUUAAUAAACCUUACAUUUAUCAgUCCUgAAgUAAUUAAgUUUAUCCUUCUggU ggU AgUCCCACUUCCUgCAUgUCUCAAUCCCCUUCUCUACAUCUUgUUCAAUCCUCACUUUAAggAggAUCUg
gUgAgCCUgAgAAAgCAAACCUACgUCUggACAAgAUCAAAACACCCAAgCUUgAUgUCAAUUAACUCUgAUgAUgUCgAAAAACAgUCCUgUgACUCAACUCAAgCCUUggUAACCUUUACCAg CUC CAgCAUCACUUAUgACCUgCCUCCCAgUUCCgUgCCAUCACCAgCUUAUCCAgUgACUgAgAgCUgCCAUCUU
UCCUCUgUggCAUUUgUCCCAUgUCUCUAA
MYC mRNA Probe
ggAgUUUAUUCAUAACgCgCUCUCCAAgUAUACgUggCAAUgCgUUgCUgggUUAUUUUAAUCAUUCUAggCAUCgUUUUCCUCCUUAUgCCUCUAUCAUUCCUCCCUAUCUACACUAACAUCCC
ACg CUCUgAACgCgCgCCCAUUAAUACCCUUCUUUCCUCCACUCUCCCUgggACUCUUgAUCAAAgCgCggCCC
UUUCCCCAgCCUUAgCgAggCgCCCUgCAgCCUggUACgCgCgUggCgUggCggUgggCgCgCAgUgCgUUCUCggUgUggAgggCAgCUgUUCCgCCUgCgAUgAUUUAUACUCACAggACAAg gAU gCggUUUgUCAAACAgUACUgCUACggAggAgCAgCAgAgAAAgggAgAgggUUUgAgAgggAgCAAAAgAAAAUggUAggC
gCgCgUAgUUAAUUCAUgCggCUCUCUUACUCUgUUUACAUCCUAgAgCUAgAgUgCUCggCUgCCCggCUgAgUCUCCUCCCCACCUUCCCCACCCUCCCCACCCUCCCCAUAAgCgCCCCUCC Cgg gUUCCCAAAgCAgAgggCgUgggggAAAAgAAAAAAgAUCCUCUCUCgCUAAUCUCCgCCCACCggCCCUUUA
UAAUgCgAgggUCUggACggCUgAggACCCCCgAgCUgUgCUgCUCgCggCCgCCACCgCCgggCCCCggCCgUCCCUggCUCCCCUCCUgCCUCgAgAAgggCAgggCUUCUCAgAggCUUggC ggg AAAAAgAACggAgggAgggAUCgCgCUgAgUAUAAAAgCCggUUUUCggggCUUUAUCUAACUCgCUgUAgUAAUUCCA
gCgAgAggCAgAgggAgCgAgCgggCggCCggCUAgggUggAAgAgCCgggCgAgCAgAgCUgCgCUgCgggCgUCCUgggAAgggAgAUCCggAgCgAAUAgggggCUUCgCCUCUggCCCAgC CCU CCCgCUgAUCCCCCAgCCAgCggUCCgCAACCCUUgCCgCAUCCACgAAACUUUgCCCAUAgCAgCgggCgggCACUUUgC
ACUggAACUUACAACACCCgAgCAAggACgCgACUCUCCCgACgCggggAggCUAUUCUgCCCAUUUggggACACUUCCCCgCCgCUgCCAggACCCgCUUCUCUgAAAggCUCUCCUUgCAgCU gCU UAgACgCUggAUUUUUUUCgggUAgUggAAAACCAgCAgCCUCCCgCgACgAUgCCCCUCAACgUUAgCUUCACC
AACAggAACUAUgACCUCgACUACgACUCggUgCAgCCgUAUUUCUACUgCgACgAggAggAgAACUUCUACCAgCAgCAgCAgCAgAgCgAgCUgCAgCCCCCggCgCCCAgCgAggAUAUCUg gAA gAAAUUCgAgCUgCUgCCCACCCCgCCCCUgUCCCCUAgCCgCCgCUCCgggCUCUgCUCgCCCUCCUACgUUgCg
gUCACACCCUUCUCCCUUCggggAgACAACgACggCggUggCgggAgCUUCUCCACggCCgACCAgCUggAgAUggUgACCgAgCUgCUgggAggAgACAUggUgAACCAgAgUUUCAUCUgCgA CCC ggACgACgAgACCUUCAUCAAAAACAUCAUCAUCCAggACUgUAUgUggAgCggCUUCUCggCCgCCgCCAAgCUCgU
CUCAgAgAAgCUggCCUCCUACCAggCUgCgCgCAAAgACAgCggCAgCCCgAACCCCgCCCgCggCCACAgCgUCUgCUCCACCUCCAgCUUgUACCUgCAggAUCUgAgCgCCgCCgCCUCAg AgU gCAUCgACCCCUCggUggUCUUCCCCUACCCUCUCAACgACAgCAgCUCgCCCAAgUCCUgCgCCUCgCAAgACU
CCAgCgCCUUCUCUCCgUCCUCggAUUCUCUgCUCUCCUCgACggAgUCCUCCCCgCAgggCAgCCCCgAgCCCCUggUgCUCCAUgAggAgACACCgCCCACCACCAgCAgCgACUCUgAggAg gAA CAAgAAgAUgAggAAgAAAUCgAUgUUgUUUCUgUggAAAAgAggCAggCUCCUggCAAAAggUCAgAgUCUggAUC
ACCUUCUgCUggAggCCACAgCAAACCUCCUCACAgCCCACUggUCCUCAAgAggUgCCACgUCUCCACACAUCAgCACAACUACgCAgCgCCUCCCUCCACUCggAAggACUAUCCUgCUgCCA AgA gggUCAAgUUggACAgUgUCAgAgUCCUgAgACAgAUCAgCAACAACCgAAAAUgCACCAgCCCCAggUCCUCgg
ACACCgAggAgAAUgUCAAgAggCgAACACACAACgUCUUggAgCgCCAgAggAggAACgAgCUAAAACggAgCUUUUUUgCCCUgCgUgACCAgAUCCCggAgUUggAAAACAAUgAAAAggCC CCC AAggUAgUUAUCCUUAAAAAAgCCACAgCAUACAUCCUgUCCgUCCAAgCAgAggAgCAAAAgCUCAUUUCUgAAgAg
gACUUgUUgCggAAACgACgAgAACAgUUgAAACACAAACUUgAACAgCUACggAACUCUUgUgCgUAAggAAAAgUAAggAAAACgAUUCCUUCUAACAgAAAUgUCCUgAgCAAUCACCUAUg AAC UUgUUUCAAAUgCAUgAUCAAAUgCAACCUCACAACCUUggCUgAgUCUUgAgACUgAAAgAUUUAgCCAUAAUg
UAAACUgCCUCAAAUUggACUUUgggCAUAAAAgAACUUUUUUAUgCUUACCAUCUUUUUUUUUUCUUUAACAgAUUUgUAUUUAAgAAUUgUUUUUAAAAAAUUUUAAgAUUUACACAAUgUUU CUC UgUAAAUAUUgCCAUUAAAUgUAAAUAACUUUAAUAAAACgUUUAUAgCAgUUACACAgAAUUUCAAUCC
UAgUAUAUAgUACCUAgUAUUAUAggUACUAUAAACCCUAAUUUUUUUUAUUUAAgUACAUUUUgCUUUUUAAAgUUgAUUUUUUUCUAUUgUUUUUAgAAAAAAUAAAAUAACUggCAAAUAUA UCA UUgAgCCAAAUCUUAAgUUgUgAAUgUUUUgUUUCgUUUCUUCCCCCUCCCAACCACCACCAUCCCUgUU
UgUUUUCAUCAAUUgCCCCUUCAgAgggUggUCUUAAgAAAggCAAgAgUUUUCCUCUgUUgAAAUgggUCUgggggCCUUAAggUCUUUAAgUUCUUggAggUUCUAAgAUgCUUCCUggAgAC UAU gAUAACAgCCAgAgUUgACAgUUAgAAggAAUggCAgAAggCAggUgAgAAggUgAgAggUAggCAAAggAgAUACAAgA
ggUCAAAggUAgCAgUUAAgUACACAAAgAggCAUAAggACUggggAgUUgggAggAAggUgAggAAgAAACUCCUgUUACUUUAgUUAACCAgUgCCAgUCCCCUgCUCACUCCAAACCCAggA AUU CUgCCCAgUUgAUggggACACggUgggAACCAgCUUCUgCUgCCUUCACAACCAggCgCCAgUCCUgUCCAUgggUUA
UCUCgCAAACCCCAgAggAUCUCUgggAggAAUgCUACUAUUAACCCUAUUUCACAAACAAggAAAUAgAAgAgCUCAAAgAggUUAUgUAACUUAUCUgUAgCCACgCAgAUAAUACAAAgCAg CAA UCUggACCCAUUCUgUUCAAAACACUUAACCCUUCgCUAUCAUgCCUUggUUCAUCUgggUCUAAUgUgCUgAg
AUCAAgAAggUUUAggACCUAAUggACAgACUCAAgUCAUAACAAUgCUAAgCUCUAUUUgUgUCCCAAgCACUCCUAAgCAUUUUAUCCCUAACUCUACAUCAACCCCAUgAAggAgAUACUgU UgA UUUCCCCAUAUUAgAAgUAgAgAgggAAgCUgAggCACACAAAgACUCAUCCACAUgCCCAAgAUUCACUgAUA
gggAAAAgUggAAgCgAgAUUUgAACCCAggCUgUUUACUCCUAACCUgUCCAAgCCACCUCUCAgACgACggUAggAAUCAgCUggCUgCUUgUgAgUACAggAgUUACAgUCCAgUgggUUAU gUU UUUUAAgUCUCAACAUCUAAgCCUggUCAggCAUCAgUUCCCCUUUUUUUgUgAUUUAUUUUgUUUUUAUUUUgU
UgUUCAUUgUUUAAUUUUUCCUUUUACAAUgAgAAggUCACCAUCUUgACUCCUACCUUAgCCAUUUgUUgAAUCAgACUCAUgACggCUCCUgggAAgAAgCCAgUUCAgAUCAUAAAAUAAAA CAU AUUUAUUCUUUgUCAUgggAgUCAUUAUUUUAgAAACUACAAACUCUCCUUgCUUCCAUCCUUUUUUACAU
ACUCAUgACACAUgCUCAUCCUgAgUCCUUgAAAAggUAUUUUUgAACAUgUgUAUUAAUUAUAAgCCUCUgAAAACCUAUggCCCAAACCAgAAAUgAUgUUgAUUAUAUAggUAAAUgAAggA UgC UAUUgCUgUUCUAAUUACCUCAUUgUCUCAgUCUCAAAgUAggUCUUCAgCUCCCUgUACUUUgggAUUUUAA
UCUACCACCACCCAUAAAUCAAUAAAUAAUUACUUUCUUUgA
KRT 20 mRNA Probe
gAgACACACUCUgCCCCAACCAUCCUgAAgCUACAggUgCUCCCUCCUggAAUCUCCAAUggAUUUCAgUCgCAgAAgCUUCCACAgAAgCCUgAgCUCCUCCUUgCAggCCCCUgUAgUCAgUA
CAg UgggCAUgCAgCgCCUCgggACgACACCCAgCgUUUAUgggggUgCUggAggCCggggCAUCCgCAUCUCCAACUC
CAgACACACggUgAACUAUgggAgCgAUCUCACAggCggCggggACCUgUUUgUUggCAAUgAgAAAAUggCCAUgCAgAACCUAAAUgACCgUCUAgCgAgCUACCUAgAAAAggUgCggACCC Ugg AgCAgUCCAACUCCAAACUUgAAgUgCAAAUCAAgCAgUggUACgAAACCAACgCCCCgAgggCUggUCgCgACUACAg
UgCAUAUUACAgACAAAUUgAAgAgCUgCgAAgUCAgAUUAAggAUgCUCAACUgCAAAAUgCUCggUgUgUCCUgCAAAUUgAUAAUgCUAAACUggCUgCUgAggACUUCAgACUgAAgUAUg AgA CUgAgAgAggAAUACgUCUAACAgUggAAgCUgAUCUCCAAggCCUgAAUAAggUCUUUgAUgACCUAACCCUACAU
AAAACAgAUUUggAgAUUCAAAUUgAAgAACUgAAUAAAgACCUAgCUCUCCUCAAAAAggAgCAUCAggAggAAgUCgAUggCCUACACAAgCAUCUgggCAACACUgUCAAUgUggAggUUgA UgC UgCUCCAggCCUgAACCUUggCgUCAUCAUgAAUgAAAUgAggCAgAAgUAUgAAgUCAUggCCCAgAAgAACCUUCA
AgAggCCAAAgAACAgUUUgAgAgACAgACUgCAgUUCUgCAgCAACAggUCACAgUgAAUACUgAAgAAUUAAAAggAACUgAggUUCAACUAACggAgCUgAgACgCACCUCCCAgAgCCUUg AgA UAgAACUCCAgUCCCAUCUCAgCAUgAAAgAgUCUUUggAgCACACUCUAgAggAgACCAAggCCCgUUACAgCAgC
CAgUUAgCCAACCUCCAgUCgCUgUUgAgCUCUCUggAggCCCAACUgAUgCAgAUUCggAgUAACAUggAACgCCAgAACAACgAAUACCAUAUCCUUCUUgACAUAAAgACUCgACUUgAACA ggA AAUUgCUACUUACCgCCgCCUUCUggAAggAgAAgACgUAAAAACUACAgAAUAUCAgUUAAgCACCCUggAAgAg
AgAgAUAUAAAgAAAACCAggAAgAUUAAgACAgUCgUgCAAgAAgUAgUggAUggCAAggUCgUgUCAUCUgAAgUCAAAgAggUggAAgAAAAUAUCUAAAUAgCUACCAgAAggAgAUgCUg CUg AggUUUUgAAAgAAAUUUggCUAUAAUCUUAUCUUUgCUCCCUgCAAgAAAUCAgCCAUAAgAAAgCACUAUUAAUAC
UCUgCAgUgAUUAgAAggggUggggUggCgggAAUCCUAUUUAUCAgACUCUgUAAUUgAAUAUAAAUgUUUUACUCAgAggAgCUgCAAAUUgCCUgCAAAAAUgAAAUCCAgUgAgCACUAgA AUA UUUAAAACAUCAUUACUgCCAUCUUUAUCAUgAAgCACAUCAAUUACAAgCUgUAgACCACCUAAUAUCAAUUUg
UAggUAAUgUUCCUgAAAAUUgCAAUACAUUUCAAUUAUACUAAACCUCACAAAgUAgAggAAUCCAUgUAAAUUgCAAAUAAACCACUUUCUAAUUUUUUCCUgUUUCUgAAUUgUAAAACCCC CUU UgggAgUCCCUggUUUCUUAUUgAgCCAAUUUCUggg
